# Supplementary material for: Synthesis and evaluation of cationic norbornanes as peptidomimetic antibacterial agents
Source: Royal Society of Chemistry journal article supplement (doi:10.1039/c5ob00621j), 2015-01-01
Supplement: c5ob00621j1.pdf [file c5ob00621j1.pdf]

## Synthesis and Evaluation of Cationic Norbornanes as Peptidomimetic Antibacterial Agents

Shane M. Hickey,<sup>†</sup> Trent D. Ashton,<sup>†</sup> Simren K. Khosa,<sup>†</sup> Ryan N. Robson,<sup>†</sup> Jonathan M. White,<sup>‡</sup> Jian Li,<sup>§</sup>  
Roger L. Nation,<sup>§</sup> Heidi Y. Yu,<sup>§</sup> Alysha G. Elliott,<sup>#</sup> Mark S. Butler,<sup>#</sup> Johnny X. Huang,<sup>#</sup> Matthew A. Cooper,<sup>#</sup>  
and Frederick M. Pfeffer<sup>\*,†</sup>

<sup>†</sup>*Research Centre for Chemistry and Biotechnology, School of Life and Environmental Sciences, Deakin University,  
Waurin Ponds, Victoria, 3216, Australia,*

<sup>‡</sup>*Bio21 Institute, School of Chemistry, University of Melbourne, Parkville, Victoria, 3010, Australia,*

<sup>§</sup>*Drug Delivery, Disposition and Dynamics, Monash Institute of Pharmaceutical Science, Royal Parade, Parkville,  
Victoria, 3052, Australia and,*

<sup>#</sup>*Institute for Molecular Bioscience, The University of Queensland, Brisbane, Queensland, 4072, Australia.*

*fred.pfeffer@deakin.edu.au*

### CONTENTS

|                                                                      |       |
|----------------------------------------------------------------------|-------|
| • Experimental data for all compounds                                | p 2   |
| • <sup>1</sup> H and <sup>13</sup> C NMR spectra for novel compounds | p 23  |
| • NOESY spectra for <b>4a</b>                                        | p 126 |
| • ROESY spectra for <b>S19a</b> and <b>S19b</b>                      | p 127 |
| • <sup>1</sup> H NMR spectra for <b>S20</b>                          | p 129 |
| • Crystallography data for <b>4a</b>                                 | p 133 |
| • Table S1 containing a list of all bacterial strains tested         | p 135 |
| • References                                                         | p 136 |

## Experimental

### General experimental

Chemicals purchased from commercial sources were used without further purification. Dry  $\text{CHCl}_3$  and DMF were obtained using the Pure Solv solvent drying system (Innovative Technology, Inc., Amesbury, MA, USA). Solvents were degassed and passed through two drying chambers of alumina and stored and collected under a positive pressure of nitrogen gas.

All microwave reactions were conducted using a CEM Discover S-Class Explorer 48 Microwave Reactor, operating on a frequency of 50/60 Hz and continuous irradiation power from 0–300 W. All reactions were performed in sealed reaction vessels.

All melting points were obtained using Stuart Scientific SMP3 melting point apparatus and are uncorrected. All  $^1\text{H}$  and  $^{13}\text{C}$  NMR spectra were collected on either a JEOL JNM-GX 270 MHz FT-NMR spectrometer, a JEOL JNM-ECP 400 MHz FT-NMR spectrometer, or a BRUKER ADVANCE III 500 MHz FT-NMR spectrometer where indicated. All NMR experiments were performed at 25 °C unless otherwise stated. All 2D NMR experiments were performed on a BRUKER ADVANCE 500 MHz FT-NMR spectrometer. Samples were dissolved in  $\text{CDCl}_3$ ,  $\text{DMSO}-d_6$  or  $\text{CD}_3\text{OD}$  where specified with the residual solvent peak used as the internal reference –  $\text{CDCl}_3$ ; 7.26 ( $^1\text{H}$ ) and 77.0 ( $^{13}\text{C}$ ),  $\text{DMSO}-d_6$ ; 2.50 ( $^1\text{H}$ ) and 39.52 ( $^{13}\text{C}$ ),  $\text{CD}_3\text{OD}$ ; 3.31 ( $^1\text{H}$ ) and 49.0 ( $^{13}\text{C}$ ).<sup>1</sup> Proton spectra are reported as chemical shift (ppm)  $\delta$  (integral, multiplicity (s = singlet, br s = broad singlet, d = doublet, t = triplet, q = quartet, quin = quintet and m = multiplet), coupling constant (Hz), assignment). Carbon spectra are reported as chemical shift  $\delta$  (ppm).

High resolution mass spectral data was collected on an Agilent Technologies 6520 QTOF mass spectrometer (LC-1200 series) under the following conditions: gas temperature (300 °C), nitrogen drying gas (10.0 L min<sup>-1</sup>), capillary voltage (3500 V), fragmentor (140 V), and nebuliser (45 psi) in a 80% MeCN in  $\text{H}_2\text{O}$  solvent system. Analyte solutions were prepared in HPLC grade methanol (conc. ~ 1 mg mL<sup>-1</sup>).

All norbornane-based compounds are named using the von-Baeyer system of nomenclature.<sup>2</sup> All other parts of the structure are named following the IUPAC guidelines. Numbering of norbornane protons follows the general structures shown below. Protons on the bridge carbon are labelled either *syn* (*s*) or *anti* (*a*) in regards to the priority functional group.

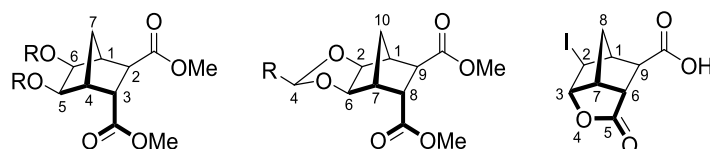

## 2-Methylisothiuronium iodide (S3)<sup>3</sup>

[CAS Reg. No. 14257-47-7]

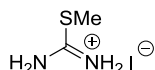

A mixture of thiourea (10.0 g, 0.13 mol), iodomethane (8.2 mL, 0.13 mol) and MeOH (100 mL) was heated at 65 °C for 90 min. The MeOH was removed *in vacuo* and the resulting yellow solid was transferred to a sintered glass funnel and washed with Et<sub>2</sub>O (5 × 50 mL) to afford compound the title compound (28.2 g, 99%) as an amorphous white powder.

m.p: 115.3–117.6 °C (lit. 117 °C).<sup>4</sup>

<sup>1</sup>H NMR (270 MHz, DMSO-*d*<sub>6</sub>) δ 2.56 (3H, s, CH<sub>3</sub>), 8.89 (4H, br s, NH<sub>2</sub>).

<sup>13</sup>C NMR (67.5 MHz, DMSO-*d*<sub>6</sub>) δ 13.3, 171.1.

## *N,N'*-Bis(*tert*-butoxycarbonyl)-*S*-methylisothiurea (S4)<sup>3</sup>

[CAS Reg. No. 107819-90-9]

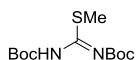

To a stirring solution of 2-methylisothiuronium iodide **S3** (9.82 g, 45.0 mmol) in sat. NaHCO<sub>3</sub> (50 mL) and CH<sub>2</sub>Cl<sub>2</sub> (105 mL) was added Boc<sub>2</sub>O (19.67 g, 90.1 mmol) using CH<sub>2</sub>Cl<sub>2</sub> (3 × 25 mL). After 48 h the reaction mixture was transferred to a separatory funnel and the organic phase was isolated and the aqueous phase was extracted using CH<sub>2</sub>Cl<sub>2</sub> (2 × 50 mL). The combined organic phase was dried (MgSO<sub>4</sub>), filtered, and concentrated *in vacuo*. The crude solid was stirred (EtOH/H<sub>2</sub>O, 1:9, 100 mL) for 1 h before the mixture was cooled to 0 °C and solid was collected by vacuum filtration, washing with H<sub>2</sub>O (EtOH/H<sub>2</sub>O, 1:9, 50 mL) gives the title compound (12.26 g, 94%) as a white powder.

m.p: 122.3–123.8 °C (lit. 127 °C).<sup>5</sup>

<sup>1</sup>H NMR (270 MHz, CDCl<sub>3</sub>) δ 1.51 (9H, br s, *t*-Bu), 1.53 (9H, br s, *t*-Bu), 2.40 (3H, s, CH<sub>3</sub>), 11.61 (1H, br s, NH).

<sup>13</sup>C NMR (100 MHz, CDCl<sub>3</sub>) δ 14.6, 28.2, 81.1, 83.4, 150.9, 160.9, 171.6.

HRMS (ESI, *m/z*) for C<sub>12</sub>H<sub>22</sub>N<sub>2</sub>O<sub>4</sub>S [M + Na]<sup>+</sup> calc. 313.1193; found 313.1186.

## 2-[2,3-Bis(*tert*-butoxycarbonyl)guanidino]ethylamine (11)<sup>6</sup>

[CAS Reg. No. 203258-44-0]

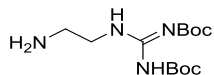

A solution of Boc-protected methylisothioureia **S4** (20.4 g, 70.3 mmol) in CH<sub>2</sub>Cl<sub>2</sub> (110 mL) was added in one portion to a stirred solution of 1,2-ethylenediamine (11.7 mL, 176 mmol) in CH<sub>2</sub>Cl<sub>2</sub> (150 mL). The reaction was stirred at 21 °C for 90 min. The reaction mixture was then transferred to a separatory funnel and washed with H<sub>2</sub>O (2 × 80 mL), brine (80 mL), then dried (MgSO<sub>4</sub>) and filtered. The solvent was removed *in vacuo* at ambient temperature to afford the title compound (20.7 g, 97%) as a white powder.

m.p: 96.2–100.1 °C.

<sup>1</sup>H NMR (270 MHz, CDCl<sub>3</sub>) δ 1.50 (9H, br s, *t*-Bu), 1.51 (9H, br s, *t*-Bu), 2.90 (2H, t, *J* = 6.2 Hz, CH<sub>2</sub>), 3.49 (2H, app. q, *J* = 5.5 Hz, CH<sub>2</sub>), 8.67 (1H, br s, NH), 11.51 (1H, br s, NH).

<sup>13</sup>C NMR (67.5 MHz, CDCl<sub>3</sub>) δ 28.2, 28.4, 41.1, 43.5, 79.4, 83.2, 153.3, 156.5, 163.7.

HRMS (ESI, *m/z*) for C<sub>13</sub>H<sub>26</sub>N<sub>4</sub>O<sub>4</sub> [M + H]<sup>+</sup> calc. 303.2027; found 303.2032.

## 2-[2,3-Bis(*tert*-butoxycarbonyl)guanidino]propylamine (17)<sup>6</sup>

[CAS Reg. No. 214151-16-3]

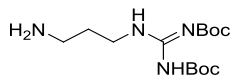

Performed as for the synthesis of amine **11**, using Boc-protected methylisothioureia **S4** (565 mg, 2.0 mmol) in CH<sub>2</sub>Cl<sub>2</sub> (4.5 mL) and 1,3-diaminopropane (406 μL, 4.9 mmol) in CH<sub>2</sub>Cl<sub>2</sub> (2.7 mL). The reaction was stirred at 21 °C for 40 min and the product was isolated as a colourless oil (476 mg, 70%).

<sup>1</sup>H NMR (270 MHz, CDCl<sub>3</sub>) δ 1.49 (9H, br s, *t*-Bu), 1.50 (9H, br s, *t*-Bu), 1.73 (2H, quin, *J* = 6.7 Hz, CH<sub>2</sub>), 2.79 (2H, t, *J* = 6.7 Hz, CH<sub>2</sub>), 3.51 (2H, app. q, *J* = 6.7 Hz, CH<sub>2</sub>), 8.43 (1H, br s, NH), 11.47 (1H, br s, NH).

## 2-[2,3-Bis(*tert*-butoxycarbonyl)guanidino]butylamine (16)<sup>6</sup>

[CAS Reg. No. 128009-23-4]

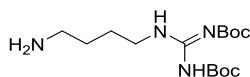

Synthesis of compound **16** was achieved as per **11**, using Boc-protected methylisothiurea **S4** (564 mg, 1.9 mmol) in CH<sub>2</sub>Cl<sub>2</sub> (4.5 mL) and 1,4-diaminobutane (488 µL, 4.9 mmol) in CH<sub>2</sub>Cl<sub>2</sub> (2.7 mL). The reaction was allowed to stir at 21 °C for 75 min and the product was isolated as a colourless oil (438 mg, 61%).

<sup>1</sup>H NMR (270 MHz, CDCl<sub>3</sub>) δ 1.44–1.67 (22H, m, 2 × *t*-Bu, 2 × CH<sub>2</sub>), 2.12 (2H, br s, NH<sub>2</sub>), 2.78 (2H, t, *J* = 6.9 Hz, CH<sub>2</sub>), 3.42 (2H, app. q, *J* = 6.9 Hz, CH<sub>2</sub>), 8.37 (1H, br s, NH), 11.50 (1H, br s, NH).

HRMS (ESI, *m/z*) calculated for C<sub>15</sub>H<sub>30</sub>N<sub>4</sub>O<sub>4</sub> [M + H]<sup>+</sup> 331.2340; found 331.2352.

## 2-(*tert*-Butoxycarbonylamino)ethylamine (**6**)<sup>7</sup>

[CAS Reg. No. 57260-73-8]

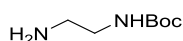

A solution of Boc<sub>2</sub>O (8.35 g, 38.3 mmol) in THF (75 mL) was added dropwise, over approximately 30 min, to a stirred solution of 1,2-ethylenediamine (8.4 mL, 125 mmol) in THF (25 mL). The reaction was stirred for approximately 4 h after which time the solution was filtered and the solvent then removed *in vacuo* to afford the desired product (5.65 g, 92%) as a viscous oil.

<sup>1</sup>H NMR (270 MHz, CDCl<sub>3</sub>) δ 1.16 (2H, br s, NH<sub>2</sub>), 1.43 (9H, br s, *t*-Bu), 2.78 (2H, t, *J* = 6.0 Hz, CH<sub>2</sub>NH), 3.15 (2H, q, *J* = 6.0 Hz, CH<sub>2</sub>NH<sub>2</sub>), 4.83 (1H, br s, NH).

<sup>13</sup>C NMR (67.5 MHz, CDCl<sub>3</sub>) δ 28.4, 40.7, 41.8, 43.4, 156.3.

HRMS (ESI, *m/z*) for C<sub>7</sub>H<sub>16</sub>N<sub>2</sub>O<sub>2</sub> [M + H]<sup>+</sup> calc. 161.1285; found 161.1290.

## 3,4-Dimethoxy-3-cyclobutene-1,2-dione (**S5**)<sup>8</sup>

[CAS Reg. No. 5222-73-1]

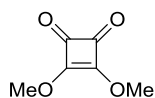

To a stirring solution of squaric acid (1.00 g, 8.78 mmol) in MeOH (18 mL) was added trimethyl orthoformate (1.9 mL, 17.6 mmol) and the reaction was heated at 65 °C for 24 h. The reaction mix was concentrated under reduced pressure before being diluted with CHCl<sub>3</sub> (20 mL). The organic phase was washed with sat. NaHCO<sub>3</sub> (2 × 10 mL), brine (10 mL), dried (MgSO<sub>4</sub>), filtered and concentrated *in vacuo* to give a yellow oil which was purified by a silica plug (10% EtOAc in CH<sub>2</sub>Cl<sub>2</sub>) to afford the title compound (896 mg, 72%) as a white solid.

*R<sub>f</sub>* = 0.33 (10% EtOAc in CH<sub>2</sub>Cl<sub>2</sub>).

m.p: 52.5–54.9 °C (lit. 55.0 °C).<sup>8</sup>

<sup>1</sup>H NMR (270 MHz, CDCl<sub>3</sub>) δ 4.37 (6H, s, 2 × CH<sub>3</sub>).

<sup>13</sup>C NMR (67.5 MHz, CDCl<sub>3</sub>) δ 67.5, 184.6, 189.3.

HRMS (ESI, *m/z*) for C<sub>6</sub>H<sub>6</sub>O<sub>4</sub> [M + H]<sup>+</sup> calc. 143.0339; found 143.0340.

### 3-Benzylamine-4-methoxycyclobut-3-ene-1,2-dione (S2) <sup>9</sup>

[CAS Reg. No. 636601-12-2]

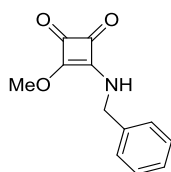

To a stirring solution of squaric ester **S5** (257 mg, 1.81 mmol) in MeOH (6.5 mL) was added benzylamine (200 μL, 1.83 mmol), and the reaction was stirred for 1 h at ambient temperature. The crude product was concentrated under vacuum before being purified by column chromatography (20% MeCN in CH<sub>2</sub>Cl<sub>2</sub>) to give the title compound (192 mg, 49%) as a white solid.

*R<sub>f</sub>* = 0.5 (20% MeCN in CH<sub>2</sub>Cl<sub>2</sub>).

m.p: 122.9–123.7 °C (lit. 122–124 °C).<sup>9</sup>

<sup>1</sup>H NMR (400 MHz, DMSO-*d*<sub>6</sub>, 40 °C) δ 4.29 (3H, s, OMe), 4.46 (1H, br s, CH<sub>2</sub>), 4.68 (1H, br s, CH<sub>2</sub>), 7.29–7.39 (5H, m, ArH), 9.06–9.27 (1H, m, NH).

<sup>13</sup>C NMR (67.5 MHz, DMSO-*d*<sub>6</sub>) δ 47.1, 60.1, 127.3, 127.4, 128.6, 138.2, 172.0, 177.5, 182.4, 189.4.

HRMS (ESI, *m/z*) for C<sub>12</sub>H<sub>11</sub>NO<sub>3</sub> [M + H]<sup>+</sup> calc. 218.0812; found 218.0818.

### Hexadecanal (S6)<sup>10</sup>

[CAS Reg. No. 629-80-1]

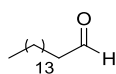

To the stirring solution of DMSO (710 μL, 10.0 mmol) in CH<sub>2</sub>Cl<sub>2</sub> (40 mL) at –78 °C was added oxalyl chloride (440 μL, 5.0 mmol) under an inert atmosphere. After 20 min 1-hexadecanol (484 mg, 2.0 mmol) in CH<sub>2</sub>Cl<sub>2</sub> (6 mL) was added and the reaction was stirred for 5.5 h at –41 °C. The reaction was quenched with Et<sub>3</sub>N

(3 mL, 21.5 mmol) and slowly warmed to ambient temperature over 30 min. The reaction mix was washed with sat. NaHCO<sub>3</sub> (50 mL) and extracted with CH<sub>2</sub>Cl<sub>2</sub> (3 × 30 mL). The combined organic phase was washed with 2M HCl (2 × 20 mL), sat. NaHCO<sub>3</sub> (20 mL), brine (20 mL), dried (MgSO<sub>4</sub>), filtered and concentrated *in vacuo* to afford a yellow solid (389 mg, 81%).

m.p: 36.4–38.0 °C (lit. 33.0–35.0 °C).<sup>11</sup>

<sup>1</sup>H NMR (270 MHz, CDCl<sub>3</sub>) δ 0.87 (3H, t, *J* = 6.4 Hz, CH<sub>3</sub>), 1.25–1.30 (24H, m, 12 × CH<sub>2</sub>), 1.62 (2H, t, *J* = 7.4 Hz, CH<sub>2</sub>), 2.41 (2H, dt, *J* = 7.3, 1.9 Hz, CH<sub>2</sub>), 9.76 (1H, t, *J* = 1.9 Hz, CHO).

<sup>13</sup>C NMR (100 MHz, CDCl<sub>3</sub>) δ 14.2, 22.2, 22.8, 29.3, 29.5, 29.6, 29.7, 29.8 (5 × C), 32.1, 44.1, 203.1.

### Methyl-3-(4-hydroxyphenyl)propionate (S7) 170<sup>12</sup>

[CAS Reg. No. 5597-50-2]

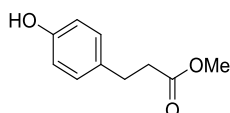

To the stirring solution of 3-(4-hydroxyphenyl)-propanoic acid (5.02 g, 30.23 mmol) in MeOH (50 mL), conc. H<sub>2</sub>SO<sub>4</sub> (50 μL) was added and the reaction was heated at 65 °C for 16 h. The reaction mix was concentrated and the resulting yellow oil was dissolved in EtOAc (25 mL), washed with sat. NaHCO<sub>3</sub> (20 mL), brine (20 mL), dried (MgSO<sub>4</sub>), filtered and concentrated *in vacuo* to give the title compound (4.78 g, 88%) as a viscous yellow oil that required no further purification.

<sup>1</sup>H NMR (270 MHz, CDCl<sub>3</sub>) δ 2.58–2.64 (2H, m, CH<sub>2</sub>), 2.88 (2H, t, *J* = 7.4 Hz, CH<sub>2</sub>), 3.67 (3H, s, Me), 5.85 (1H, br s, OH), 6.73–6.78 (2H, m, ArH), 7.01–7.07 (2H, m, ArH).

<sup>13</sup>C NMR (67.5 MHz, CDCl<sub>3</sub>) δ 30.2, 36.2, 51.9, 115.5 (2 × C), 129.5 (2 × C), 132.4, 154.3, 174.2.

HRMS (ESI, *m/z*) for C<sub>10</sub>H<sub>12</sub>O<sub>3</sub> [M + H]<sup>+</sup> calc. 181.0859; found 181.0857.

### Methyl 3-[4-(octyloxy)phenyl]propanoate (S8)

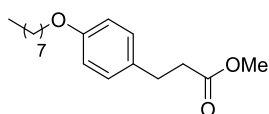

A mixture of alcohol S7 (1.01 g, 5.63 mmol), K<sub>2</sub>CO<sub>3</sub> (2.33 g, 8.45 mmol), 1-iodooctane (2.6 mL, 14.4 mmol) and DMF (8.7 mL), was stirred for 4 d at ambient temperature protected from light. The reaction was diluted with EtOAc (30 mL), and the organic phase was washed with H<sub>2</sub>O (3 × 25 mL), brine (25 mL), dried (MgSO<sub>4</sub>),

filtered, and concentrated *in vacuo* to give a yellow liquid which was purified by column chromatography (pet. spirits–5% EtOAc in pet. spirits) which gave the title compound (1.26 g, 77%) as a colourless liquid.

$R_f$  = 0.44 (10% EtOAc in pet. spirits).

$^1\text{H}$  NMR (400 MHz,  $\text{CDCl}_3$ )  $\delta$  0.89 (3H, t,  $J$  = 6.7 Hz,  $\text{CH}_3$ ), 1.28–1.48 (10H, m,  $5 \times \text{CH}_2$ ), 1.76 (2H, quin,  $J$  = 6.6 Hz,  $\text{CH}_2$ ), 2.60 (2H, dd,  $J$  = 8.2, 7.5 Hz,  $\text{CH}_2$ ), 2.89 (2H, t,  $J$  = 7.6 Hz,  $\text{CH}_2$ ), 3.67 (3H, s, OMe), 3.92 (2H, t,  $J$  = 6.6 Hz,  $\text{OCH}_2$ ), 6.82 (2H, d,  $J$  = 8.6 Hz, ArH), 7.10 (2H, d,  $J$  = 8.6 Hz, ArH).

$^{13}\text{C}$  NMR (67.5 MHz,  $\text{CDCl}_3$ )  $\delta$  14.2, 22.8, 26.2, 29.4 ( $2 \times \text{C}$ ), 29.5, 30.3, 32.0, 36.2, 51.7, 68.1, 114.6 ( $2 \times \text{C}$ ), 129.3 ( $2 \times \text{C}$ ), 132.5, 157.8, 173.6.

HRMS (ESI,  $m/z$ ) for  $\text{C}_{18}\text{H}_{28}\text{O}_3$   $[\text{M} + \text{H}]^+$  calc. 293.2111; found 293.2117.

### 3-[4-(Octyloxy)phenyl]propan-1-ol (S9)

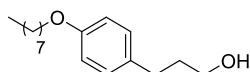

Under an inert atmosphere, ester **S8** (1.08 g, 3.68 mmol) was stirred in PhMe (18 mL), at 0 °C before Red-Al (2.8 mL, 9.2 mmol) was slowly added. The reaction was warmed to ambient temperature over 30 min and then stirred for a further 16 h. The reaction mix was quenched with  $\text{H}_2\text{O}$  (15 mL) and was left to stir for 2 h. The crude product was extracted with EtOAc ( $2 \times 20$  mL), and the combined organic phase was washed with brine (20 mL), dried ( $\text{MgSO}_4$ ), filtered, and concentrated *in vacuo*. Purification was achieved by column chromatography (20% EtOAc in pet. spirits) to give the title compound (869 mg, 89%) as a white waxy solid.

$R_f$  = 0.25 (20% EtOAc in pet. spirits).

$^1\text{H}$  NMR (270 MHz,  $\text{CDCl}_3$ )  $\delta$  0.89 (3H, t,  $J$  = 6.6 Hz,  $\text{CH}_3$ ), 1.29–1.47 (10H, m,  $5 \times \text{CH}_2$ ), 1.51 (1H, s, OH), 1.72–1.91 (4H, m,  $2 \times \text{CH}_2$ ), 2.65 (2H, t,  $J$  = 7.3 Hz,  $\text{ArCH}_2$ ), 3.66 (2H, t,  $J$  = 6.4 Hz,  $\text{OCH}_2$ ), 3.93 (2H, t,  $J$  = 6.6 Hz,  $\text{OCH}_2$ ), 6.80–6.85 (2H, m, ArH), 7.07–7.13 (2H, m, ArH).

$^{13}\text{C}$  NMR (67.5 MHz,  $\text{CDCl}_3$ )  $\delta$  14.2, 22.8, 26.2, 29.4, 29.5 ( $2 \times \text{C}$ ), 31.3, 31.9, 34.6, 62.4, 68.2, 114.6 ( $2 \times \text{C}$ ), 129.4 ( $2 \times \text{C}$ ), 133.7, 157.4.

HRMS (ESI,  $m/z$ ) for  $\text{C}_{17}\text{H}_{28}\text{O}_2$   $[\text{M} + \text{H}]^+$  calc. 265.2162; found 265.2170.

### 3-[4-(Octyloxy)phenyl]propanal (S10)

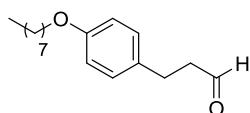

To the stirring solution of DMSO (1.1 mL, 15.3 mmol) in dry CH<sub>2</sub>Cl<sub>2</sub> (60 mL) at -78 °C was added oxalyl chloride (660 µL, 7.7 mmol) under an inert atmosphere. After 20 min alcohol **S9** (809 mg, 3.06 mmol) in CH<sub>2</sub>Cl<sub>2</sub> (16 mL) was added and the reaction was stirred for 5.5 h at -41 °C. The reaction mixture was quenched with Et<sub>3</sub>N (5 mL) and warmed slowly to ambient temperature over 60 min. The reaction mix was washed with sat. NaHCO<sub>3</sub> (50 mL) and extracted with CH<sub>2</sub>Cl<sub>2</sub> (2 × 30 mL). The combined organic phase was washed with 2M HCl (30 mL), sat. NaHCO<sub>3</sub> (30 mL), brine (30 mL), dried (MgSO<sub>4</sub>), filtered and concentrated *in vacuo* to give the title compound (668 mg, 83%) as a yellow oil that was used directly in ensuing reactions due to compound instability.

### Ethyl 4-(octyloxy)benzoate (**S11**)<sup>13</sup>

[CAS Reg. No. 72885-31-5]

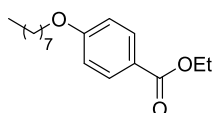

A stirring solution of ethyl 4-hydroxybenzoate (3.01 g, 18.11 mmol) and K<sub>2</sub>CO<sub>3</sub> (7.56 g, 54.70 mmol) in DMF (28 mL) was protected from light and treated with 1-iodooctane (4.3 mL, 24.53 mmol) for 16 h. The solution was then diluted with EtOAc (25 mL), washed H<sub>2</sub>O (3 × 50 mL), brine (30 mL), dried (MgSO<sub>4</sub>) and concentrated *in vacuo*. Purification by column chromatography (pet. spirits–5% EtOAc in pet. spirits) provided the title compound (4.58 g, 91%) as a clear oil.

*R*<sub>f</sub> = 0.40 (5% EtOAc in pet. spirits).

<sup>1</sup>H NMR (400 MHz, CDCl<sub>3</sub>) δ 0.89 (3H, t, *J* = 6.7 Hz, CH<sub>3</sub>), 1.29–1.48 (13H, m, 5 × CH<sub>2</sub>CH<sub>3</sub>), 1.80 (2H, app. quin, *J* = 6.7 Hz, CH<sub>2</sub>CH<sub>2</sub>O), 4.00 (2H, t, *J* = 6.6 Hz, CH<sub>2</sub>O), 4.34 (2H, q, *J* = 7.1 Hz, C(O)OCH<sub>2</sub>), 6.90 (2H, d, *J* = 8.9 Hz, ArH), 7.98 (2H, d, *J* = 9.0 Hz, ArH).

### 4-(Octyloxy)benzyl alcohol (**S12**)<sup>14</sup>

[CAS Reg. No. 67698-68-4]

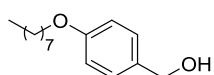

To a stirring solution of **S11** (4.43 g, 15.91 mmol) in PhMe (32 mL) under N<sub>2</sub> at 0 °C was added a solution of Red-Al® (12.2 mL, 40.64 mmol 65 wt.% in PhMe) slowly and the resulting solution stirred for 30 min before being allowed to warm to ambient temperature and stirred for a further 16 h. The solution was quenched with H<sub>2</sub>O (25 mL) and extracted with EtOAc (3 × 25 mL). The combined organic phases were washed with brine

(25 mL), dried (MgSO<sub>4</sub>) and concentrated *in vacuo*. The crude material was purified by column chromatography (20% EtOAc in pet. spirits) to afford the title compound (3.08 g, 82%) as a transparent yellow oil.

$R_f$  = 0.39 (20% EtOAc in pet. spirits).

<sup>1</sup>H NMR (400 MHz, CDCl<sub>3</sub>)  $\delta$  0.89 (3H, t,  $J$  = 6.6 Hz, CH<sub>3</sub>), 1.26–1.46 (10H, m, 5  $\times$  CH<sub>2</sub>), 1.66 (1H, br s, OH), 1.75 (2H, app. quin,  $J$  = 6.9 Hz, CH<sub>2</sub>CH<sub>2</sub>O), 3.92 (2H, t,  $J$  = 6.6 Hz, CH<sub>2</sub>O), 4.58 (2H, s, CH<sub>2</sub>OH), 6.86 (2H, d,  $J$  = 8.6 Hz, ArH), 7.25 (2H, d,  $J$  = 8.8 Hz, ArH).

#### 4-(Octyloxy)benzaldehyde (R13)<sup>15</sup>

[CAS Reg. No. 24083-13-4]

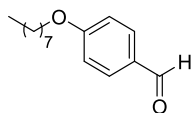

A solution of **S12** (3.00 g, 12.69 mmol) and manganese dioxide (21.44 g, 246.62 mmol) in CHCl<sub>3</sub> (36 mL) was stirred for 72 h at ambient temperature. The resulting slurry was filtered over celite and the filtrate concentrated *in vacuo* to afford the title compound (2.63 g, 88%) as a transparent yellow oil which was used without further purification.

<sup>1</sup>H NMR (270 MHz, CDCl<sub>3</sub>)  $\delta$  0.89 (3H, t,  $J$  = 6.8 Hz, CH<sub>3</sub>), 1.29–1.46 (10H, m, 5  $\times$  CH<sub>2</sub>), 1.81 (2H, app. quin,  $J$  = 8.2 Hz, CH<sub>2</sub>CH<sub>2</sub>O), 4.04 (2H, t,  $J$  = 6.6 Hz, CH<sub>2</sub>O), 6.99 (2H, d,  $J$  = 8.8 Hz, ArH), 7.83 (2H, d,  $J$  = 8.8 Hz, ArH), 9.88 (1H, s, CHO).

#### Dimethyl bicyclo[2.2.1]hept-5-ene-3-endo-2-exo-dicarboxylate (S14)

[CAS Reg. No. 3014-58-2]

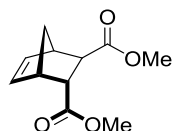

#### Method A<sup>16</sup>

To the stirring solution of dimethyl fumarate (65.3 g, 0.453 mol) in THF (200 mL), was added freshly cracked cyclopentadiene (40 mL, 0.476 mol), and the reaction was stirred at ambient temperature for 16 h. The solvent was removed under reduced pressure to give the title compound (95.2 g, 99%) as a clear liquid.

#### Method B<sup>17</sup>

A 35 mL MW vial was charged with dicyclopentadiene (2.0 mL, 15.0 mmol), dimethyl fumarate (2.88 g, 20.0 mmol) and hydroquinone (100 mg, 0.90 mmol), and heated using microwave irradiation to 150 °C for 2 h. The resulting orange oil was purified by flash column chromatography (10% EtOAc in pet. spirits) to give a clear oil (4.14 g, 98%).

$R_f$  = 0.32 (10% EtOAc in pet. spirits).

<sup>1</sup>H NMR (400 MHz, CDCl<sub>3</sub>)  $\delta$  1.45 (1H, dd,  $J$  = 8.8, 1.7 Hz, H7s), 1.61 (1H, d,  $J$  = 8.8 Hz, H7a), 2.68 (1H, dd,  $J$  = 3.1, 1.2 Hz, H2), 3.12 (1H, br s, H4), 3.25 (1H, br s, H1), 3.37 (1H, app. t,  $J$  = 5.6 Hz, H3), 3.64 (3H, s, Me), 3.71 (3H, s, Me), 6.06 (1H, dd,  $J$  = 5.6, 2.8 Hz, H6), 6.27 (1H, dd,  $J$  = 5.6, 3.1 Hz, H5).

<sup>13</sup>C NMR (100 MHz, CDCl<sub>3</sub>)  $\delta$  45.5, 46.9, 47.2, 47.5, 47.7, 51.7, 51.9, 135.3, 137.7, 174.0, 175.2.

HRMS (ESI,  $m/z$ ) for C<sub>11</sub>H<sub>14</sub>O<sub>4</sub> [M + Na]<sup>+</sup> calc. 233.0784; found 233.0785.

#### Dimethyl 5,6-*exo*-dihydroxybicyclo[2.2.1]heptane-3-*endo*-2-*exo*-dicarboxylate (3)

[CAS Reg. No. 1228039-59-5]

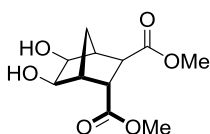

#### Method A<sup>18</sup>

The dimethyl ester **S14** (3.05 g, 14.5 mmol) and NMO·H<sub>2</sub>O (1.87 g, 16.0 mmol) were dissolved in a solution of H<sub>2</sub>O/acetone (1:4, 36 mL) to which OsO<sub>4</sub> (4% in H<sub>2</sub>O, 730  $\mu$ L, 0.40 mol%) was added. The reaction was stirred for 3 d and then quenched with sat. NaHSO<sub>3</sub> (30 mL). The suspension was extracted with EtOAc (4  $\times$  25 mL), and the combined organic phase was washed with brine (25 mL), dried (MgSO<sub>4</sub>), filtered, and concentrated *in vacuo* to give the title compound (3.34 g, 94%) as a white solid.

#### Method B<sup>19</sup>

To a stirring solution of dimethyl ester **S14** (270 mg, 1.28 mmol), *t*-BuOH (4.7 mL) and H<sub>2</sub>O (1.2 mL) at 0 °C, a solution of KMnO<sub>4</sub> (405 mg, 2.56 mmol), K<sub>2</sub>CO<sub>3</sub> (212 mg, 1.54 mmol) in H<sub>2</sub>O (6.0 mL) was added dropwise. The reaction was stirred for a further 25 min before consumption of starting material was observed by TLC analysis. The reaction mix was quenched with sat. NaHSO<sub>3</sub> (25 mL) and extracted with EtOAc (3  $\times$  20 mL). The combined organic phase was washed with brine (20 mL), dried (MgSO<sub>4</sub>), filtered, and concentrated *in vacuo* to afford the title compound (181 mg, 58%) as a white solid.

m.p: 89.9–92.3 °C (lit. 81–84 °C).<sup>18</sup>

$^1\text{H}$  NMR (270 MHz,  $\text{CDCl}_3$ )  $\delta$  1.33 (1H, d,  $J$  = 11.0 Hz, H7s), 1.78 (1H, dd,  $J$  = 11.0, 1.2 Hz, H7a), 2.40 (1H, br s, H1), 2.46 (1H, dd,  $J$  = 1.2, 4.5 Hz, H4), 2.63 (1H, d,  $J$  = 4.9 Hz, H2), 3.11 (1H, app. t,  $J$  = 5.1 Hz, H3), 3.62 (3H, s, Me), 3.64 (3H, s, Me), 3.71–3.77 (1H, m, H6), 3.85 (1H, br s, H5).

$^{13}\text{C}$  NMR (67.5 MHz,  $\text{CDCl}_3$ )  $\delta$  31.8, 44.8, 46.2, 46.4, 48.2, 52.3, 52.5, 70.2, 73.3, 173.2, 174.2.

HRMS (ESI,  $m/z$ ) for  $\text{C}_{11}\text{H}_{16}\text{O}_6$   $[\text{M} + \text{Na}]^+$  calc. 267.0839; found 267.0836.

**Bicyclo[2.2.1]hepta-5-ene-3-endo,2-exo-dicarboxylic acid (S1)**<sup>20</sup>

[CAS Reg. No. 1200-88-0]

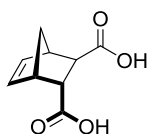

To the stirring solution of norbornene diester **S14** (1.24 g, 5.88 mmol) in THF (24.5 mL) was added 2M NaOH (12.3 mL, 24.5 mmol) and the reaction was stirred for 16 h at ambient temperature. The THF was removed under reduced pressure before the remaining aqueous solution was acidified to pH = 1 (2M HCl). The title compound (941 mg, 88%) was collected by vacuum filtration as a fine white powder.

m.p: 54.9–191.0 °C (slow decomposition) (lit. 186–187 °C).<sup>21</sup>

$^1\text{H}$  NMR (270 MHz,  $\text{DMSO}-d_6$ )  $\delta$  1.33 (1H, dd,  $J$  = 8.5, 1.4 Hz, H7s), 1.49 (1H, d,  $J$  = 8.6 Hz, H7a), 2.42 (1H, dd,  $J$  = 4.0, 1.5 Hz, H2), 3.02–3.03 (1H, m, H4), 3.15–3.18 (2H, m, H3, H1), 6.05 (1H, dd,  $J$  = 5.5, 2.3 Hz, H6), 6.28 (1H, dd,  $J$  = 5.6, 3.1 Hz, H5), 12.28 (2H, br s, COOH).

$^{13}\text{C}$  NMR (100 MHz,  $\text{DMSO}-d_6$ )  $\delta$  45.0, 46.8, 47.0, 47.1, 47.5, 135.0, 137.5, 174.2, 175.3.

HRMS (ESI,  $m/z$ ) for  $\text{C}_9\text{H}_{10}\text{O}_4$   $[\text{M} + \text{Na}]^+$  calc. 205.0468; found 205.0471.

**2-exo-Iodo-5-oxo-4-oxatricyclo[4.2.1.0<sup>3,7</sup>]nonane-9-exo-carboxylic acid (S15)**<sup>22</sup>

[CAS Reg. No. 125226-89-3]

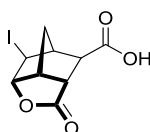

A solution of diacid **S1** (2.34 g, 12.84 mmol), NaHCO<sub>3</sub> (5.39 g, 64.2 mmol) and H<sub>2</sub>O (40 mL) at ambient temperature was stirred for approximately 45 min, after which an aqueous solution of I<sub>2</sub>/KI [0.2 M/0.6 M] was added until the solution maintained a dark brown colour. The mixture was left to stir for 20 min before addition of Na<sub>2</sub>S<sub>2</sub>O<sub>5</sub> resulting in the decolourisation of the solution. The reaction mix was then acidified to pH = 1 (6M H<sub>2</sub>SO<sub>4</sub>), resulting in a colour change to light yellow. The product was then extracted with CH<sub>2</sub>Cl<sub>2</sub> (4 × 30 mL), dried (MgSO<sub>4</sub>), and the solvent was removed *in vacuo* to give the desired iodolactone (3.76 g, 95%) as a white powder.

m.p: 129.0–132.6 °C (lit. 126.0–127.0 °C).<sup>23</sup>

<sup>1</sup>H NMR (270 MHz, CDCl<sub>3</sub>) δ 1.98 (1H, ddd, *J* = 11.9, 2.3, 1.7 Hz, H7<sub>s</sub>), 2.38 (1H, dd, *J* = 12.1, 1.2 Hz, H7<sub>a</sub>), 2.91 (1H, s, H2), 3.10 (2H, m, H1, H3), 3.22–3.27 (1H, m, H4), 3.91 (1H, d, *J* = 2.6 Hz, H6), 5.16 (1H, d, *J* = 5.0 Hz, H5), 10.65 (1H, br s, COOH).

<sup>13</sup>C NMR (100 MHz, CDCl<sub>3</sub>) δ 27.5, 35.3, 41.0, 46.3, 50.1, 50.5, 88.7, 174.9, 177.4.

HRMS (ESI, *m/z*) for C<sub>9</sub>H<sub>9</sub>IO<sub>4</sub> [*M* + Na]<sup>+</sup> calc. 330.9438; found 330.9434.

#### Methyl-2-*exo*-ioda-5-oxo-4-oxatricyclo[4.2.1.0<sup>3,7</sup>]nonane-9-*exo*-carboxylate (**S16**)<sup>22</sup>

[CAS Reg. No. 42392-48-3]

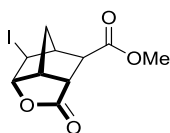

To a stirring solution of carboxylic acid **S15** (7.63 g, 24.8 mmol) in MeOH (34 mL), was added conc. H<sub>2</sub>SO<sub>4</sub> (300 μL, 5.63 mmol) and the reaction was heated to 65 °C for 16 h. The reaction mix was concentrated and the resulting yellow sludge was dissolved in CH<sub>2</sub>Cl<sub>2</sub> (40 mL), washed with H<sub>2</sub>O (20 mL), sat. NaHCO<sub>3</sub> (20 mL), brine (20 mL), dried (MgSO<sub>4</sub>), filtered and concentrated *in vacuo*. The resulting yellow viscous oil (7.15 g, 90%) required no further purification.

<sup>1</sup>H NMR (270 MHz, CDCl<sub>3</sub>) δ 1.93–1.99 (1H, m, H7<sub>s</sub>), 2.32 (1H, dd, *J* = 12.0, 1.4 Hz, H7<sub>a</sub>), 2.84 (1H, br s, H2), 3.02 (1H, br s, H3), 3.08–3.10 (1H, m, H1), 3.19–3.24 (1H, m, H4), 3.73 (3H, s, OMe), 3.88 (1H, d, *J* = 2.6 Hz, H6), 5.13 (1H, d, *J* = 5.0 Hz, H5).

<sup>13</sup>C NMR (100 MHz, CDCl<sub>3</sub>) δ 27.9, 35.2, 41.1, 46.3, 50.3, 50.6, 53.0, 88.6, 170.7, 177.3.

HRMS (ESI, *m/z*) for C<sub>10</sub>H<sub>11</sub>IO<sub>4</sub> [*M* + H]<sup>+</sup> calc. 322.9775; found 322.9773.

#### *exo*-2-Methoxycarbonylbicyclo[2.2.1]hept-5-ene-3-*endo*-carboxylic acid (**19**)<sup>22</sup>

[CAS Reg. No. 36897-94-6]

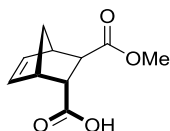

Zinc (4.49 g, 68.7 mmol) was activated in 1M HCl (53 mL) until the solid turned from a dark black to a silvery grey (*c.a* 10 min). The HCl was decanted and the zinc was washed and decanted successively with H<sub>2</sub>O (3 × 10 mL) and EtOH (3 × 10 mL). To the activated zinc a solution of iodolactone **S16** (7.14 g, 68.7 mmol) in EtOH (67 mL) was added, followed by AcOH (67 mL), and the reaction was heated to 79 °C for 3 h. The zinc was removed by filtration and the solvent was removed *in vacuo*. The crude product was diluted with CHCl<sub>3</sub> (100 mL) and washed with H<sub>2</sub>O (2 × 50 mL), brine (50 mL), dried (MgSO<sub>4</sub>), filtered and concentrated *in vacuo* to afford the title compound (4.03 g, 93%) as a white solid.

m.p: 96.4–98.2 °C.

<sup>1</sup>H NMR (270 MHz, CDCl<sub>3</sub>) δ 1.48 (1H, dd, *J* = 8.9, 1.6 Hz, H7<sub>s</sub>), 1.62 (1H, d, *J* = 8.9 Hz, H7<sub>a</sub>), 2.65 (1H, dd, *J* = 4.5, 1.5 Hz, H2), 3.13 (1H, br s, H4), 3.29 (1H, br s, H1), 3.42 (1H, app. t, *J* = 3.9 Hz, H3), 3.72 (3H, s, OMe), 6.13 (1H, dd, *J* = 5.6, 2.8 Hz, H6), 6.29 (1H, dd, *J* = 5.6, 3.2 Hz, H5).

<sup>13</sup>C NMR (67.5 MHz, CDCl<sub>3</sub>) δ 45.7, 47.1, 47.6, 47.7, 48.1, 52.4, 135.3, 137.9, 175.0, 179.5.

HRMS (ESI, *m/z*) for C<sub>10</sub>H<sub>12</sub>O<sub>4</sub> [M - H]<sup>-</sup> calc. 195.0663; found 195.0667.

### General procedure A: acetal formation

To a stirring suspension of the appropriate diol, TsOH·H<sub>2</sub>O (0.05 equiv), MgSO<sub>4</sub> (1.0 equiv) and PhMe, was treated with the required aldehyde (1.5 equiv) at 110 °C for 3 h. Solid MgSO<sub>4</sub> was removed by filtration and the filtrate was diluted with EtOAc (30 mL), washed with H<sub>2</sub>O (2 × 15 mL), brine (15 mL), dried (MgSO<sub>4</sub>), filtered and concentrated *in vacuo* to give the crude material which was purified by column chromatography (as specified below) to afford the title compound.

### Dimethyl 4-heptyl-3,5-dioxatricyclo[5.2.1.0<sup>2,6</sup>]decane-8-*endo*-9-*exo*-dicarboxylate (**4a**)

[CAS Reg. No. 1233074-95-7]

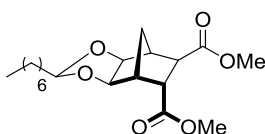

Compound **4a** was prepared from diol **3** (3.40 g, 14.34 mmol) and octanal (3.36 mL, 21.5 mmol) according to general procedure A and was purified by column chromatography (10% EtOAc in pet. spirits) to give the title compound (4.66 g, 92%) as a colourless viscous oil.

Crystals suitable for x-ray analysis were obtained from slow evaporation of a 10% EtOAc in pet. spirits solution (see Figure S8).

$R_f$  = 0.26 (10% EtOAc in pet. spirits).

$^1\text{H}$  NMR (400 MHz,  $\text{CDCl}_3$ )  $\delta$  0.82 (3H, t,  $J$  = 6.6 Hz,  $\text{CH}_3$ ), 1.19–1.36 (11H, m,  $5 \times \text{CH}_2$ , H10s), 1.56–1.59 (2H, m,  $\text{CHCH}_2$ ), 1.73 (1H, d,  $J$  = 10.8 Hz, H10a), 2.60 (2H, br s, H1, H7), 2.67 (1H, d,  $J$  = 4.5 Hz, H9), 3.18 (1H, app. t,  $J$  = 4.8 Hz, H8), 3.66 (6H, s,  $2 \times \text{OMe}$ ), 3.85 (1H, d,  $J$  = 5.6 Hz, H6), 3.98 (1H, d,  $J$  = 5.6 Hz, H2), 4.61 (1H, t,  $J$  = 4.9 Hz, H4).

$^{13}\text{C}$  NMR (100 MHz,  $\text{CDCl}_3$ )  $\delta$  13.7, 22.3, 23.9, 28.9, 29.2, 31.3, 31.5, 32.5, 43.0, 43.4, 44.8, 45.0, 51.9, 52.1, 78.7, 81.2, 104.2, 173.0, 174.2.

HRMS (ESI,  $m/z$ ) for  $\text{C}_{19}\text{H}_{30}\text{O}_6$   $[\text{M} + \text{Na}]^+$  calc. 377.1935; found 377.1924.

#### Dimethyl 4-[4'-(octyloxy)phenyl]-3,5-dioxatricyclo[5.2.1.0<sup>2,6</sup>]decane-8-*endo*-9-*exo*-dicarboxylate (**S17**)

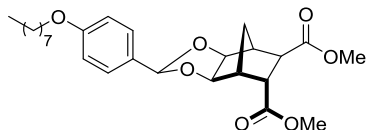

Compound **S17** was prepared from diol **3** (1.15 g, 4.71 mmol) and **S13** (1.59 g, 6.79 mmol) according to general procedure A and was purified by column chromatography (10% EtOAc in pet. spirits) to give the title compound (1.25 g, 57%) as a white powder.

$R_f$  = 0.17 (10% EtOAc in pet. spirits).

m.p: 53.2–57.8 °C.

$^1\text{H}$  NMR (400 MHz,  $\text{CDCl}_3$ )  $\delta$  0.88 (3H, t,  $J$  = 7.2 Hz,  $\text{CH}_3$ ), 1.28–1.46 (11H, m,  $5 \times \text{CH}_2$ , H10s), 1.76 (2H, app. quin,  $J$  = 6.0 Hz,  $\text{CH}_2\text{CH}_2\text{O}$ ), 2.01 (1H, dd,  $J$  = 10.9, 1.4 Hz, H10a), 2.71 (1H, dd,  $J$  = 5.5, 1.3 Hz, H7), 2.77 (1H, s, H1), 2.83 (1H, d,  $J$  = 4.5 Hz, H9), 3.28 (1H, app. t,  $J$  = 5.1 Hz, H8), 3.72 (3H, s, Me), 3.73 (3H, s, Me), 3.94 (2H, t,  $J$  = 6.6 Hz,  $\text{CH}_2$ ), 4.08 (1H, d,  $J$  = 5.7 Hz, H6), 4.12 (1H, d,  $J$  = 5.7 Hz, H2), 5.53 (1H, s, H4), 6.88 (2H, d,  $J$  = 8.7 Hz, ArH), 7.39 (2H, d,  $J$  = 8.7 Hz, ArH)

$^{13}\text{C}$  NMR (125 MHz,  $\text{CDCl}_3$ )  $\delta$  14.2, 22.8, 26.1, 29.3, 29.4, 29.5, 31.9, 32.0, 43.5, 43.9, 45.3, 45.5, 52.3, 52.5, 68.2, 79.2, 81.7, 103.4, 114.6, 127.7, 128.2, 160.4, 172.9, 174.1.

HRMS (ESI,  $m/z$ ) for  $\text{C}_{26}\text{H}_{37}\text{O}_7$   $[\text{M} + \text{H}]^+$  calc. 461.25338; found 461.25355.

### General procedure B: hydrolysis of methyl esters

A biphasic solution of methyl ester in 2 M NaOH/THF (1:4) was stirred at ambient temperature for 16 h. The reaction mixture was extracted with CH<sub>2</sub>Cl<sub>2</sub> (2 × 8 mL) and the isolated aqueous phase was acidified to pH = 1 using 2 M HCl and extracted with EtOAc (3 × 15 mL). The combined organic phase was washed with brine (10 mL), dried (MgSO<sub>4</sub>), filtered and concentrated *in vacuo* to afford the title compound.

#### 4-Heptyl-3,5-dioxatricyclo[5.2.1.0<sup>2,6</sup>]decane-8-*endo*-9-*exo*-dicarboxylic acid (5a)

[CAS Reg. No. 1233074-96-8]

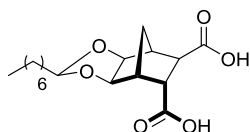

The title compound (**5a**) was prepared from diester **4a** (1.00 g, 2.82 mmol) according to general procedure B and isolated white waxy solid (795 mg, 86%).

m.p: 141.1–143.2 °C (lit. 153.0–154.0 °C).<sup>18</sup>

<sup>1</sup>H NMR (270 MHz, DMSO-*d*<sub>6</sub>) δ 0.85 (3H, t, *J* = 6.4 Hz, CH<sub>3</sub>), 1.19–1.33 (11H, m, 5 × CH<sub>2</sub>, H10s), 1.50–1.61 (3H, m, CHCH<sub>2</sub>, H10a), 2.40 (1H, d, *J* = 5.5 Hz, H1), 2.45 (1H, br s, H7), 2.54 (1H, br s, H9), 3.0 (1H, dd, *J* = 4.8, 0.6 Hz, H8), 3.88 (1H, d, *J* = 5.6 Hz, H6), 3.97 (2H, d, *J* = 5.6 Hz, H2), 4.62 (1H, t, *J* = 4.7 Hz, H4).

<sup>13</sup>C NMR (67.5 MHz, CDCl<sub>3</sub>) δ 14.0, 22.1, 23.7, 28.6, 28.9, 31.2 (2 × C), 32.3, 42.6, 43.3, 44.4, 45.0, 78.2, 80.7, 103.2, 173.3, 174.6.

HRMS (ESI, *m/z*) for C<sub>17</sub>H<sub>26</sub>O<sub>6</sub> [M + Na]<sup>+</sup> calc. 349.1622; found 349.1627.

#### 4-Hexadecyl-3,5-dioxatricyclo[5.2.1.0<sup>2,6</sup>]decane-8-*endo*-9-*exo*-dicarboxylic acid (5c)

[CAS Reg. No. 1233075-00-7]

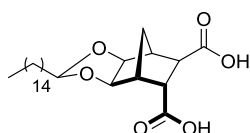

The title compound (**5c**) was prepared from diester **4c** (258 mg, 0.56 mmol) according to general procedure B and isolated as an off-white solid (198 mg, 80%).

m.p: 126.7–133.8 °C (lit. 125.0–127.0 °C).<sup>18</sup>

$^1\text{H}$  NMR (270 MHz, DMSO- $d_6$ )  $\delta$  0.85 (3H, t,  $J$  = 6.2 Hz,  $\text{CH}_3$ ), 1.18–1.23 (27H, m,  $13 \times \text{CH}_2$ , H10s), 1.49–1.62 (3H, m,  $\text{CHCH}_2$ , H10a), 2.40 (1H, d,  $J$  = 5.0 Hz, H1), 2.45 (1H, br s, H7), 2.53 (1H, br s, H9), 3.00 (1H, app. t,  $J$  = 4.9 Hz, H8), 3.89 (1H, d,  $J$  = 5.4 Hz, H6), 3.96 (1H, d,  $J$  = 5.8 Hz, H2), 4.62 (1H, t,  $J$  = 4.7 Hz, H4).

$^{13}\text{C}$  NMR (100 MHz DMSO- $d_6$ )  $\delta$  13.9, 22.1, 23.6, 28.7, 28.9 ( $2 \times \text{C}$ ), 29.0 ( $7 \times \text{C}$ ), 31.2, 31.3, 32.3, 43.6, 43.3, 44.4, 45.0, 78.2, 80.7, 103.2, 173.3, 174.6.

HRMS (ESI,  $m/z$ ) for  $\text{C}_{25}\text{H}_{42}\text{O}_6$   $[\text{M} + \text{Na}]^+$  calc. 461.2874; found 461.2882.

#### 4-[4'-(Octyloxy)phenyl]-3,5-dioxatricyclo[5.2.1.0<sup>2,6</sup>]decane-8-endo-9-exo-dicarboxylic acid (**S18**)

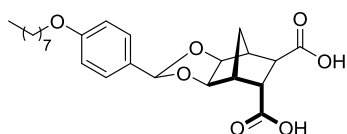

The title compound (**S18**) was prepared from diester **S17** (489.6 mg, 1.06 mmol) according to general procedure B and isolated as a white solid (382 mg, 83%).

m.p: 173.5–178.2 °C.

$^1\text{H}$  NMR (400 MHz, DMSO- $d_6$ )  $\delta$  0.85 (3H, t,  $J$  = 7.0 Hz,  $\text{CH}_3$ ), 1.28–1.46 (11H, m,  $5 \times \text{CH}_2$ , H10s), 1.69 (2H, app. quin,  $J$  = 7.7 Hz,  $\text{CH}_2\text{CH}_2\text{O}$ ), 2.01 (1H, d,  $J$  = 10.3 Hz, H10a), 2.46 (1H, d,  $J$  = 5.3 Hz, H7), 2.57 (1H, br s, H1), 2.65 (1H, d,  $J$  = 4.5 Hz, H9), 3.06 (1H, app. t,  $J$  = 5.1 Hz, H8), 3.97 (2H, t,  $J$  = 6.4 Hz,  $\text{CH}_2$ ), 4.04 (1H, d,  $J$  = 5.6 Hz, H6), 4.13 (1H, d,  $J$  = 5.7 Hz, H2), 5.49 (1H, s, H4), 6.92 (2H, d,  $J$  = 8.6 Hz, ArH), 7.36 (2H, d,  $J$  = 8.6 Hz, ArH).

$^{13}\text{C}$  NMR (125 MHz, DMSO- $d_6$ )  $\delta$  14.0, 22.1, 25.5, 28.6, 28.66, 28.73, 31.23, 42.7, 43.4, 49.5, 45.1, 67.5, 78.5, 80.9, 102.3, 114.1, 127.9, 128.3, 159.6, 173.3, 174.5.

HRMS (ESI,  $m/z$ ) for  $\text{C}_{24}\text{H}_{33}\text{O}_7$   $[\text{M} + \text{H}]^+$  calc. 433.22208; found 433.21908.

#### General procedure C: amide formation

A microwave vial was charged with the appropriate carboxylic acid, EDCI (3.0 equiv), HOBt (0.1 equiv) and anhydrous  $\text{CHCl}_3$  and was stirred at ambient temperature for 30 min. The appropriate alkylamine (3.0 equiv) was then added and the reaction was heated at 50 °C for 30 min using microwave irradiation. The resulting homogenous clear solution was diluted with  $\text{CHCl}_3$  (20 mL), washed with  $\text{H}_2\text{O}$  ( $2 \times 10$  mL), brine (8 mL), dried ( $\text{MgSO}_4$ ), filtered, and concentrated *in vacuo* to afford the crude material that was purified by column chromatography (as specified below) to give the title compound.

**8-endo-9-exo-Di[2'-(2'',3''-bis-*tert*-butoxycarbonylguanidino)ethylcarbamoyl]-4-exo-[4'-(Octyloxy)phenyl]-3,5-dioxatricyclo[5.2.1.0<sup>2,6</sup>]decane (S19a)**

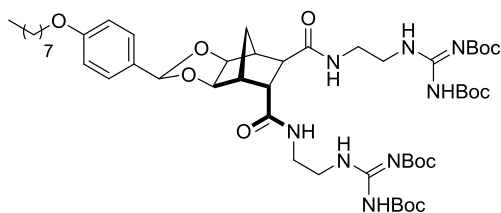

**8-endo-9-exo-Di[2'-(2'',3''-bis-*tert*-butoxycarbonylguanidino)ethylcarbamoyl]-4-endo-[4'-(Octyloxy)phenyl]-3,5-dioxatricyclo[5.2.1.0<sup>2,6</sup>]decane (S19b)**

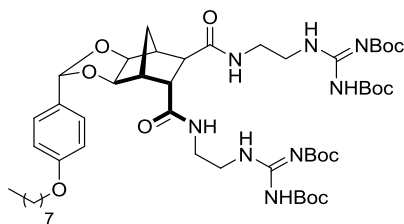

Compounds **S19a** and **S19b** were prepared from diacid **S18** (181 mg, 0.418 mmol) and amine **11** (380 mg, 1.25 mmol) according to general procedure C and after purification by column chromatography (50–70% EtOAc in pet. spirits) were each isolated as white solids (**S19a**; 182 mg, 36% and **S19b**; 21 mg, 5%).

**S19a**

$R_f$  = 0.22 (70% EtOAc in pet. spirits).

<sup>1</sup>H NMR (500 MHz, CDCl<sub>3</sub>)  $\delta$  0.87 (3H, t,  $J$  = 6.3 Hz, CH<sub>3</sub>), 1.25–1.32 (10H, m, 5  $\times$  CH<sub>2</sub>), 1.47–1.48 (36H, m, 4  $\times$  *t*-Bu), 1.62 (1H, d,  $J$  = 10.7 Hz, H10<sub>s</sub>), 1.73–1.78 (2H, m, CH<sub>2</sub>), 1.98 (1H, d,  $J$  = 10.4 Hz, H10<sub>a</sub>), 2.52 (1H, d,  $J$  = 5.5 Hz, H1), 2.67 (1H, br s, H7), 2.79 (1H, d,  $J$  = 4.0 Hz, H9), 3.01 (1H, app. t,  $J$  = 5.1 Hz, H8), 3.34–3.59 (8H, m, 4  $\times$  CH<sub>2</sub>), 3.94 (2H, t,  $J$  = 6.6 Hz, CH<sub>2</sub>), 4.12 (1H, d,  $J$  = 5.7 Hz, H2), 4.20 (1H, t,  $J$  = 5.8 Hz, H6), 5.48 (1H, s, H4), 6.84–6.88 (3H, m, ArH, NH), 7.37 (2H, d,  $J$  = 8.5 Hz, ArH), 8.04 (1H, t,  $J$  = 4.2 Hz, NH), 8.50 (1H, t,  $J$  = 5.6 Hz, NH), 8.63 (1H, t,  $J$  = 5.9 Hz, NH), 11.44 (1H, s, NH), 11.47 (1H, s, NH).

<sup>13</sup>C NMR (125 MHz, CDCl<sub>3</sub>)  $\delta$  14.2, 22.8, 26.1, 28.2, 28.4, 29.3 (2  $\times$  C), 29.4, 31.9, 32.7, 40.0, 40.1, 40.2, 42.2, 43.3, 44.3, 44.8, 47.7, 68.2, 79.3, 79.6, 79.9, 81.9, 83.4, 83.7, 103.2, 114.4 (2  $\times$  C), 128.1, 128.2, 153.2 (2  $\times$  C), 157.1, 157.9, 160.2, 163.0, 163.5, 171.9, 174.1.

HRMS (ESI,  $m/z$ ) for C<sub>50</sub>H<sub>80</sub>N<sub>8</sub>O<sub>13</sub> [M + H]<sup>+</sup> calc. 1001.5918; found 1001.5955.

**S19b**

$R_f$  = 0.41 (70% EtOAc in pet. spirits).

$^1\text{H}$  NMR (500 MHz,  $\text{CDCl}_3$ )  $\delta$  0.88 (3H, t,  $J = 7.1$  Hz,  $\text{CH}_3$ ), 1.25–1.45 (10H, m,  $5 \times \text{CH}_2$ ), 1.49–1.52 (36H, m, *t*-Bu), 1.60–1.62 (1H, m, H10s), 1.73–1.79 (2H, m,  $\text{CH}_2$ ), 1.89 (1H, d,  $J = 9.7$  Hz, H10a), 2.43 (1H, d,  $J = 5.4$  Hz, H1), 2.64 (1H, br s, H7), 2.77 (1H, d,  $J = 4.1$  Hz, H9), 2.96 (1H, app. t,  $J = 4.7$  Hz, H8), 3.29–3.58 (8H, m,  $4 \times \text{CH}_2$ ), 3.92 (2H, t,  $J = 6.6$  Hz,  $\text{CH}_2$ ), 4.06 (1H, d,  $J = 5.5$  Hz, H2), 4.12 (1H, t,  $J = 5.6$  Hz, H6), 6.15 (1H, s, H4), 6.84–6.84 (2H, m, ArH), 6.99 (1H, t,  $J = 5.1$  Hz, NH), 7.25–7.27 (2H, m, ArH), 8.09 (1H, t,  $J = 4.1$  Hz, NH), 8.51 (1H, t,  $J = 5.7$  Hz, NH), 8.64 (1H, t,  $J = 6.0$  Hz, NH), 11.48 (1H, s, NH), 11.49 (1H, s, NH).

$^{13}\text{C}$  NMR (125 MHz,  $\text{CDCl}_3$ )  $\delta$  14.3, 22.8, 26.2, 28.2, 28.4, 29.4 ( $2 \times \text{C}$ ), 29.5, 32.0, 32.8, 40.1, 40.2, 40.3, 42.4, 43.5, 44.2, 45.0, 47.7, 68.2, 78.8, 79.7, 80.0, 81.6, 83.5, 83.8, 104.6, 114.4 ( $2 \times \text{C}$ ), 127.1 ( $2 \times \text{C}$ ), 132.2, 153.3 ( $2 \times \text{C}$ ), 157.2, 158.0, 159.4, 163.0, 163.5, 171.9, 174.1.

HRMS (ESI,  $m/z$ ) for  $\text{C}_{50}\text{H}_{80}\text{N}_8\text{O}_{13}$   $[\text{M} + \text{H}]^+$  calc. 1001.5918; found 1001.5955.

#### General procedure D: amidation of diacids.

A microwave vial was charged with the appropriate carboxylic acid, EDCI (1.5 equiv), HOBt (0.05 equiv) and dry DMF and was stirred at ambient temperature for 30 min. The appropriate alkylamine (1.5 equiv) was then added and the reaction was irradiated to 50 °C for 30 min. The resulting homogenous mixture was diluted with EtOAc (15 mL), washed with  $\text{H}_2\text{O}$  ( $3 \times 8$  mL), brine (8 mL), dried ( $\text{MgSO}_4$ ), filtered, and concentrated *in vacuo* to afford a solid that was purified by column chromatography (as specified below) which gave the title compound.

#### 8-endo-9-exo-Di[2'-(2'',3''-bis-*tert*-butoxycarbonylguanidino)ethylcarbamoyl]-4-pentadecyl-3,5-dioxatricyclo[5.2.1.0<sup>2,6</sup>]decane (**9c**)

[CAS Reg. No. 1233075-01-8]

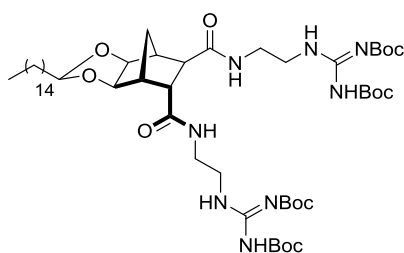

Compound **9c** was prepared from diacid **5c** (69 mg, 0.16 mmol) and amine **11** (140 mg, 0.47 mmol) according to general procedure D and after purification by column chromatography (20–70% EtOAc in pet. spirits) was isolated as a clear oil (117 mg, 74%).

$R_f = 0.47$  (70% EtOAc in pet. spirits).

$^1\text{H}$  NMR (500 MHz,  $\text{CDCl}_3$ )  $\delta$  0.87 (3H, t,  $J$  = 6.8 Hz,  $\text{CH}_3$ ), 1.24–1.39 (27H, m,  $13 \times \text{CH}_2$ ,  $\text{H}_{10s}$ ), 1.49–1.50 (36H, m, *t*-Bu), 1.58–1.62 (2H, m,  $\text{CHCH}_2$ ), 1.78 (1H, d,  $J$  = 9.6 Hz,  $\text{H}_{10a}$ ), 2.44 (1H, d,  $J$  = 5.6 Hz,  $\text{H}_1$ ), 2.57 (1H, br s,  $\text{H}_7$ ), 2.70 (1H, d,  $J$  = 5.4 Hz,  $\text{H}_9$ ), 2.94 (1H, app. t,  $J$  = 5.3 Hz,  $\text{H}_8$ ), 3.34–3.44 (4H, m,  $2 \times \text{CH}_2$ ), 3.52–3.58 (4H, m,  $2 \times \text{CH}_2$ ), 3.95 (1H, d,  $J$  = 5.7 Hz,  $\text{H}_2$ ), 4.03 (1H, d,  $J$  = 5.6 Hz,  $\text{H}_6$ ), 4.61 (1H, t,  $J$  = 4.8 Hz,  $\text{H}_7$ ), 6.87 (1H, t,  $J$  = 5.2 Hz, NH), 8.00 (1H, t,  $J$  = 4.2 Hz, NH), 8.50 (1H, t,  $J$  = 5.7 Hz, NH), 8.63 (1H, t,  $J$  = 6.1 Hz, NH), 11.45 (1H, s, NH), 11.47 (1H, s, NH).

$^{13}\text{C}$  NMR (125 MHz,  $\text{CDCl}_3$ )  $\delta$  14.3, 22.8, 24.4, 28.2, 28.4, 29.5, 29.7 ( $3 \times \text{C}$ ), 29.8 ( $6 \times \text{C}$ ), 32.1, 32.5, 33.0, 40.0, 40.1, 40.2, 42.2, 43.0, 44.3, 44.4, 47.8, 79.0, 79.7, 79.9, 81.7, 83.4, 83.7, 104.1, 153.2 ( $2 \times \text{C}$ ), 157.1, 157.9, 163.0, 163.5, 172.1, 174.2.

HRMS (ESI,  $m/z$ ) for  $\text{C}_{51}\text{H}_{90}\text{N}_8\text{O}_{12}$  [ $\text{M} + \text{H}$ ] $^+$  calc. 1007.6751; found 1007.6771.

### General procedure E: deprotection of Boc groups

To a stirring solution of Boc-protected amine/guanidine and MeOH was added dropwise AcCl (10.0 equiv), and the reaction was stirred for 24 h at ambient temperature (in instances when  $^1\text{H}$  NMR spectroscopy indicated the presence of Boc-groups the crude material was retreated using the aforementioned conditions). The reaction mixture was concentrated under vacuum and co-evaporated with MeOH ( $2 \times 0.5$  mL), to afford the title compound.

### 4-Heptyl-3,5-dioxatricyclo[5.2.1.0<sup>2,6</sup>]decane-8-*endo*-9-*exo*-dicarboxamidoethylamine hydrogen chloride (8a)

[CAS Reg. No. 1233074-99-1]

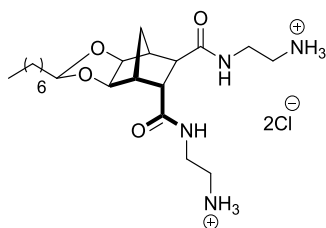

Compound **8a** was synthesised from Boc-protected amine **7a** (650 mg, 1.06 mmol) according to general procedure E as a white solid (510 mg, 99%).

m.p: 243.0–243.4 °C.

$^1\text{H}$  NMR (270 MHz,  $\text{CD}_3\text{OD}$ )  $\delta$  0.90 (3H, t,  $J$  = 6.5 Hz,  $\text{CH}_3$ ), 1.29–1.48 (11H, m,  $5 \times \text{CH}_2$ ,  $\text{H}_{10s}$ ), 1.56–1.64 (2H, m,  $\text{CHCH}_2$ ), 1.75 (1H, d,  $J$  = 9.8 Hz,  $\text{H}_{10a}$ ), 2.51 (1H, br s,  $\text{H}_9$ ), 2.62–2.65 (2H, m,  $\text{H}_1$ ,  $\text{H}_7$ ), 3.03–3.10

(4H, m,  $2 \times \text{CH}_2$ ), 3.23 (1H, app. t,  $J = 4.9$  Hz, H8), 3.35–3.63 (4H, m,  $2 \times \text{CH}_2$ ), 4.00 (1H, d,  $J = 5.7$  Hz, H6), 4.04 (1H, d,  $J = 5.5$  Hz, H2), 4.66 (1H, t,  $J = 4.7$  Hz, H4).

$^{13}\text{C}$  NMR (67.5 MHz,  $\text{CD}_3\text{OD}$ )  $\delta$  14.4, 23.7, 25.2, 28.2, 30.3, 30.6, 32.7, 32.9, 33.9, 38.4, 38.5, 40.8, 44.9, 45.1, 47.1, 47.3, 80.0, 82.8, 105.1, 175.1, 177.0.

HRMS (ESI,  $m/z$ ) for  $\text{C}_{21}\text{H}_{38}\text{N}_4\text{O}_4$   $[\text{M} + 2\text{H}]^{2+}$  calc. 206.1519; found 206.1528.

**4-Pentadecyl-3,5-dioxatricyclo[5.2.1.0<sup>2,6</sup>]decane-8-*endo*-9-*exo*-dicarboxamidoethylguanidine hydrogen 2,2,2-trifluoroacetate (1)**

[CAS Reg. No. 1233075-03-0]

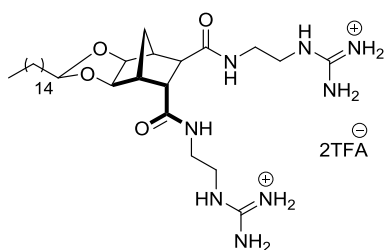

To the stirring solution of Boc-protected guanidine **9c** (58 mg, 0.058 mmol) in  $\text{CH}_2\text{Cl}_2$  (1.2 mL) was added trifluoroacetic acid (420  $\mu\text{L}$ , 5.5 mmol) and the reaction was stirred at ambient temperature for 48 h. The solvent was removed under reduced pressure and the sample was co-evaporated with  $\text{CHCl}_3$  ( $2 \times 1$  mL) and concentrated *in vacuo* to give the title compound (29 mg, 60%) as a yellow resin.

$^1\text{H}$  NMR (500 MHz,  $\text{CD}_3\text{OD}$ )  $\delta$  0.90 (3H, t,  $J = 6.8$  Hz,  $\text{CH}_3$ ), 1.29–1.41 (26H, m,  $13 \times \text{CH}_2$ ) 1.47 (1H, d,  $J = 10.4$  Hz, H10s), 1.54–1.61 (2H, m,  $\text{CHCH}_2$ ), 1.74 (1H, d,  $J = 9.8$  Hz, H10a), 2.44 (1H, br s, H1), 2.60–2.61 (2H, m, H9, H7), 3.21 (1H, t,  $J = 4.7$  Hz, H8), 3.28–3.42 (8H, m,  $4 \times \text{CH}_2$ ), 3.99 (1H, d,  $J = 5.6$  Hz, H2), 4.04 (1H, d,  $J = 5.6$  Hz, H6), 4.56 (1H, t,  $J = 4.7$  Hz, H4).

$^{13}\text{C}$  NMR (125 MHz,  $\text{CD}_3\text{OD}$ )  $\delta$  14.4, 23.7, 25.2, 28.2, 30.5, 30.7 ( $2 \times \text{C}$ ), 30.75 ( $4 \times \text{C}$ ), 30.77 ( $2 \times \text{C}$ ), 32.7, 33.1, 33.9, 39.6, 39.7, 41.9 ( $2 \times \text{C}$ ), 44.9, 45.1, 46.8, 47.7, 79.9, 82.9, 105.1, 158.9 ( $2 \times \text{C}$ ), 174.7, 176.6.

HRMS (ESI,  $m/z$ ) for  $\text{C}_{35}\text{H}_{48}\text{N}_6\text{O}_4\text{S}_2$   $[\text{M} + \text{H}]^+$  calc. 681.3251; found 681.3251.



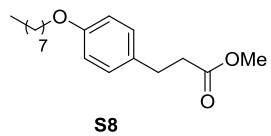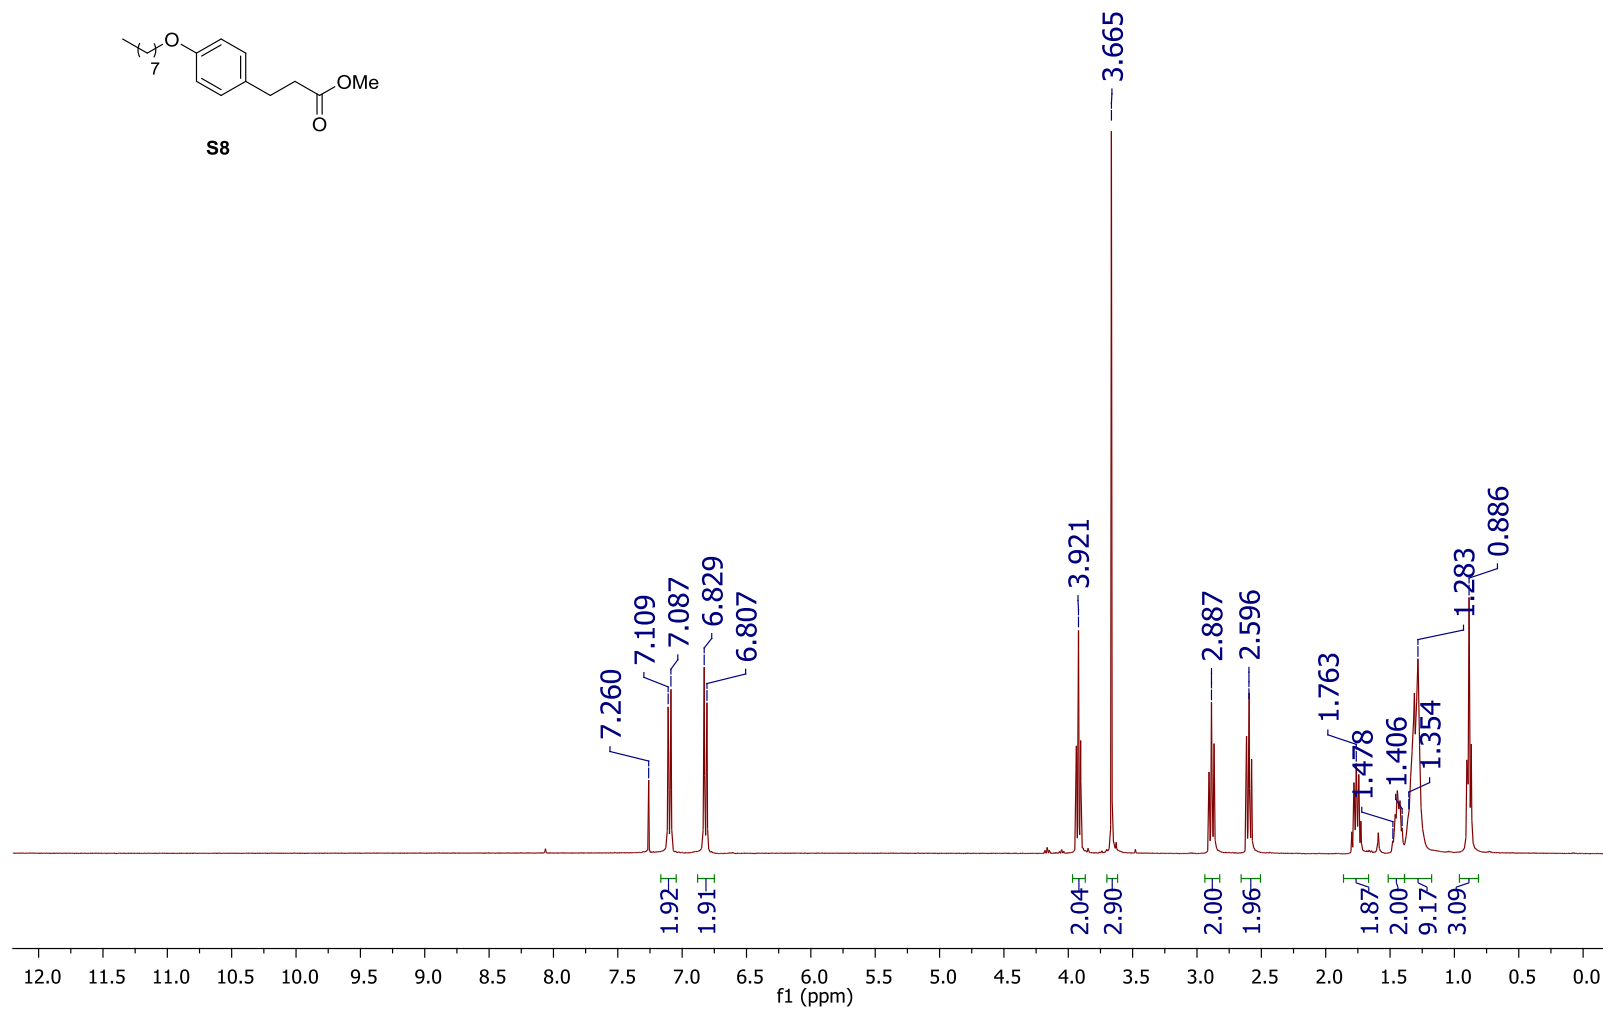

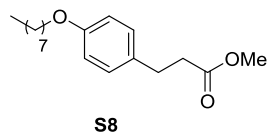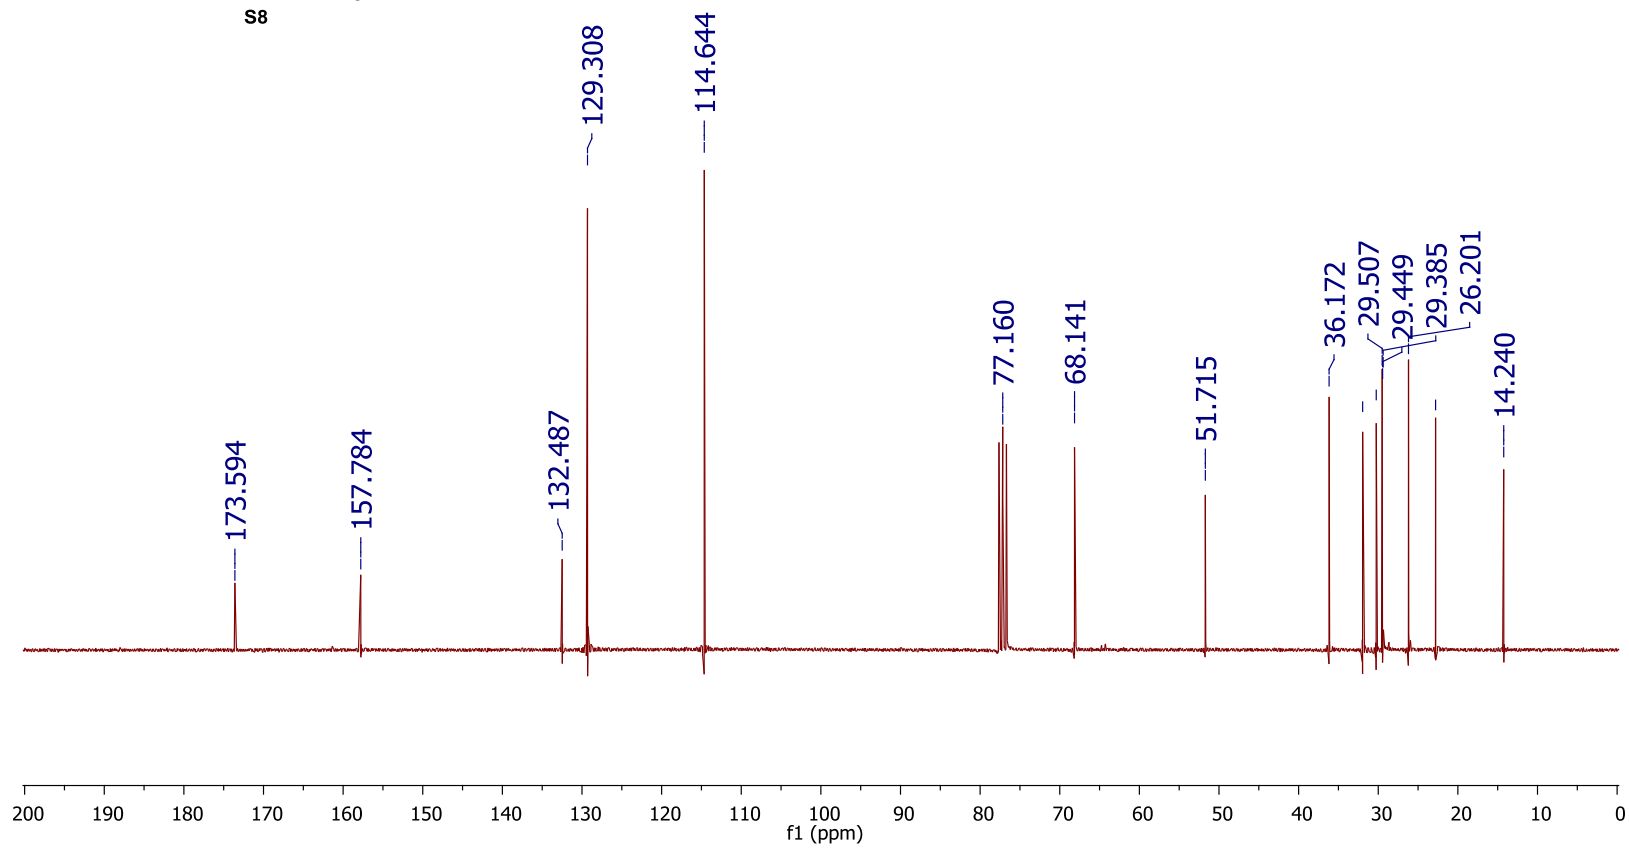

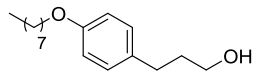

S9

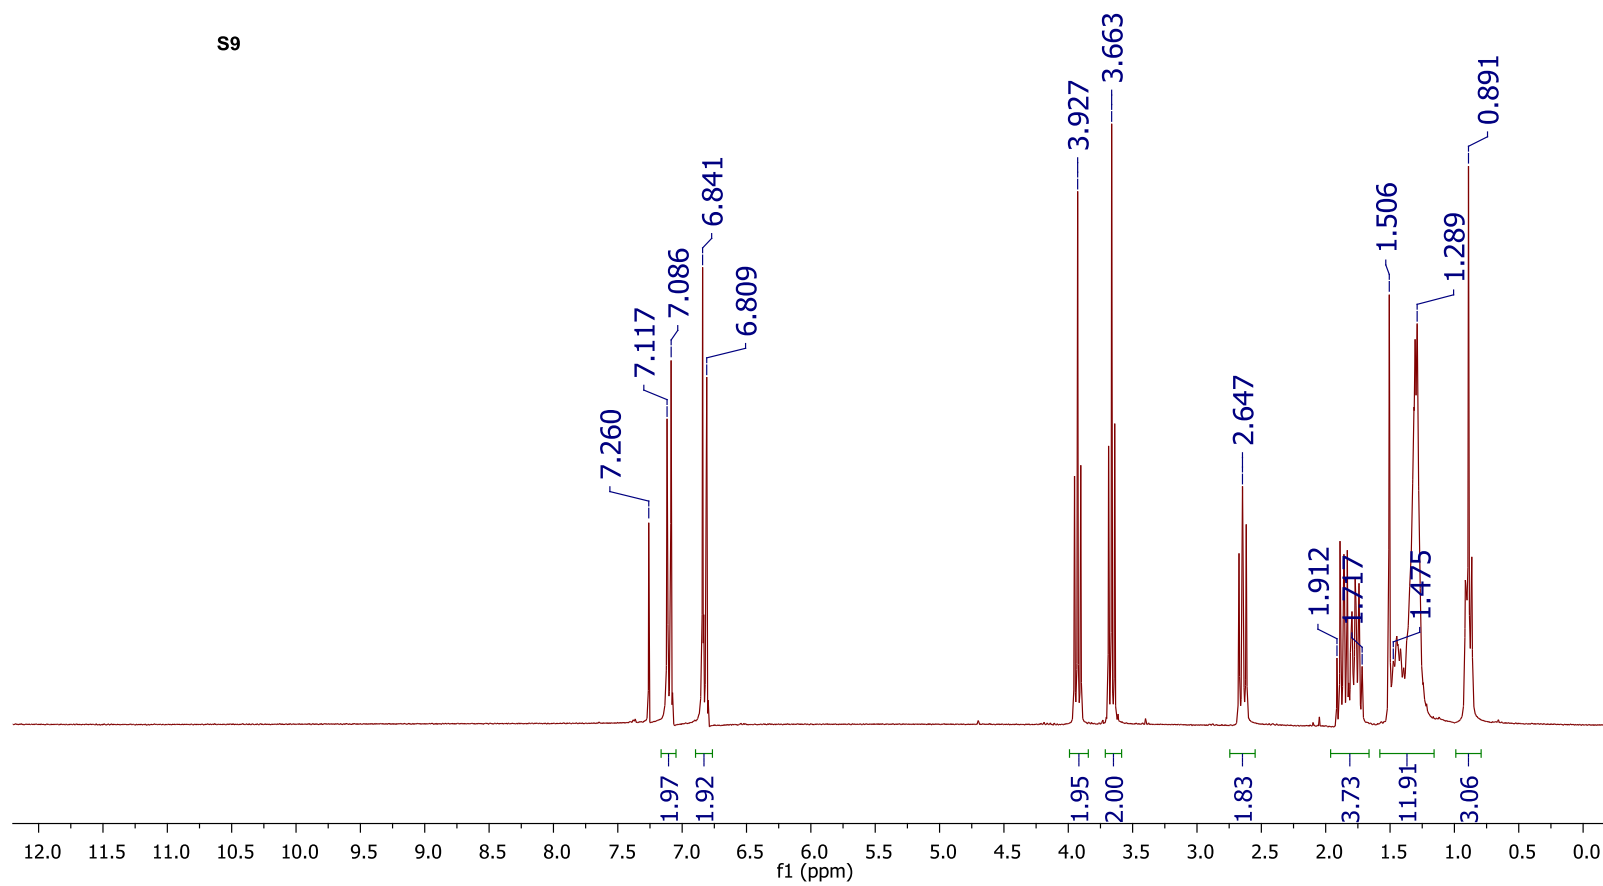

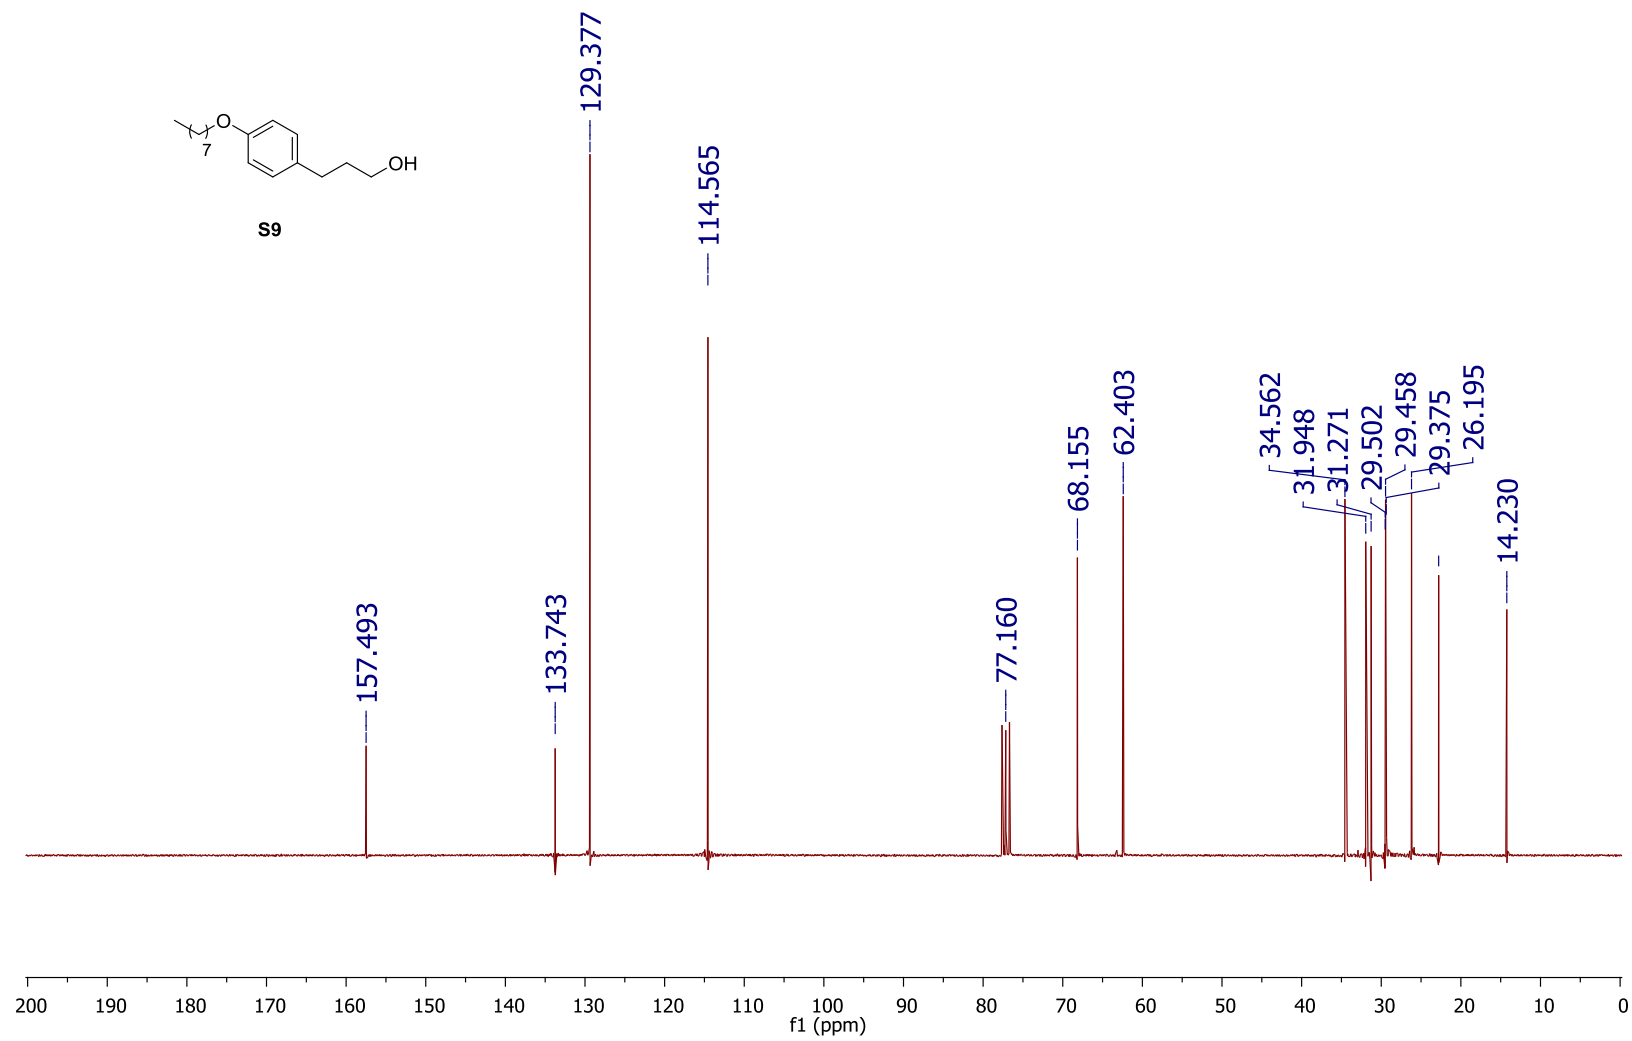

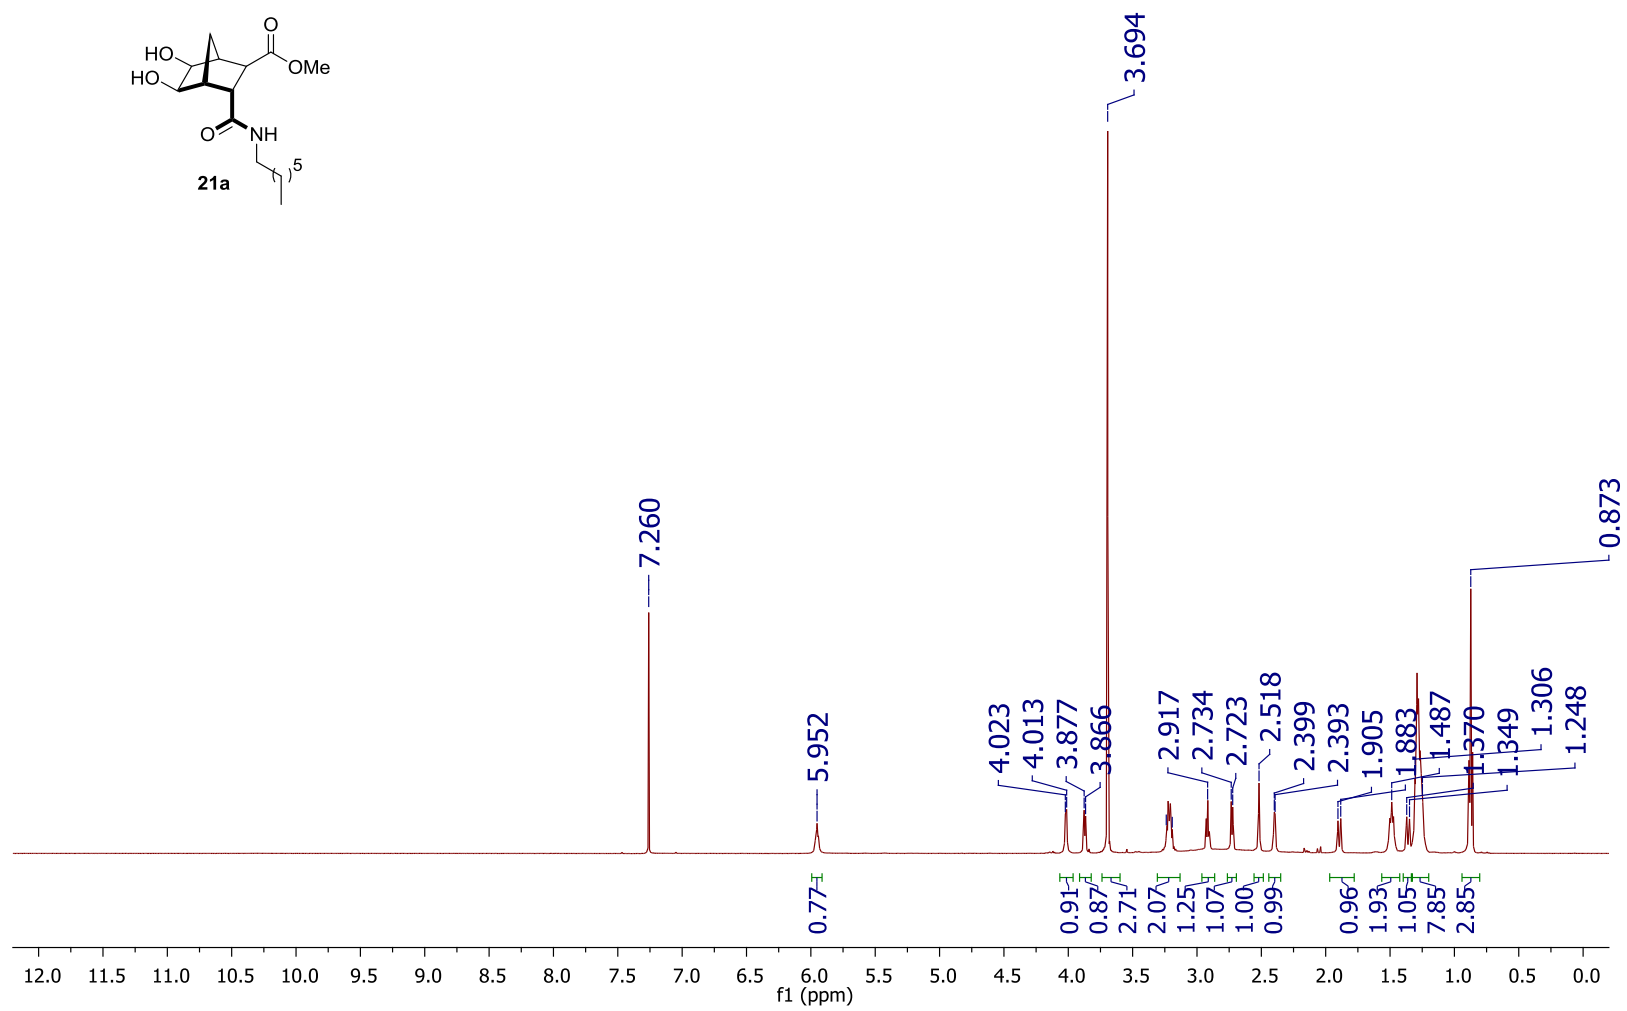

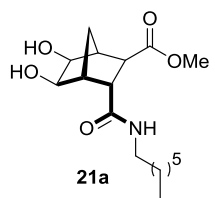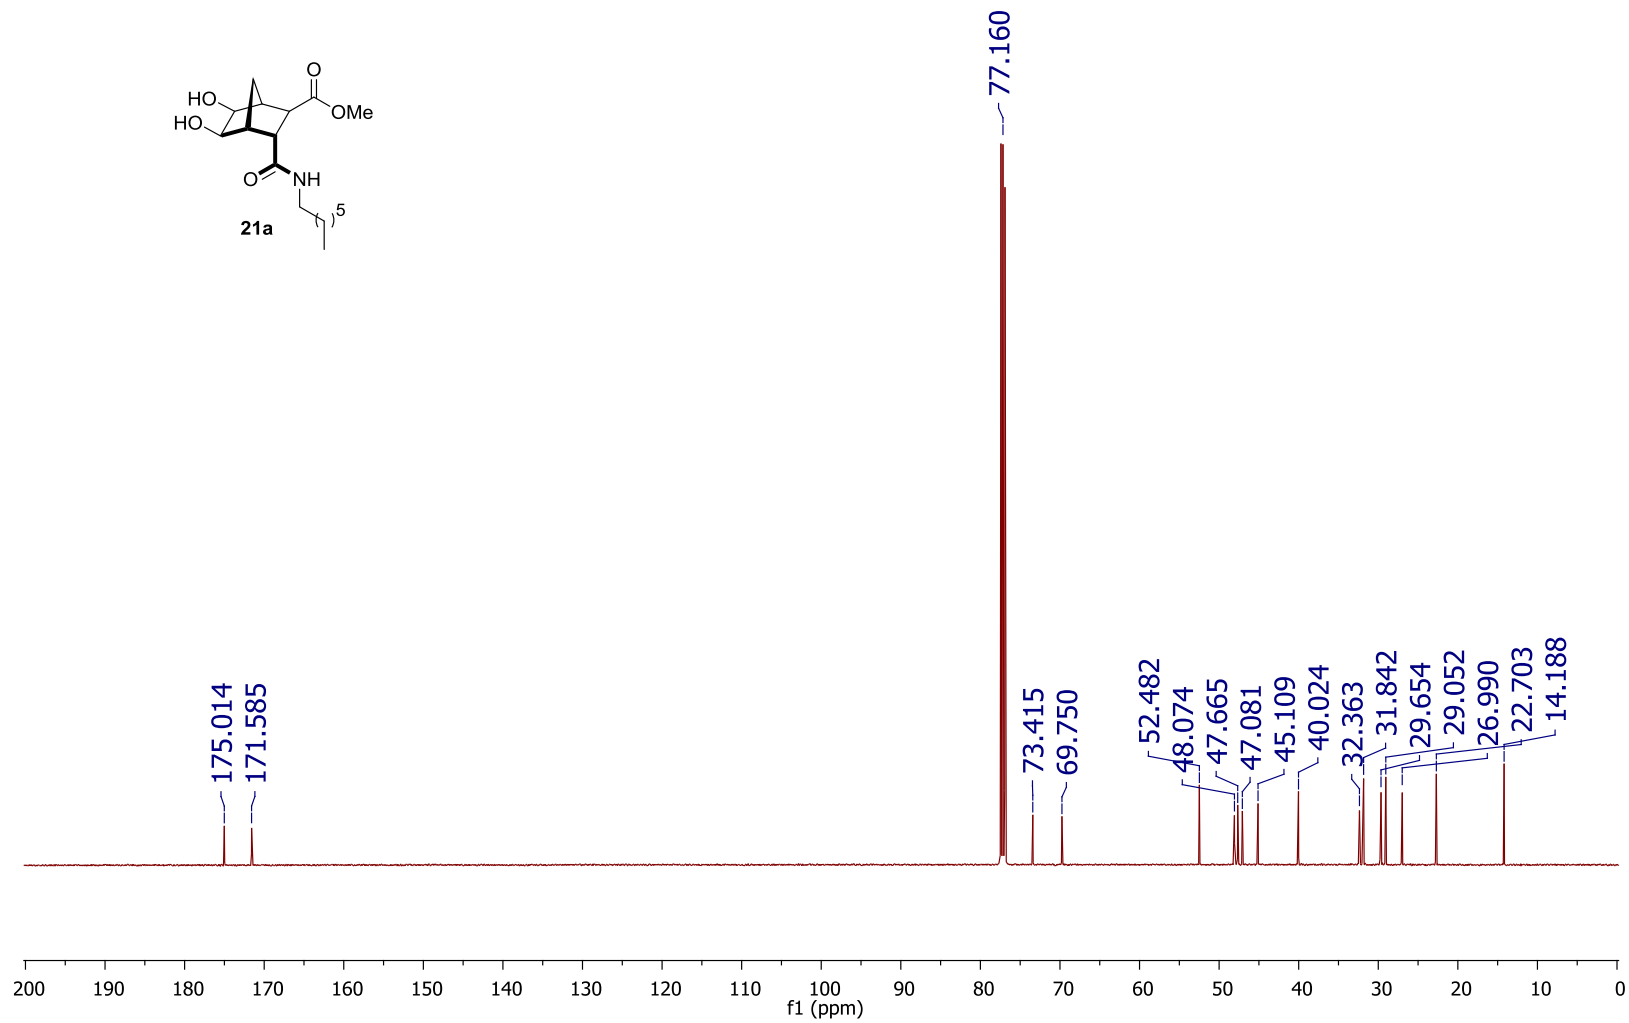

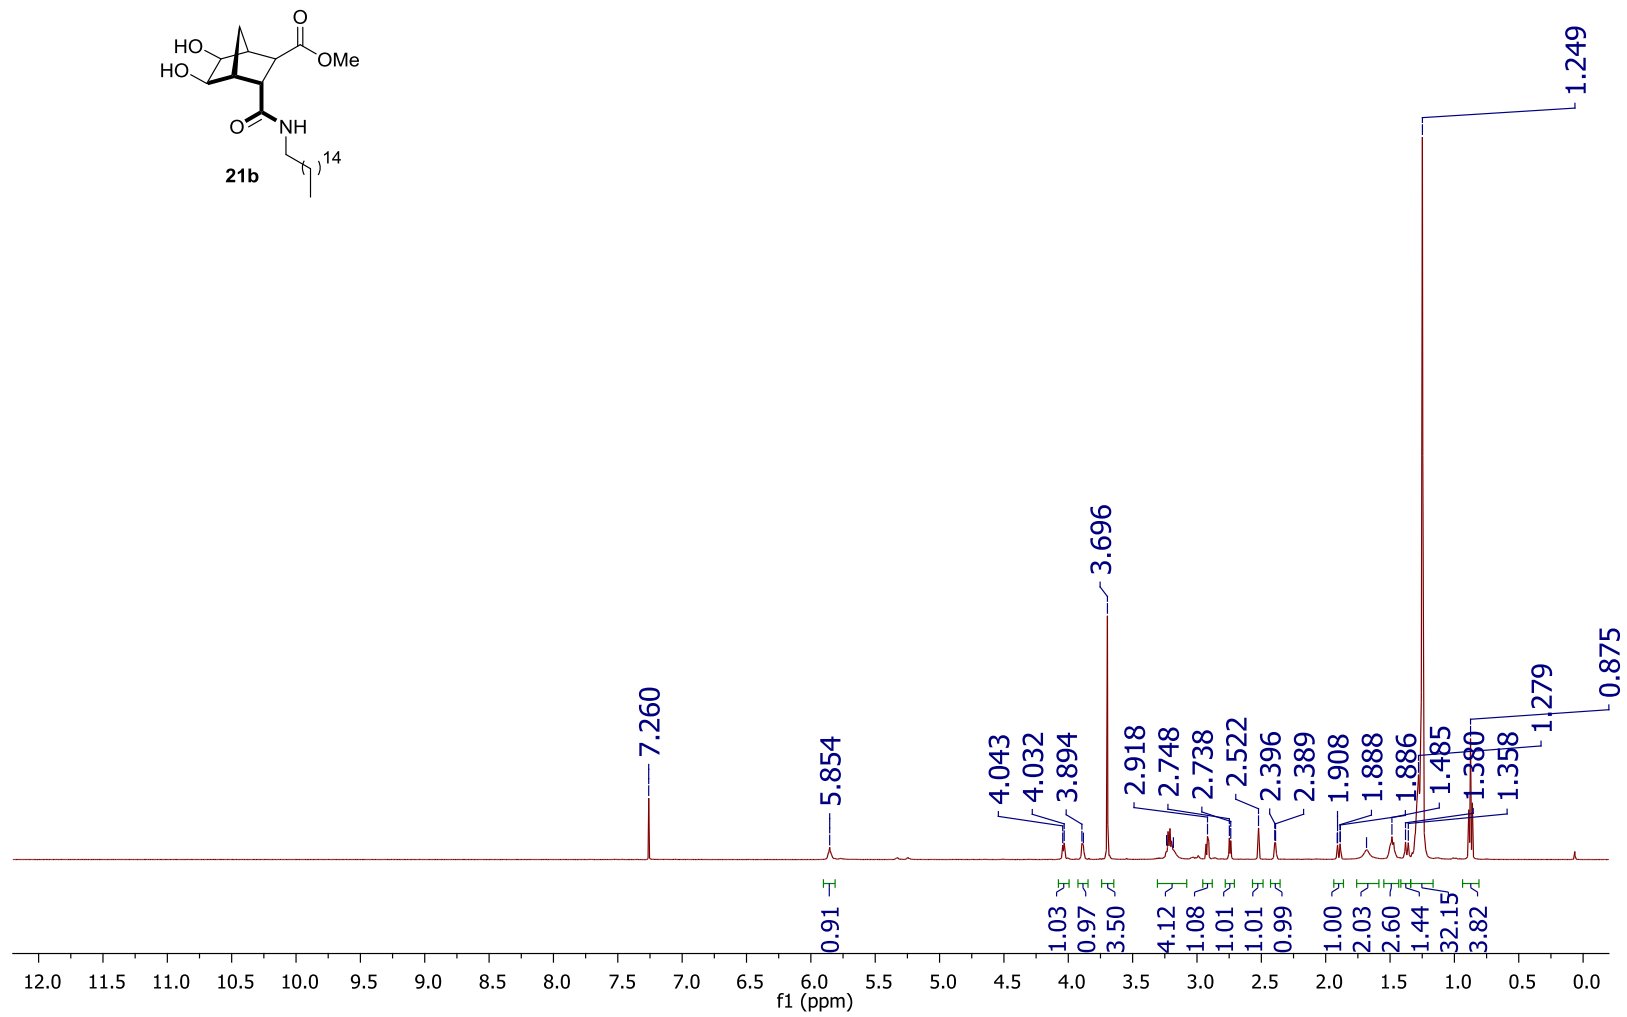

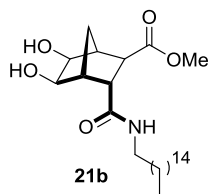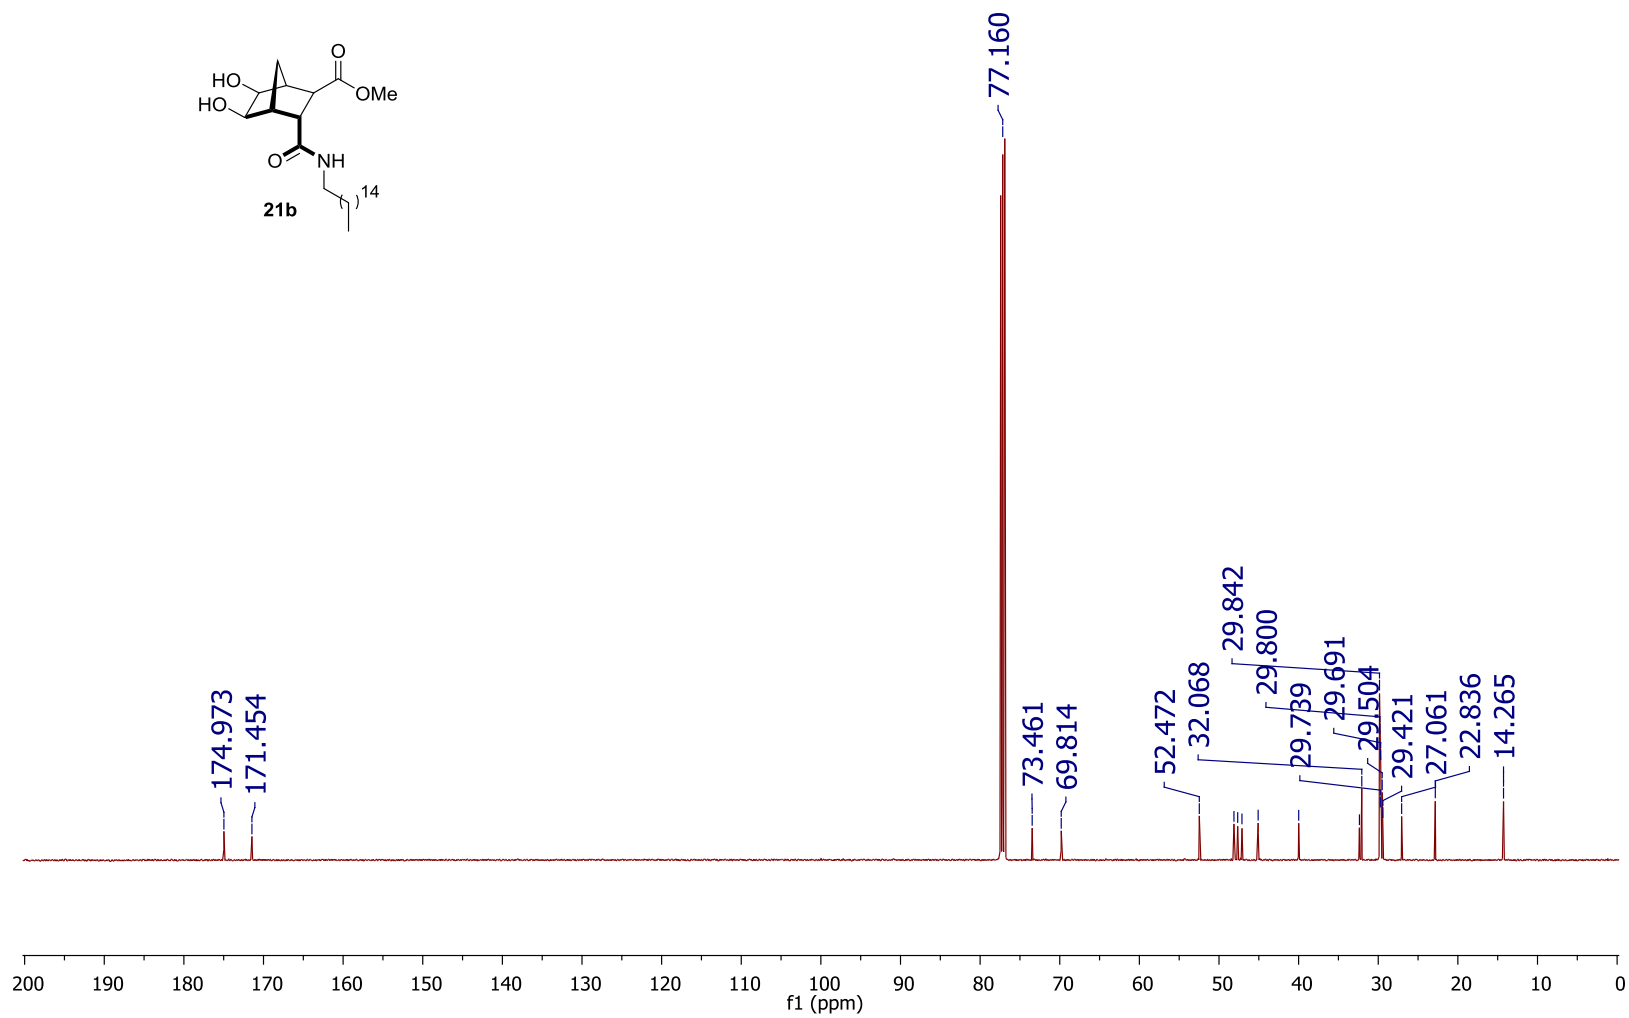

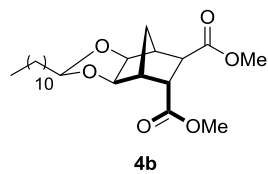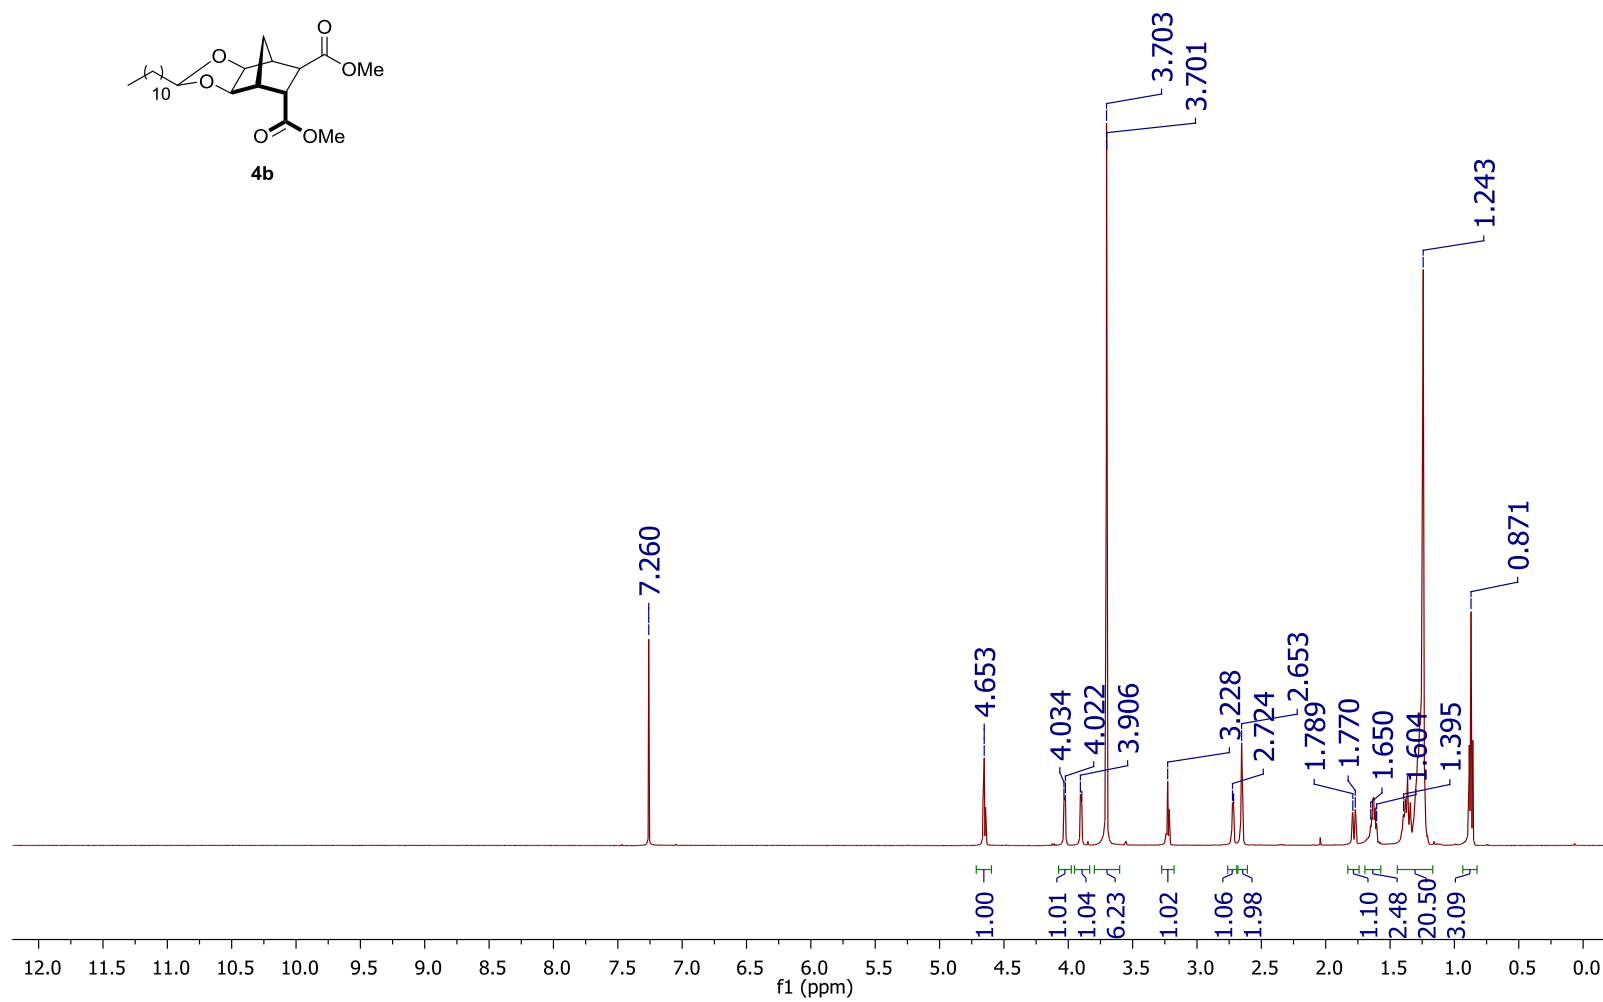

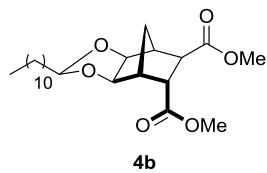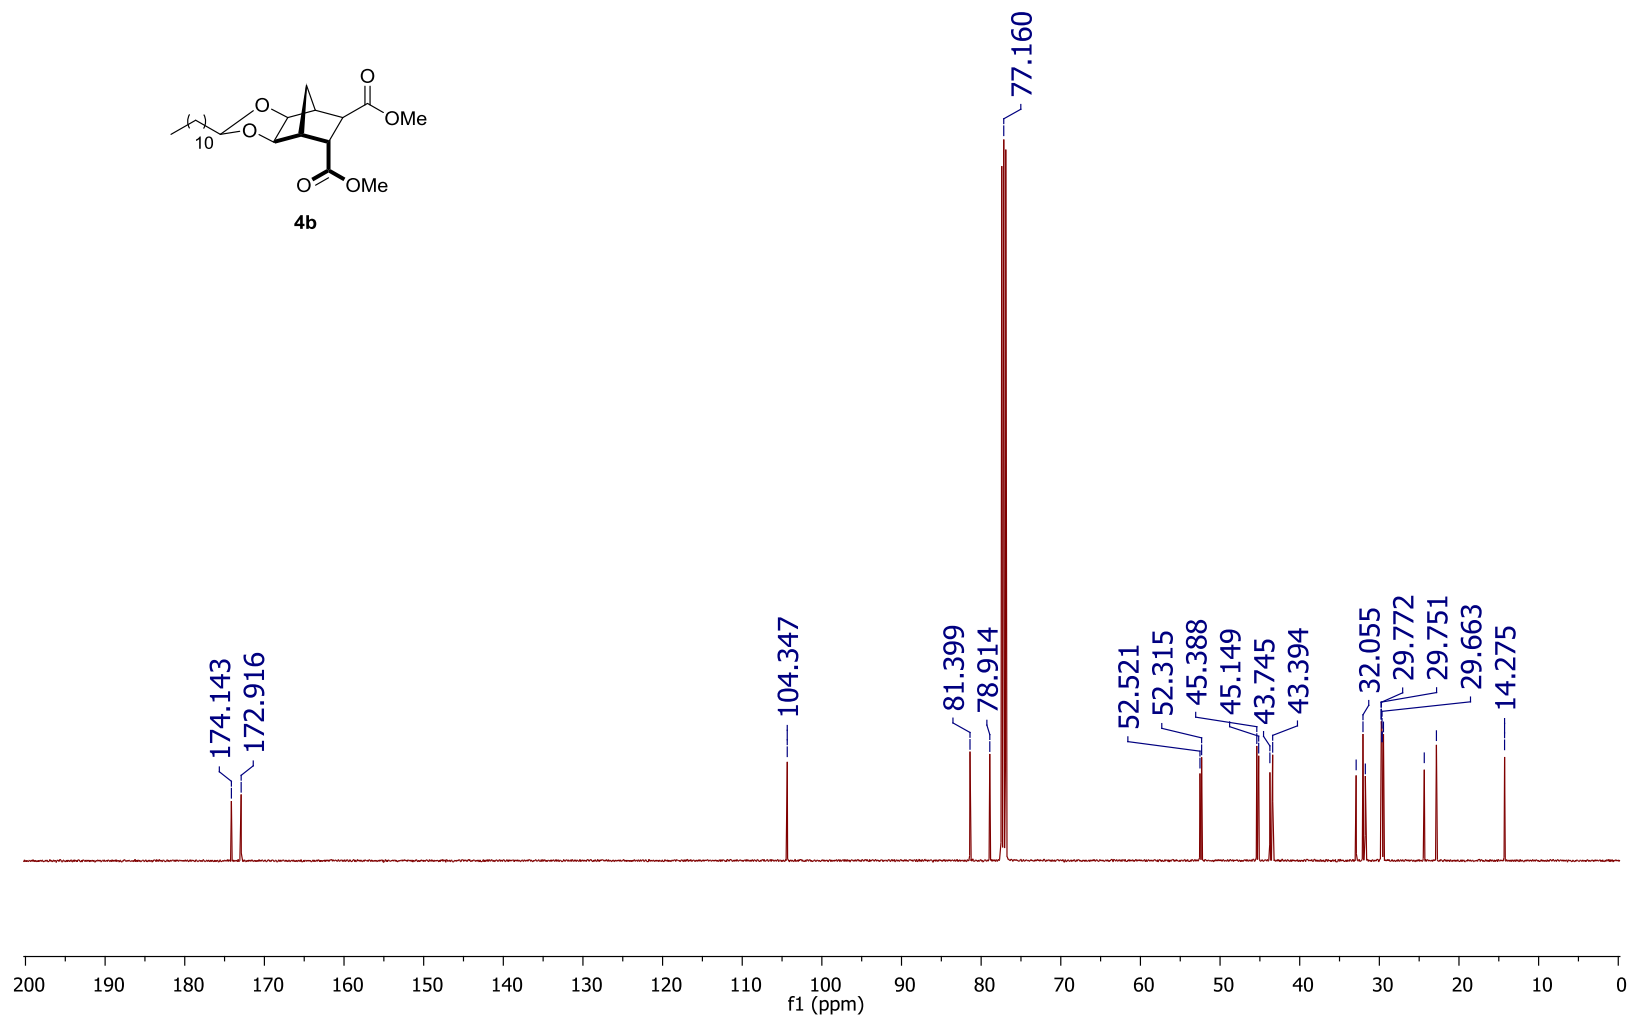

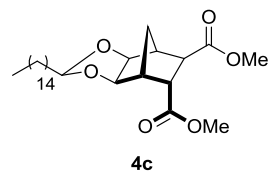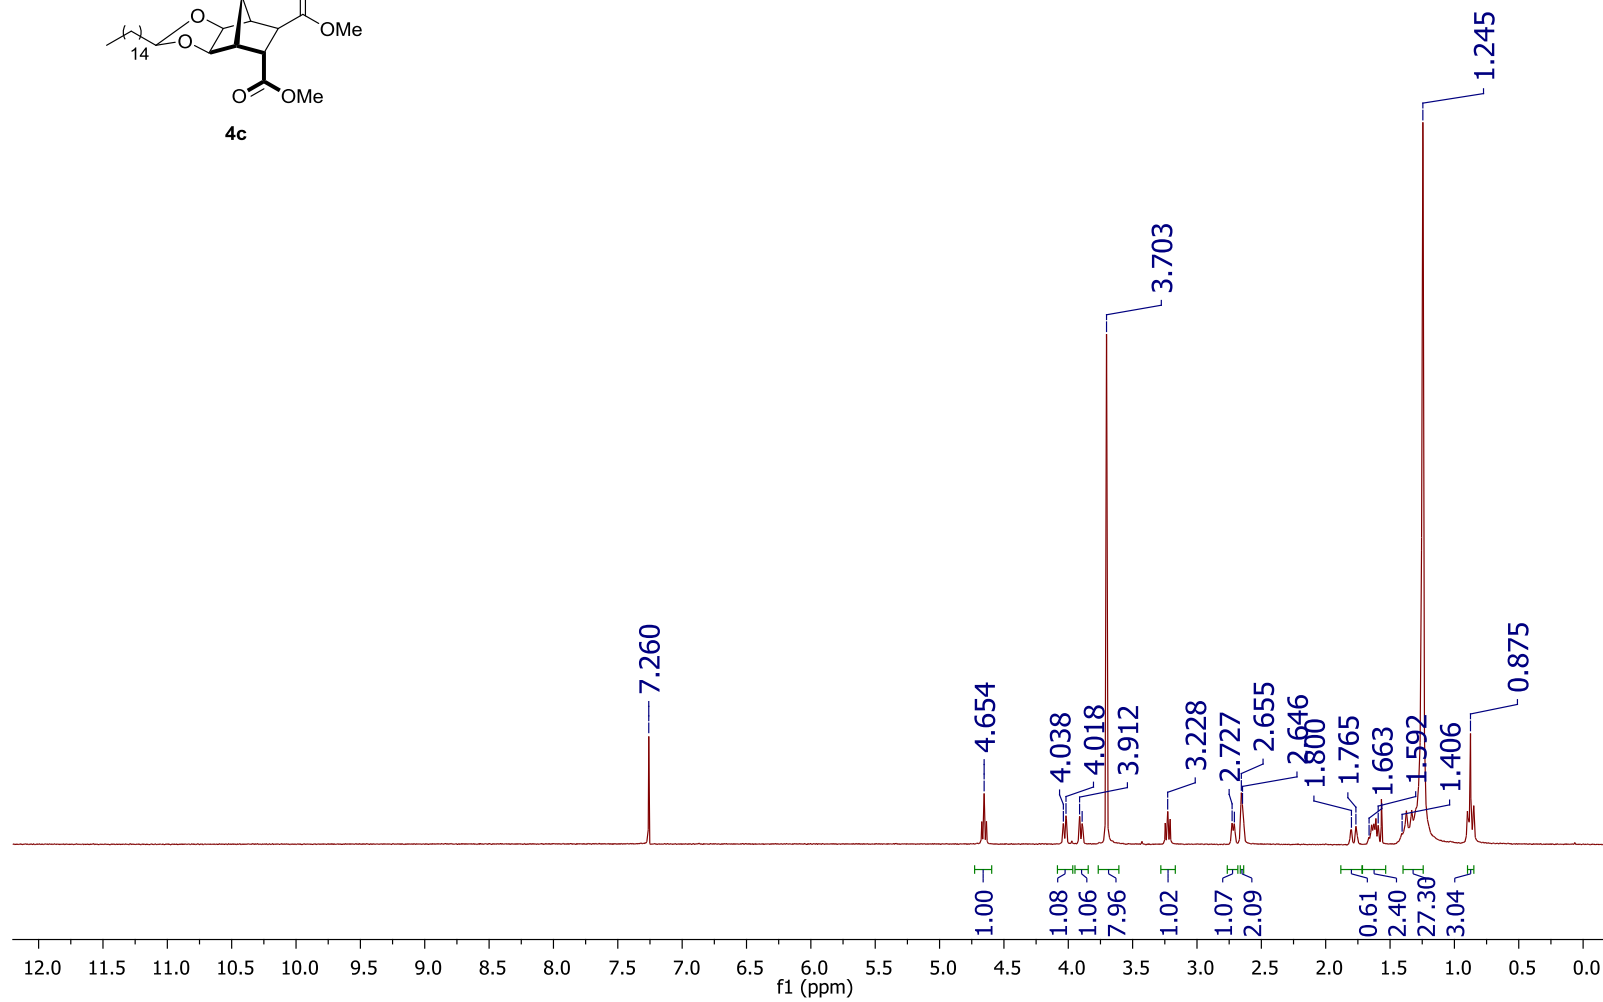

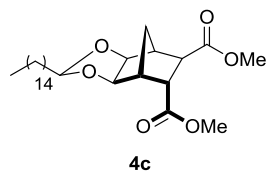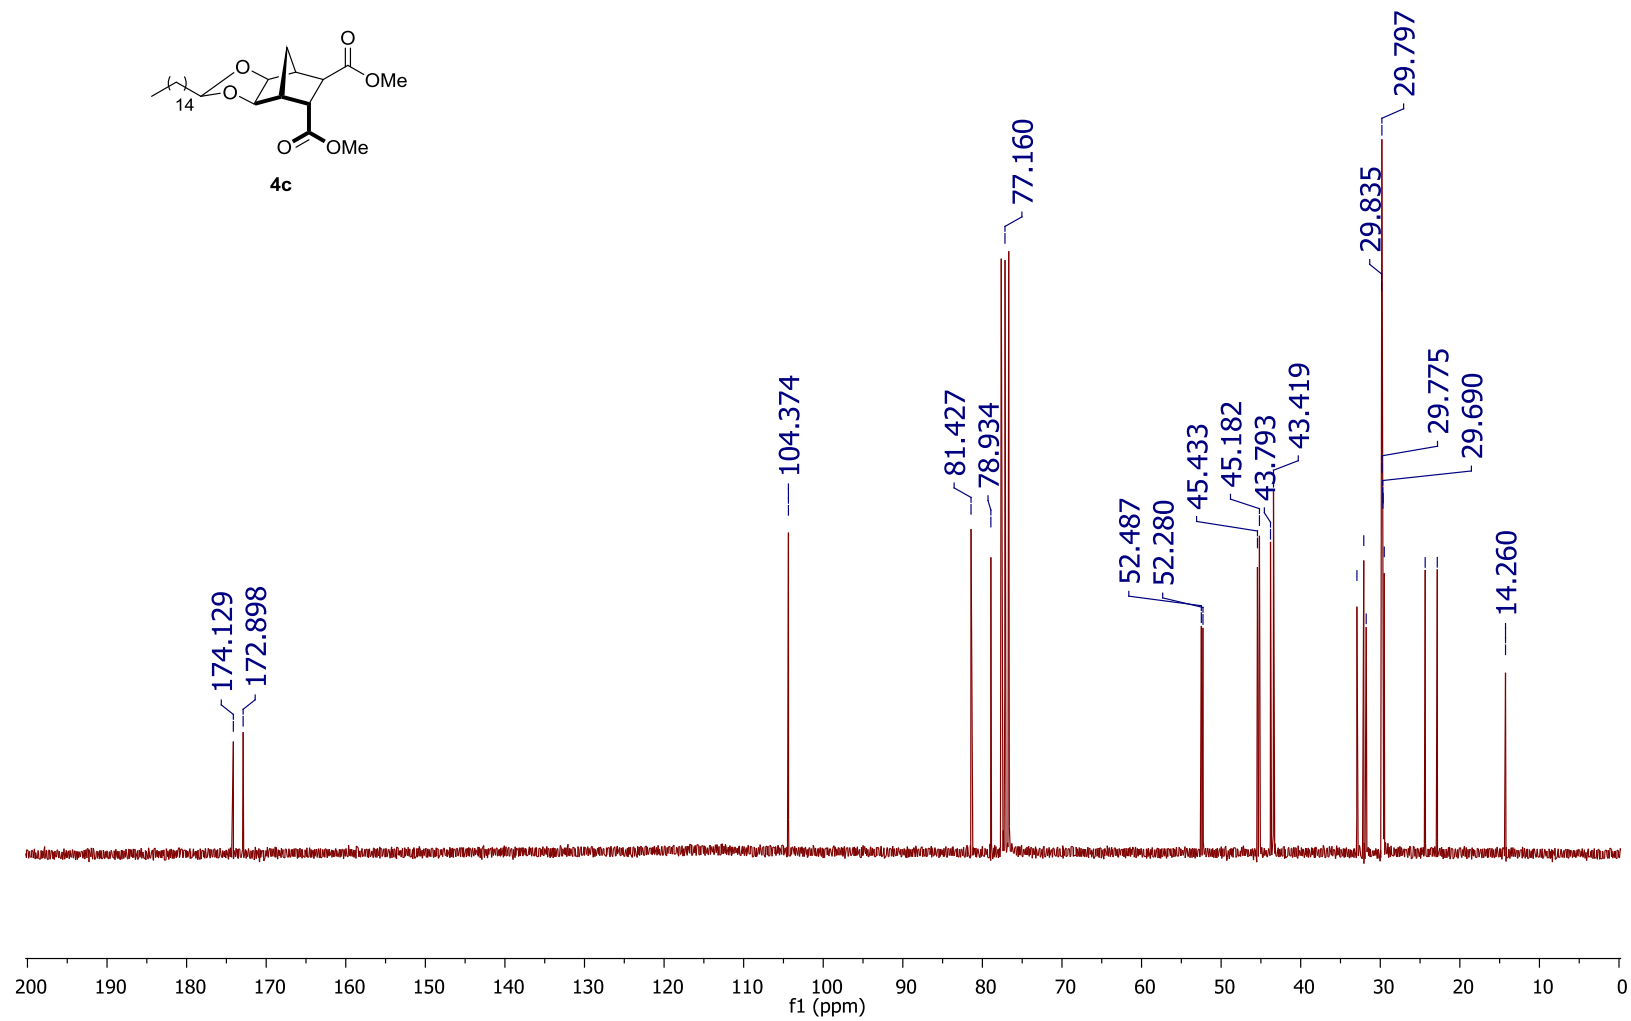

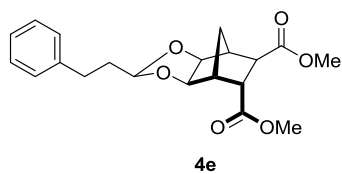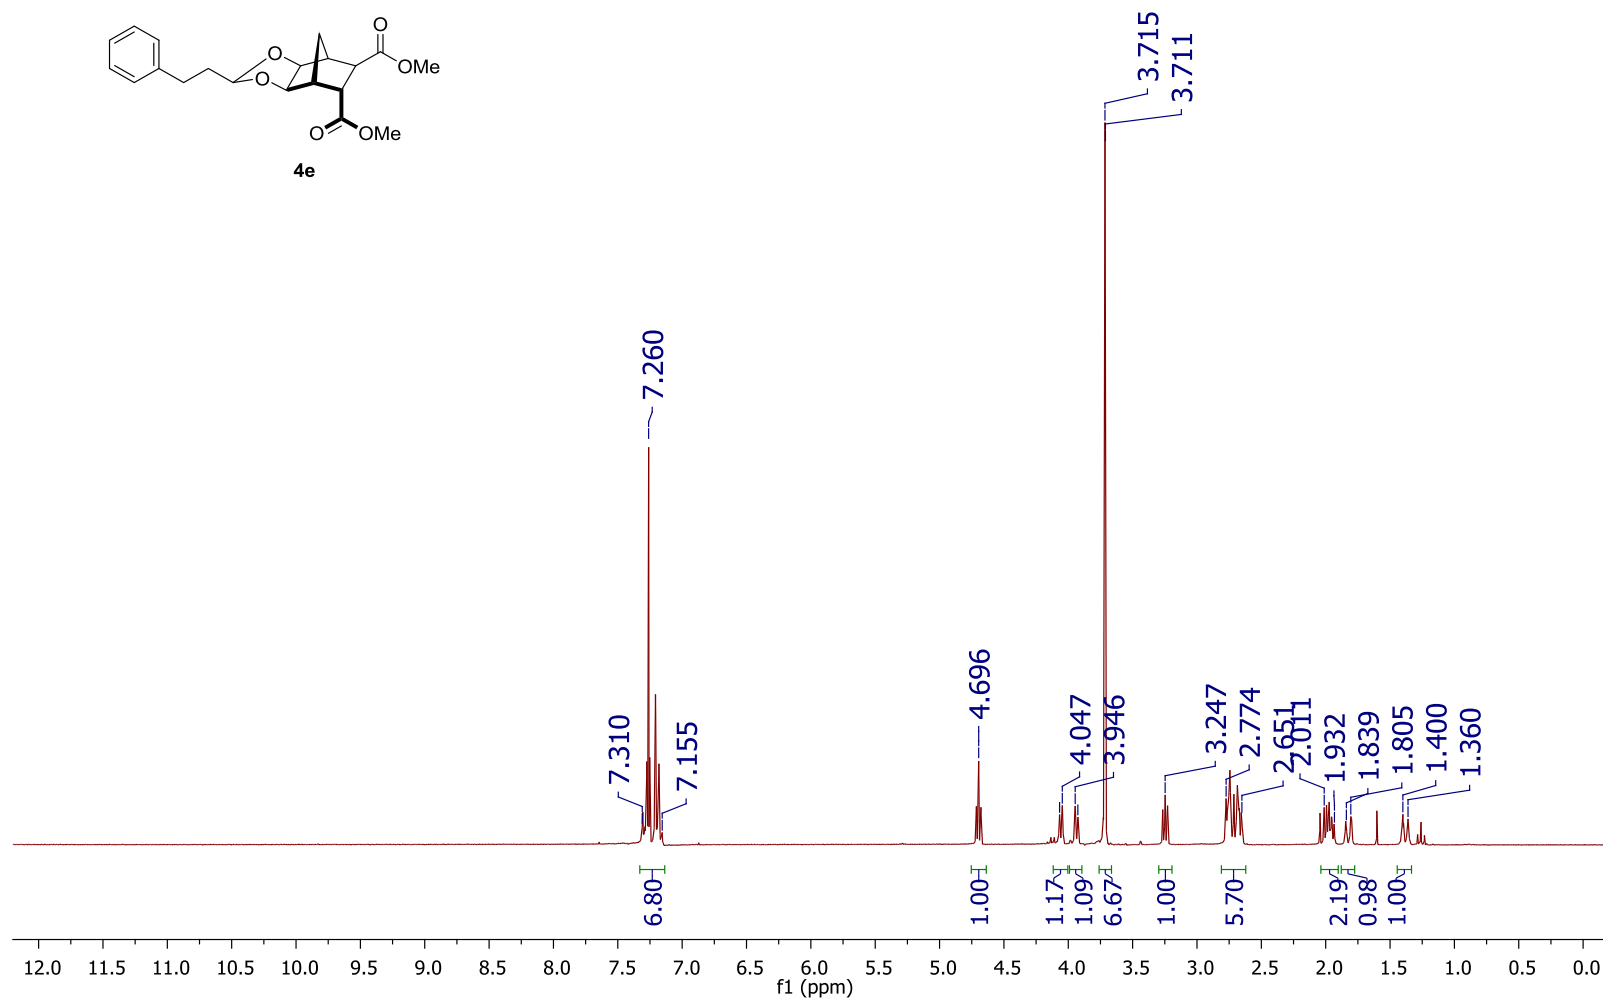

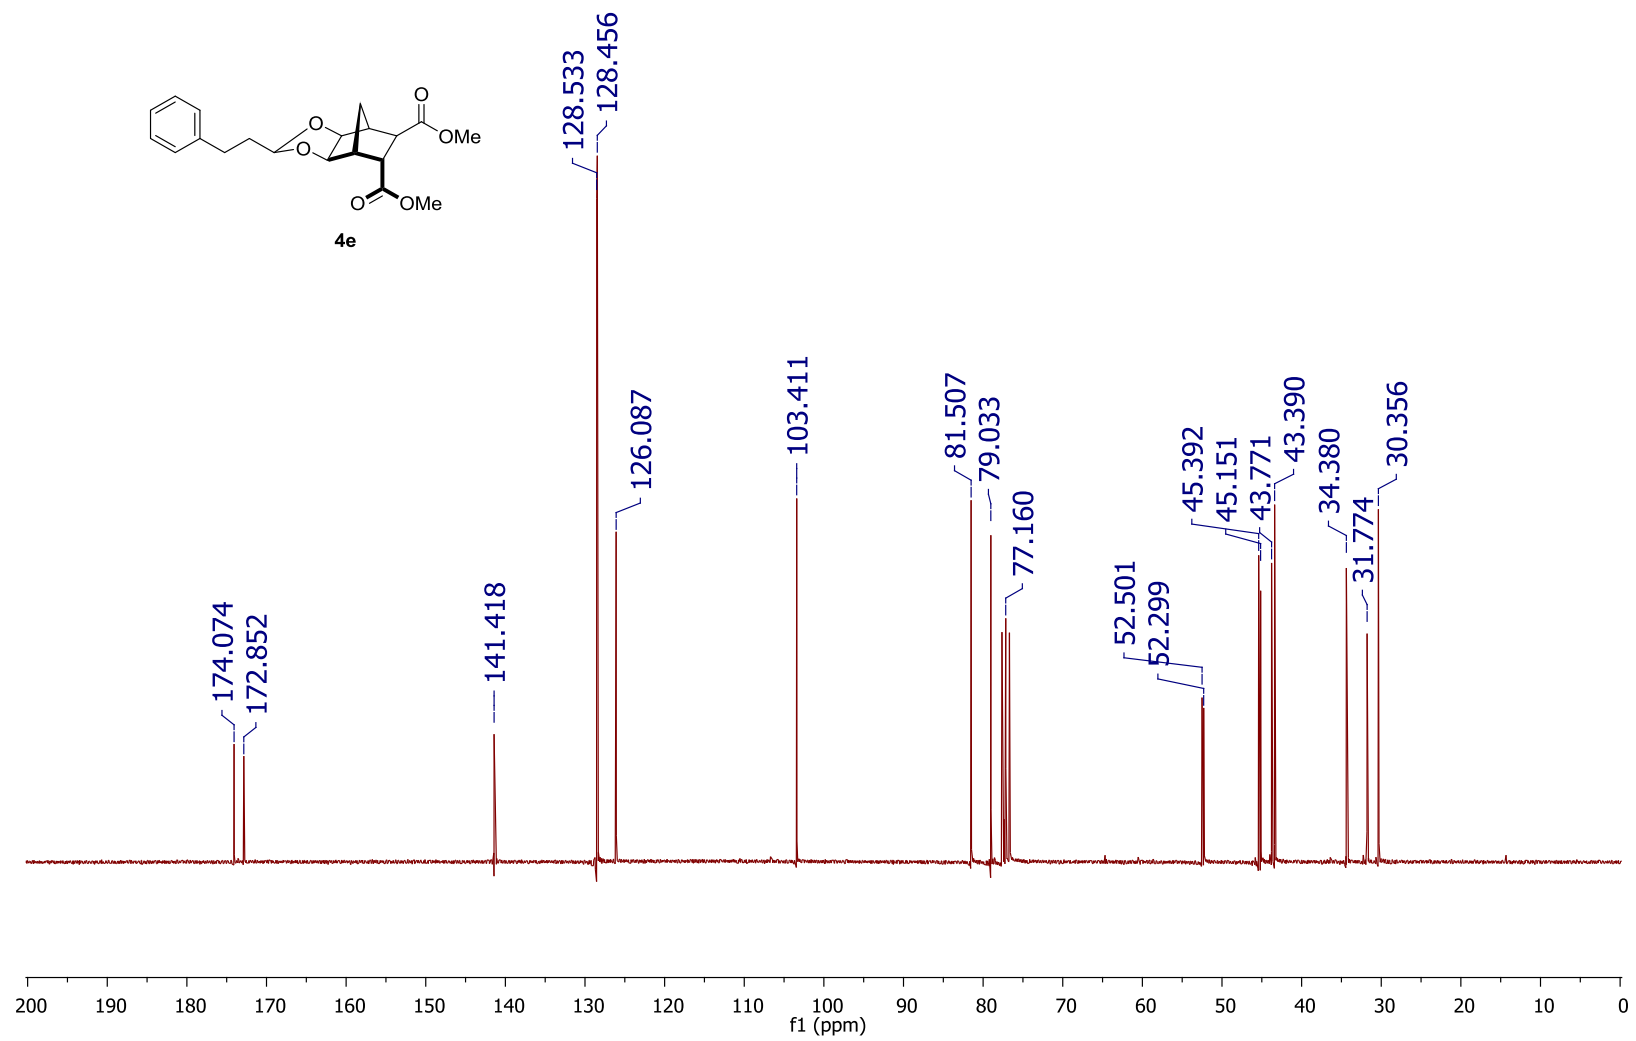

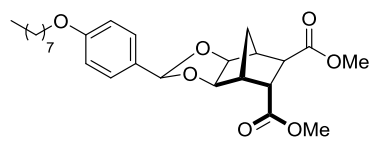

S17

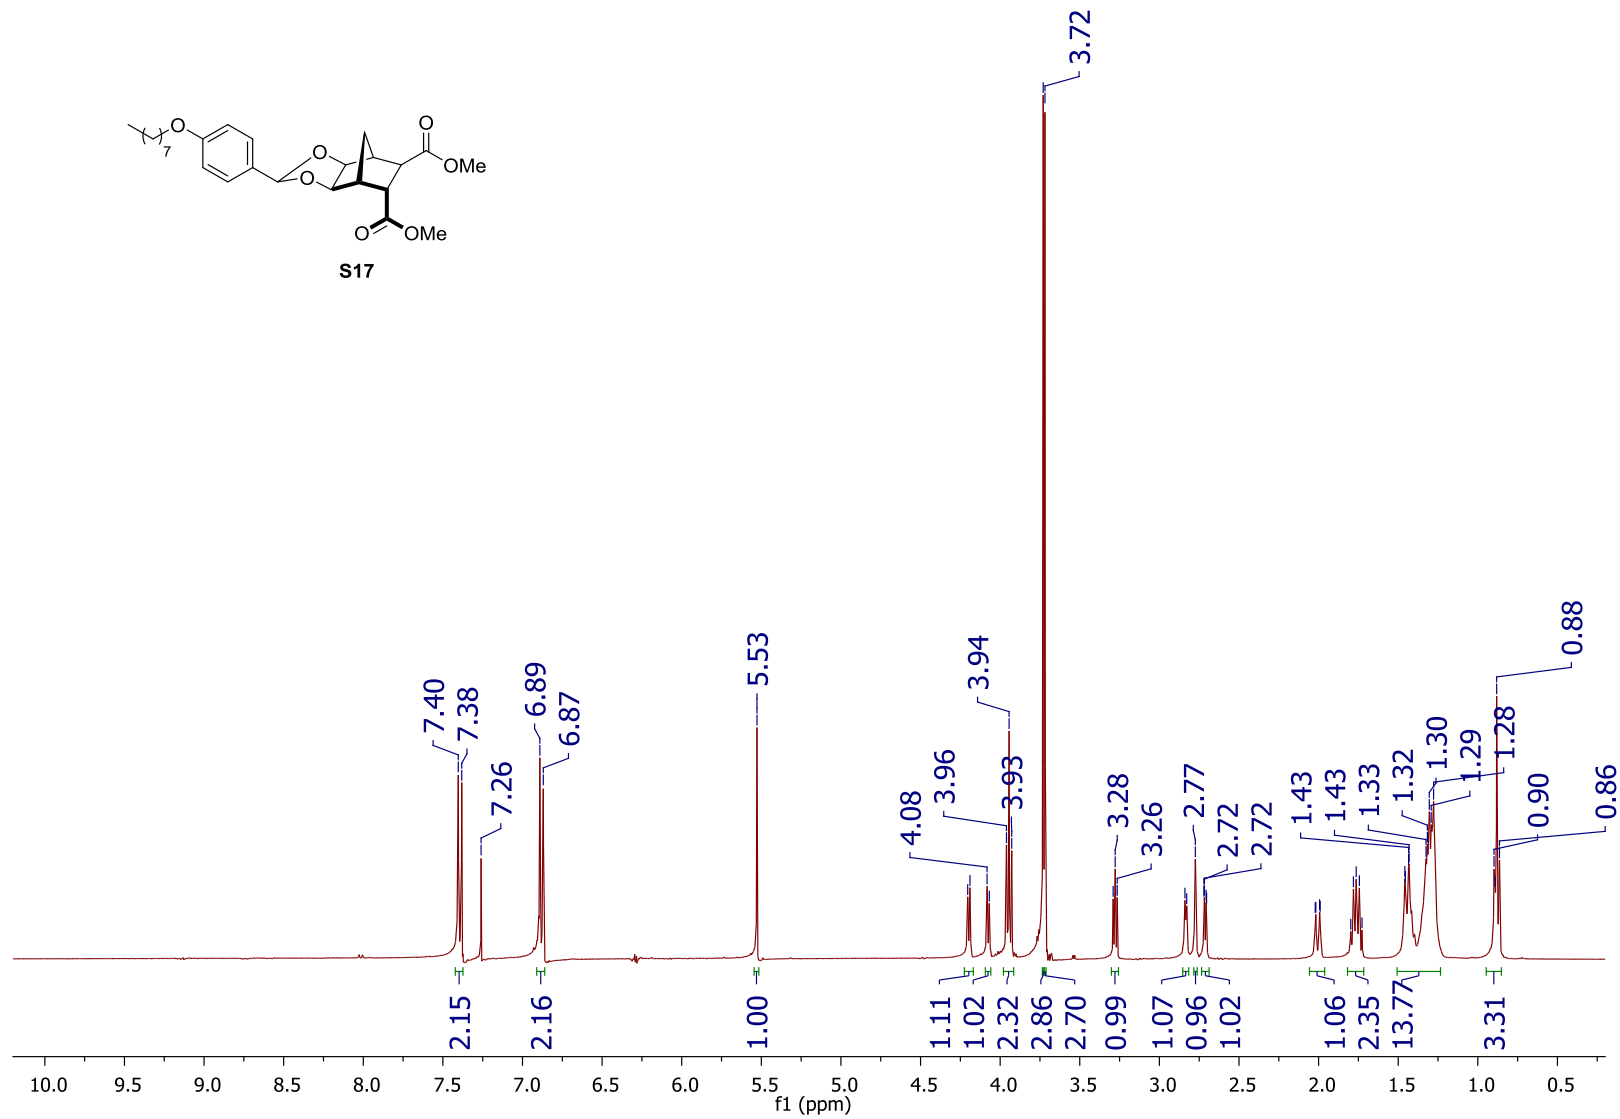

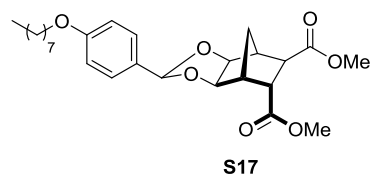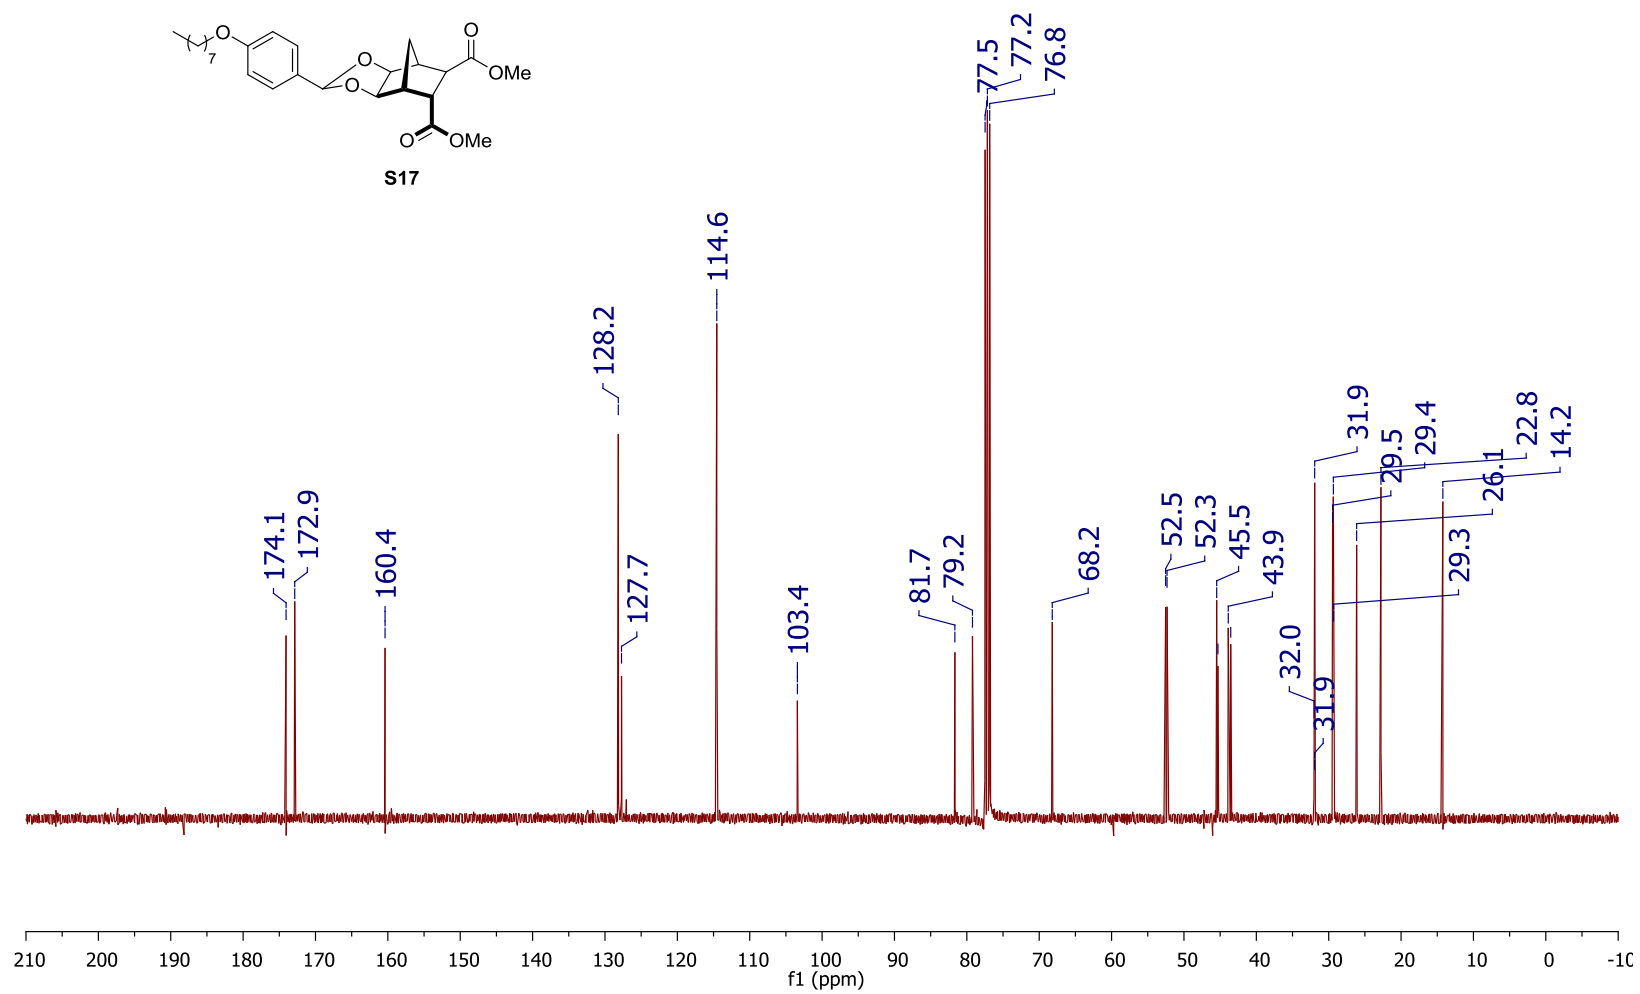

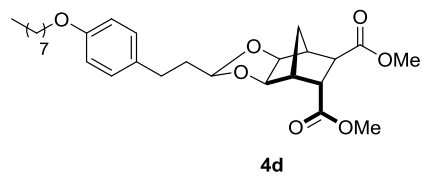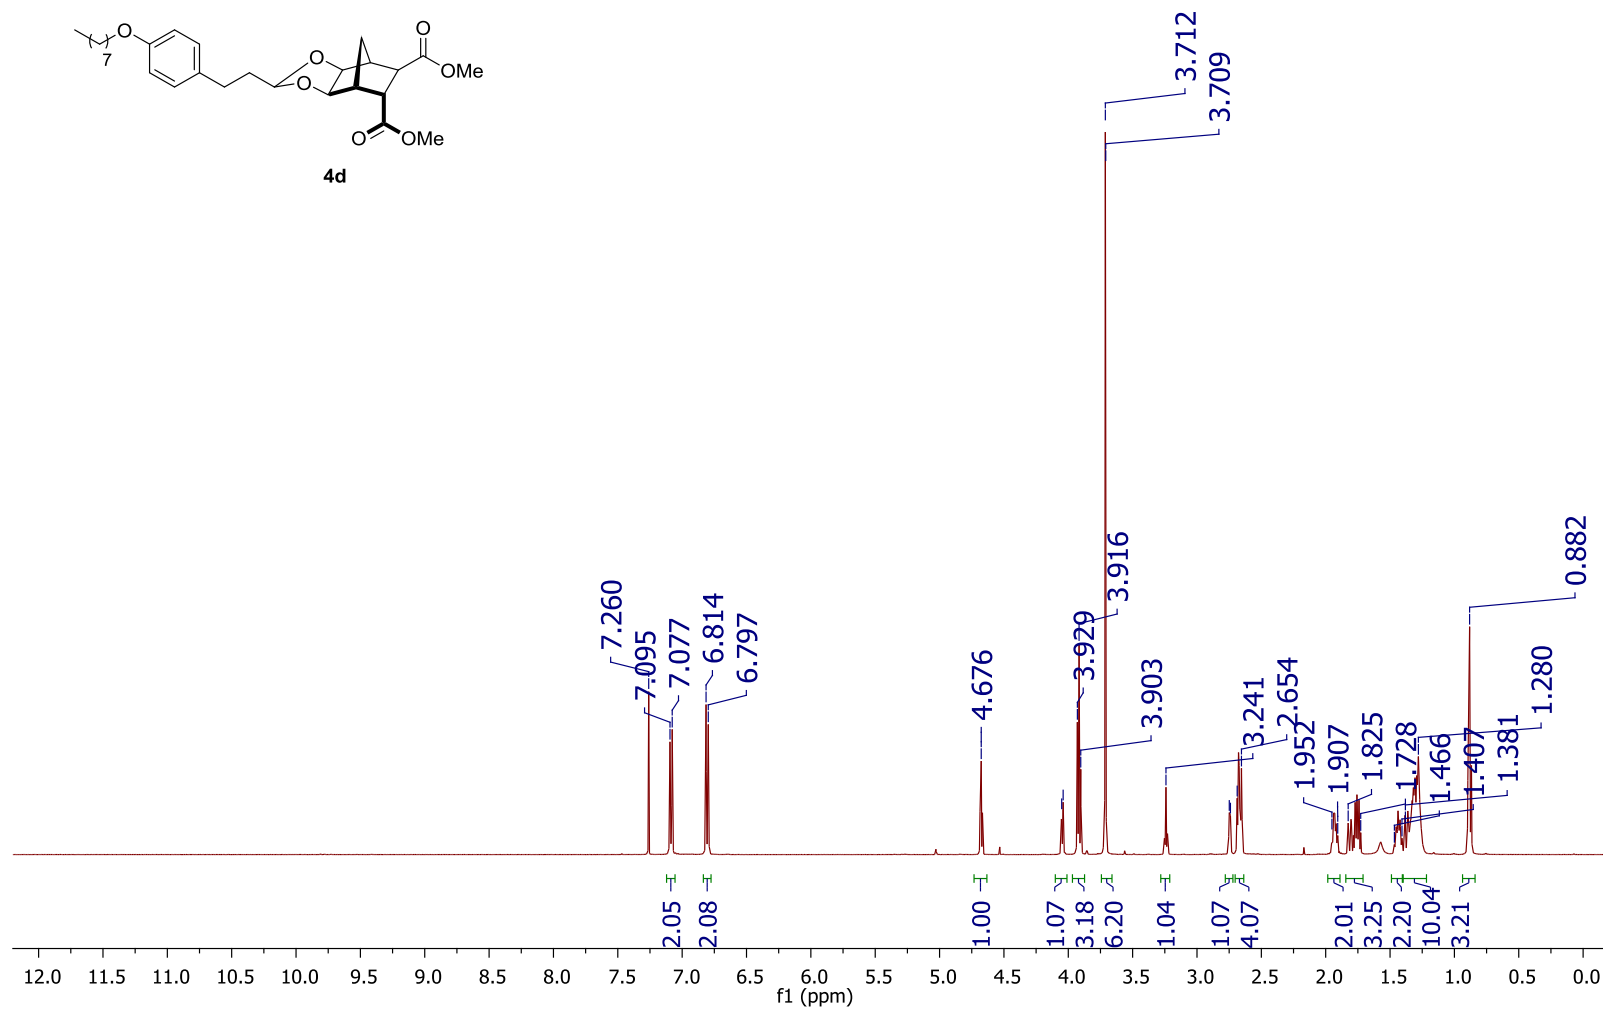

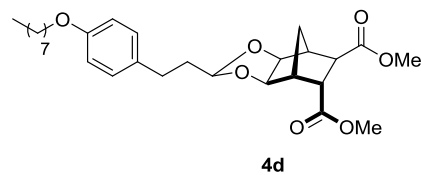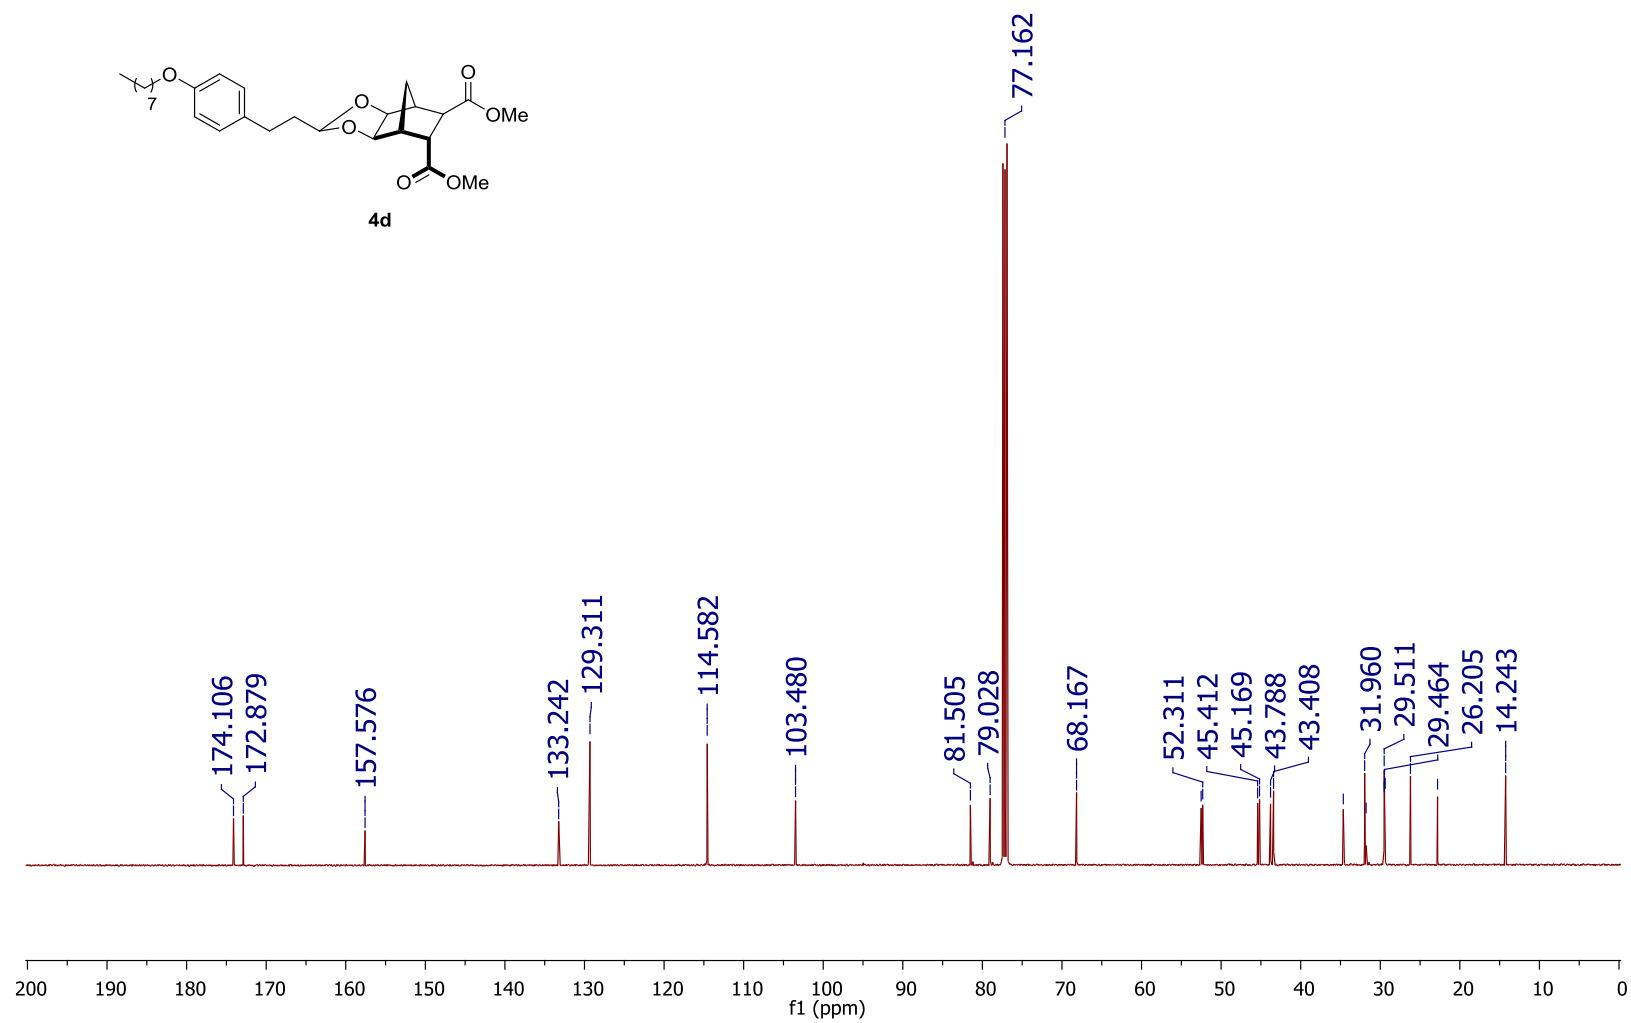

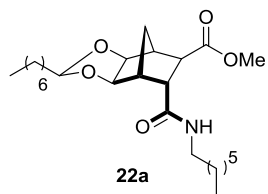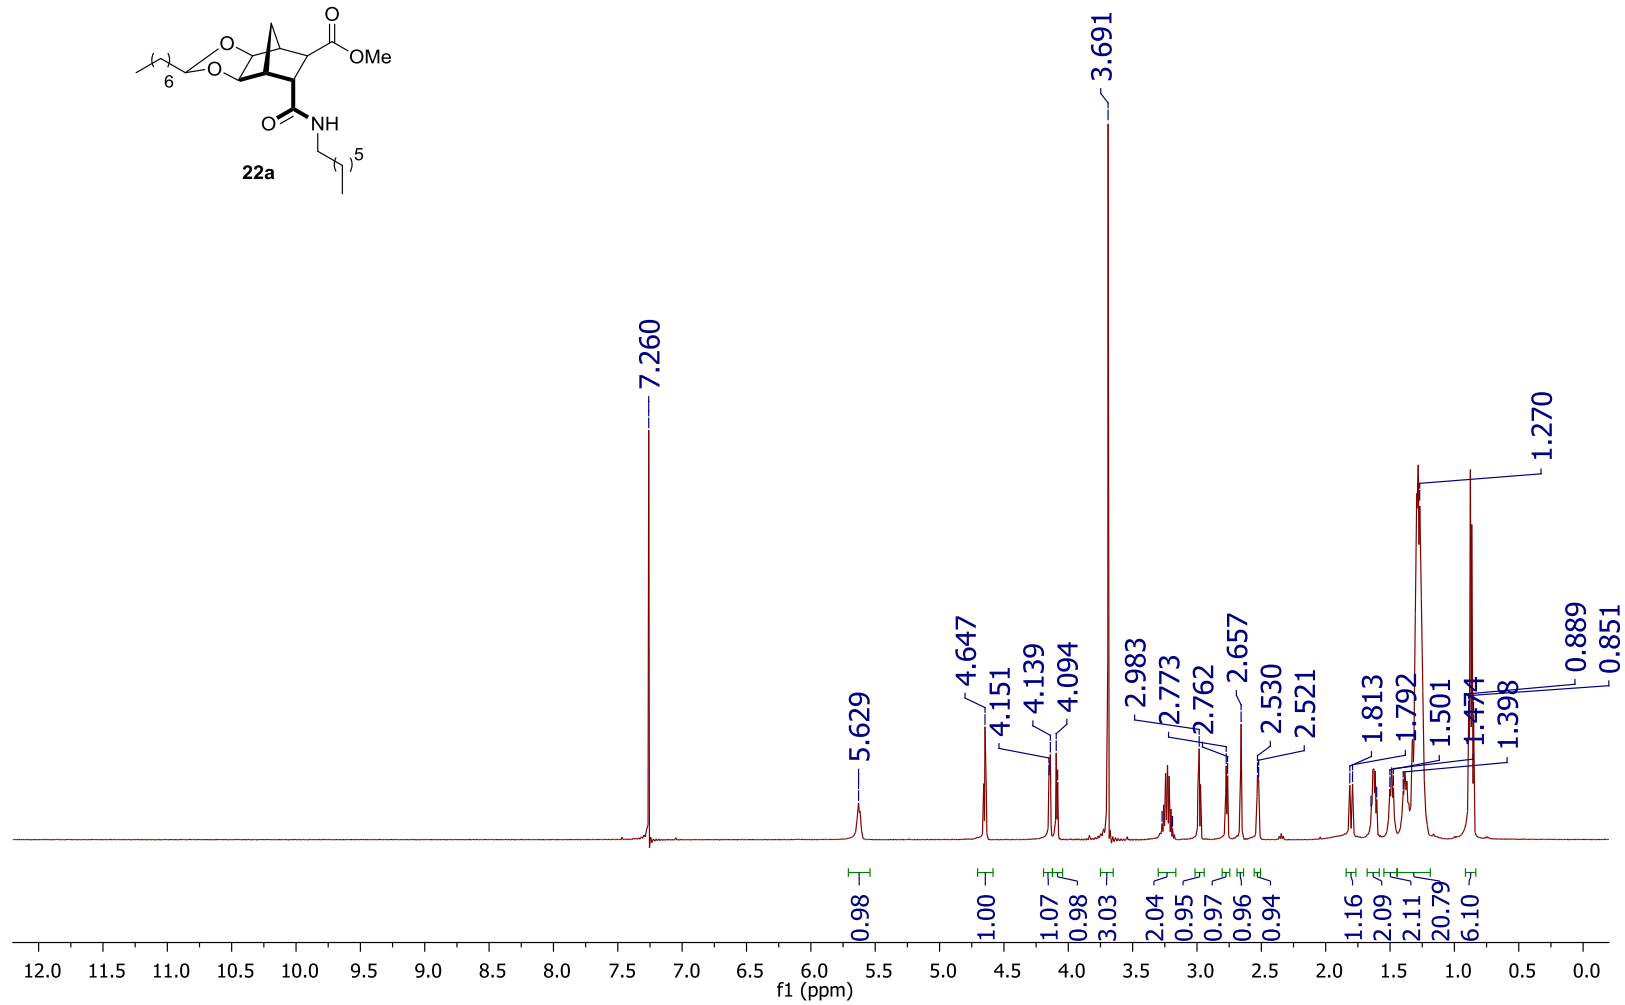

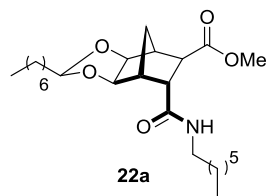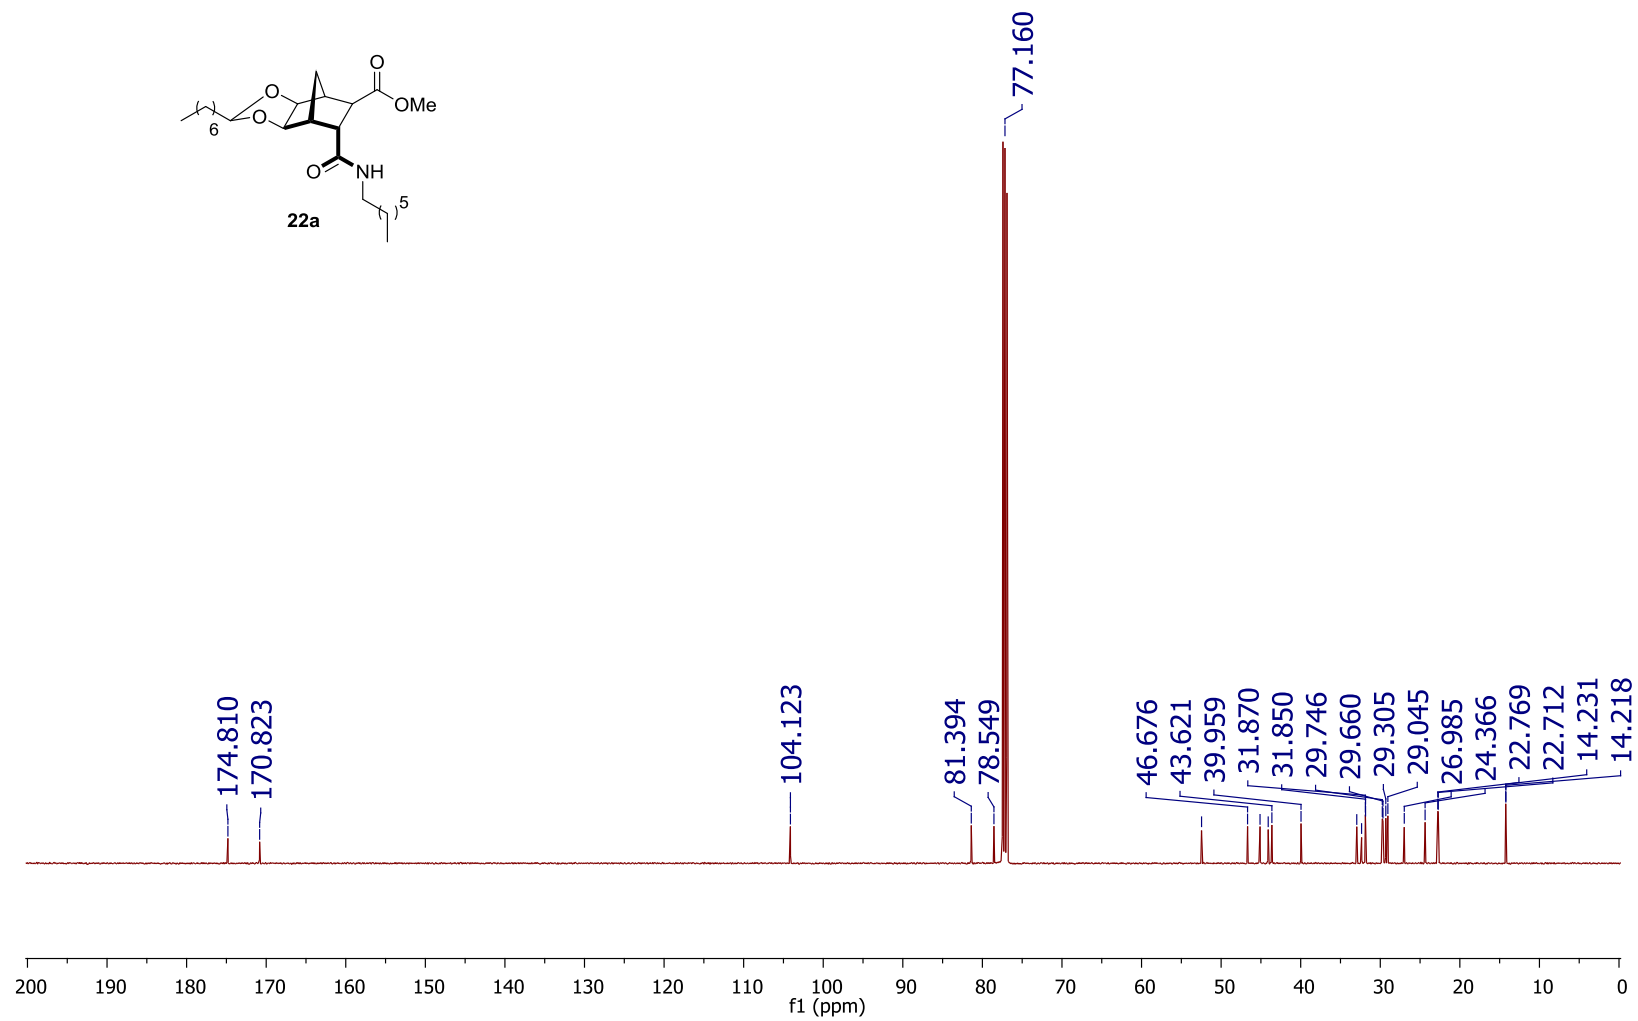

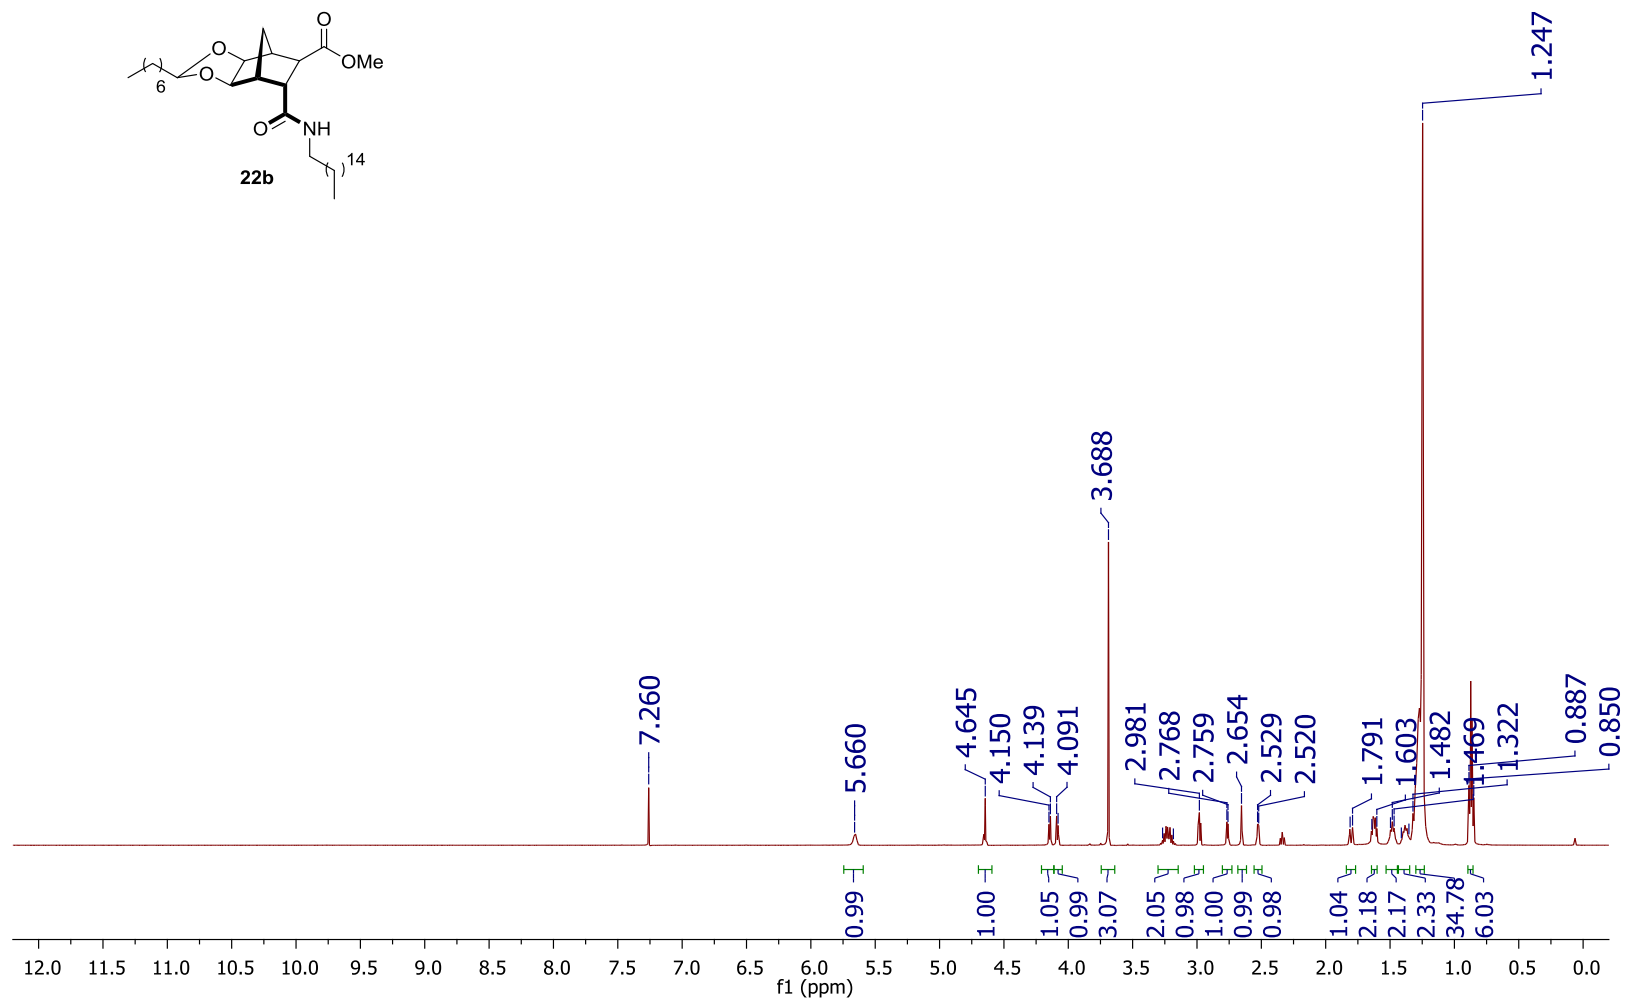

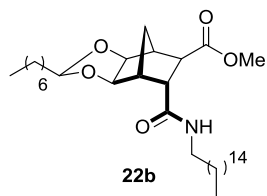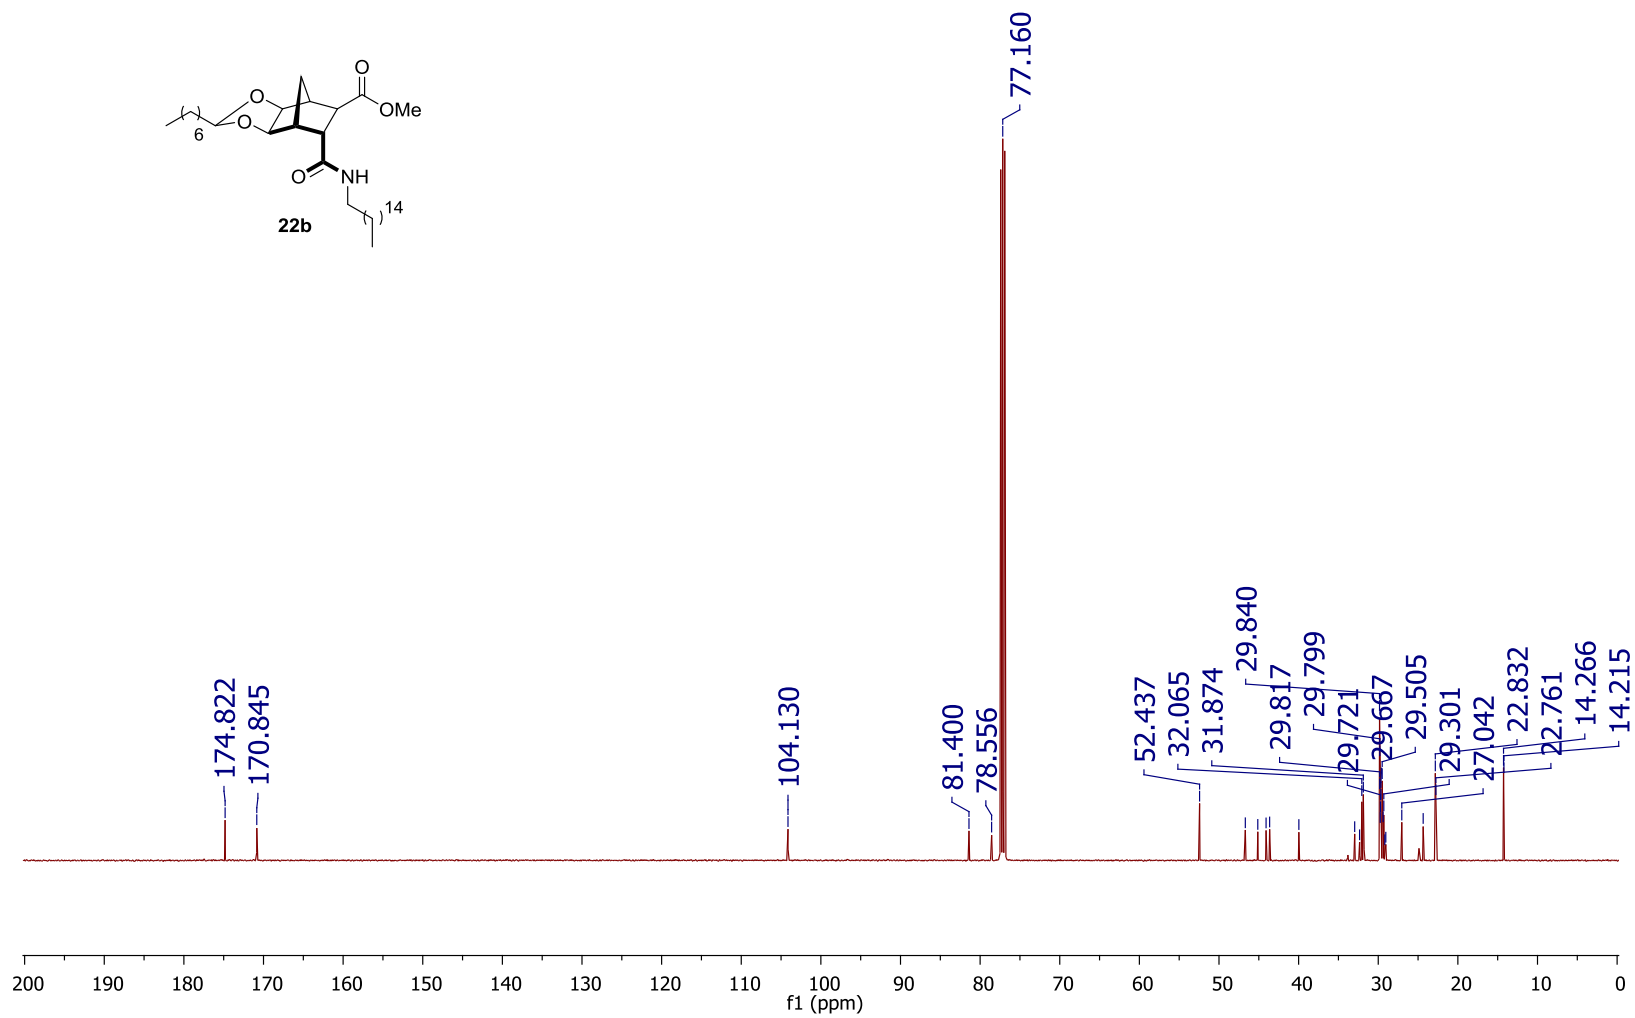

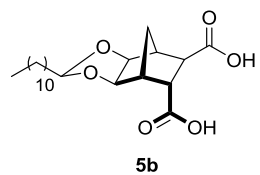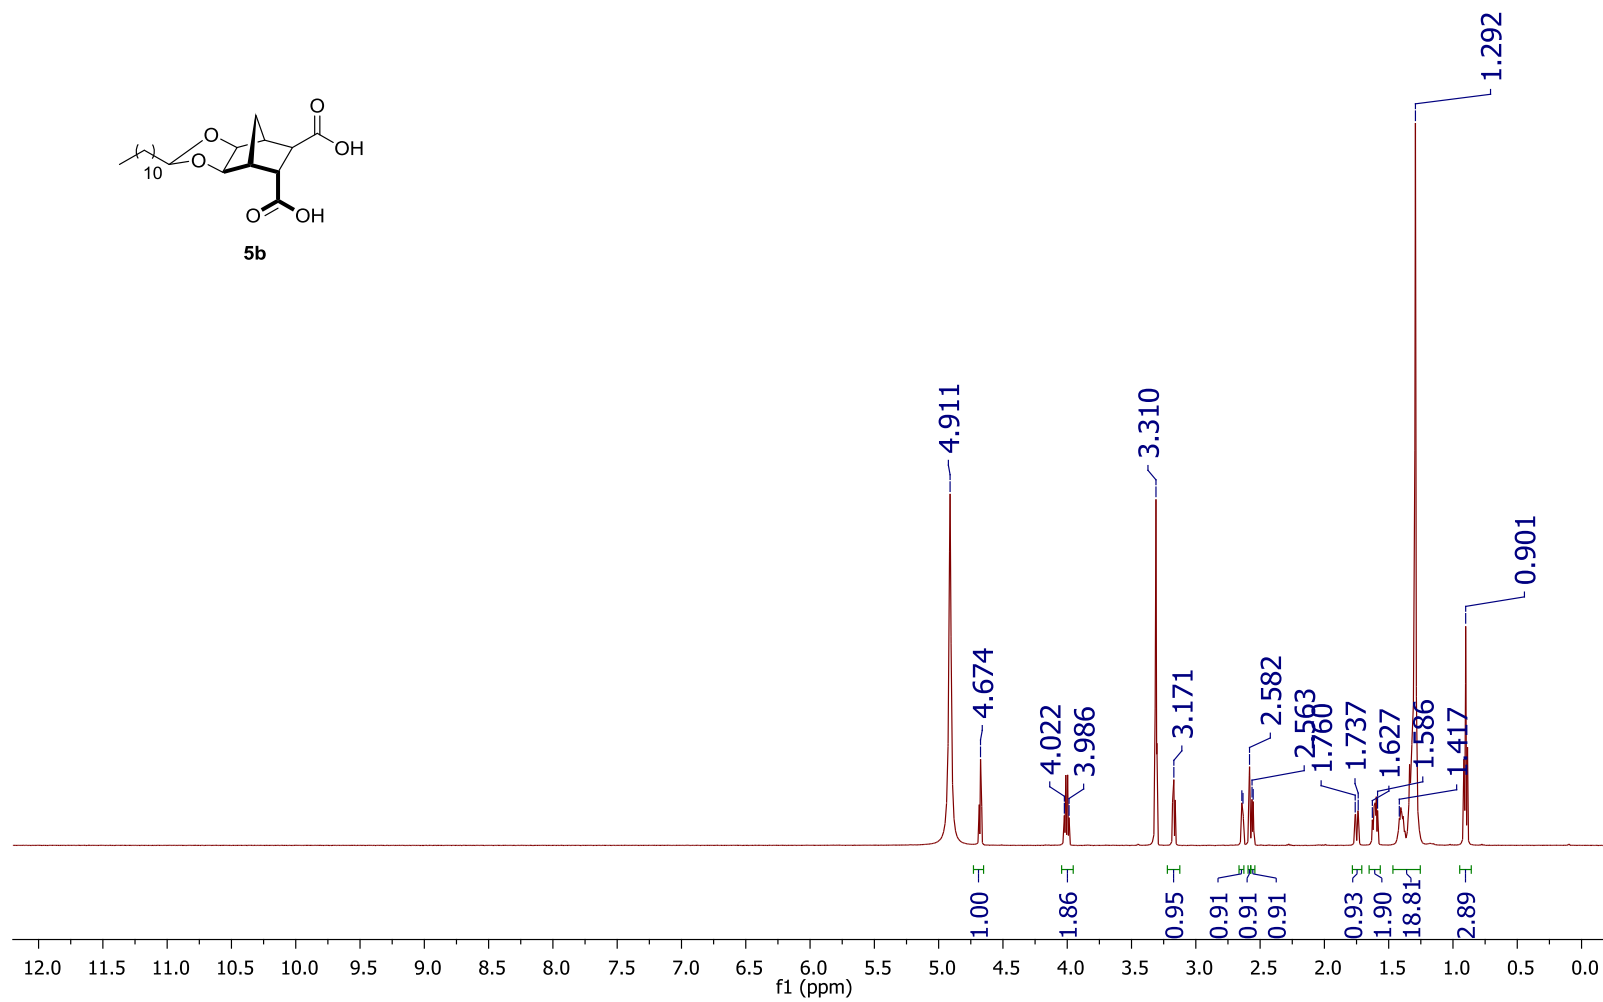

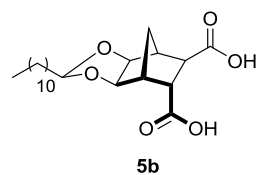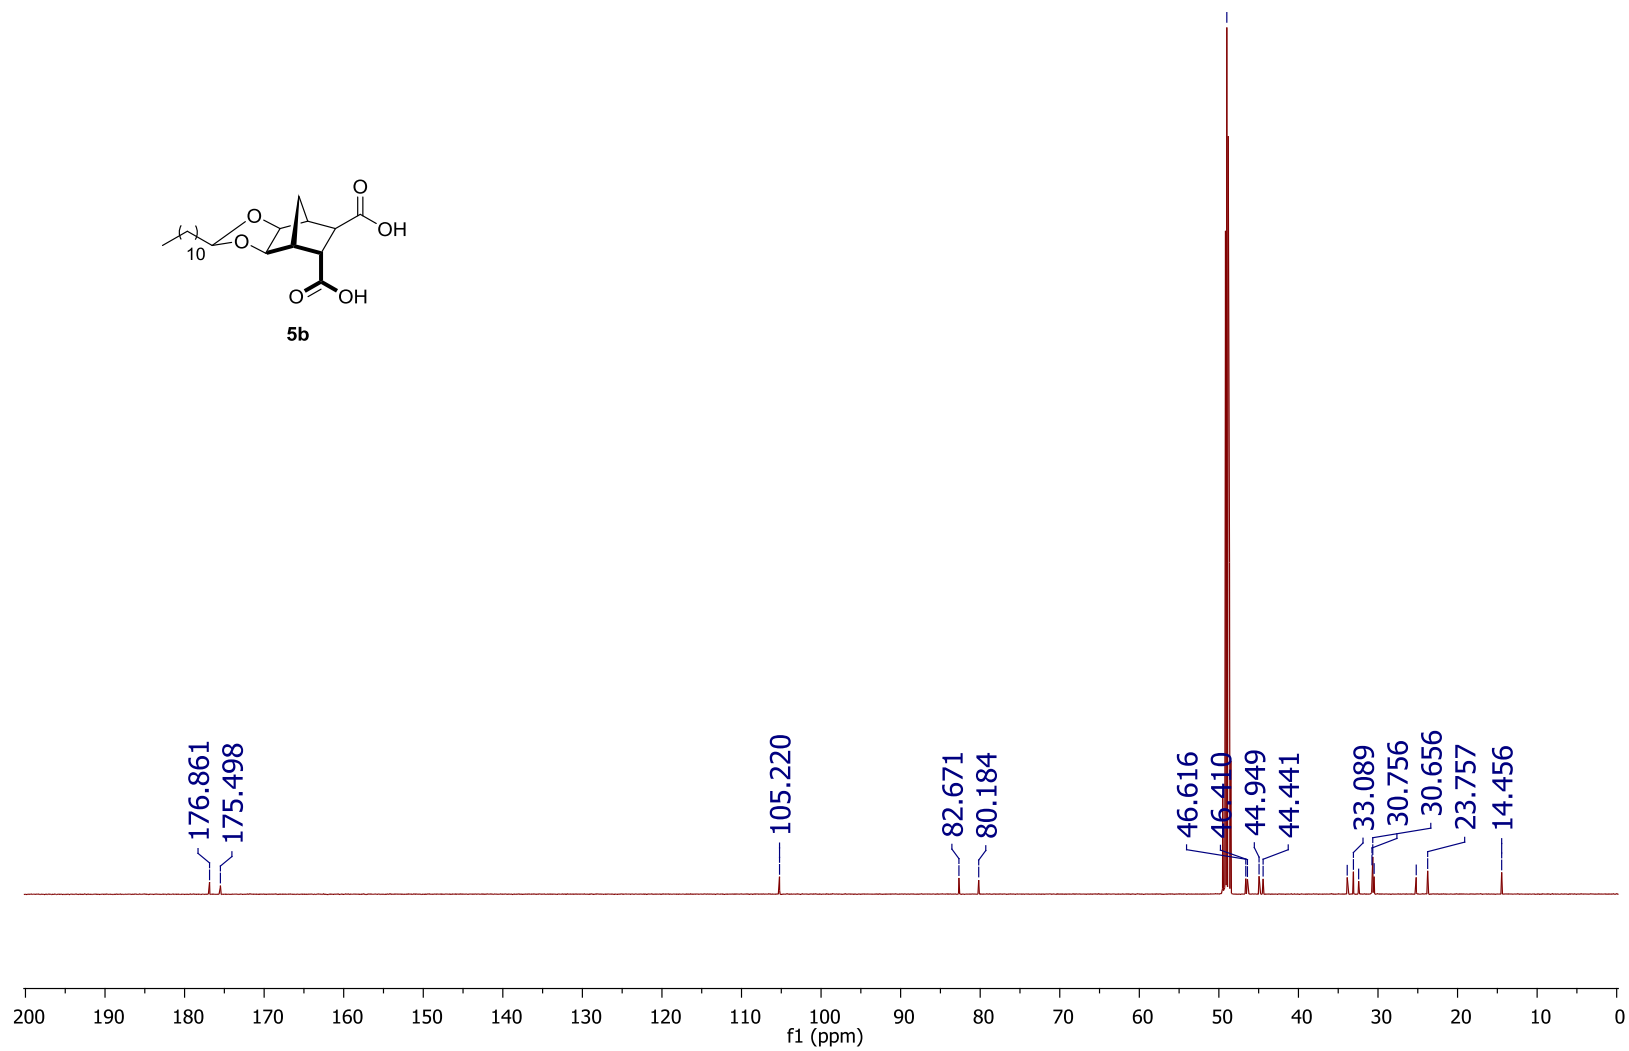

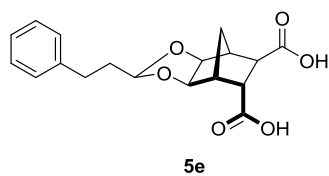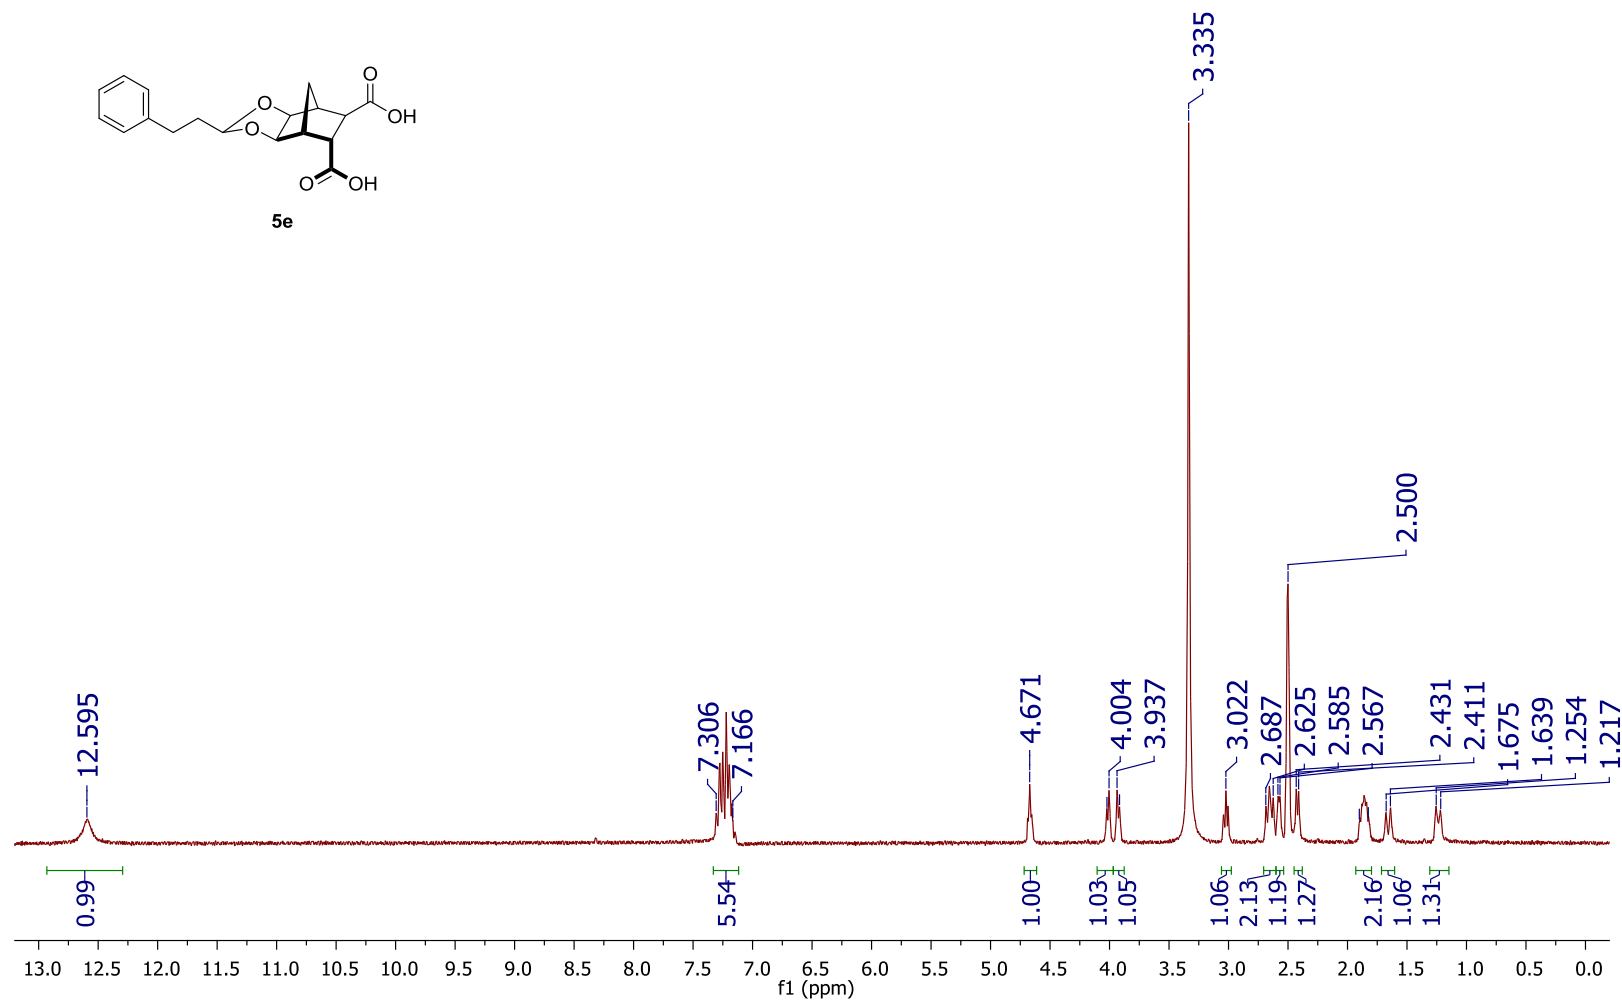

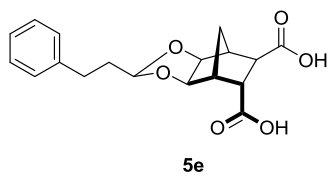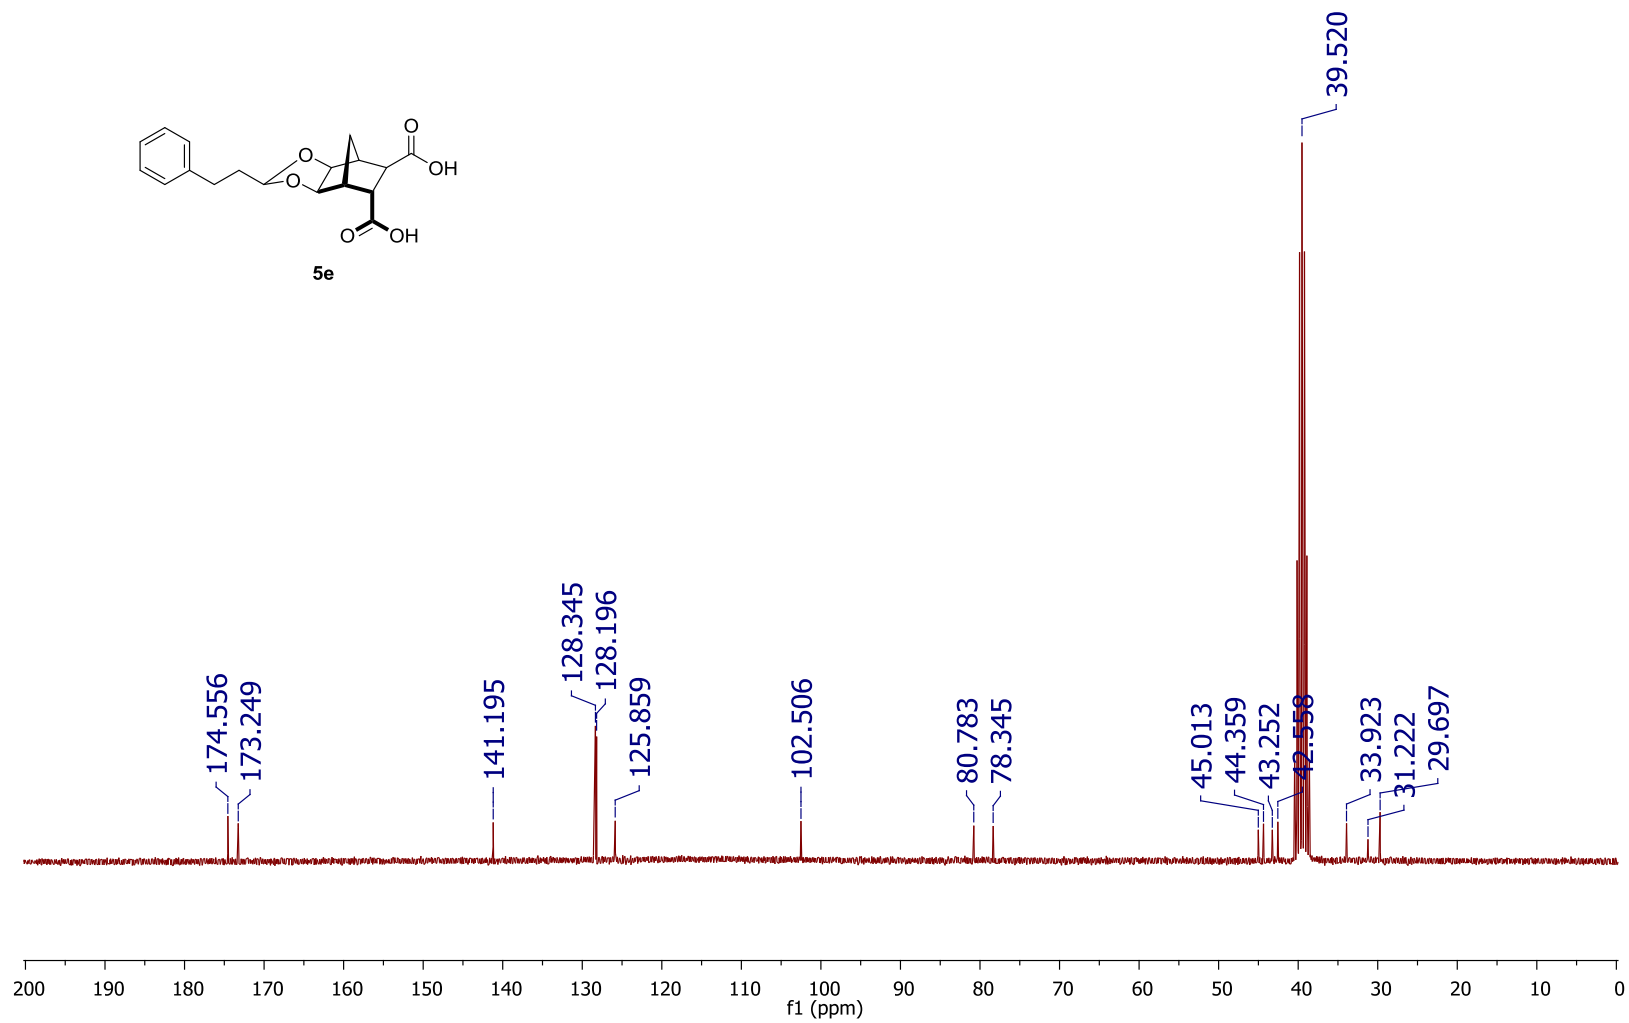

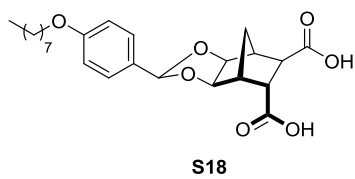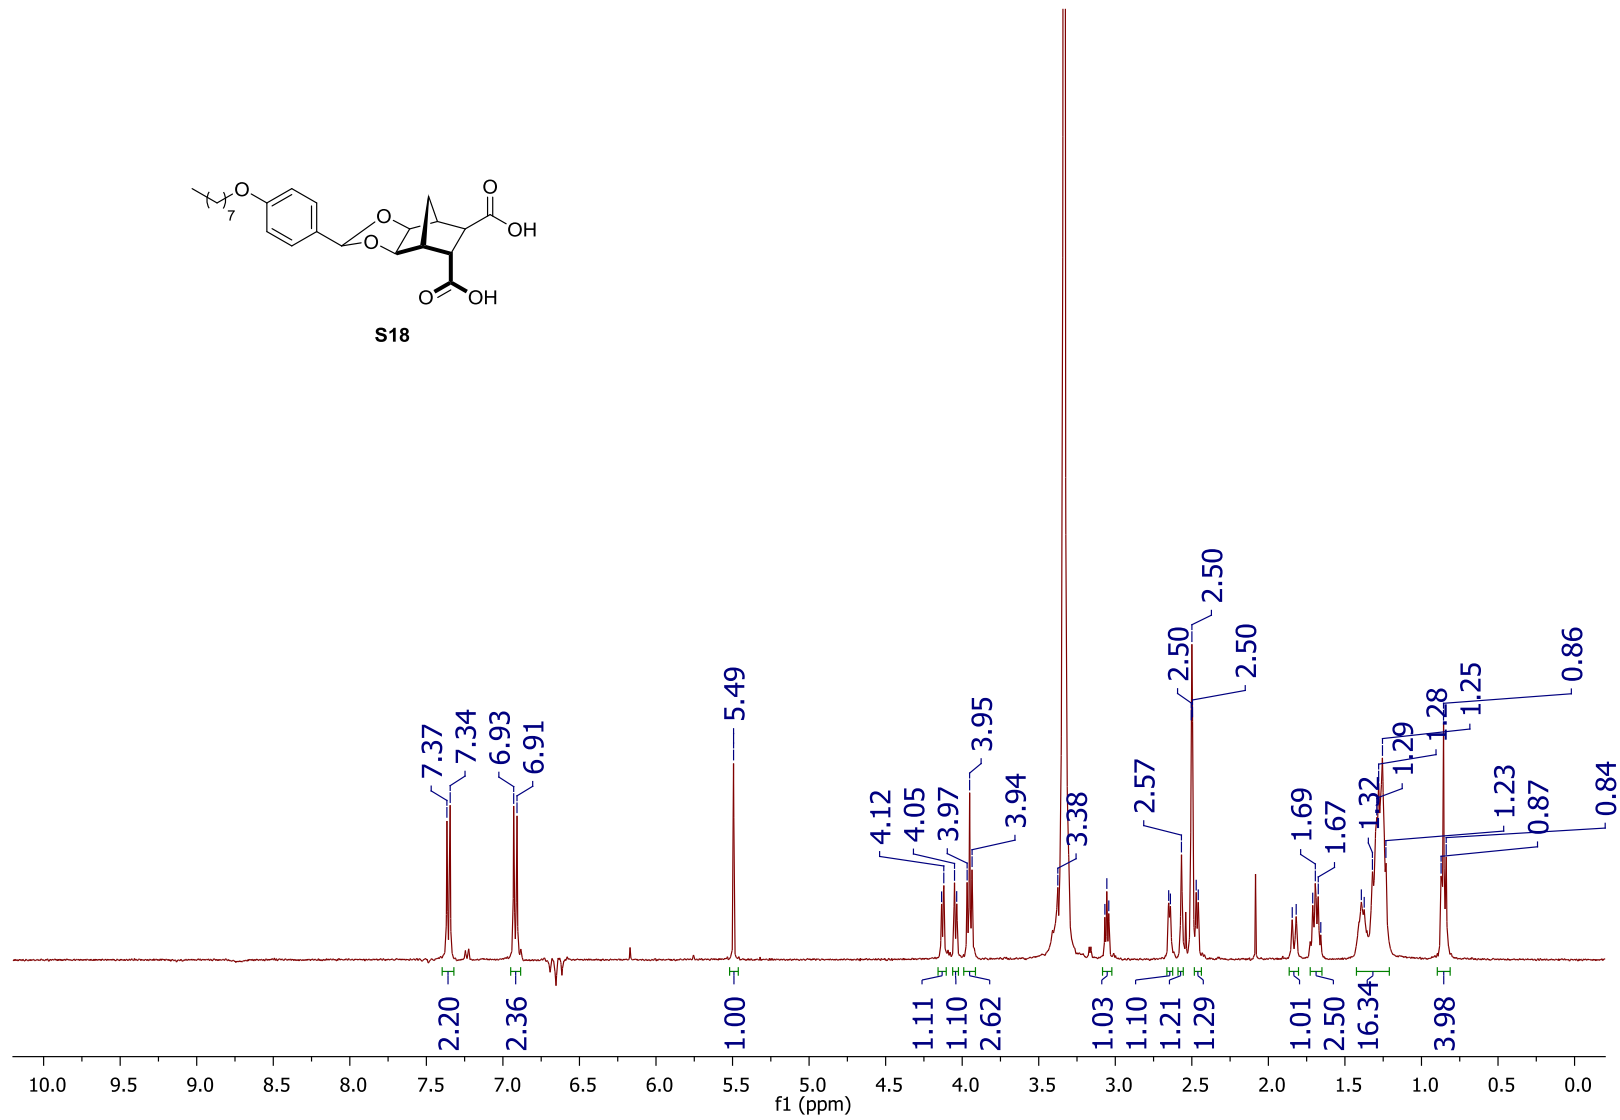

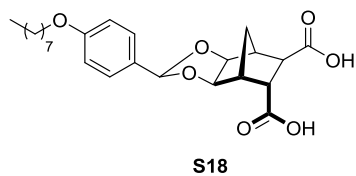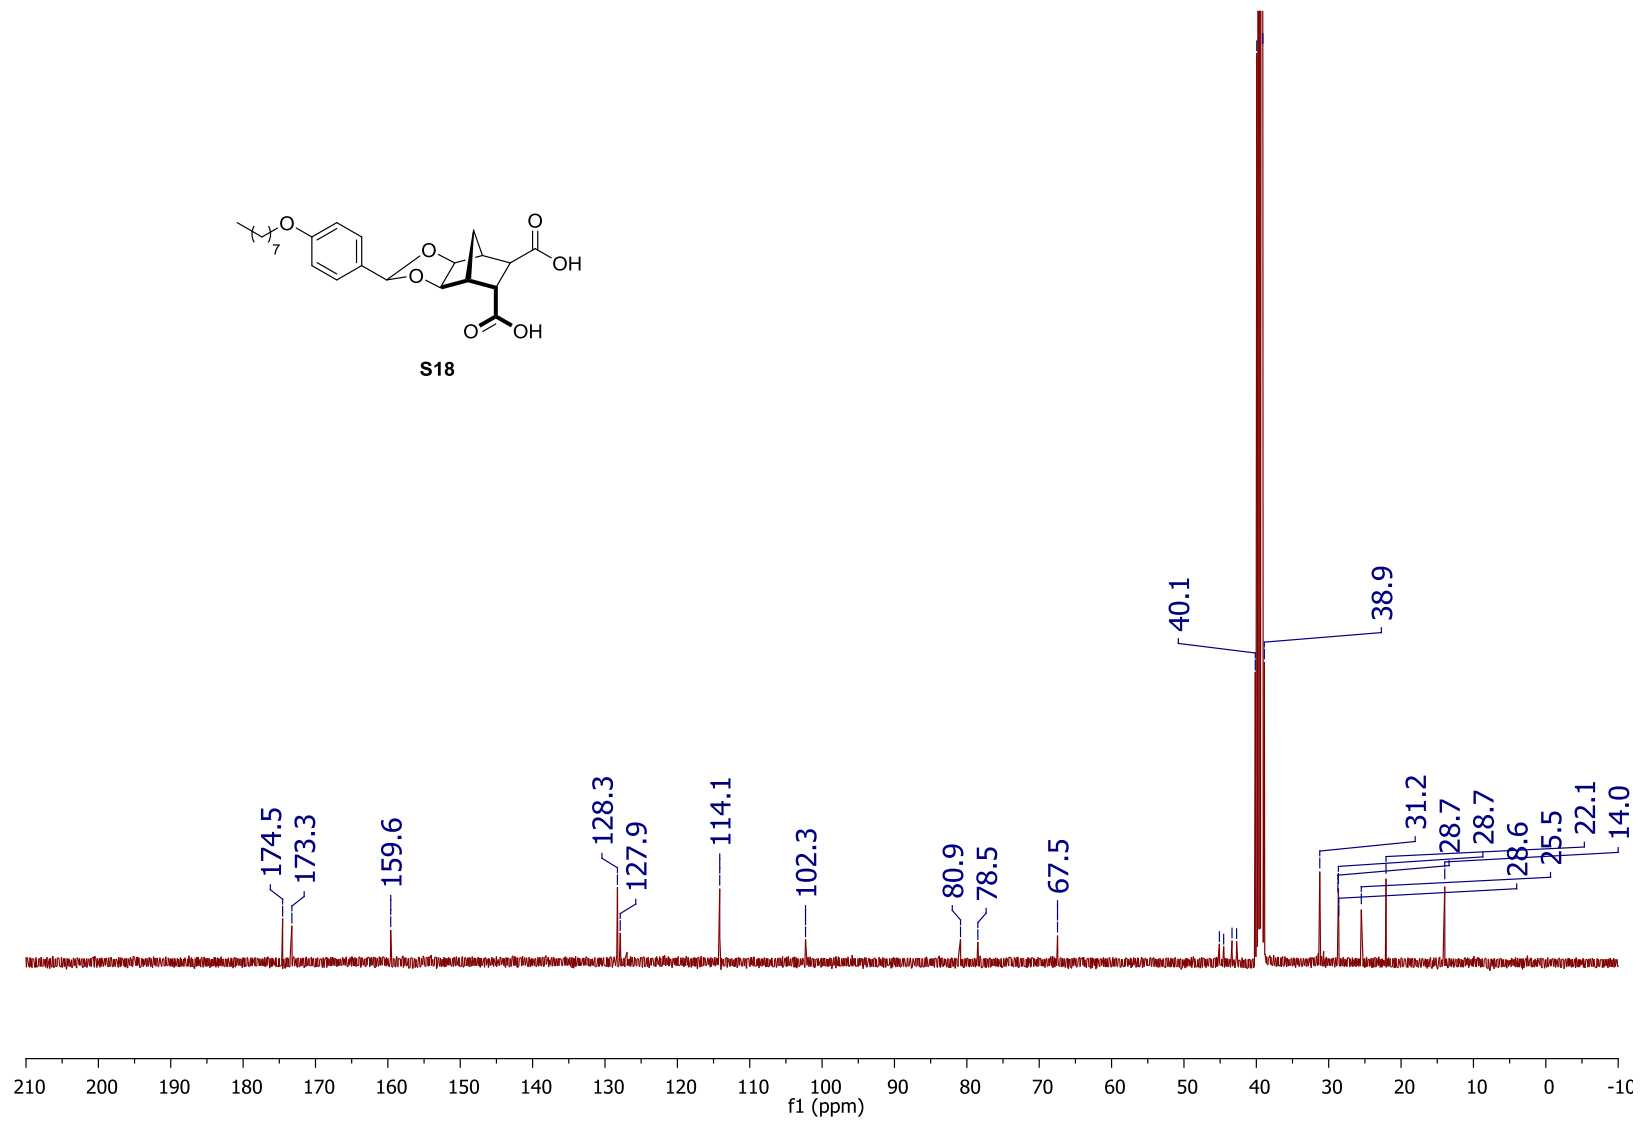

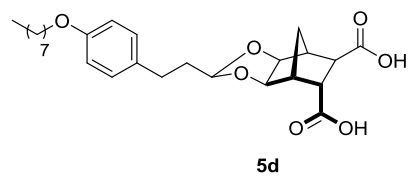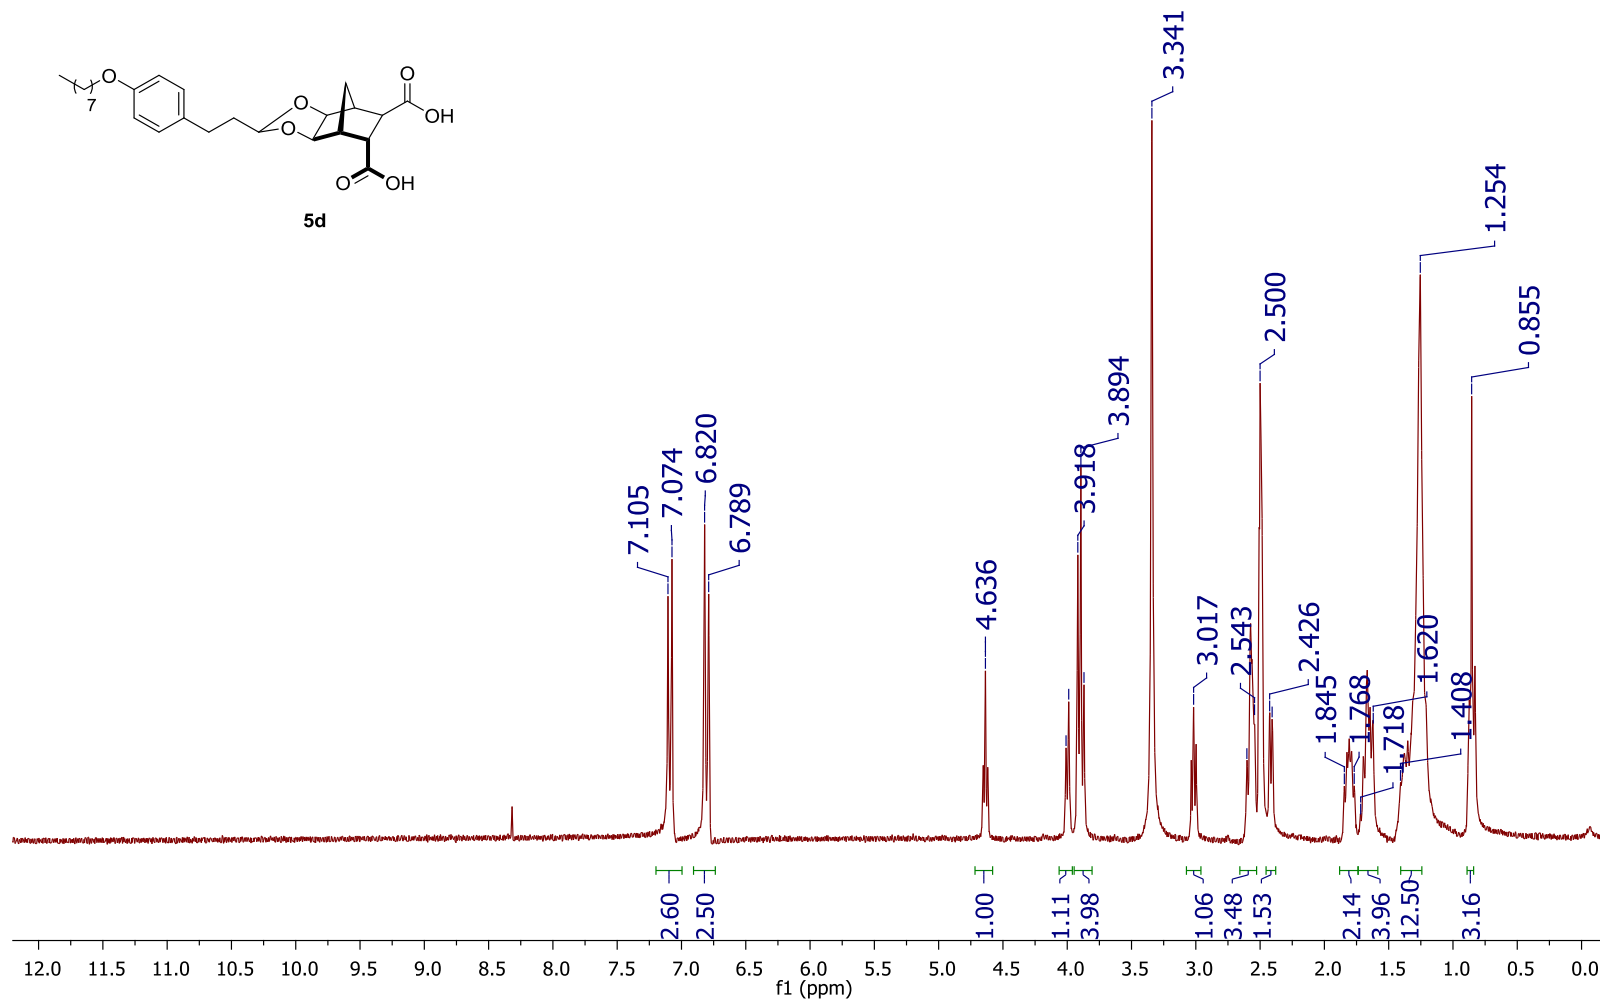

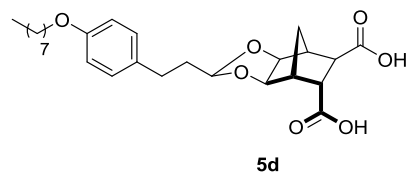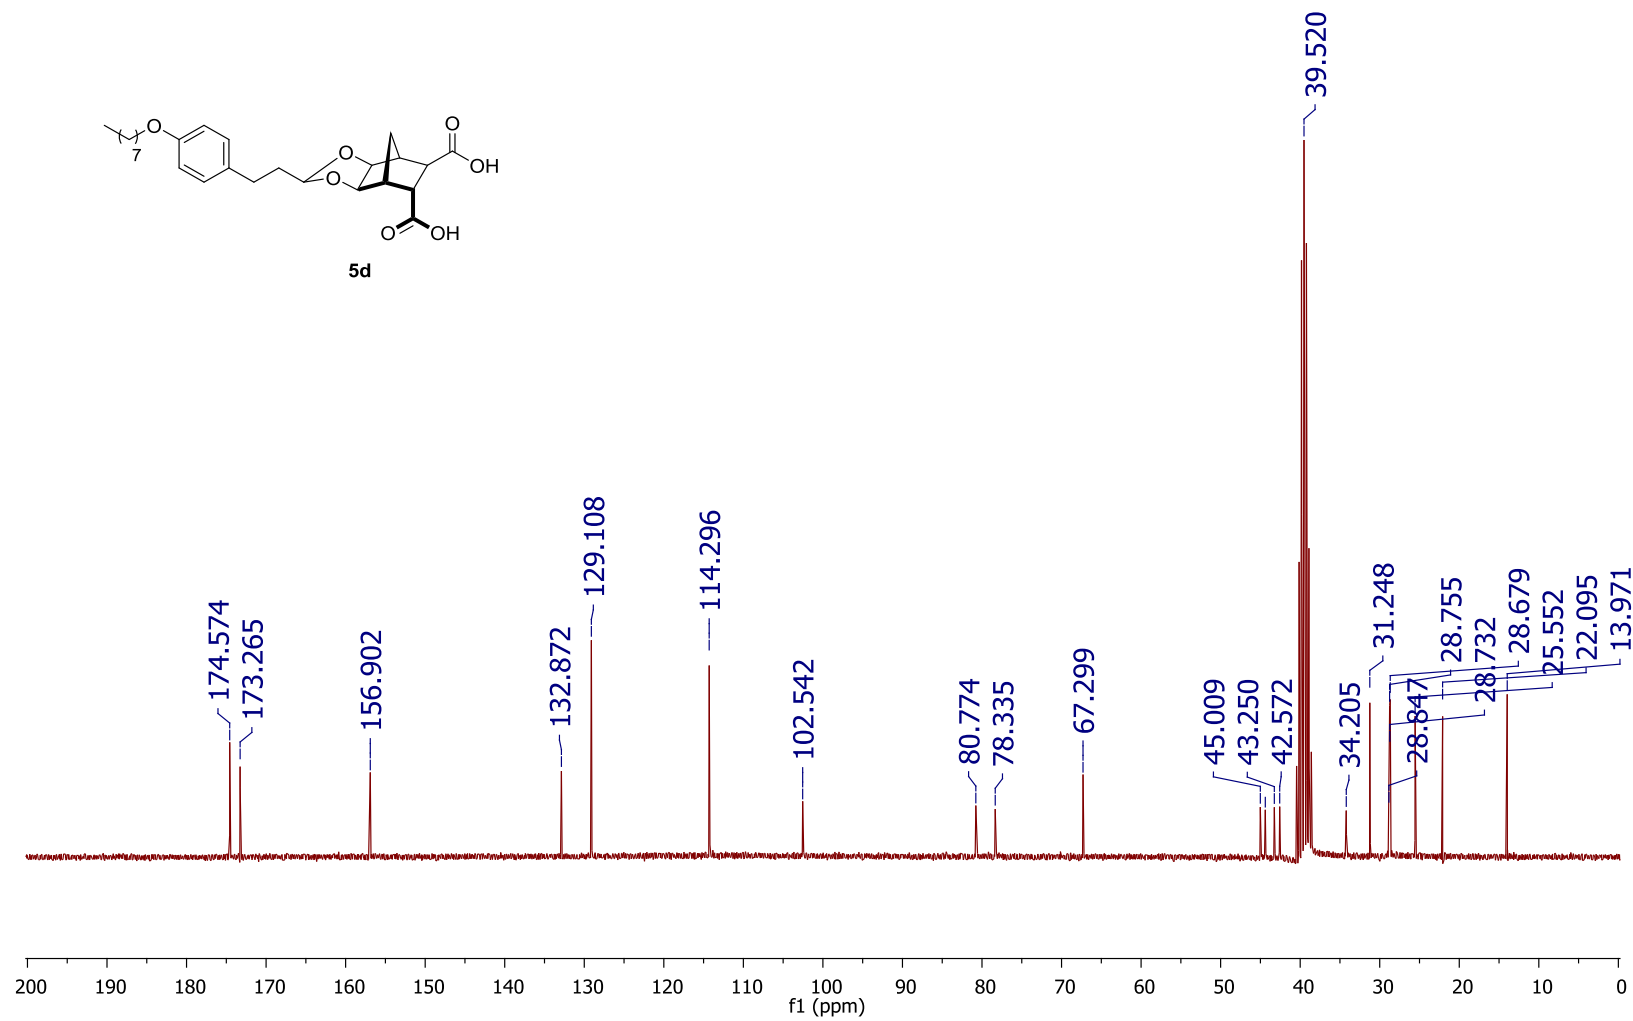

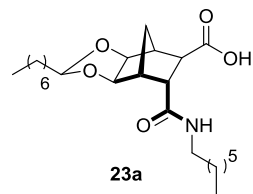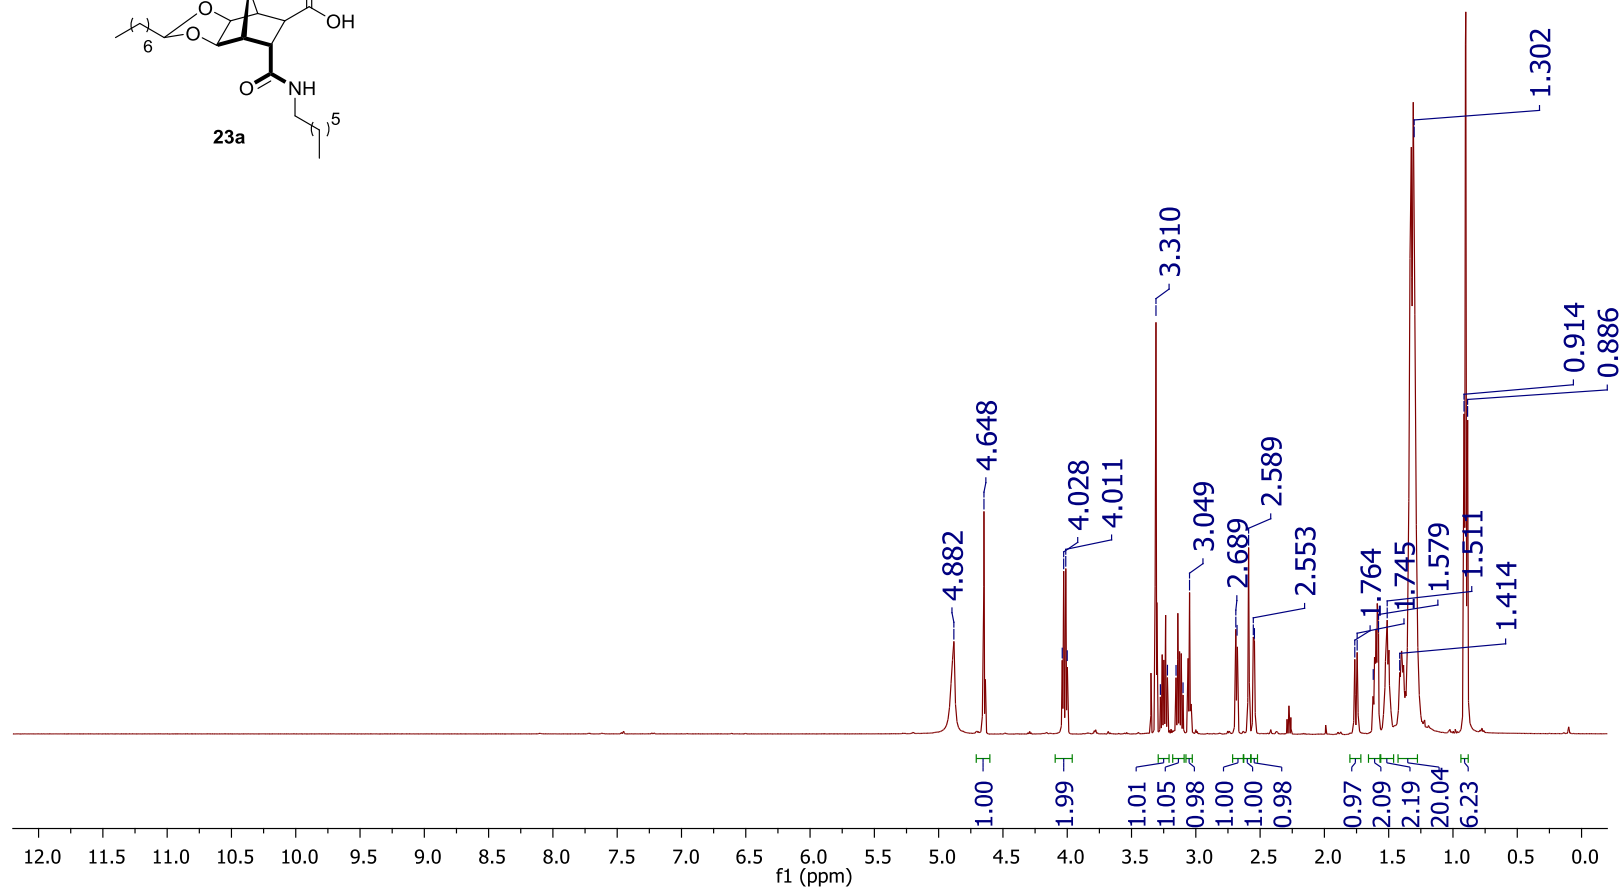

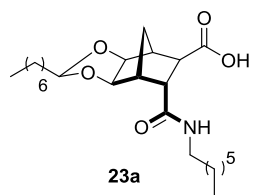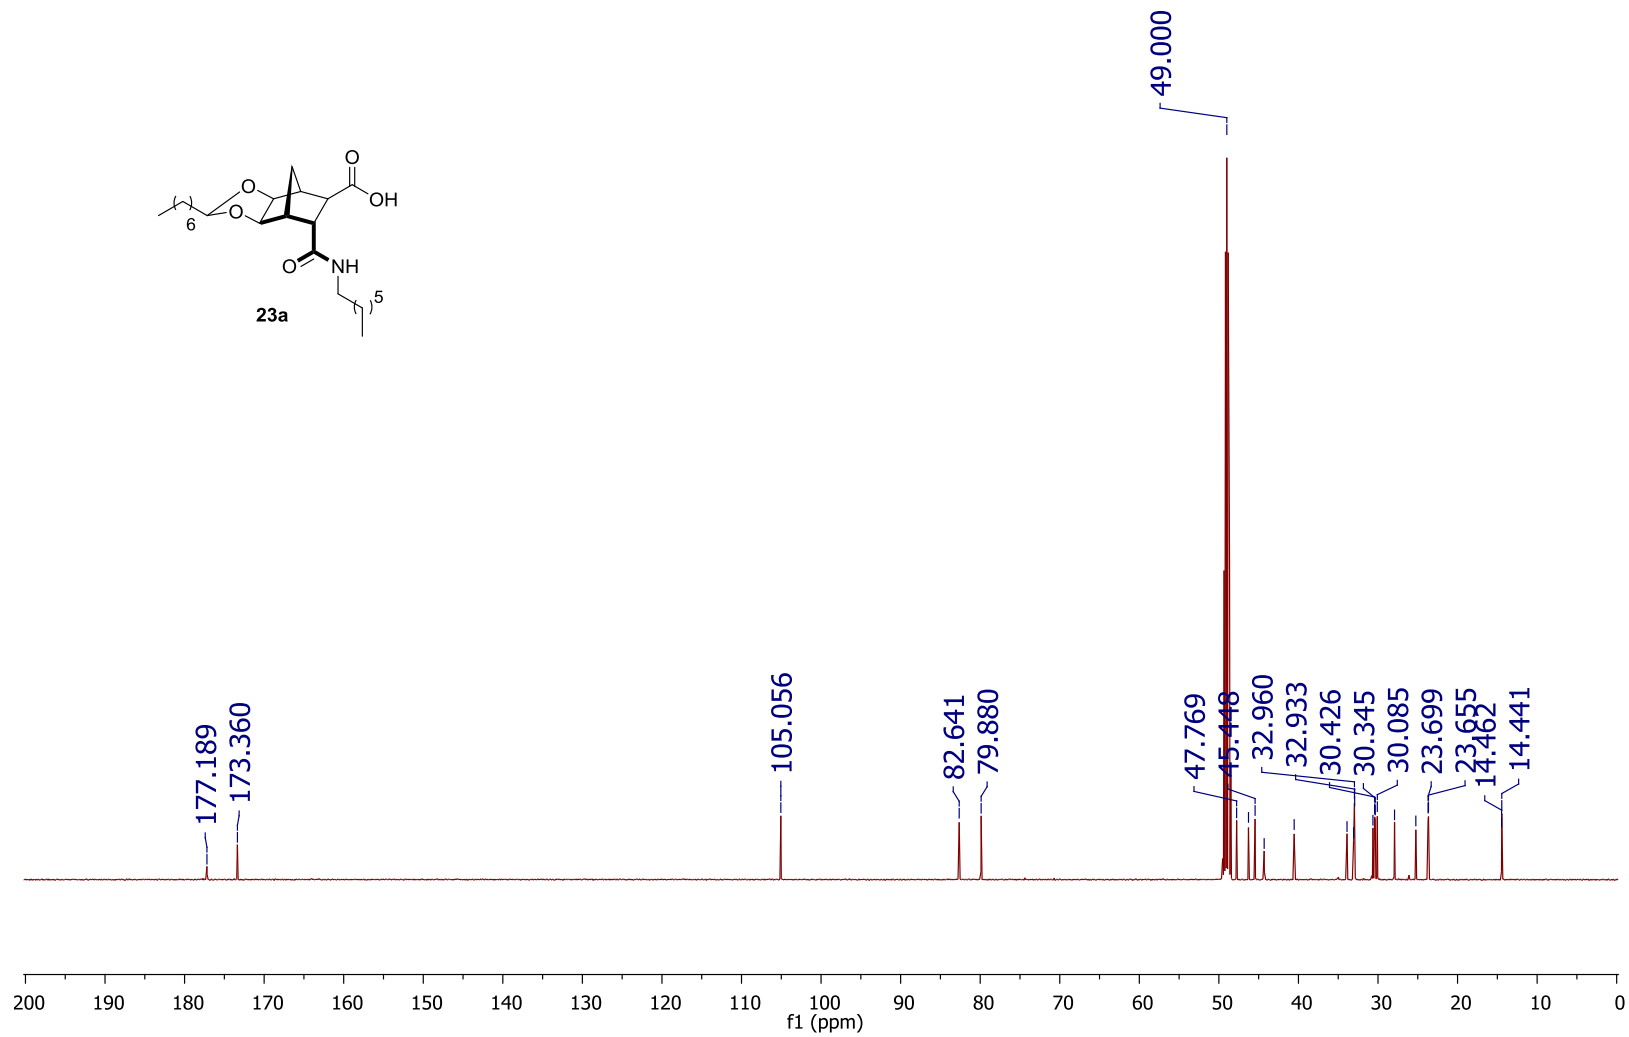

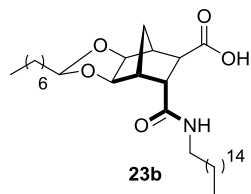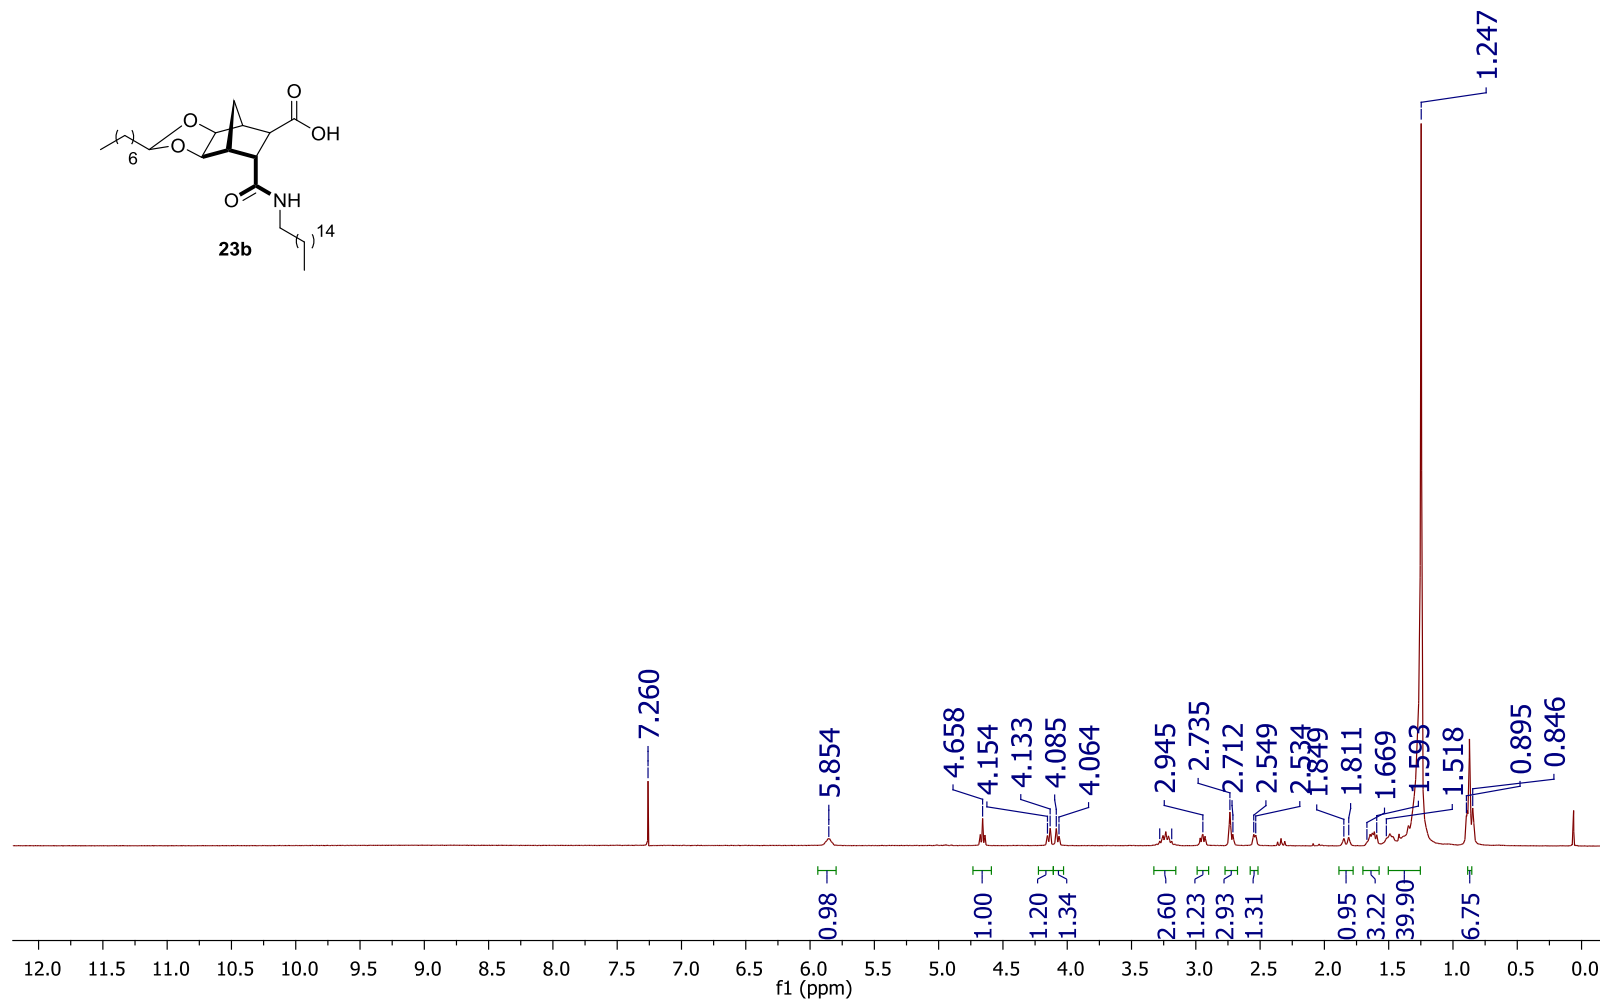

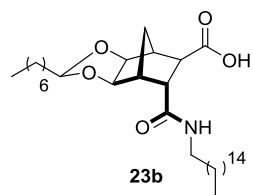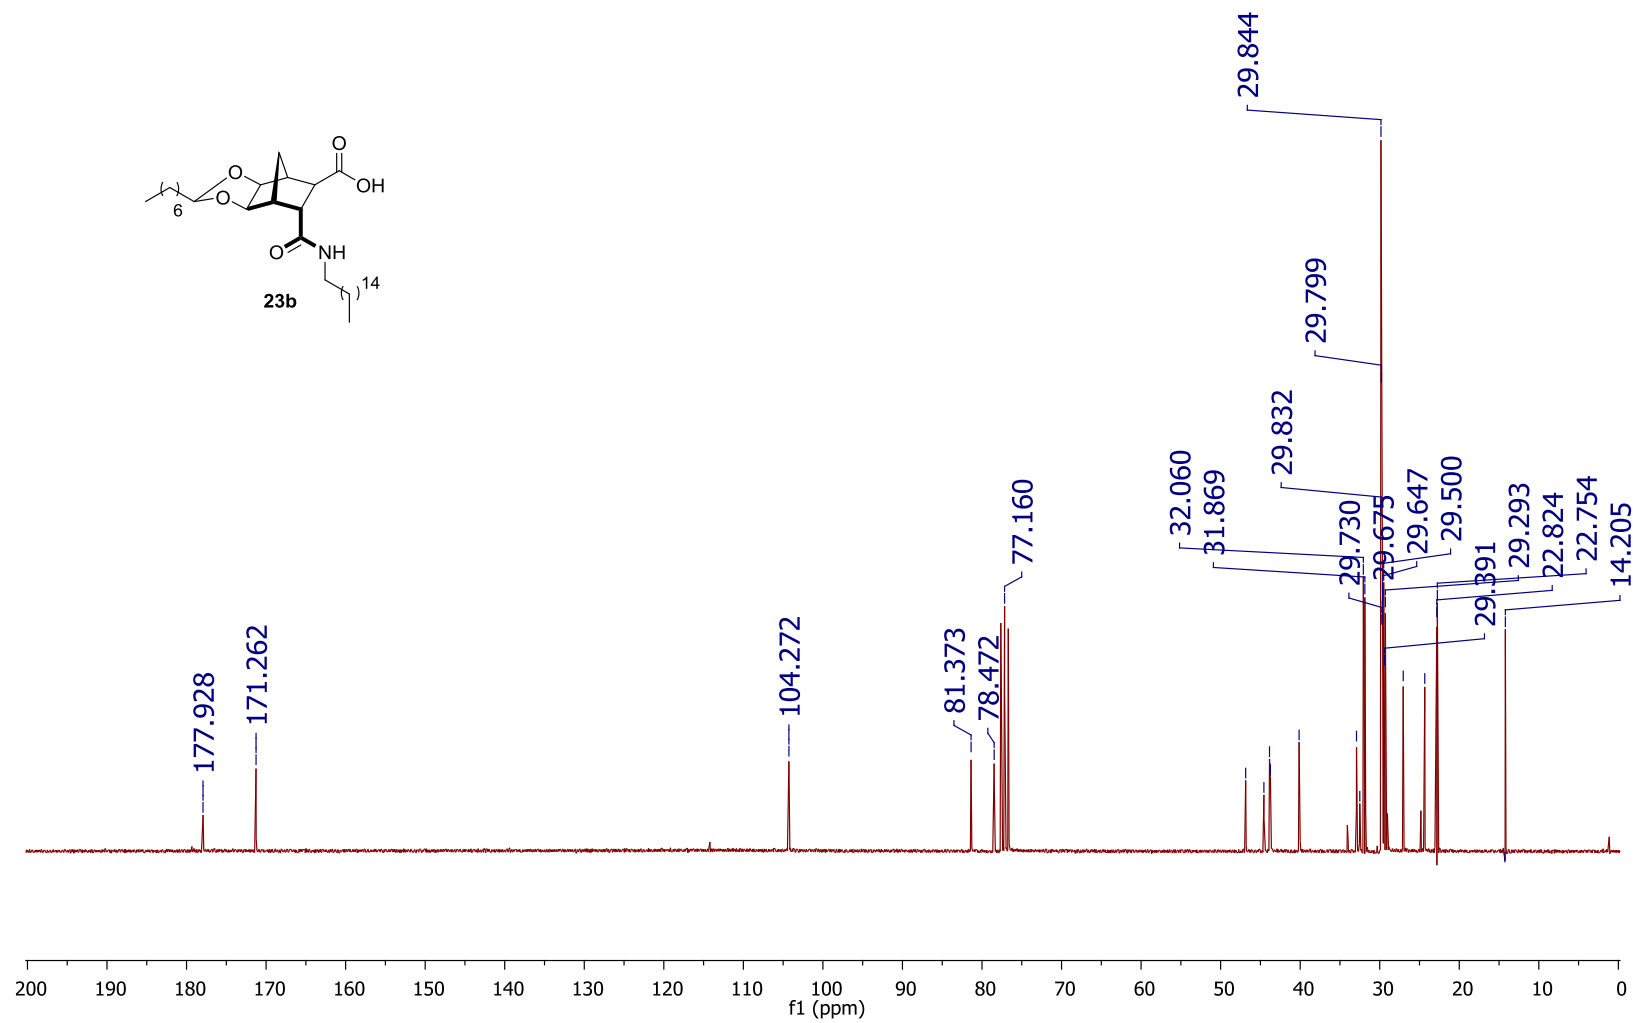

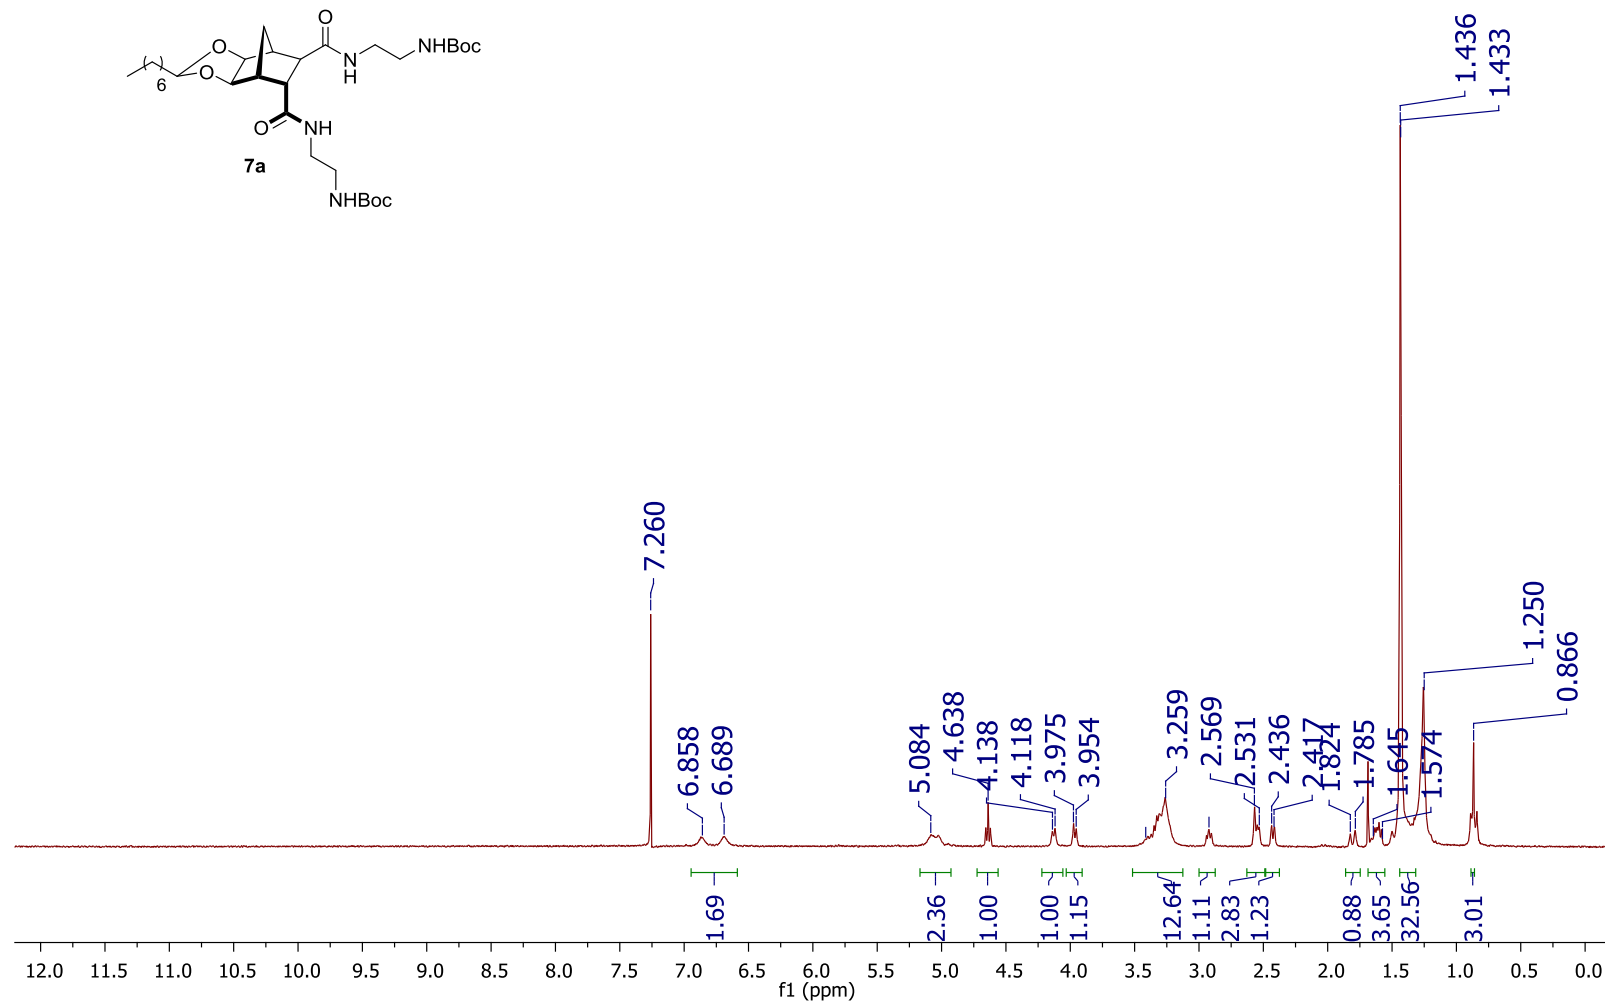

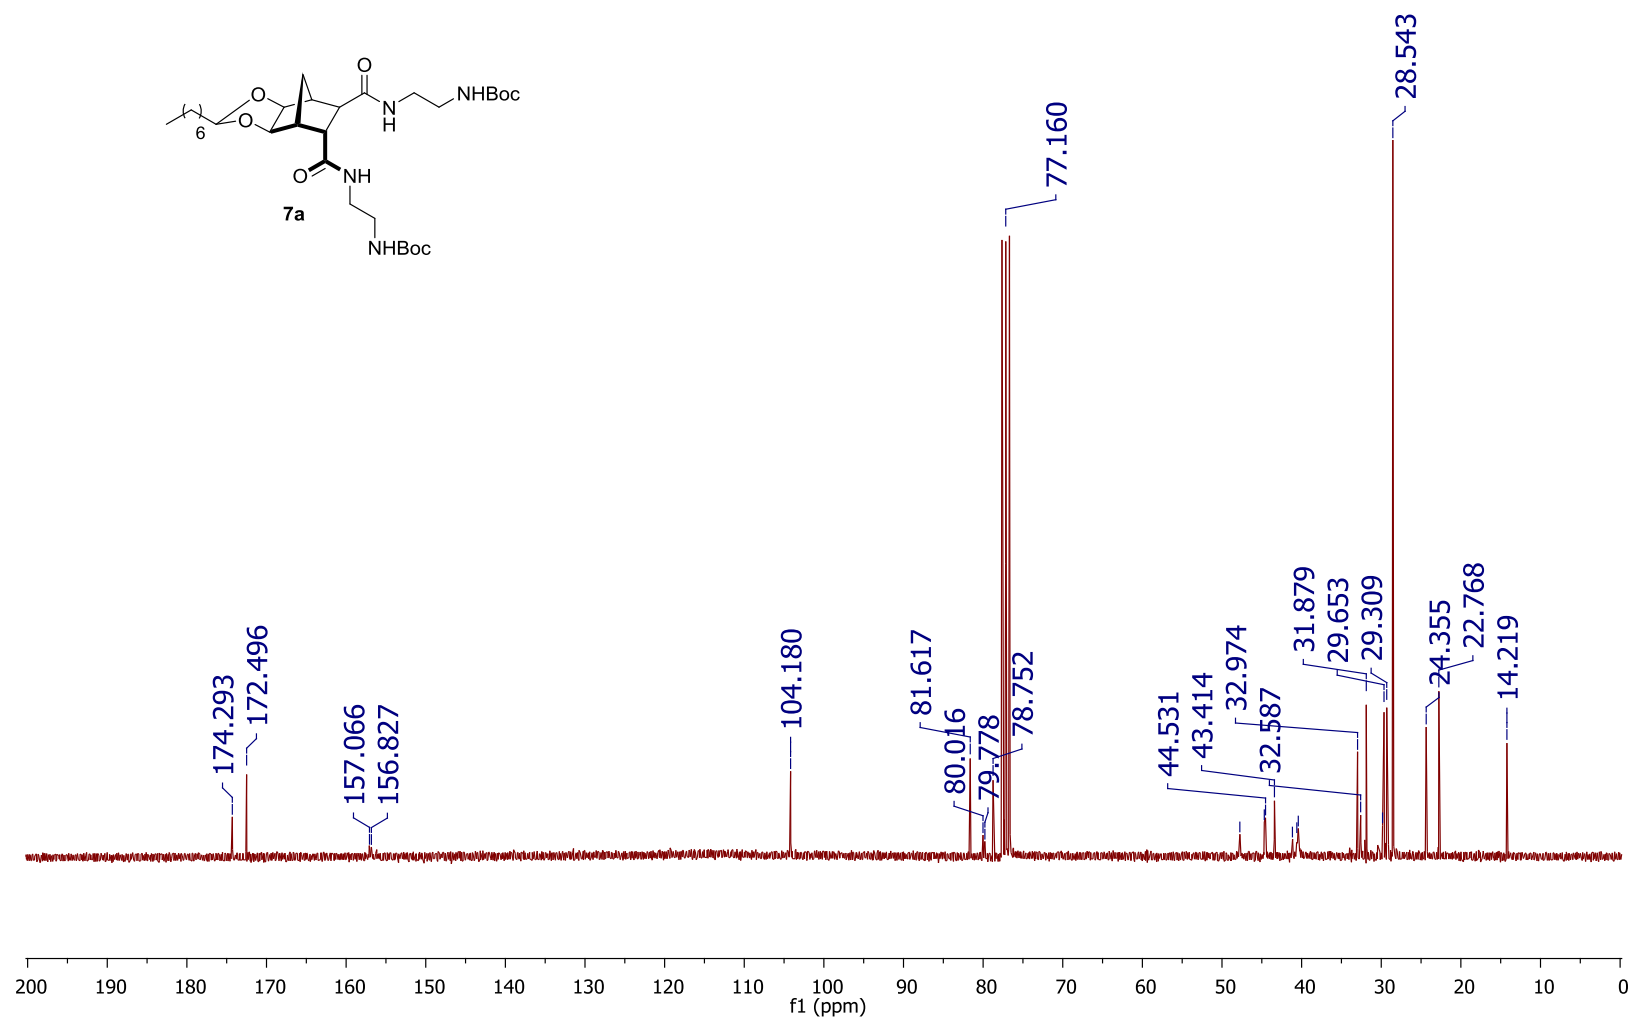

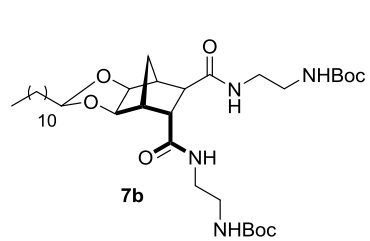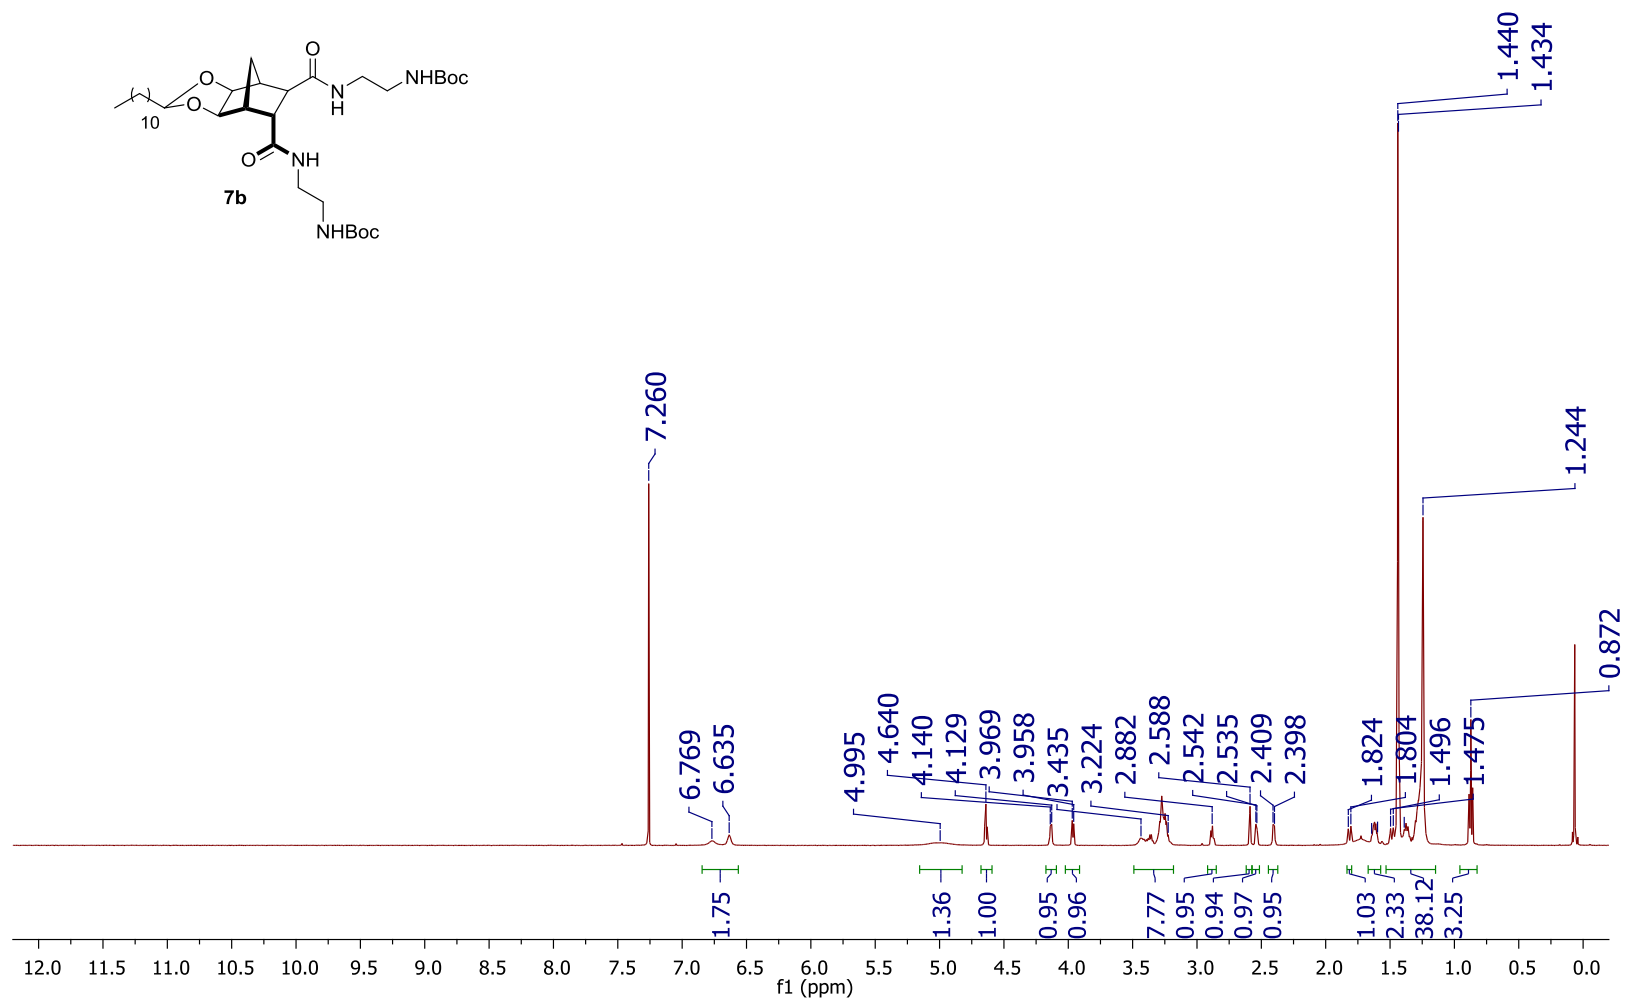

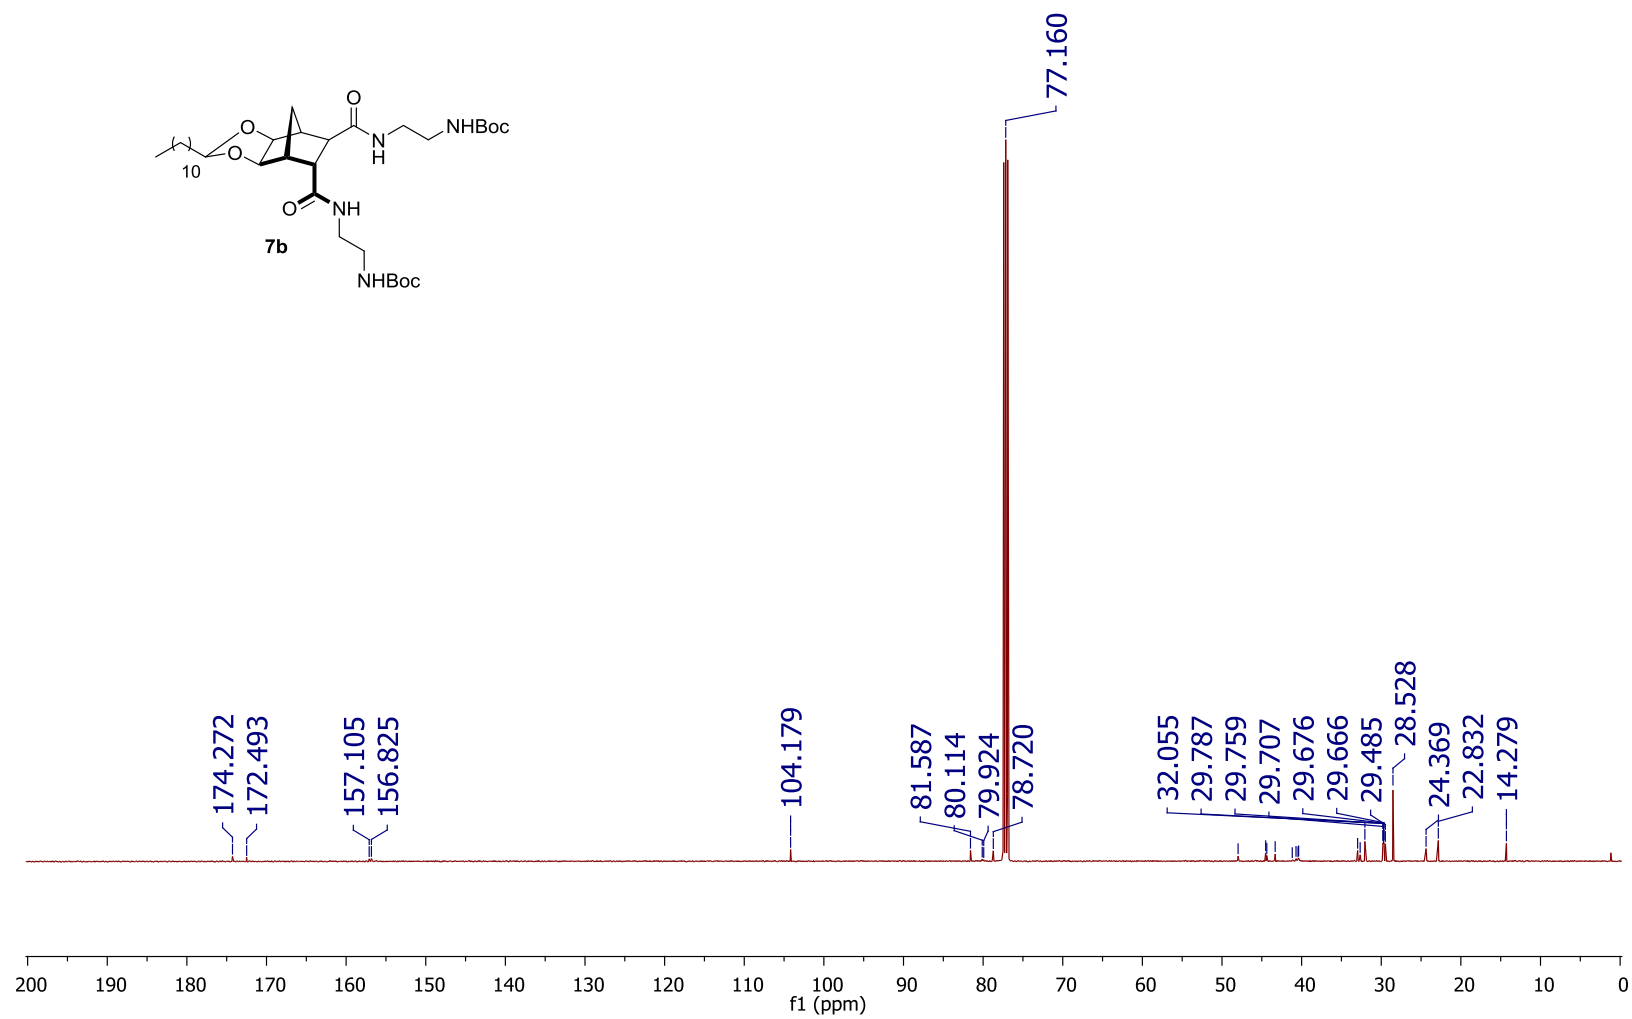

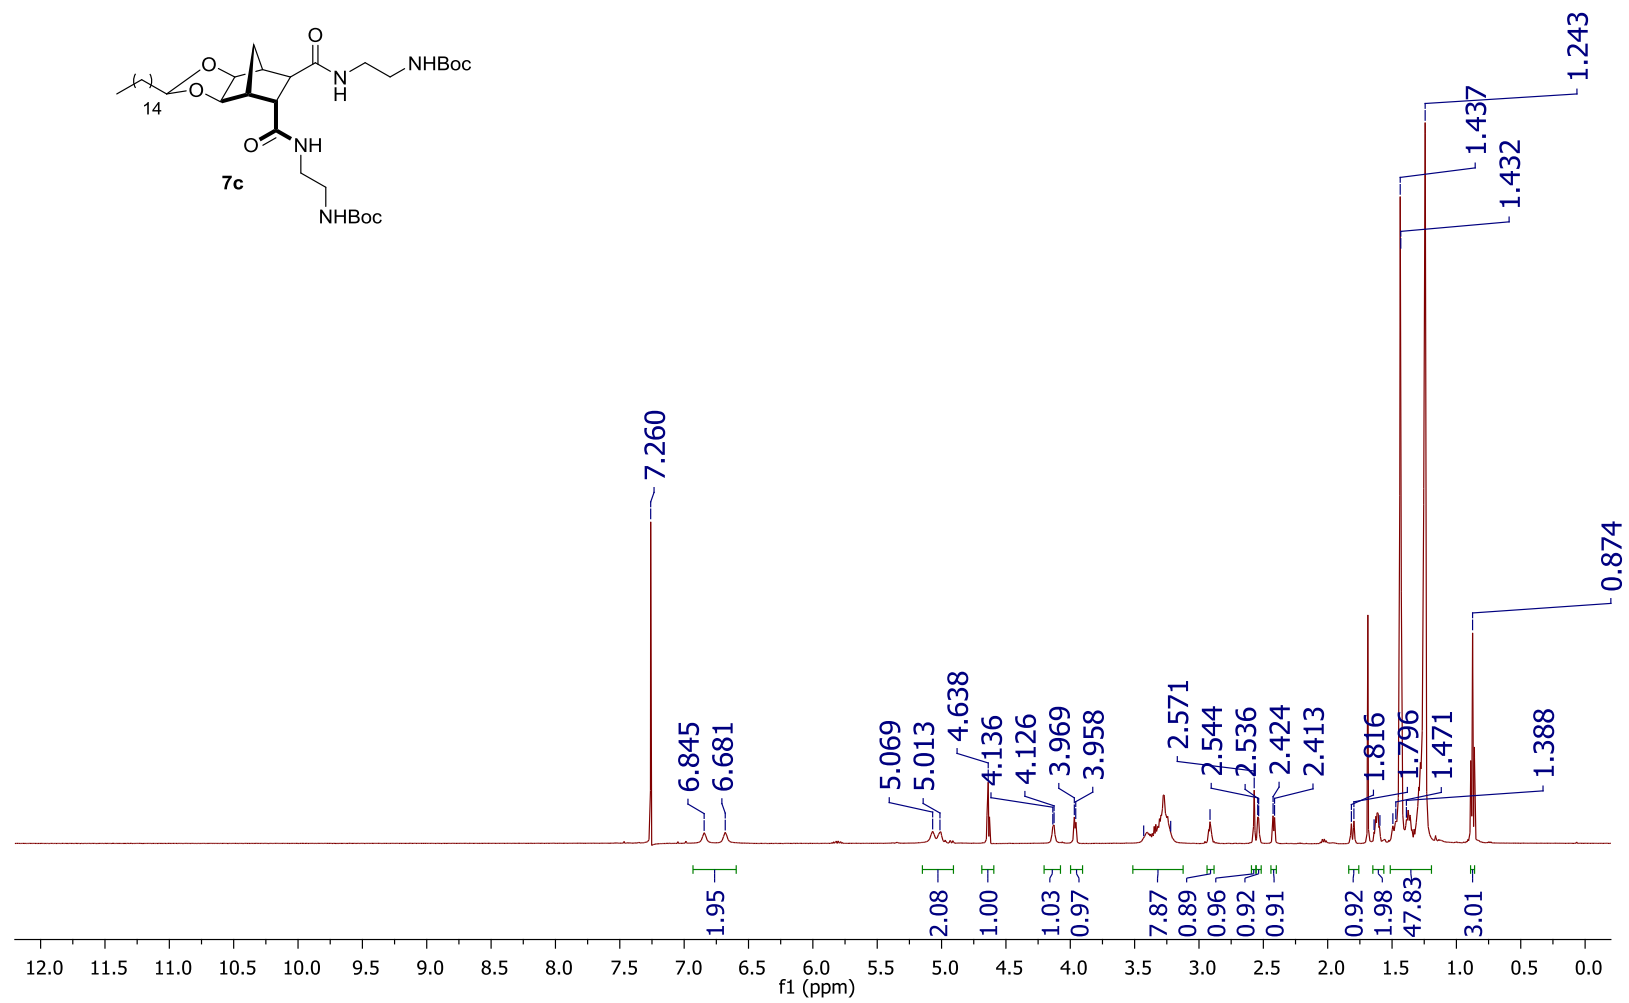

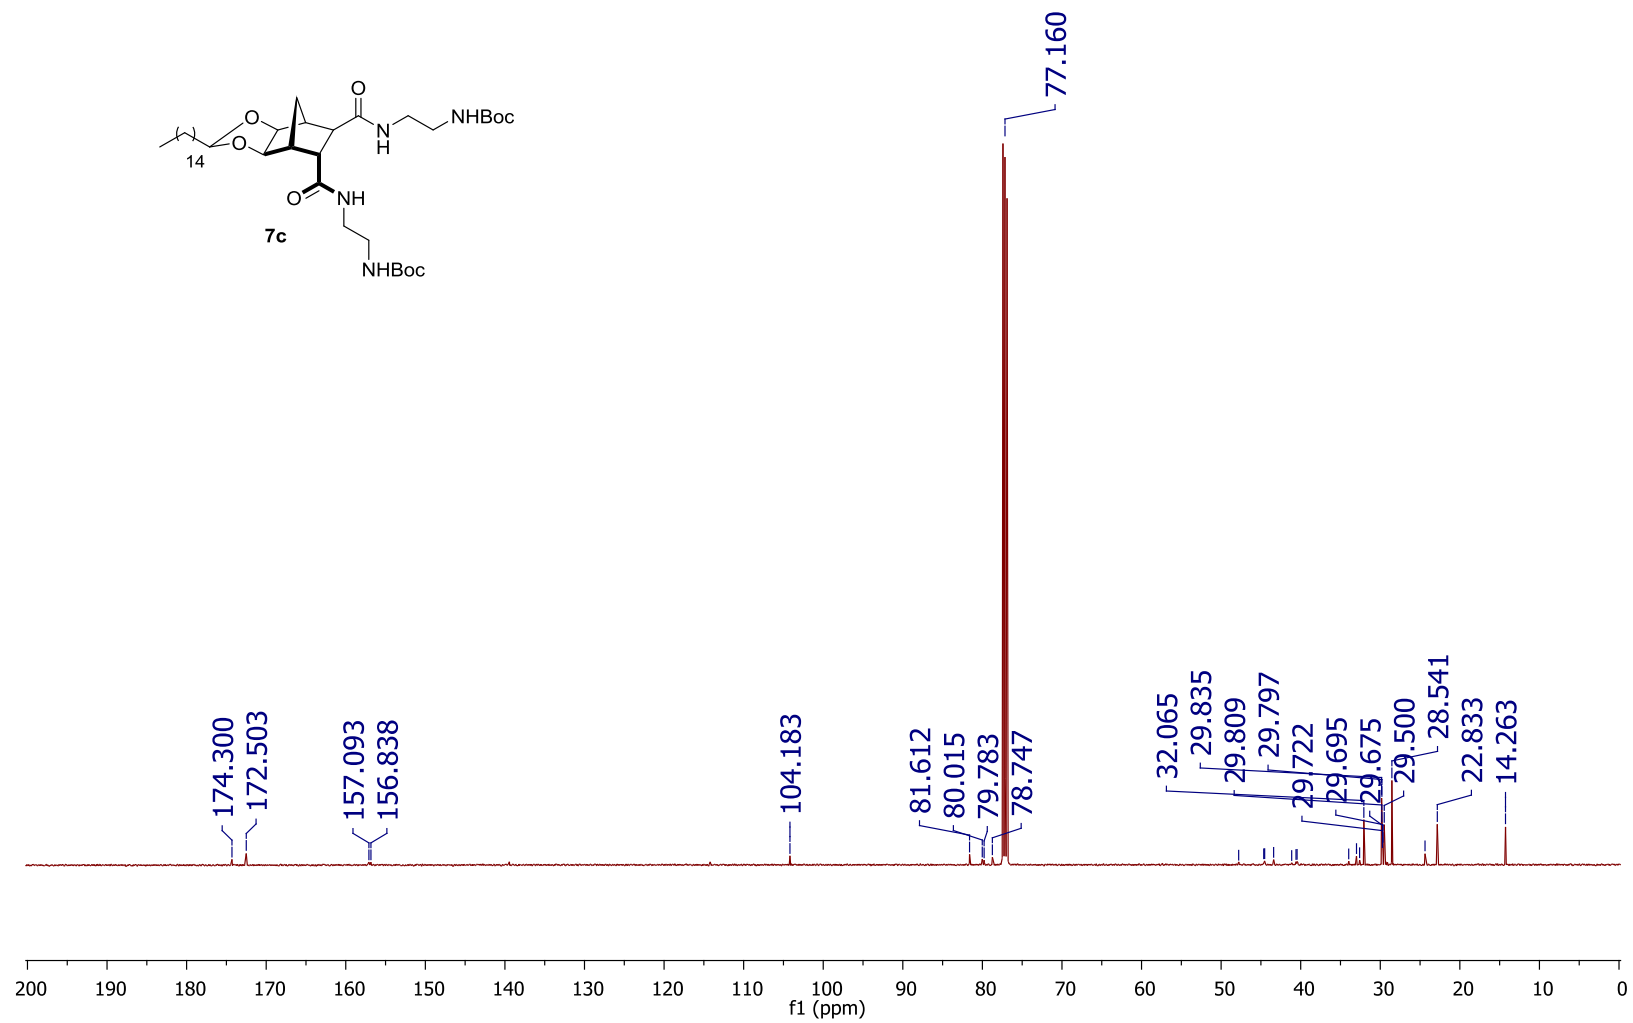

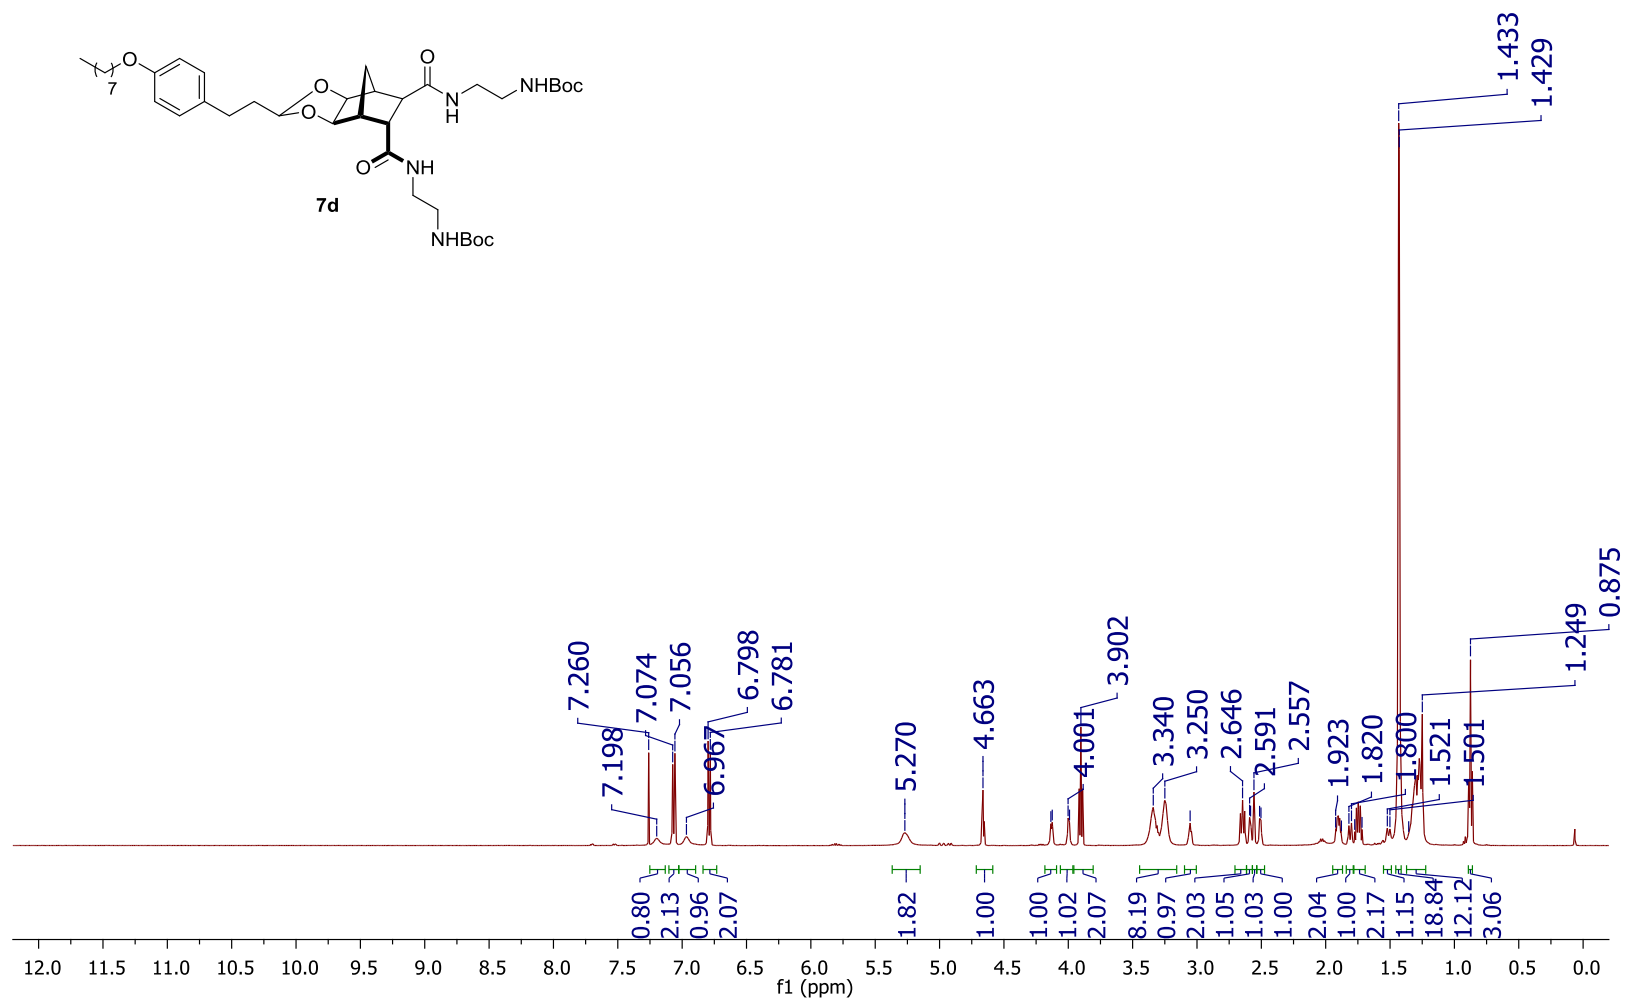

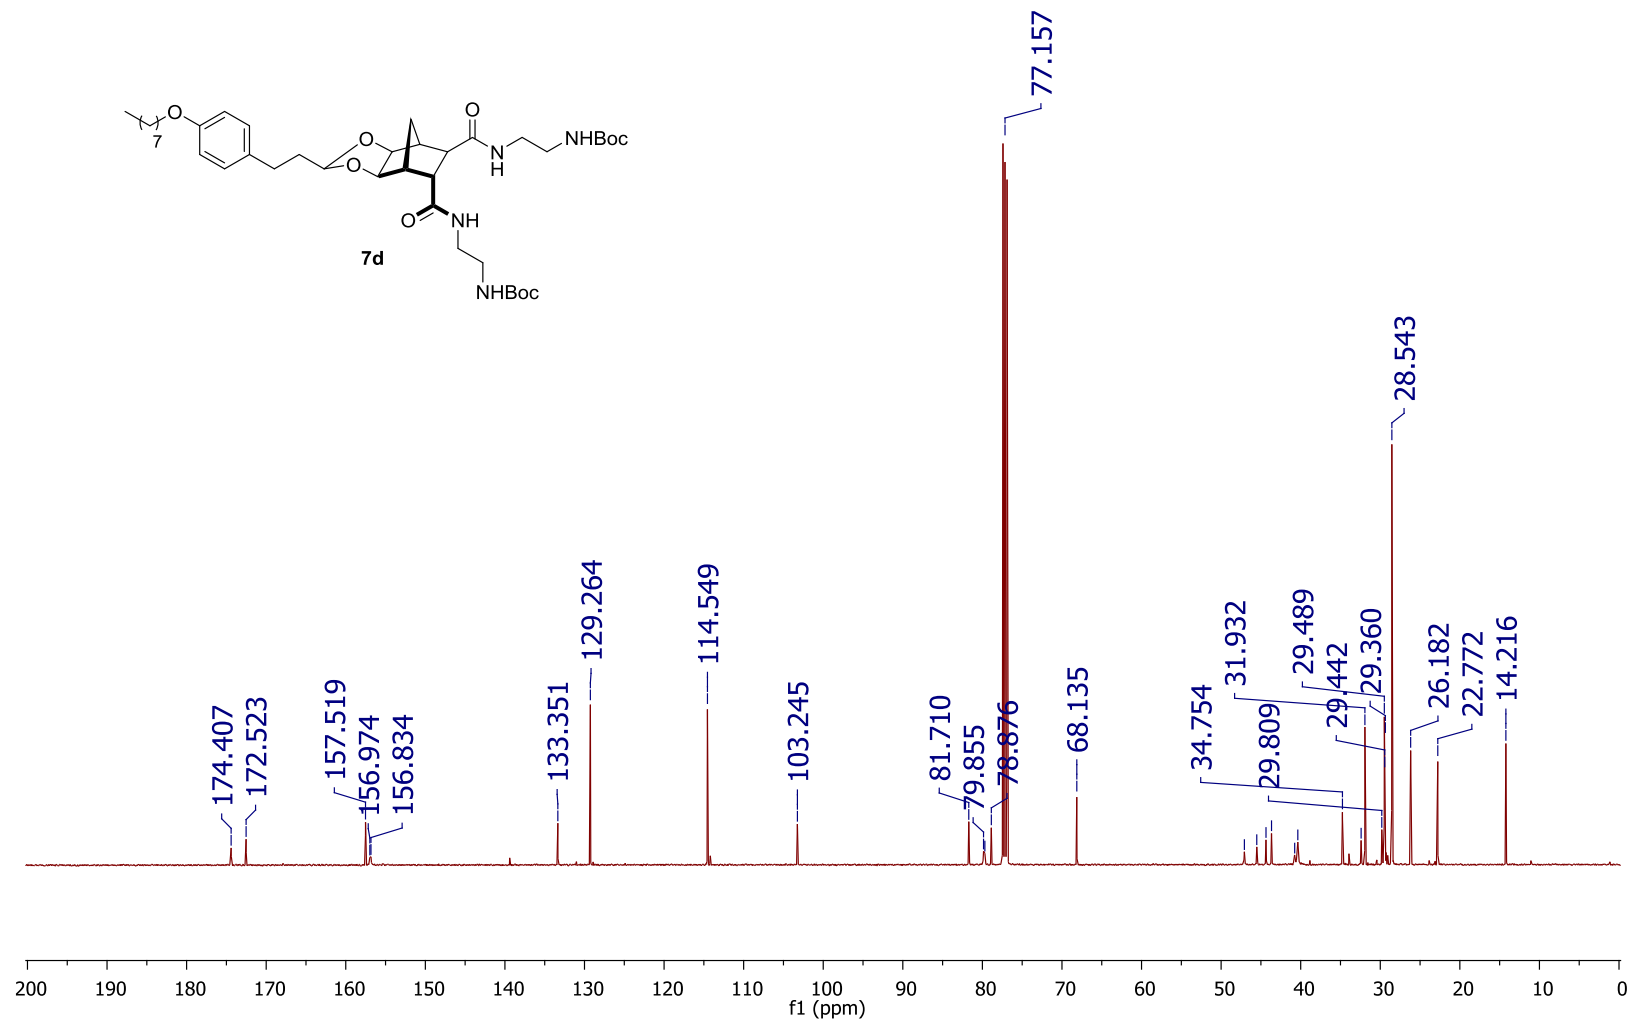

SMH07-059C  
 SMH07-059C - 1H  
 PROTON CDCl3 {C:\Data\_500\Shane} nmr 3

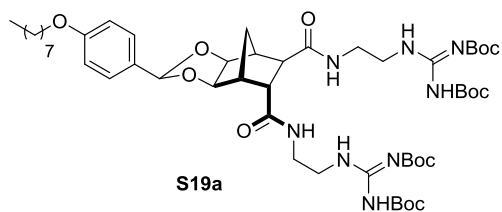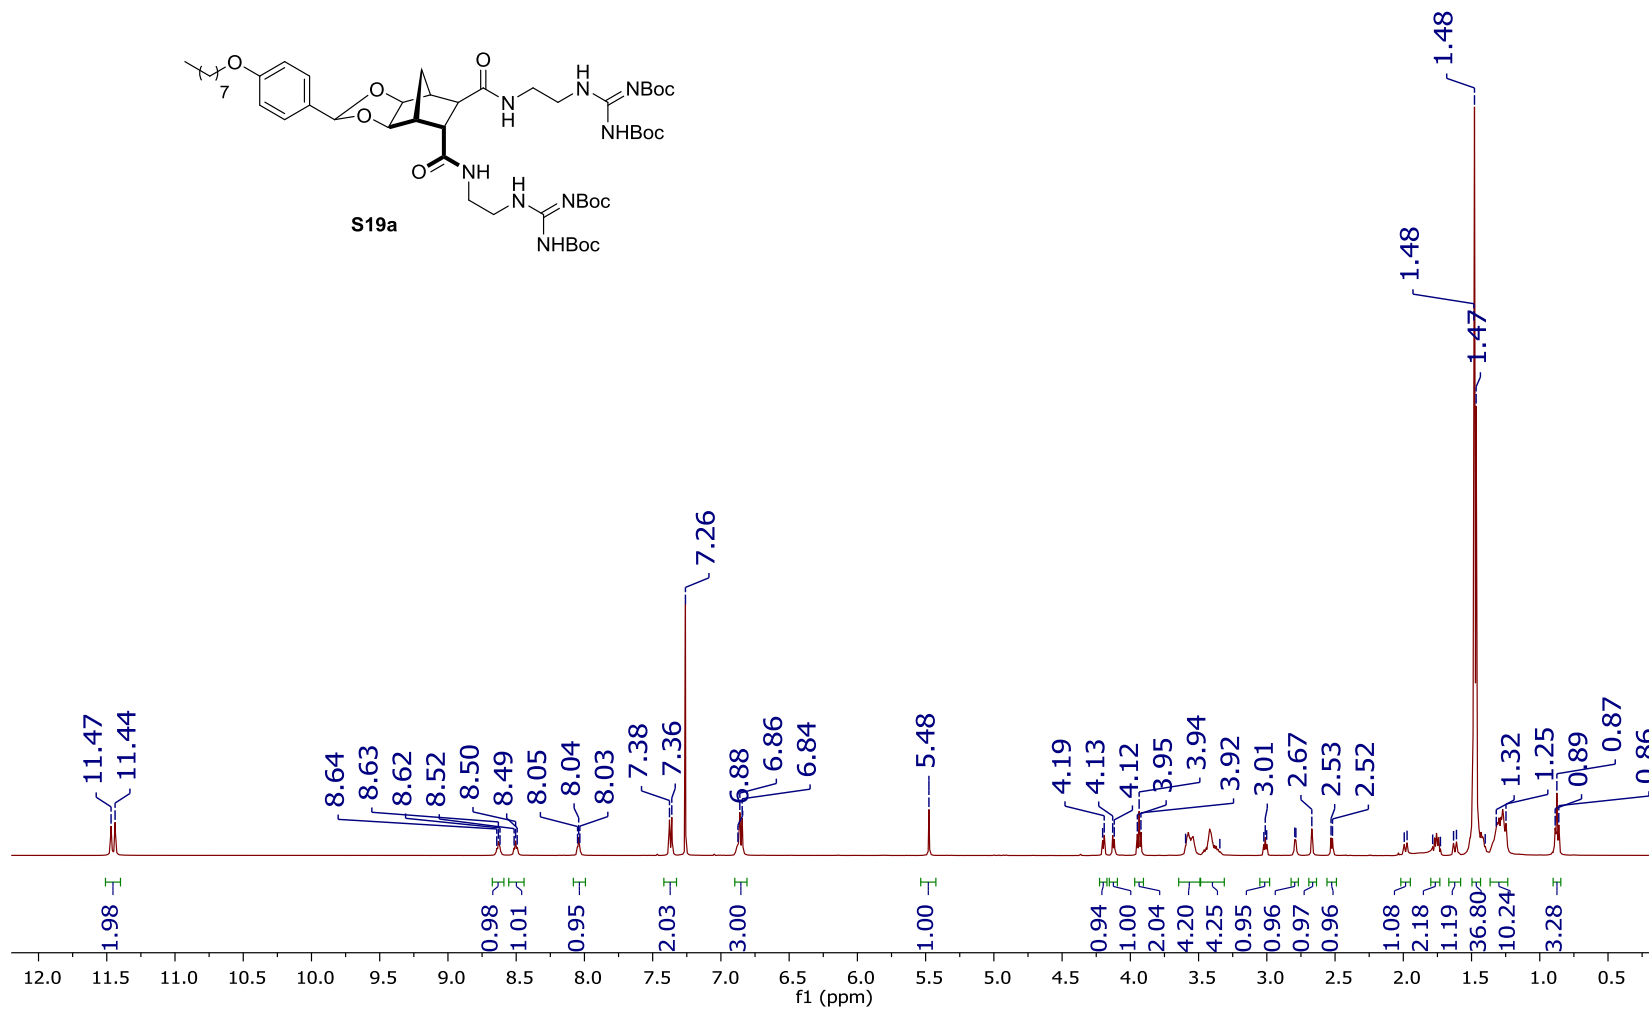

SMH07-059C  
 SMH07-059C - <sup>13</sup>C  
 C13CPD CDCl<sub>3</sub> {C:\Data\_500\Shane} nmr 3

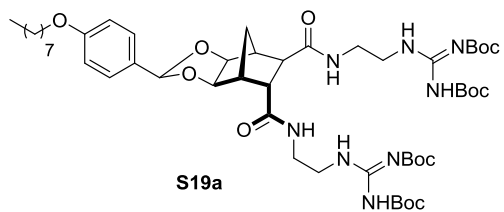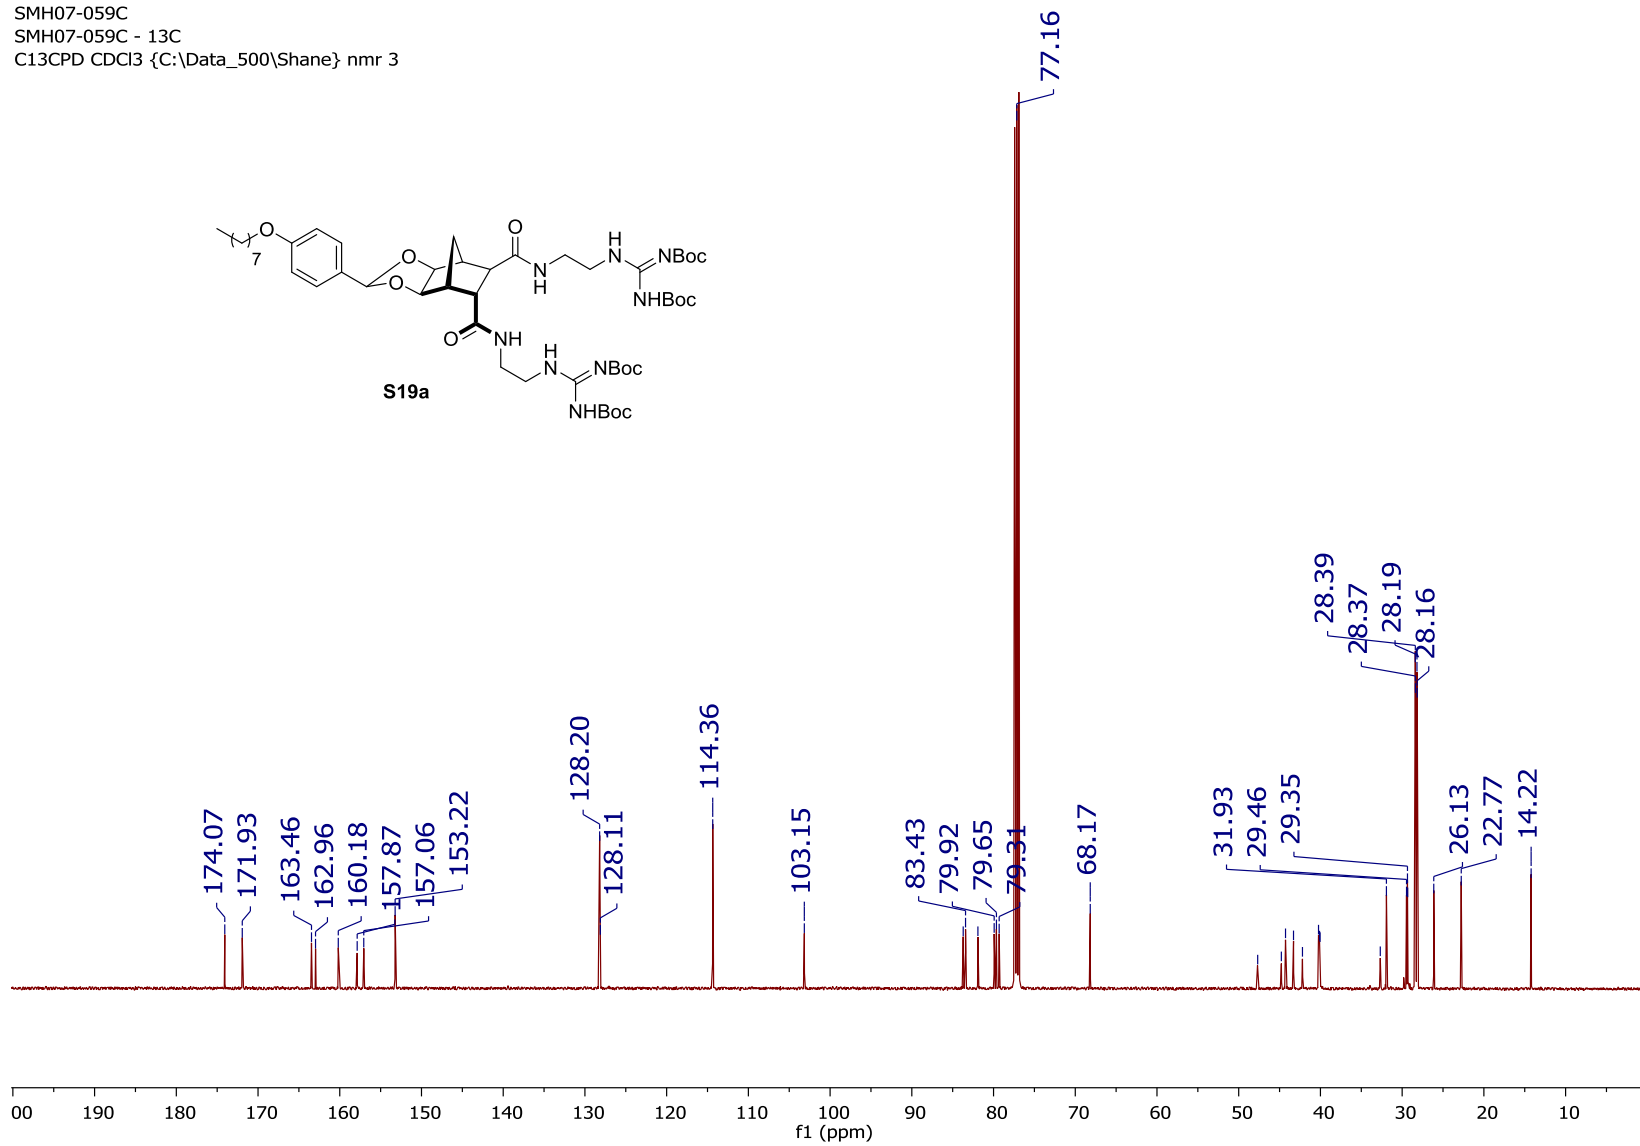

Endo phenyl (minor isomer)  
SMH07-59B 1H

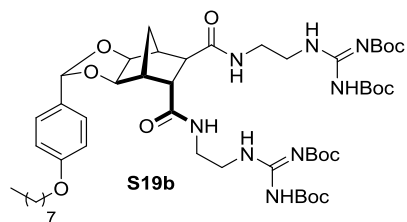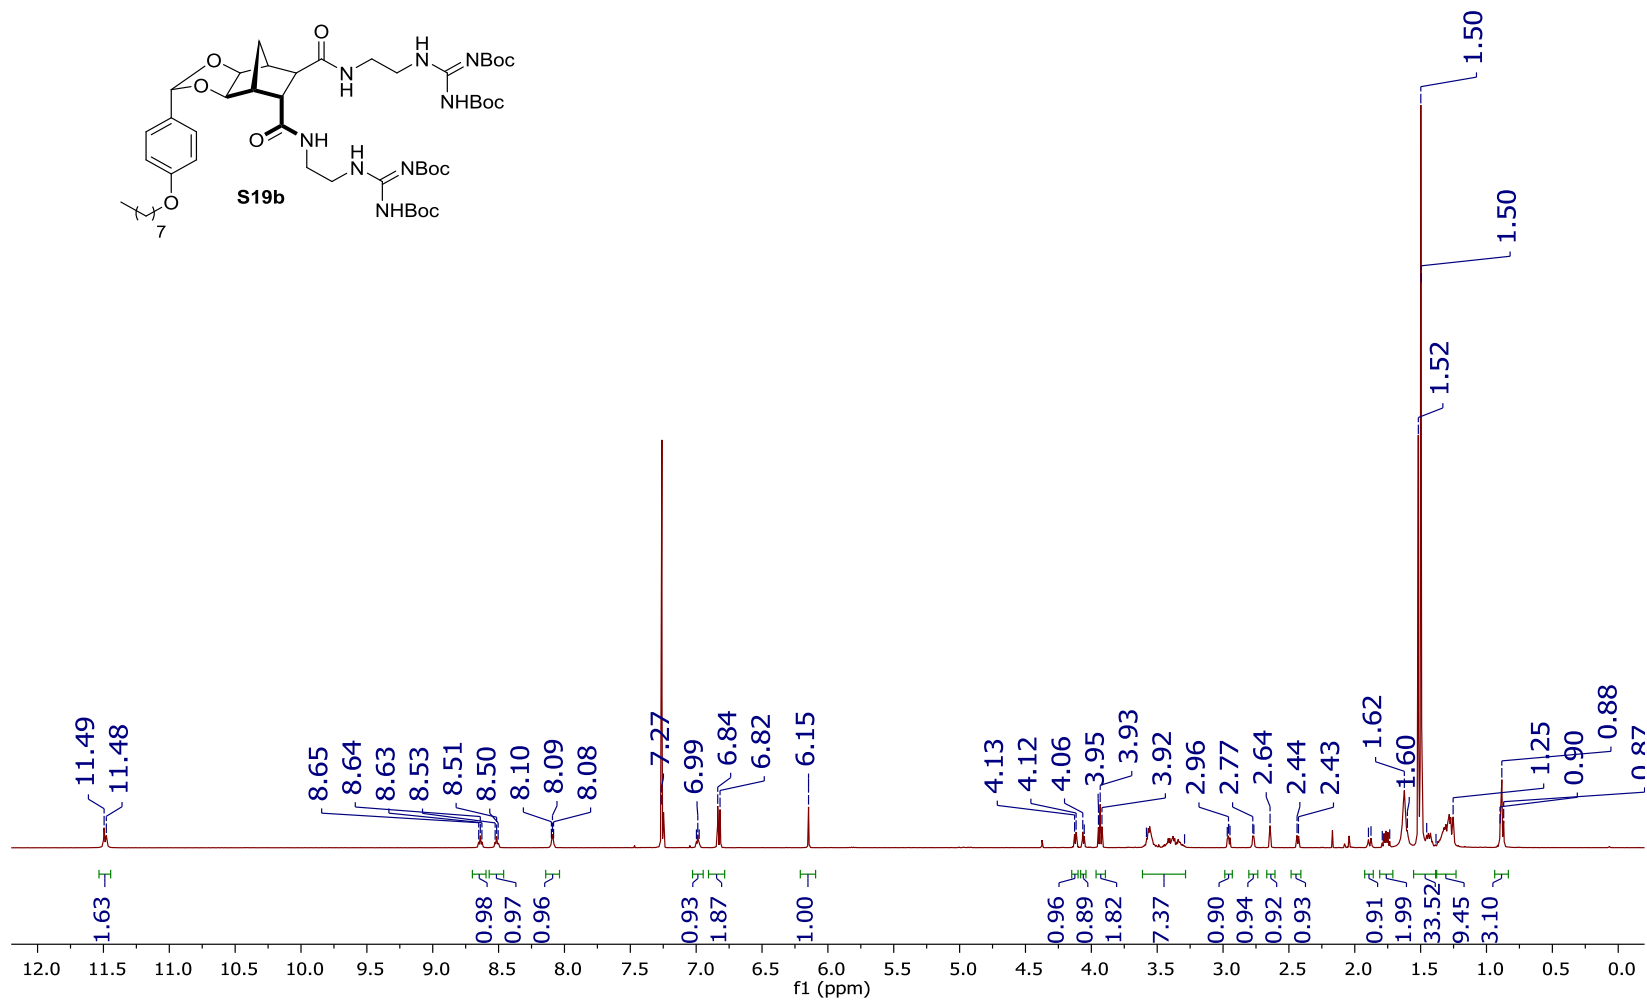

SMH07-059B  
 SMH07-059B - <sup>13</sup>C  
 C13CPD CDCl<sub>3</sub> {C:\Data\_500\Shane} nmr 2

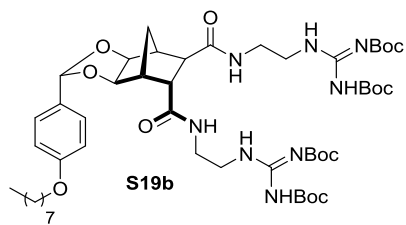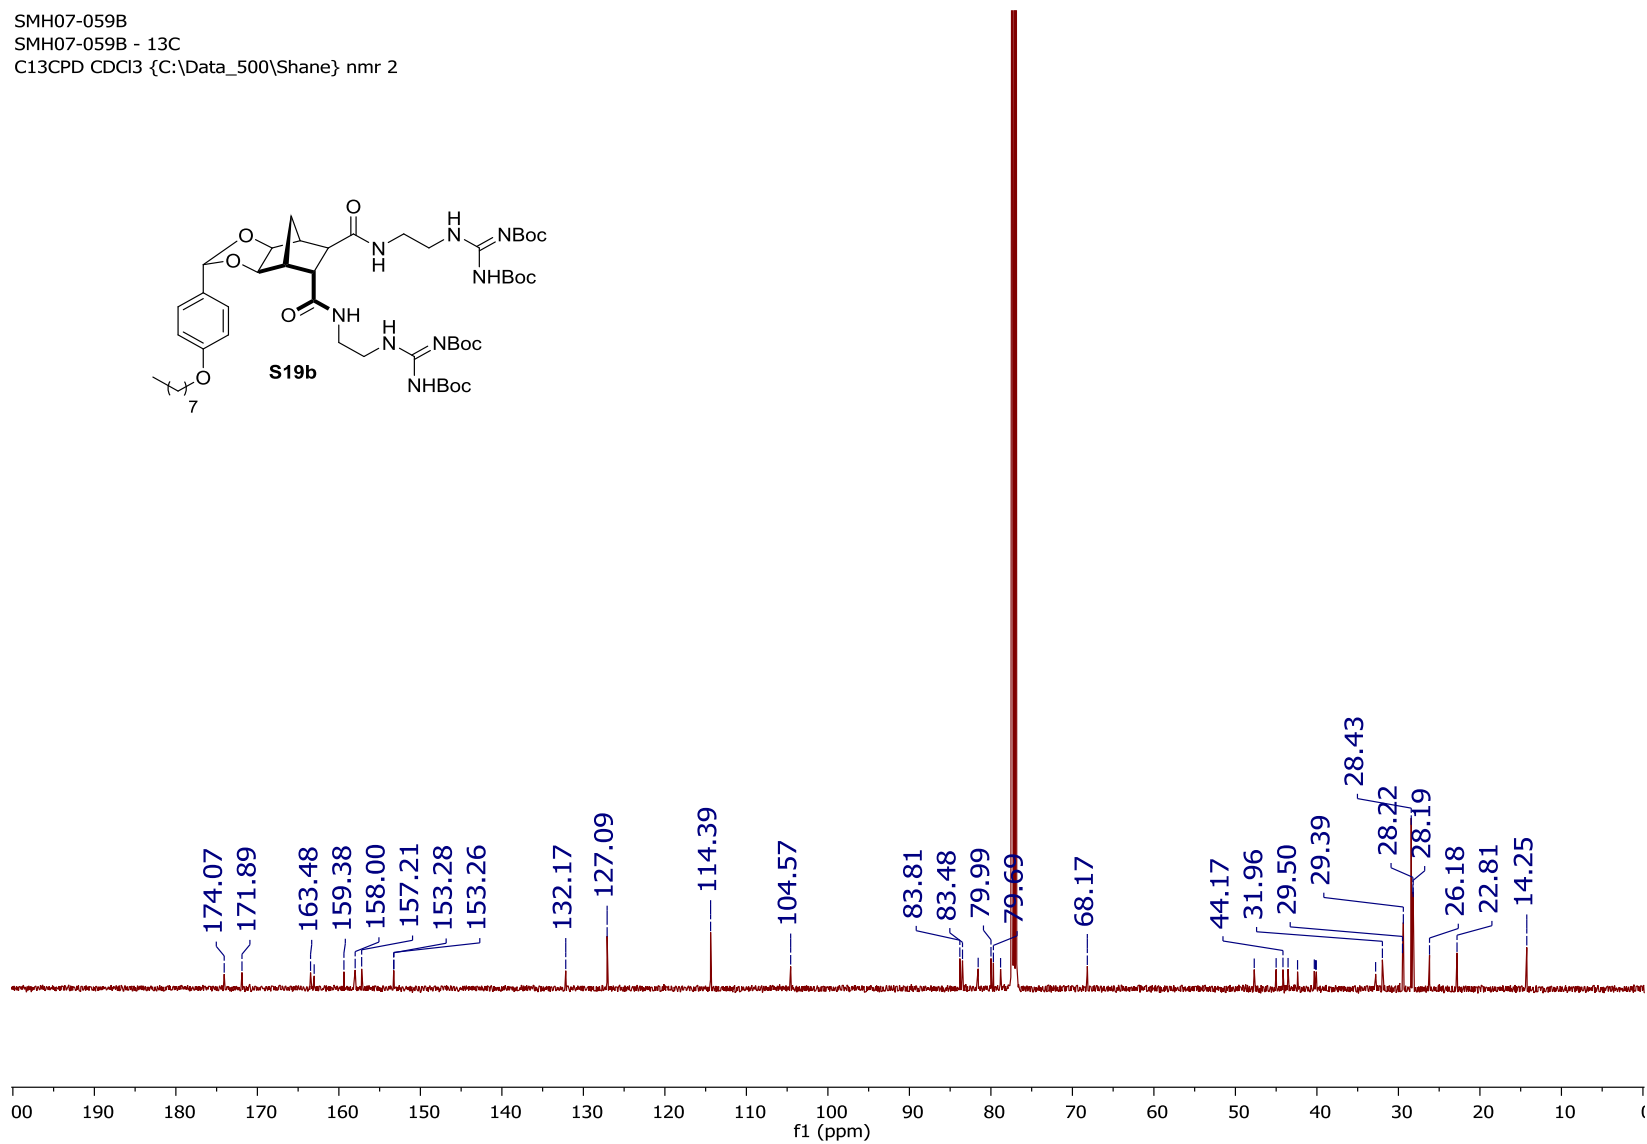

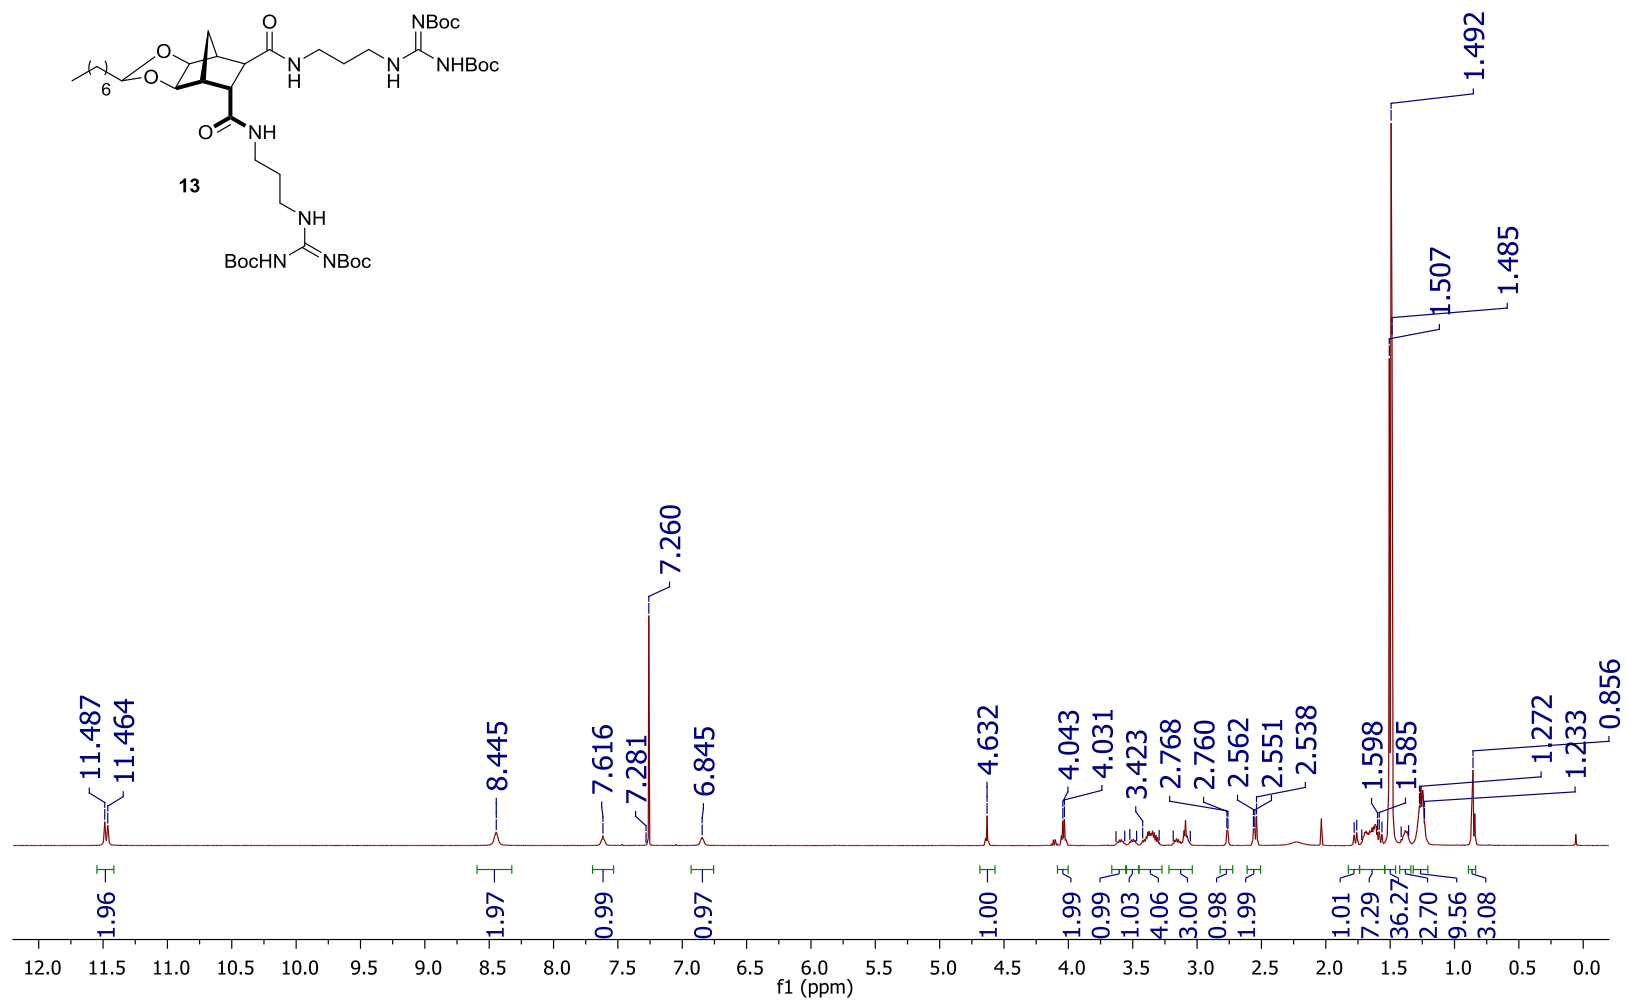

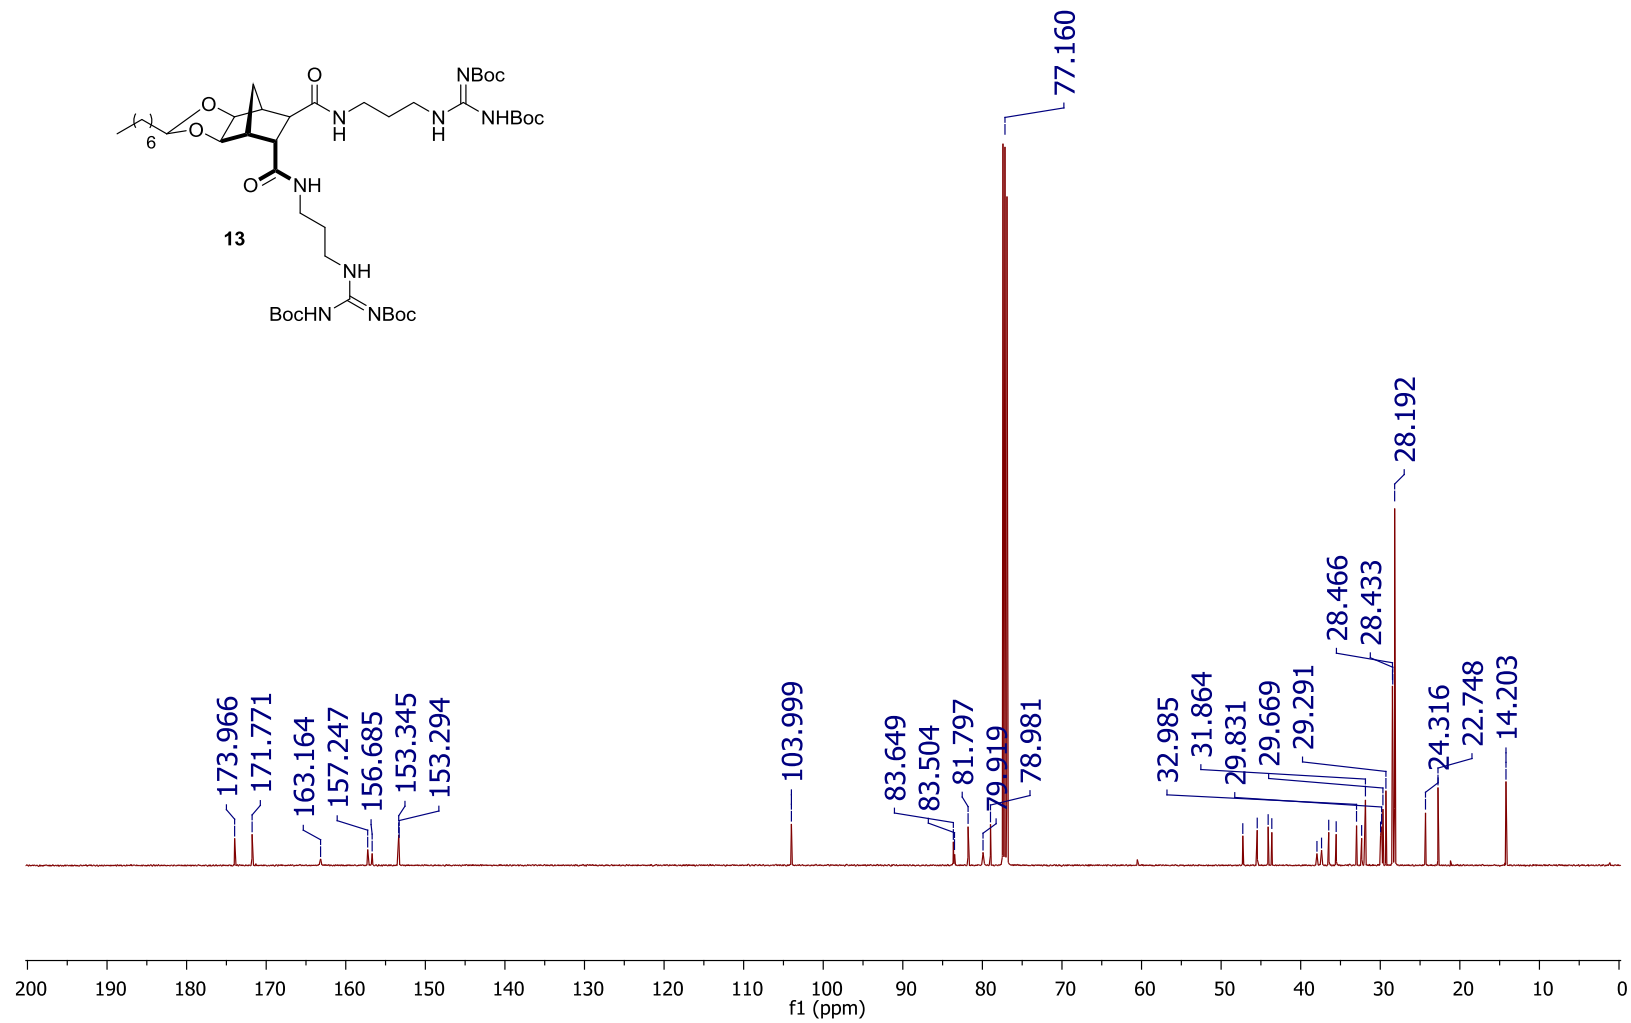

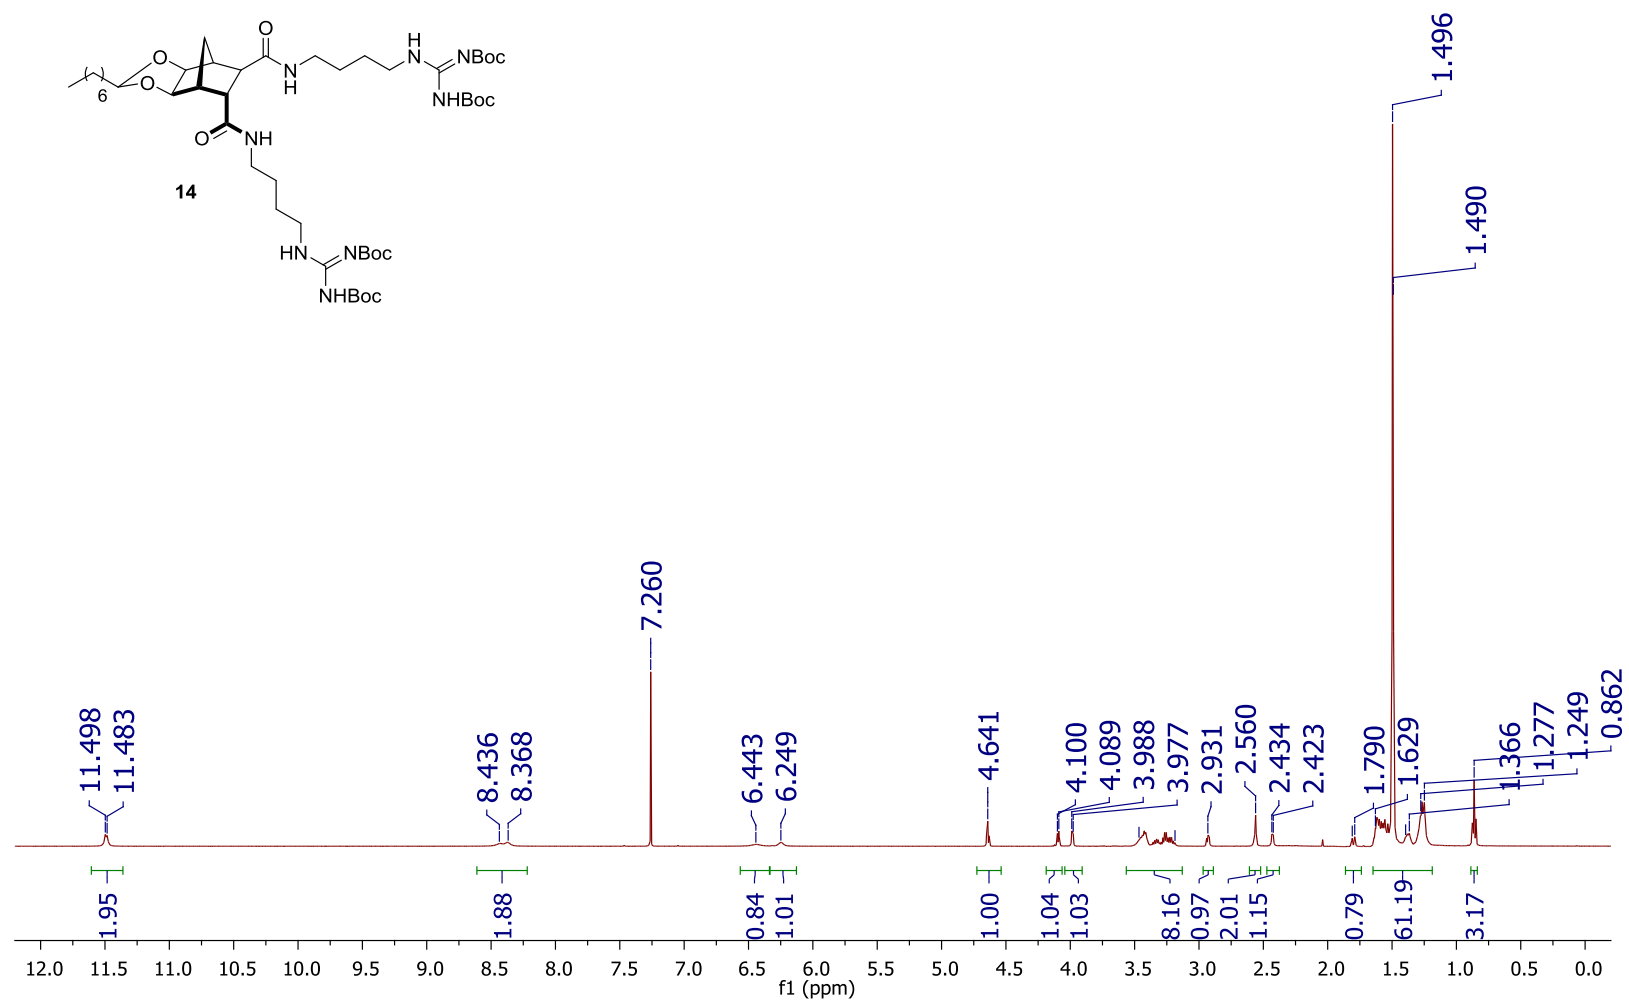

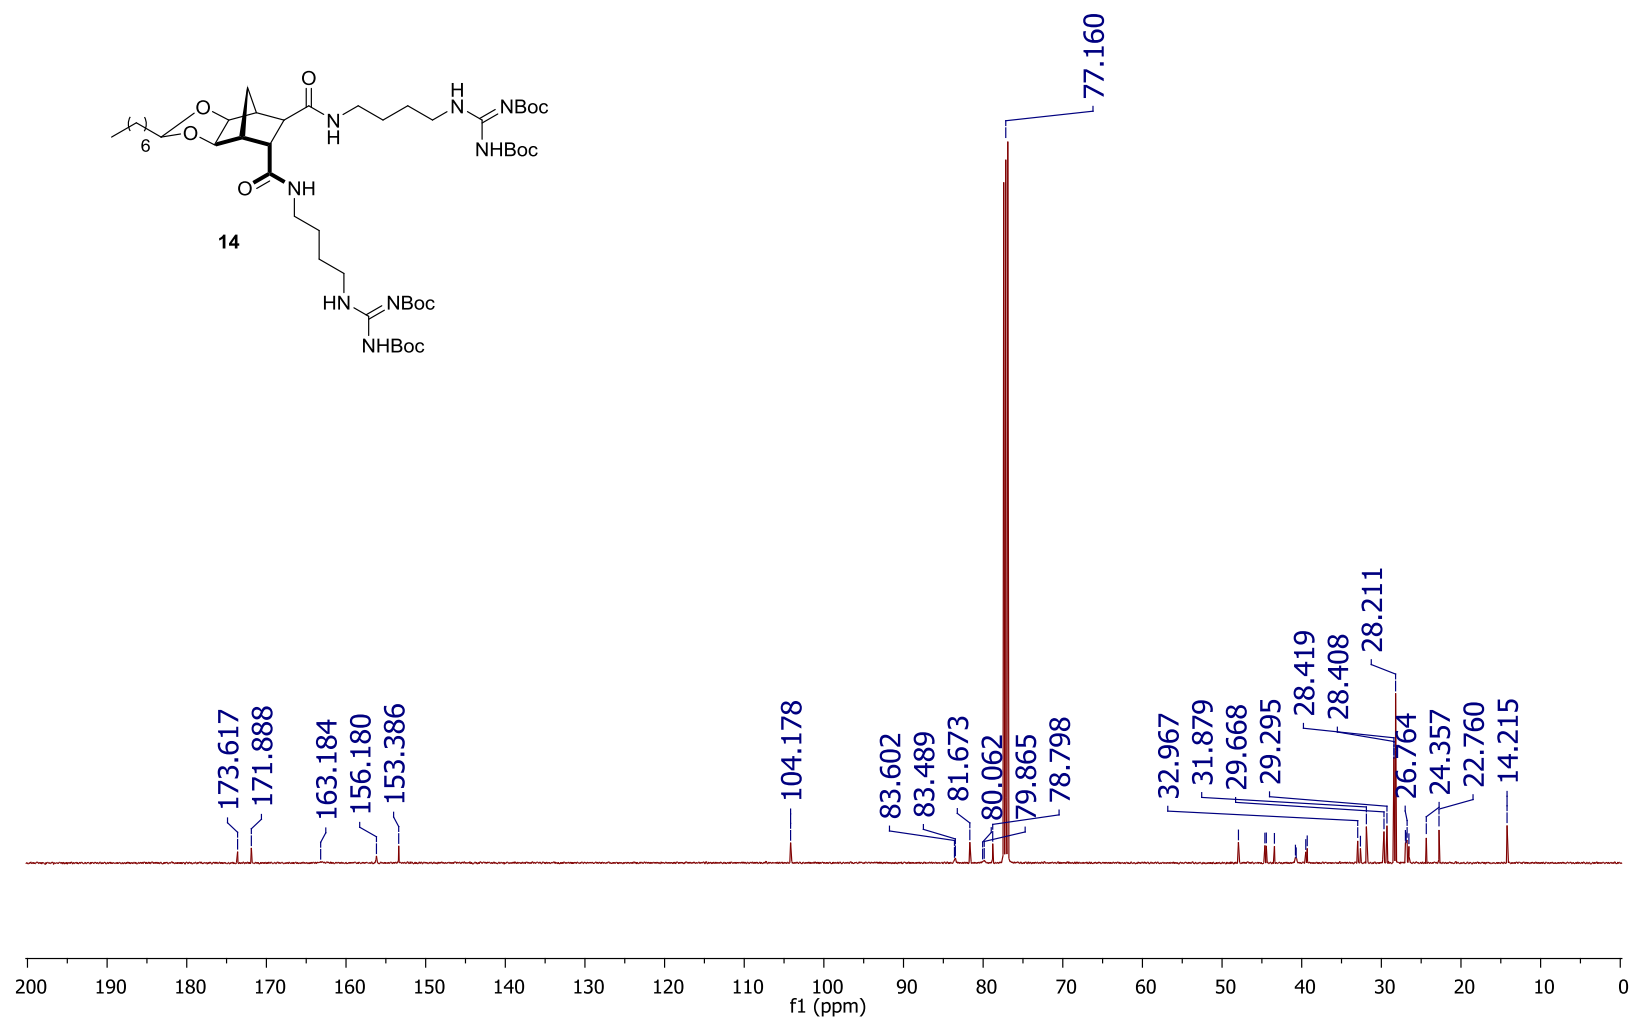



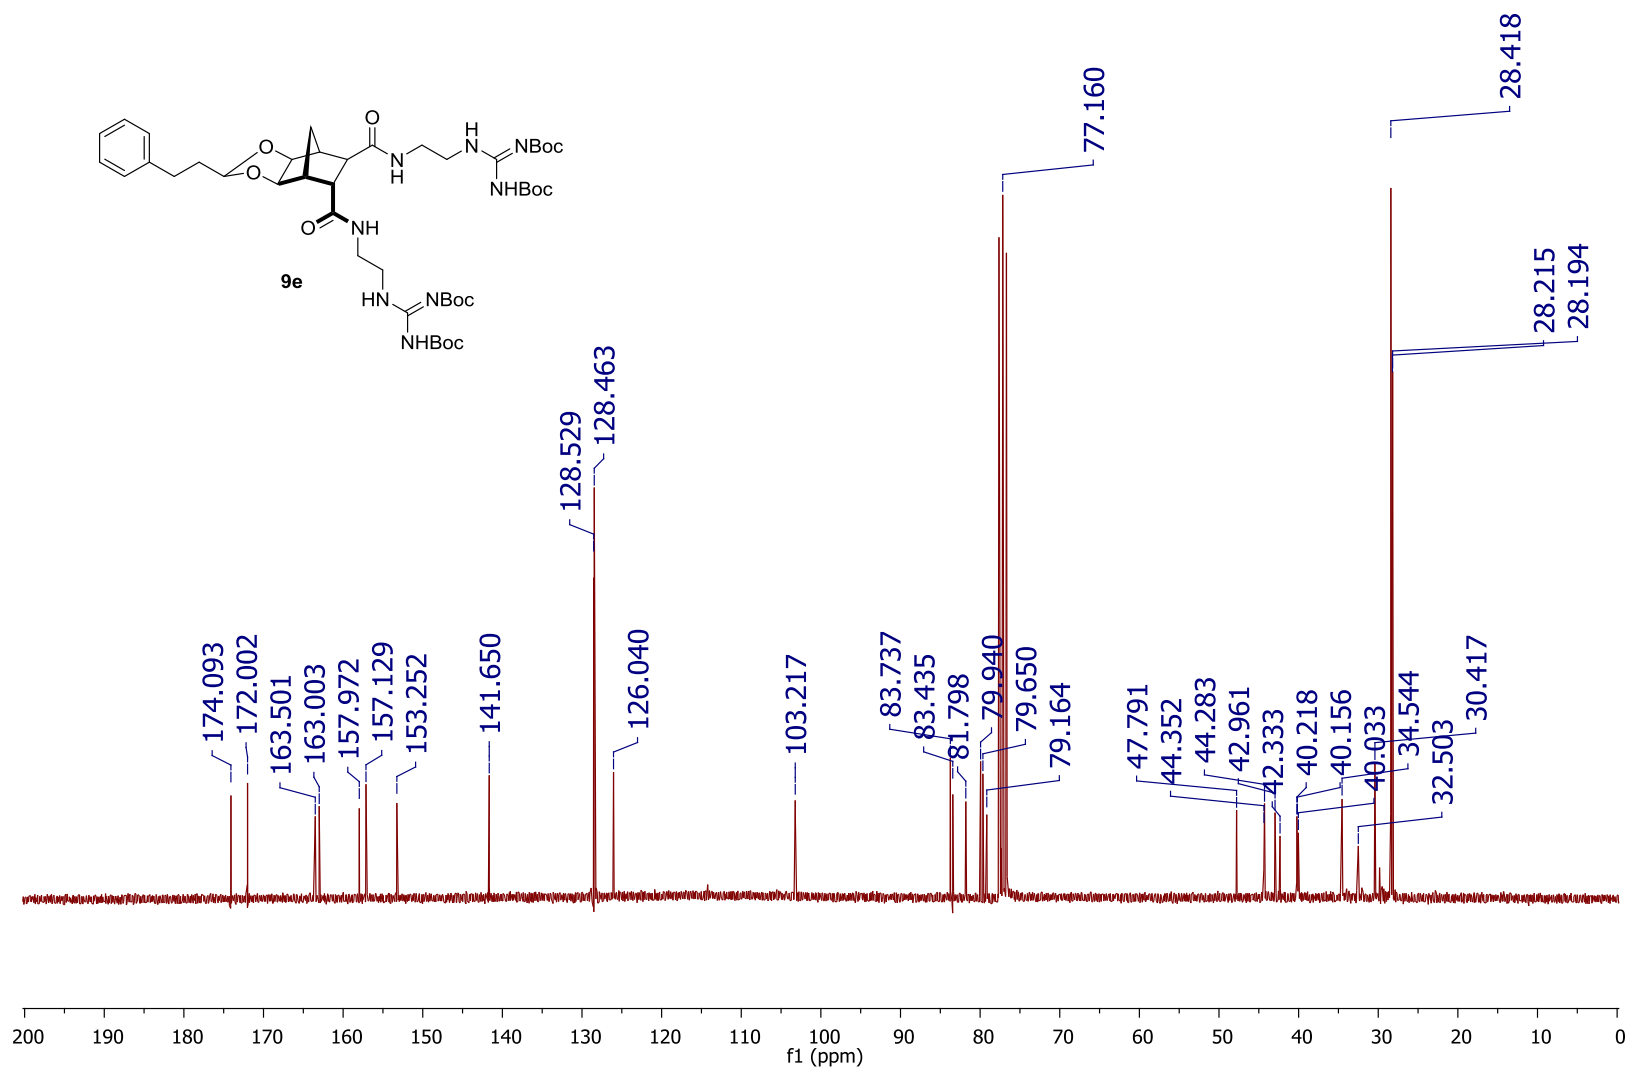

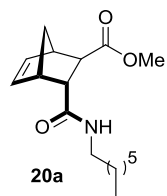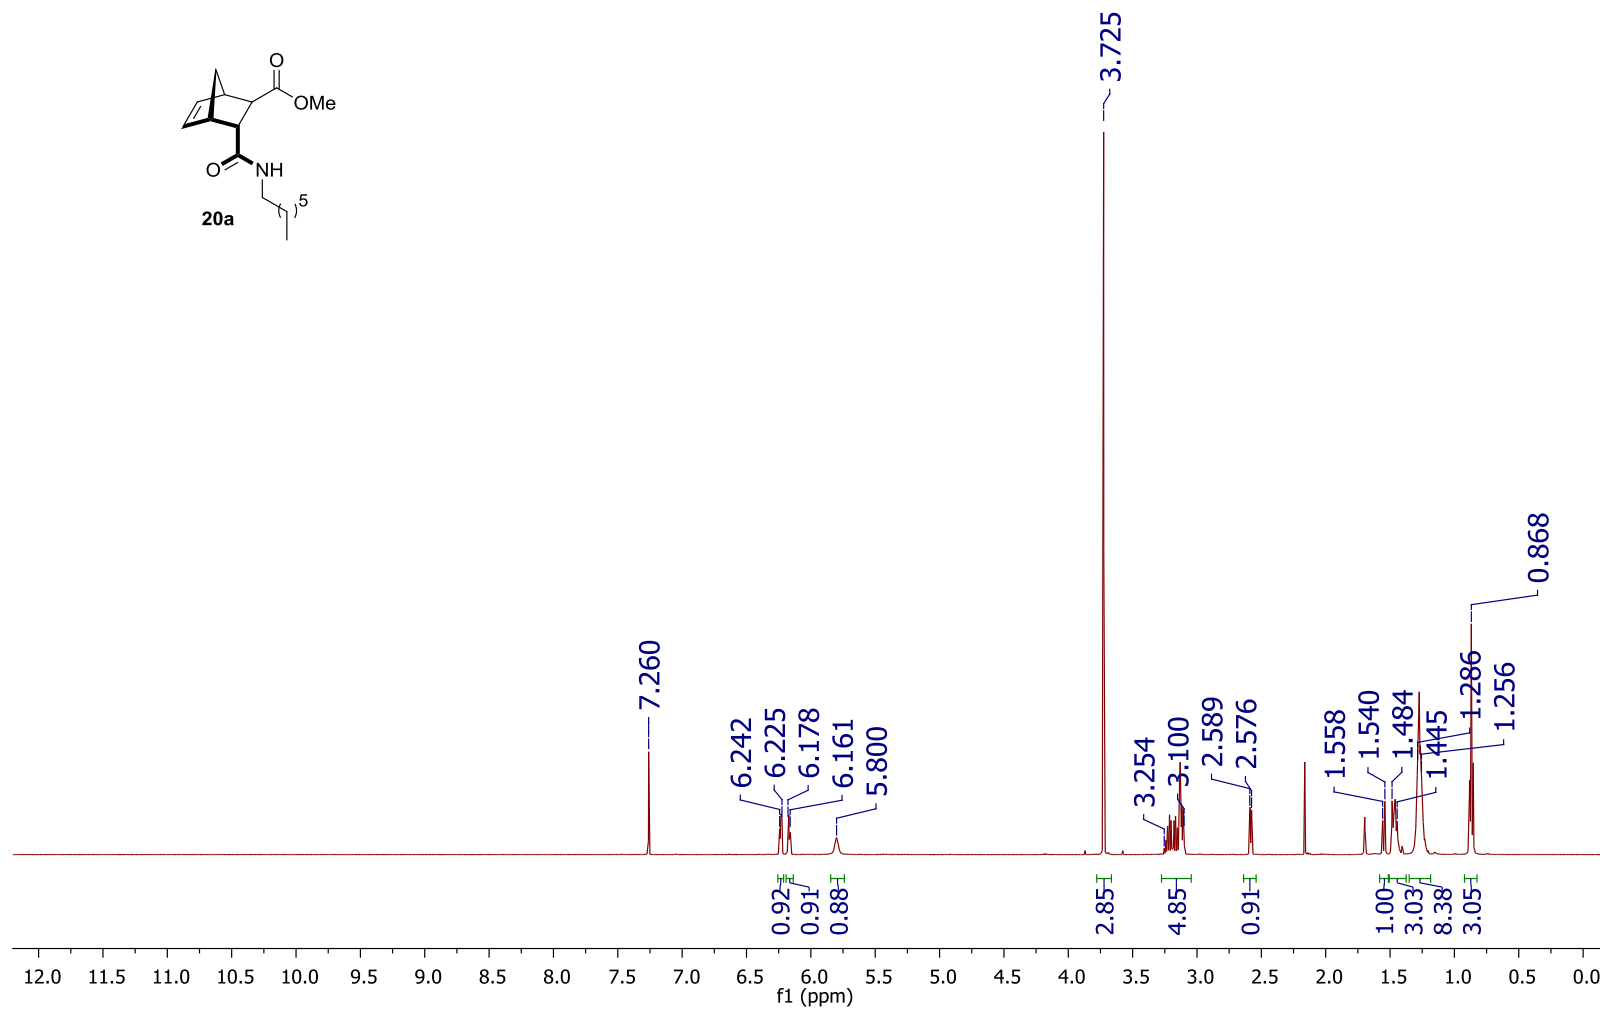

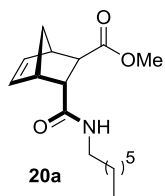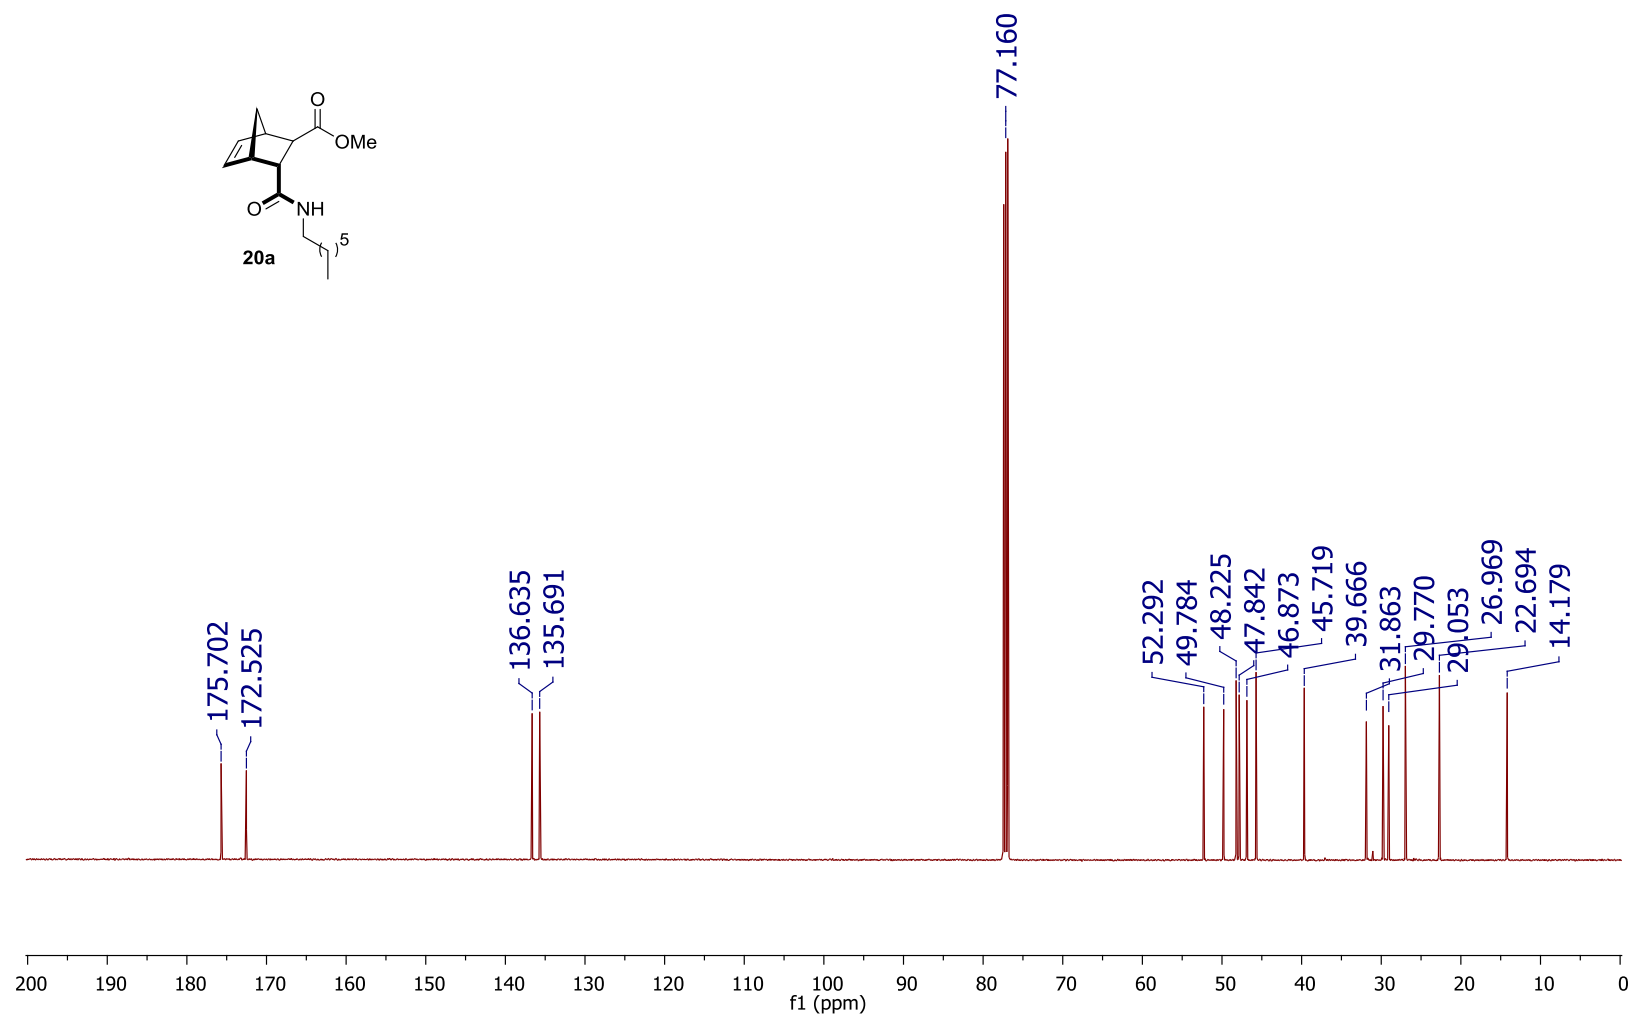

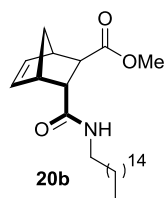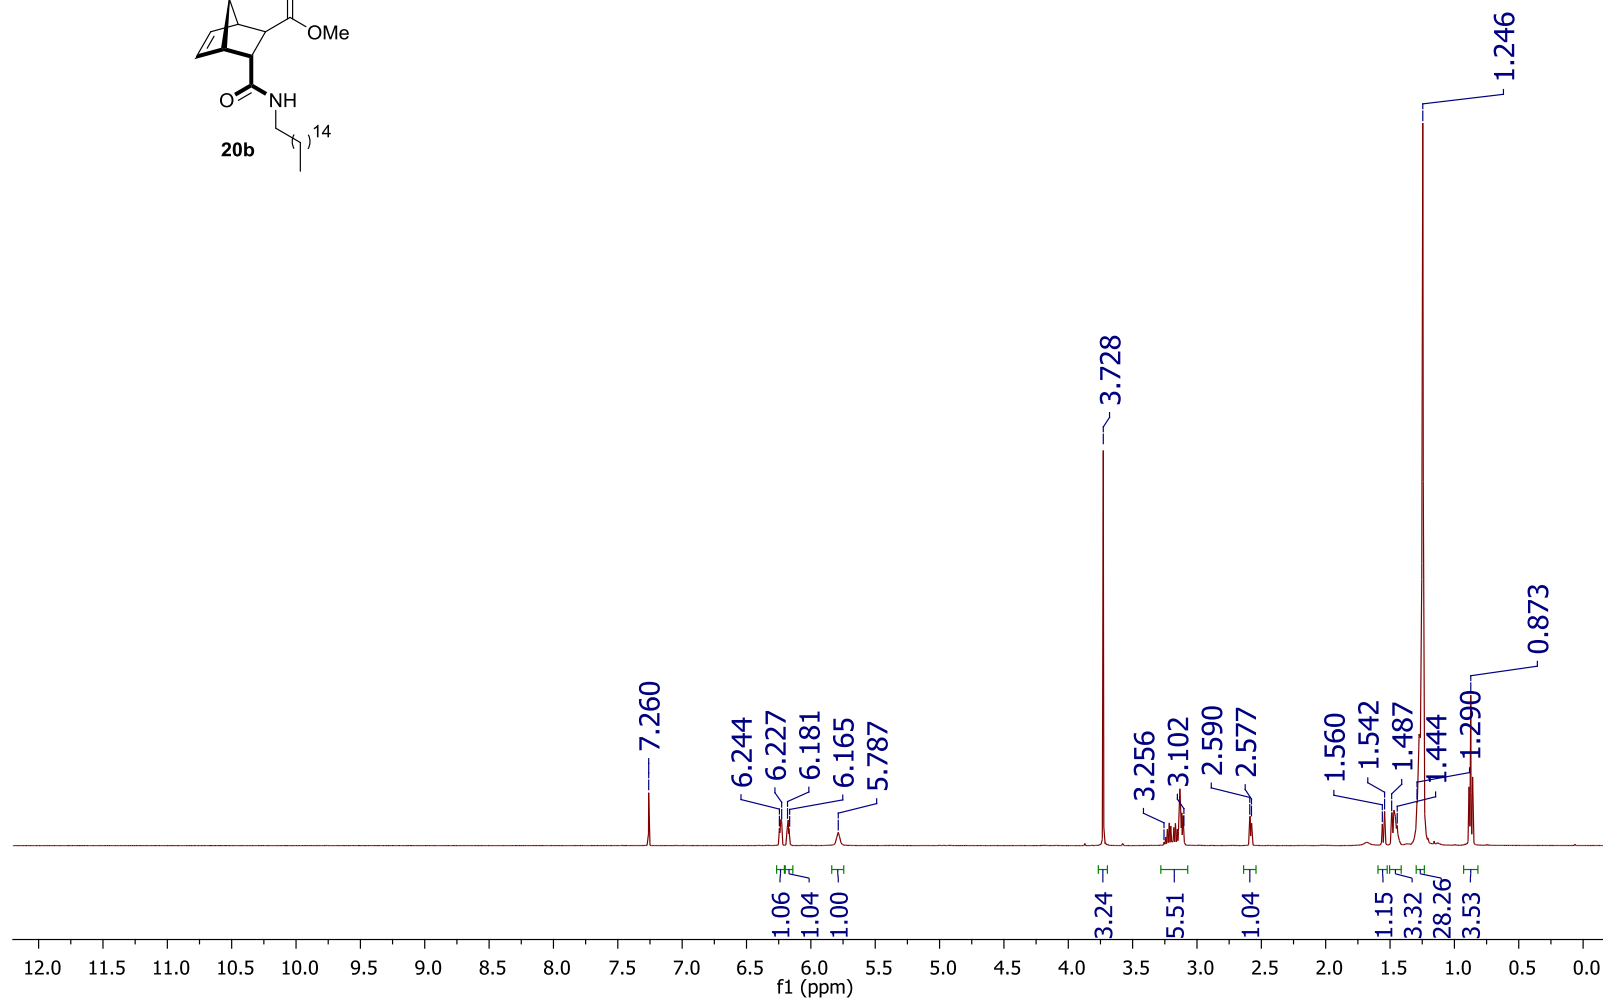

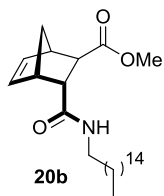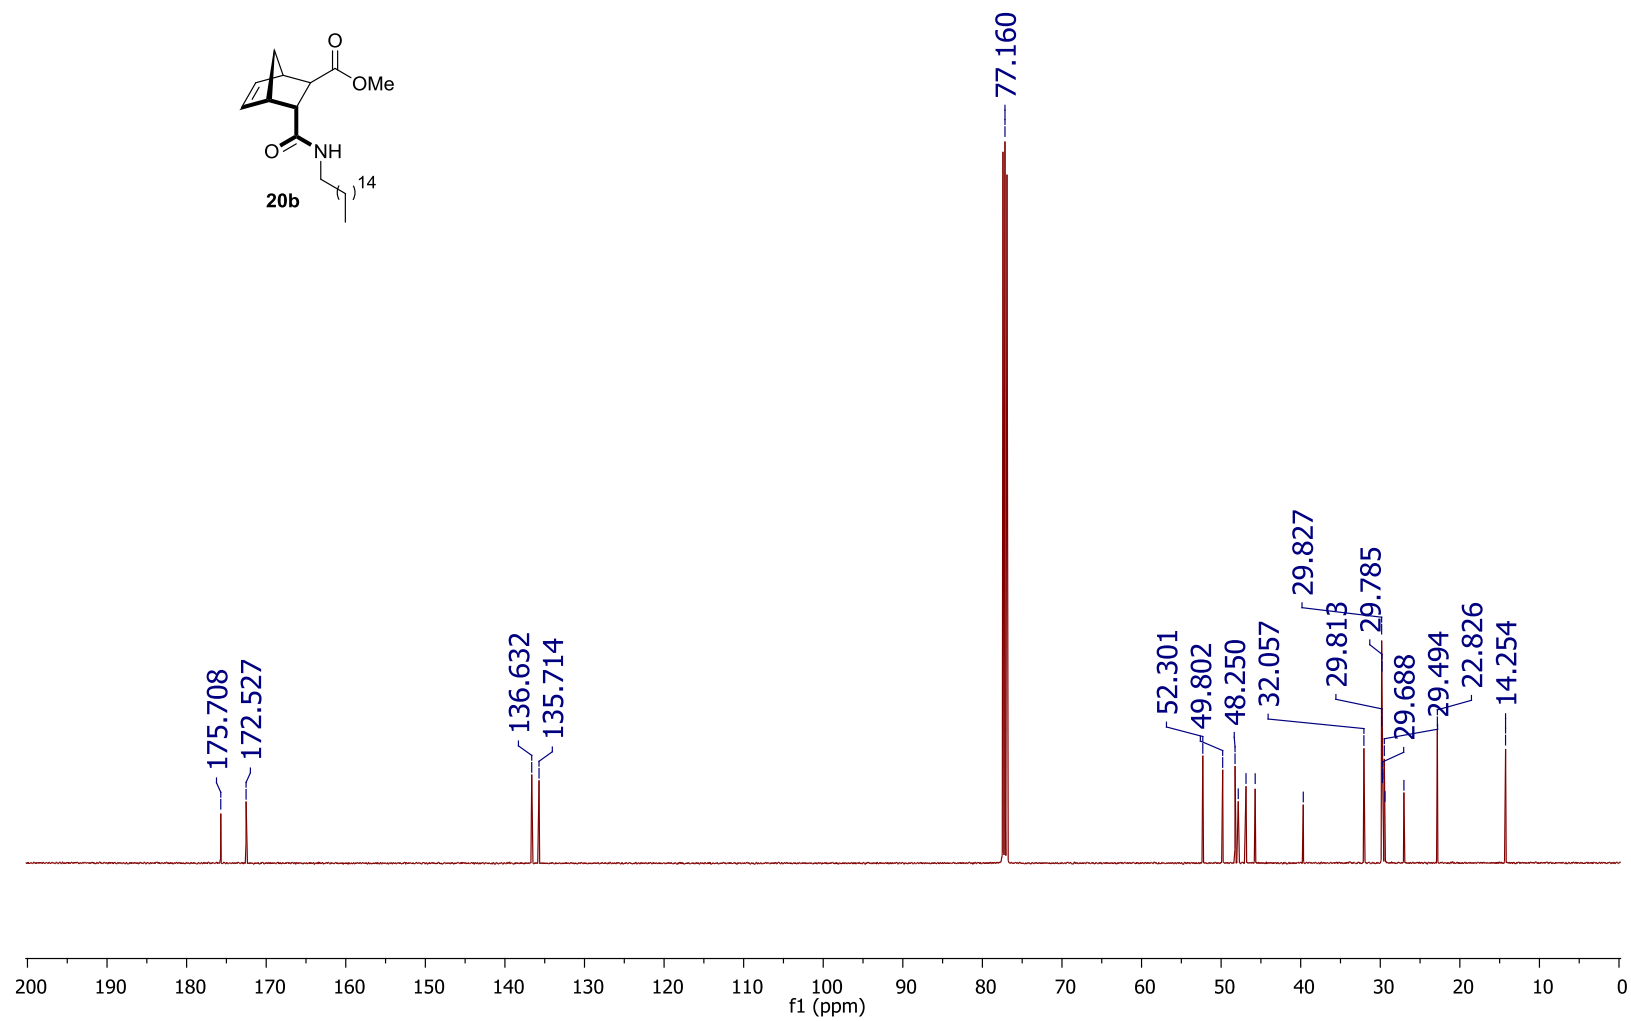

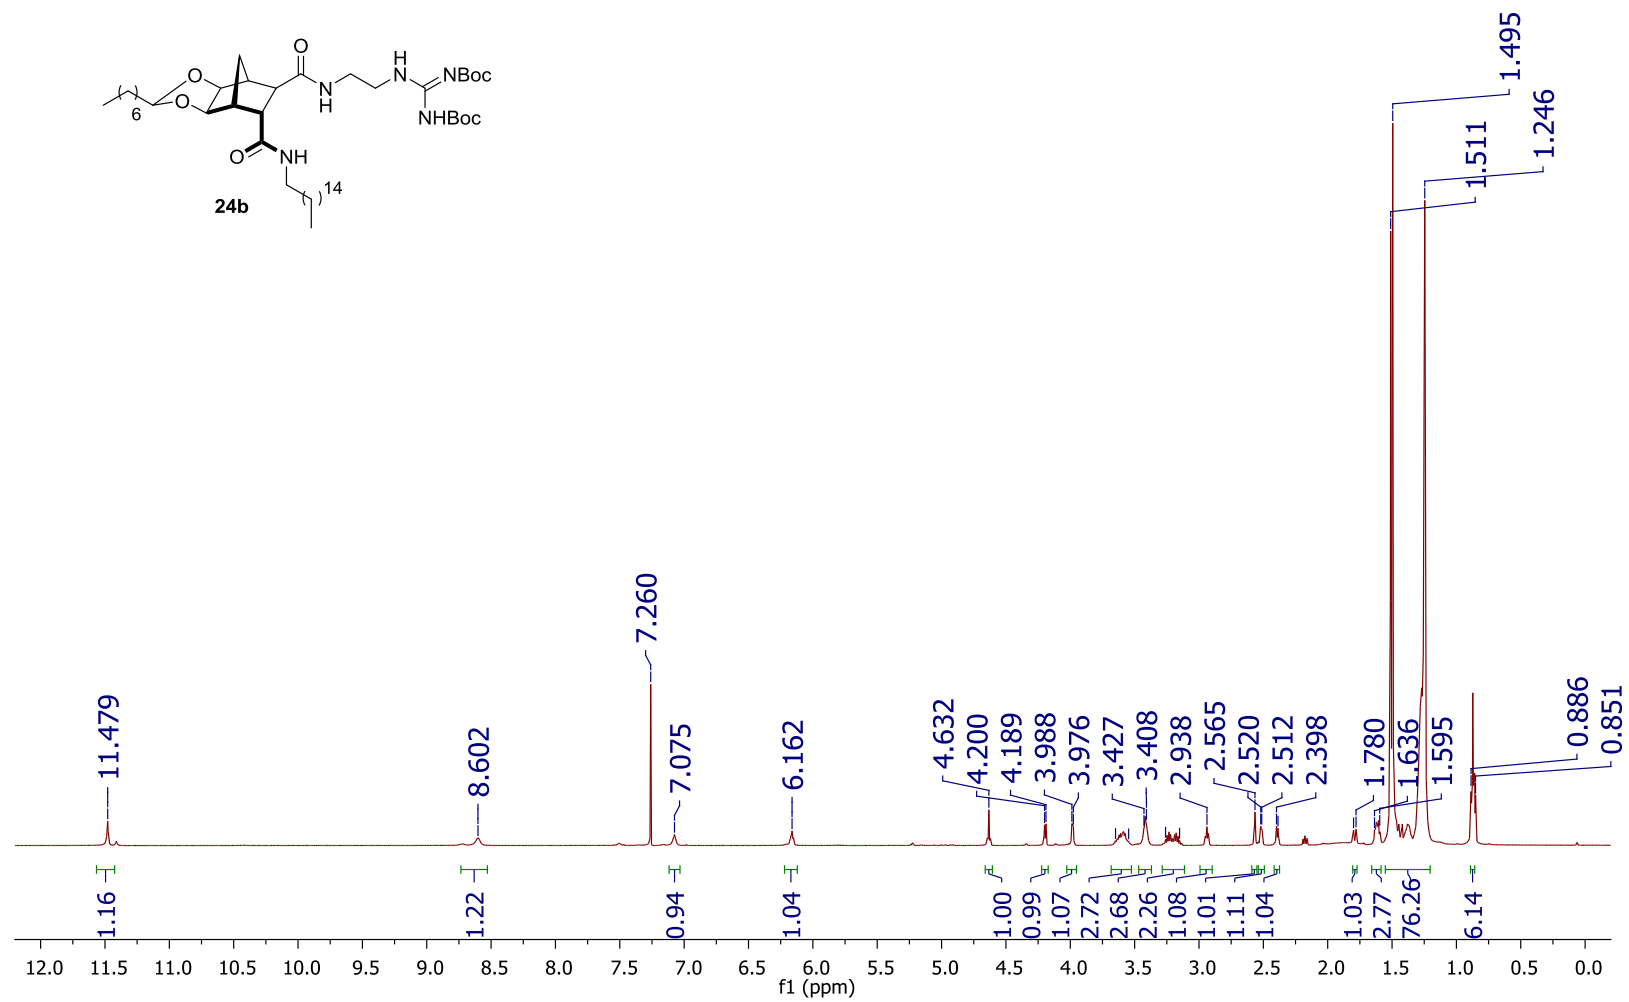

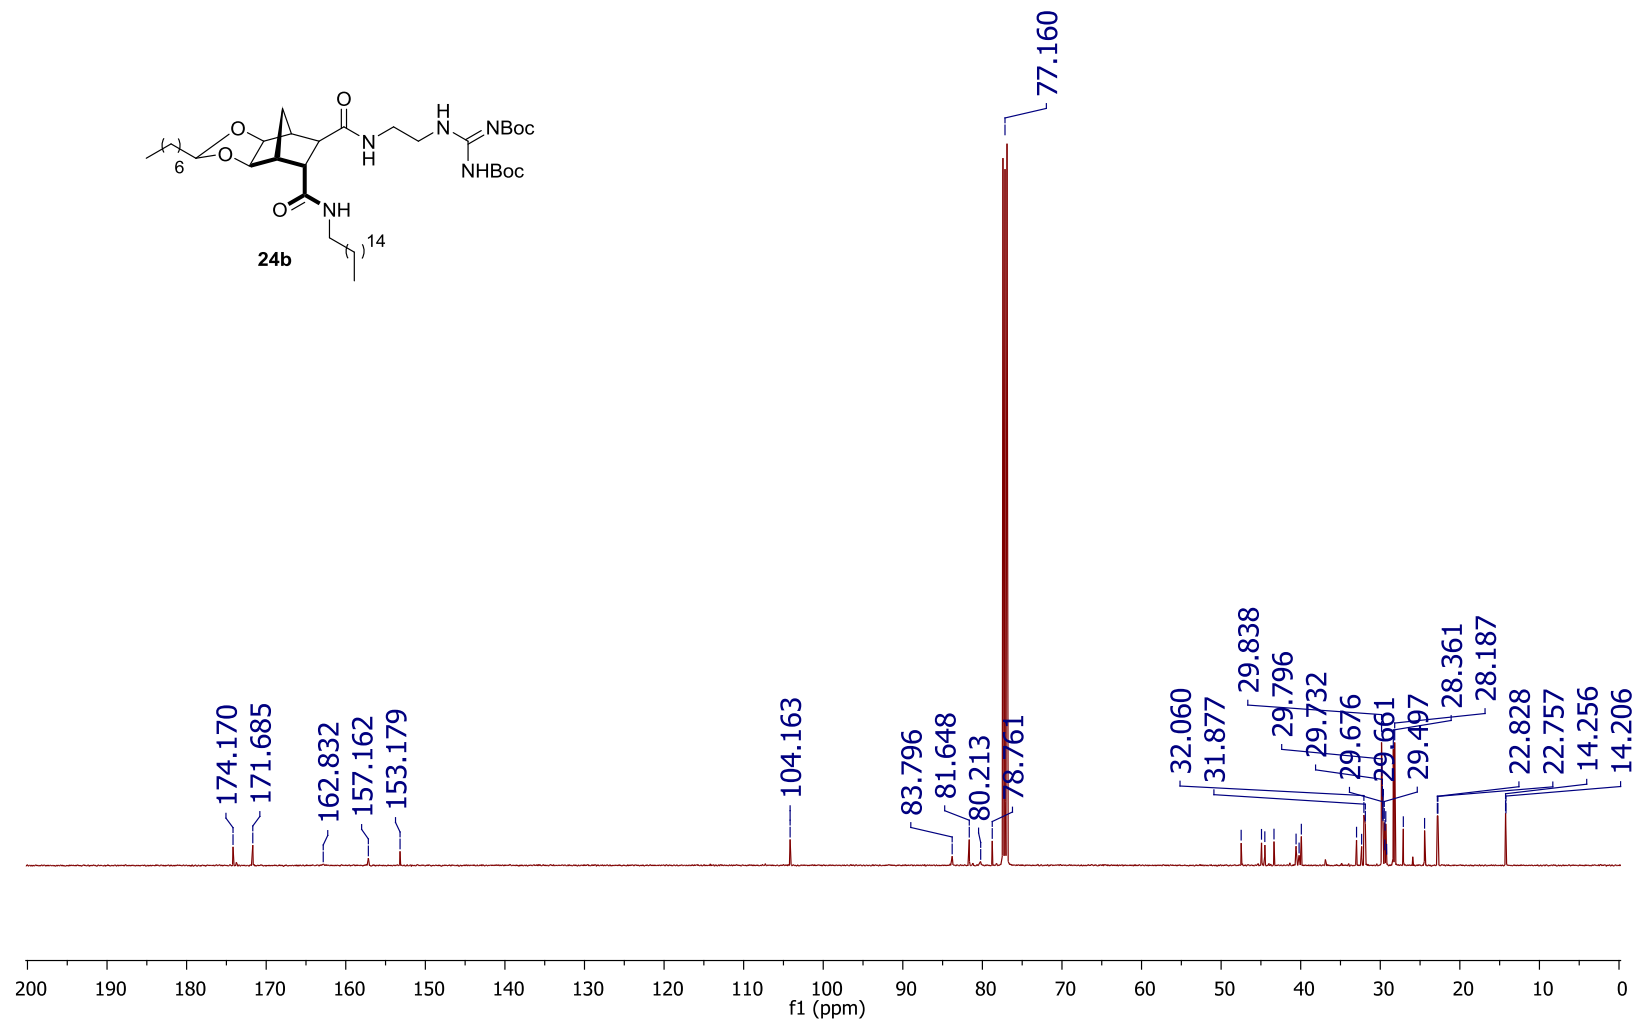

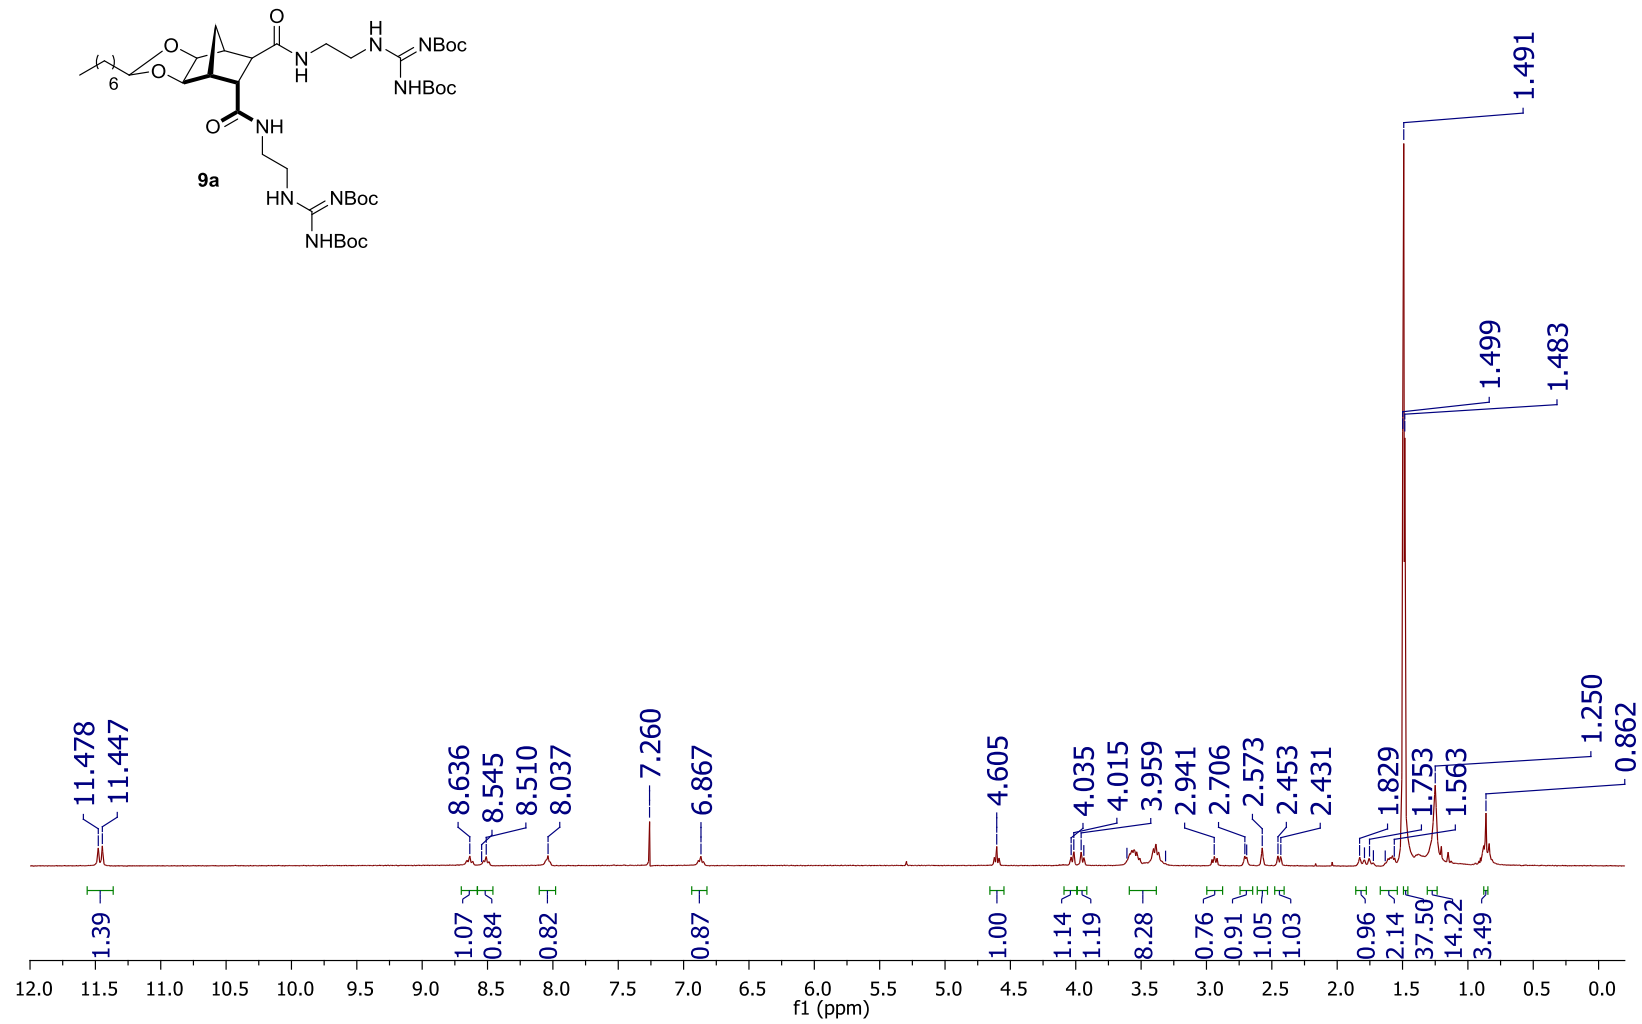

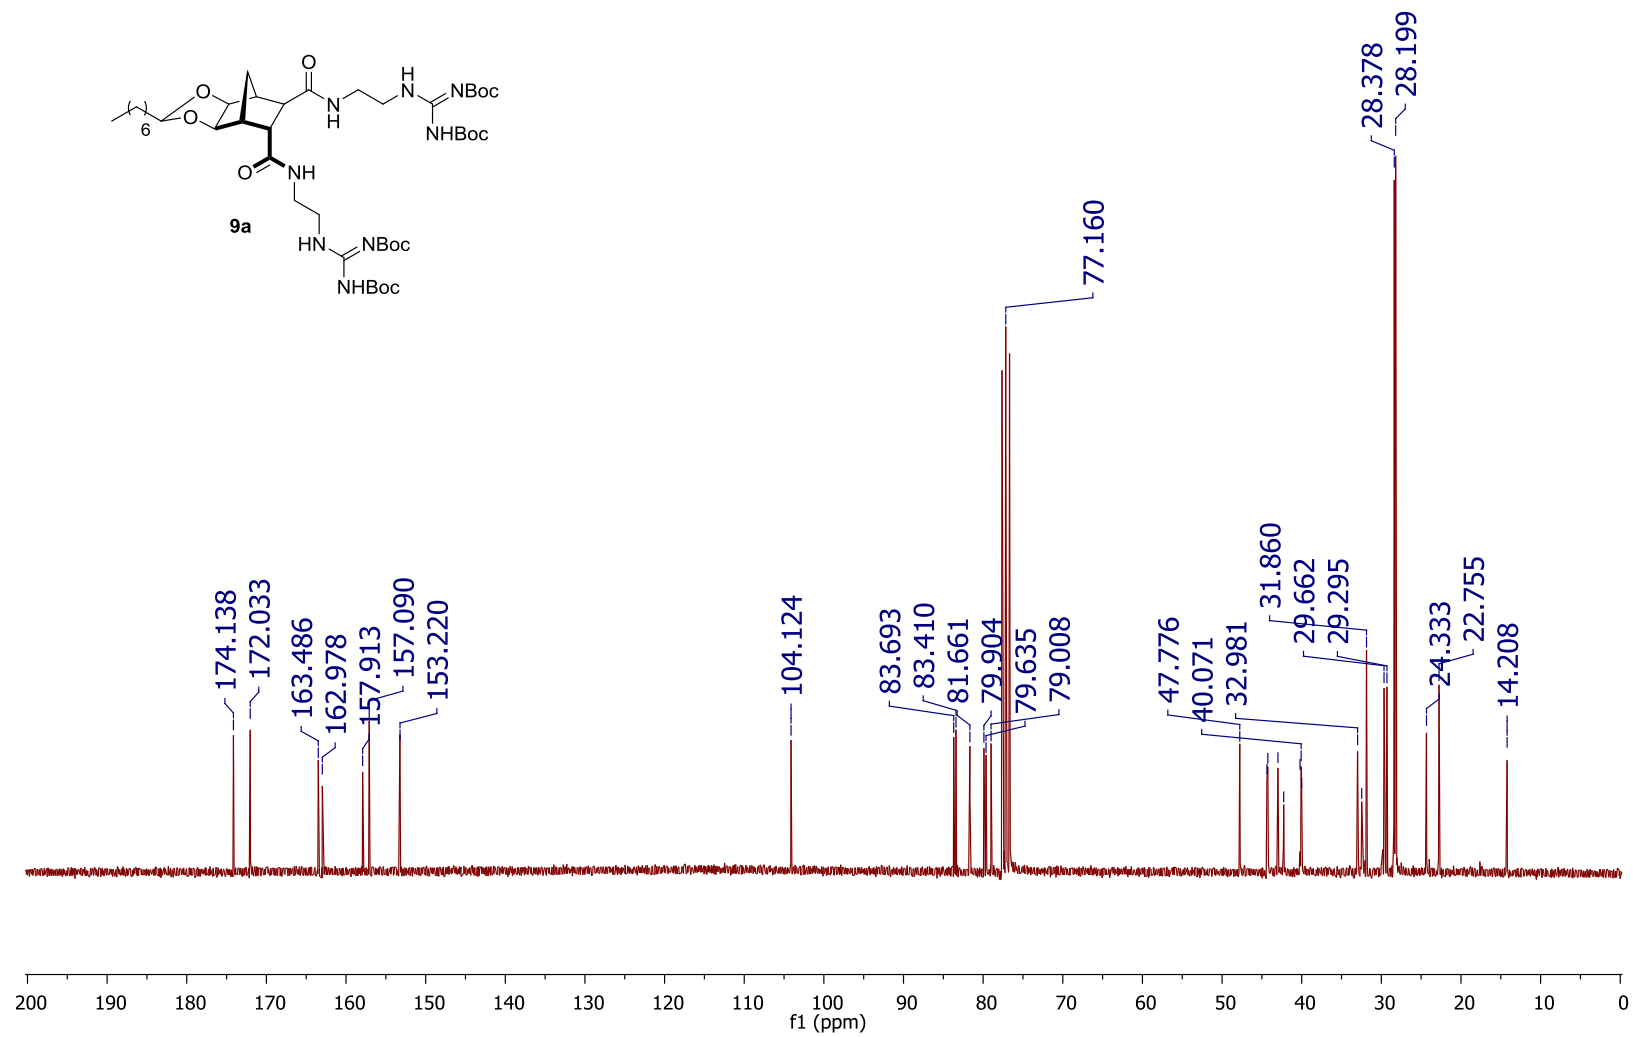

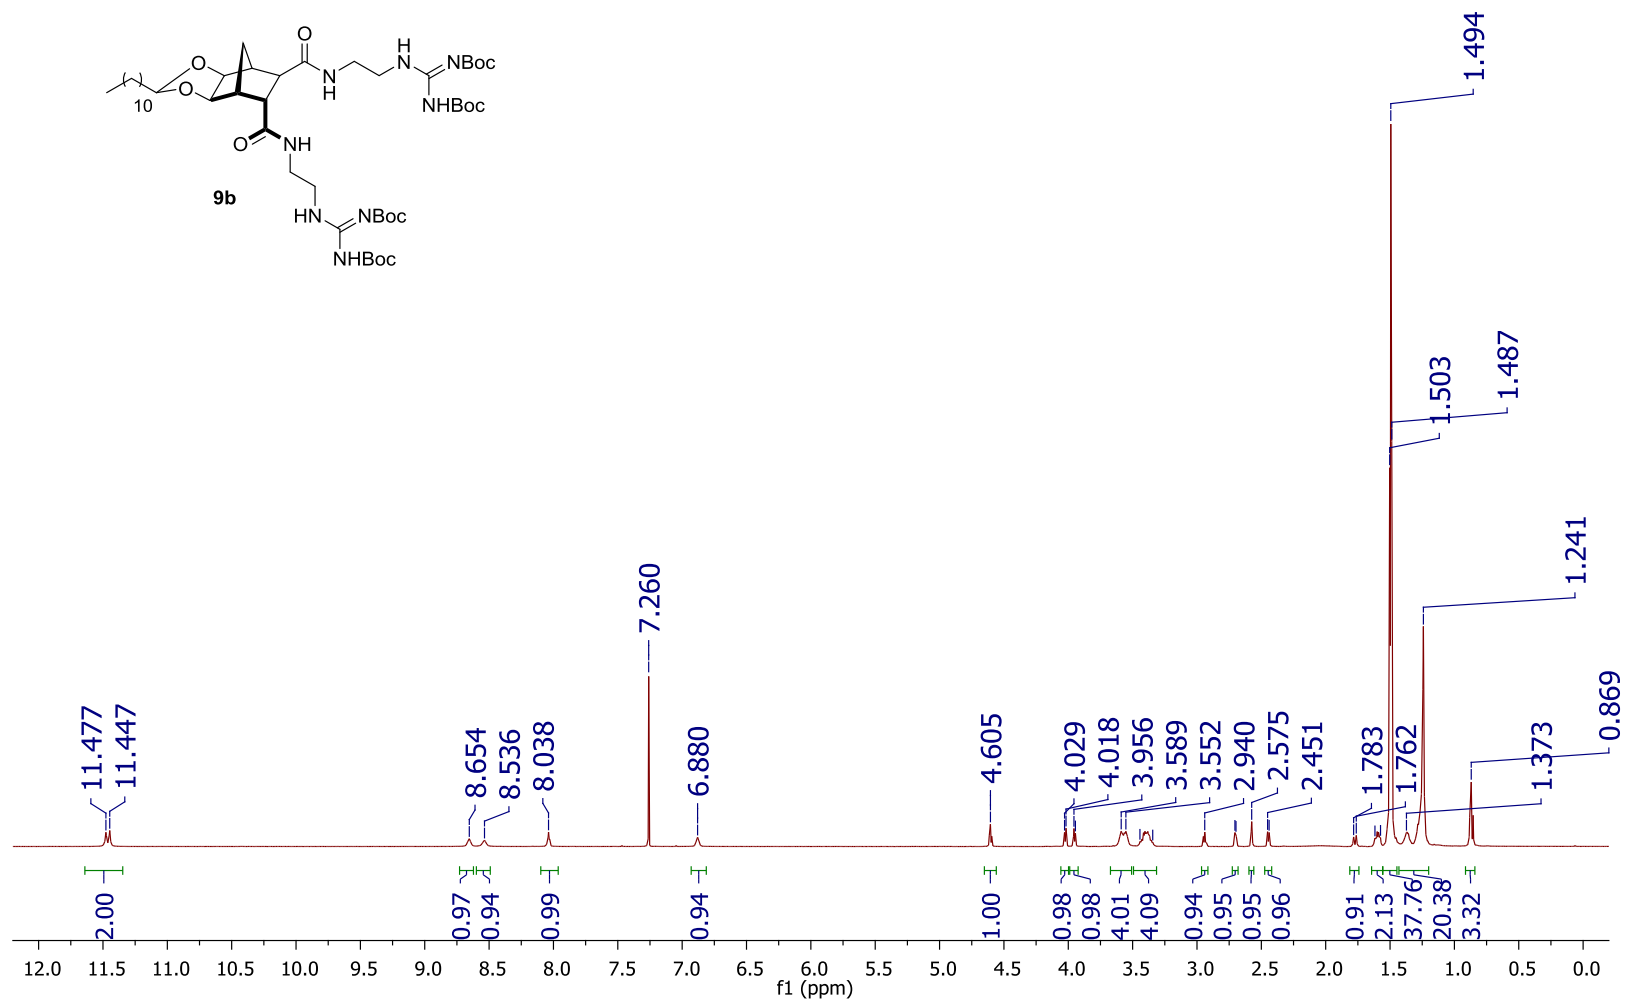

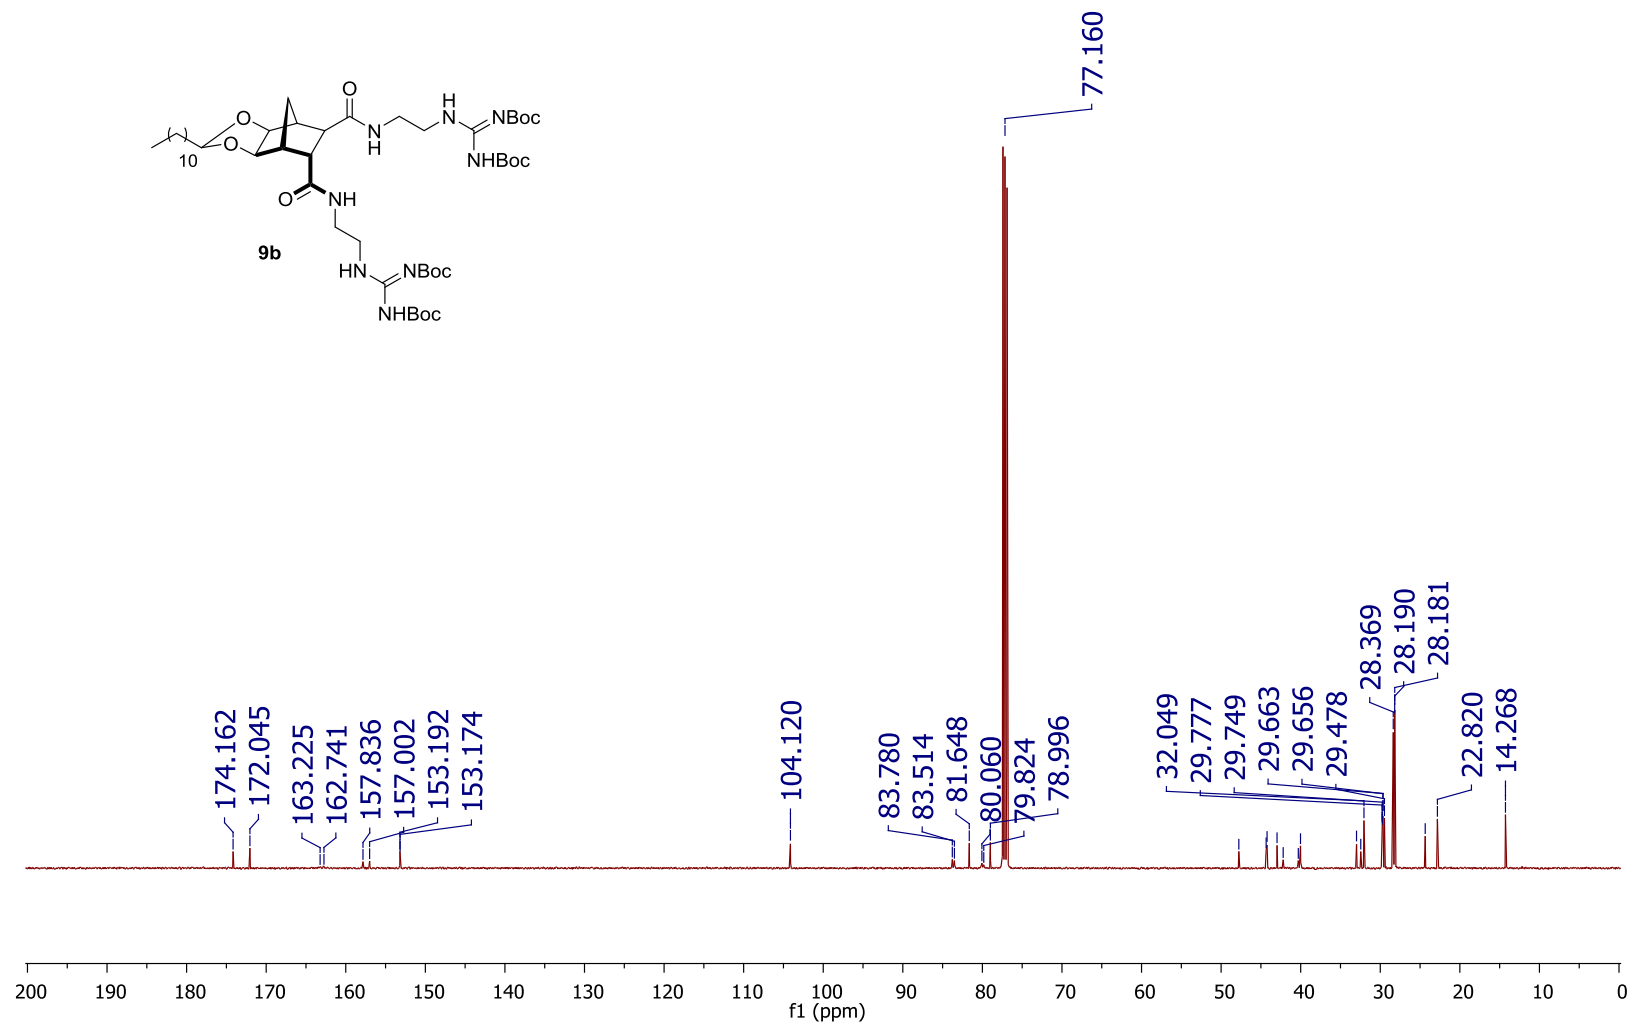

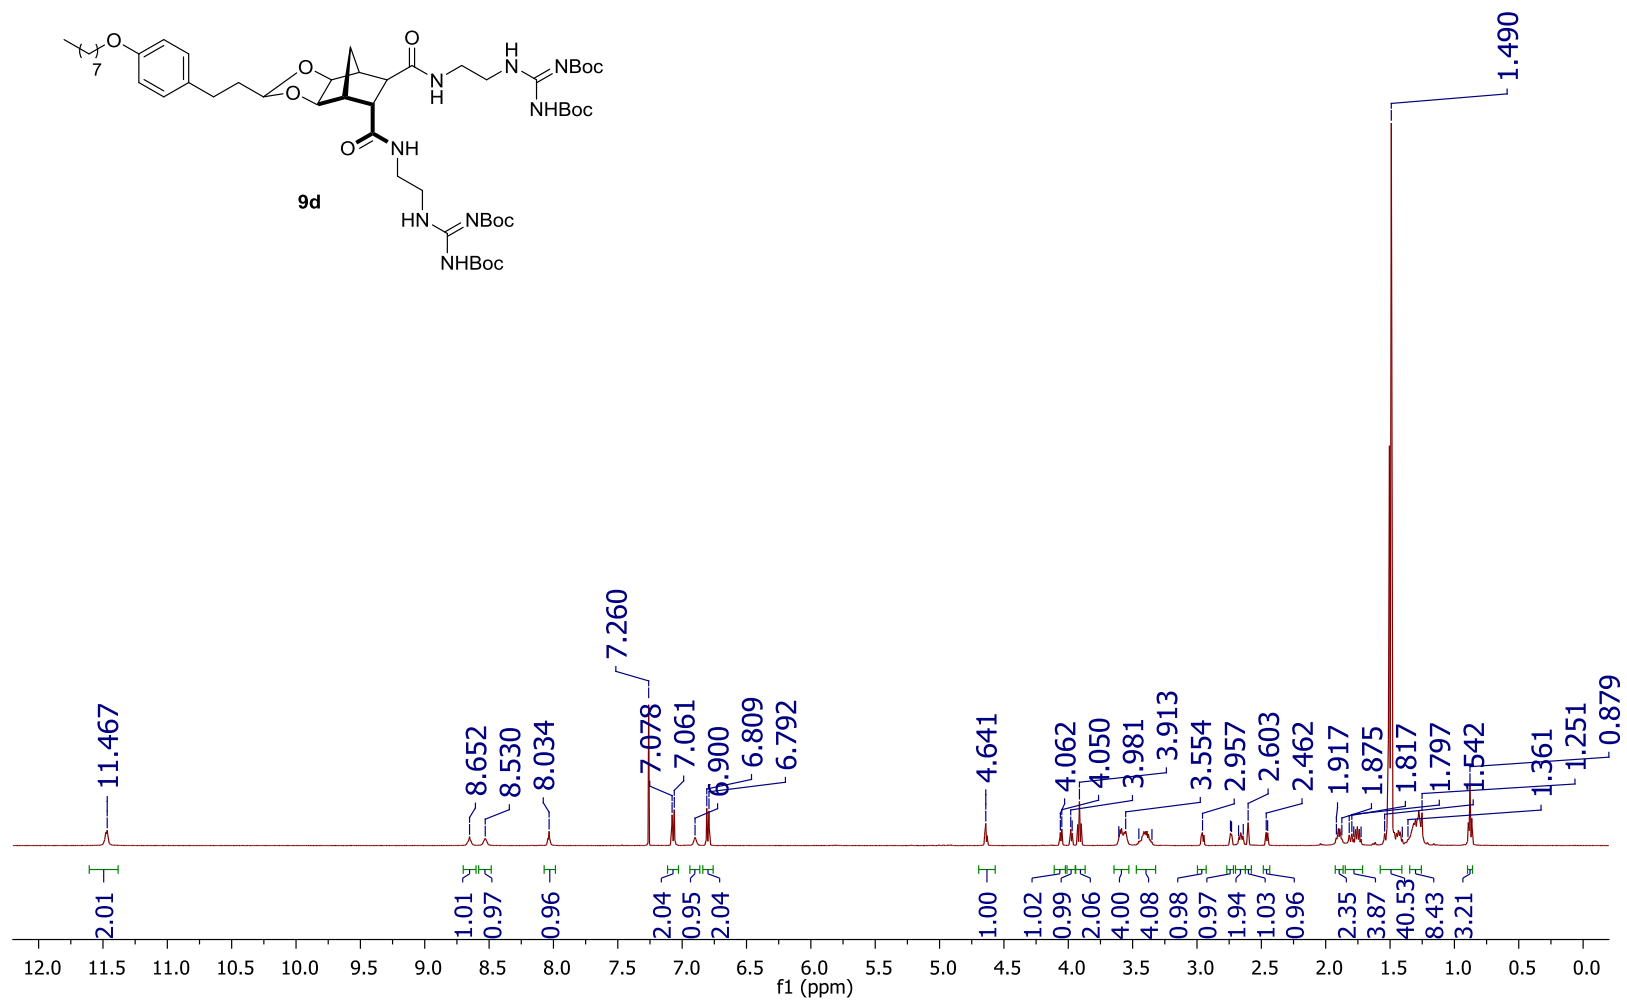

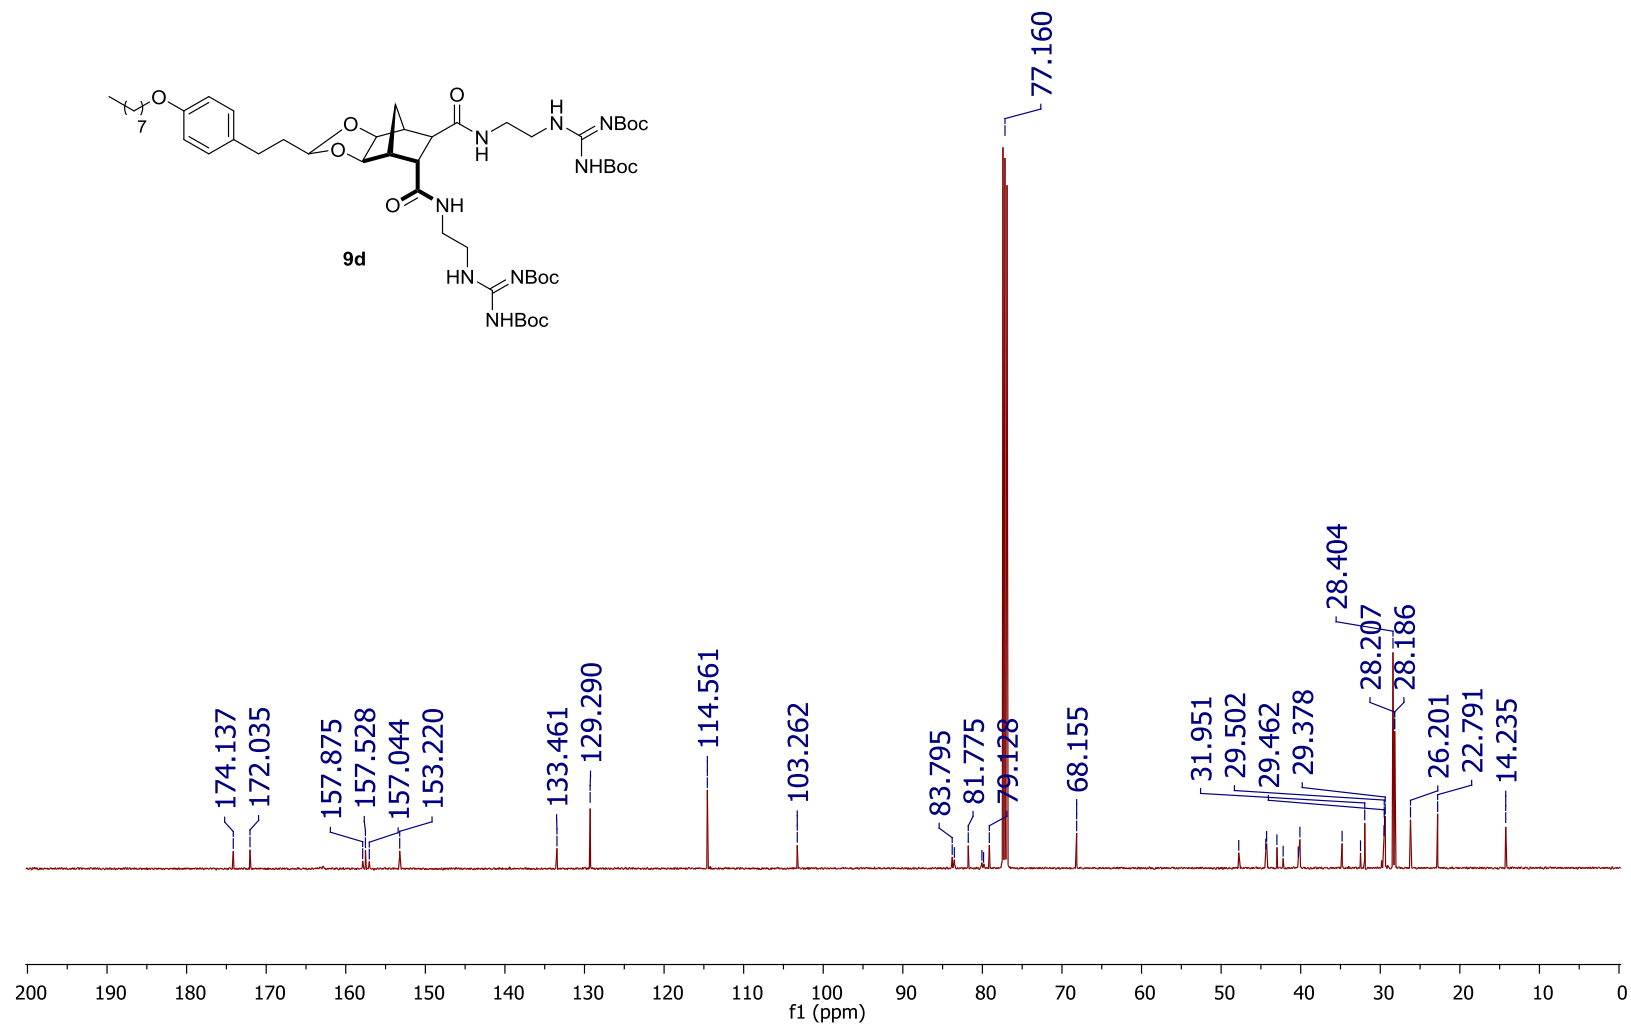

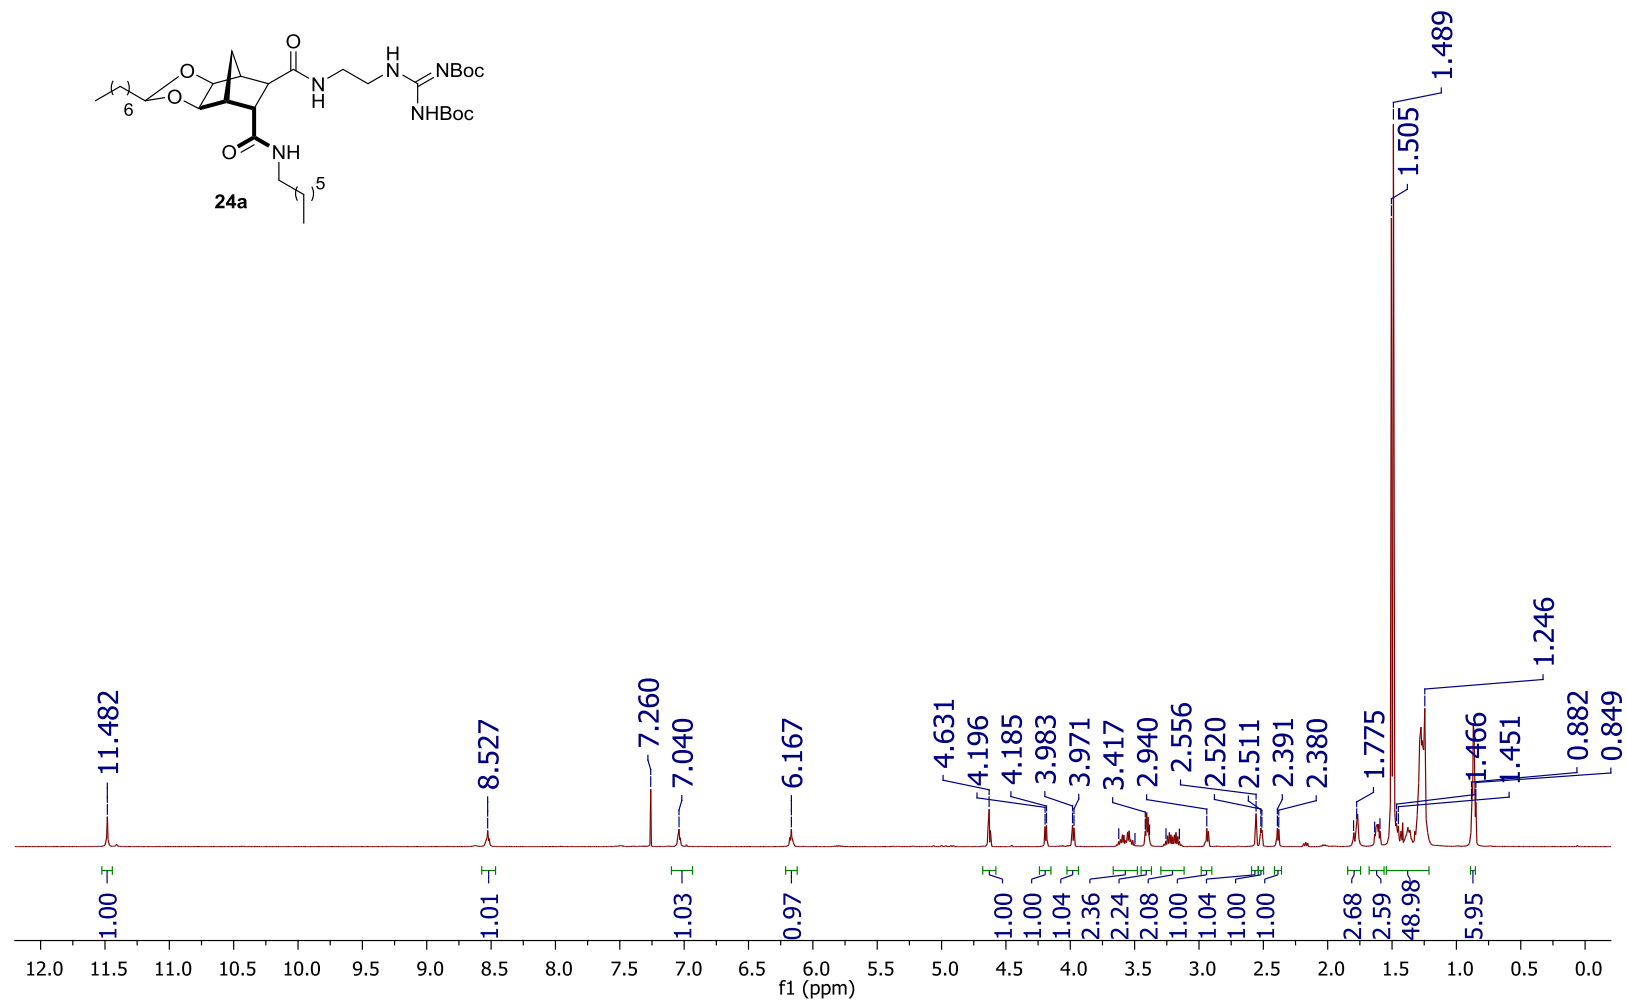

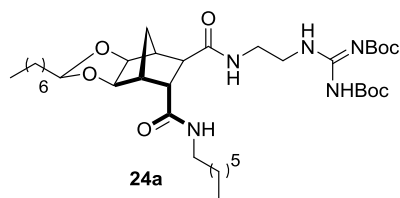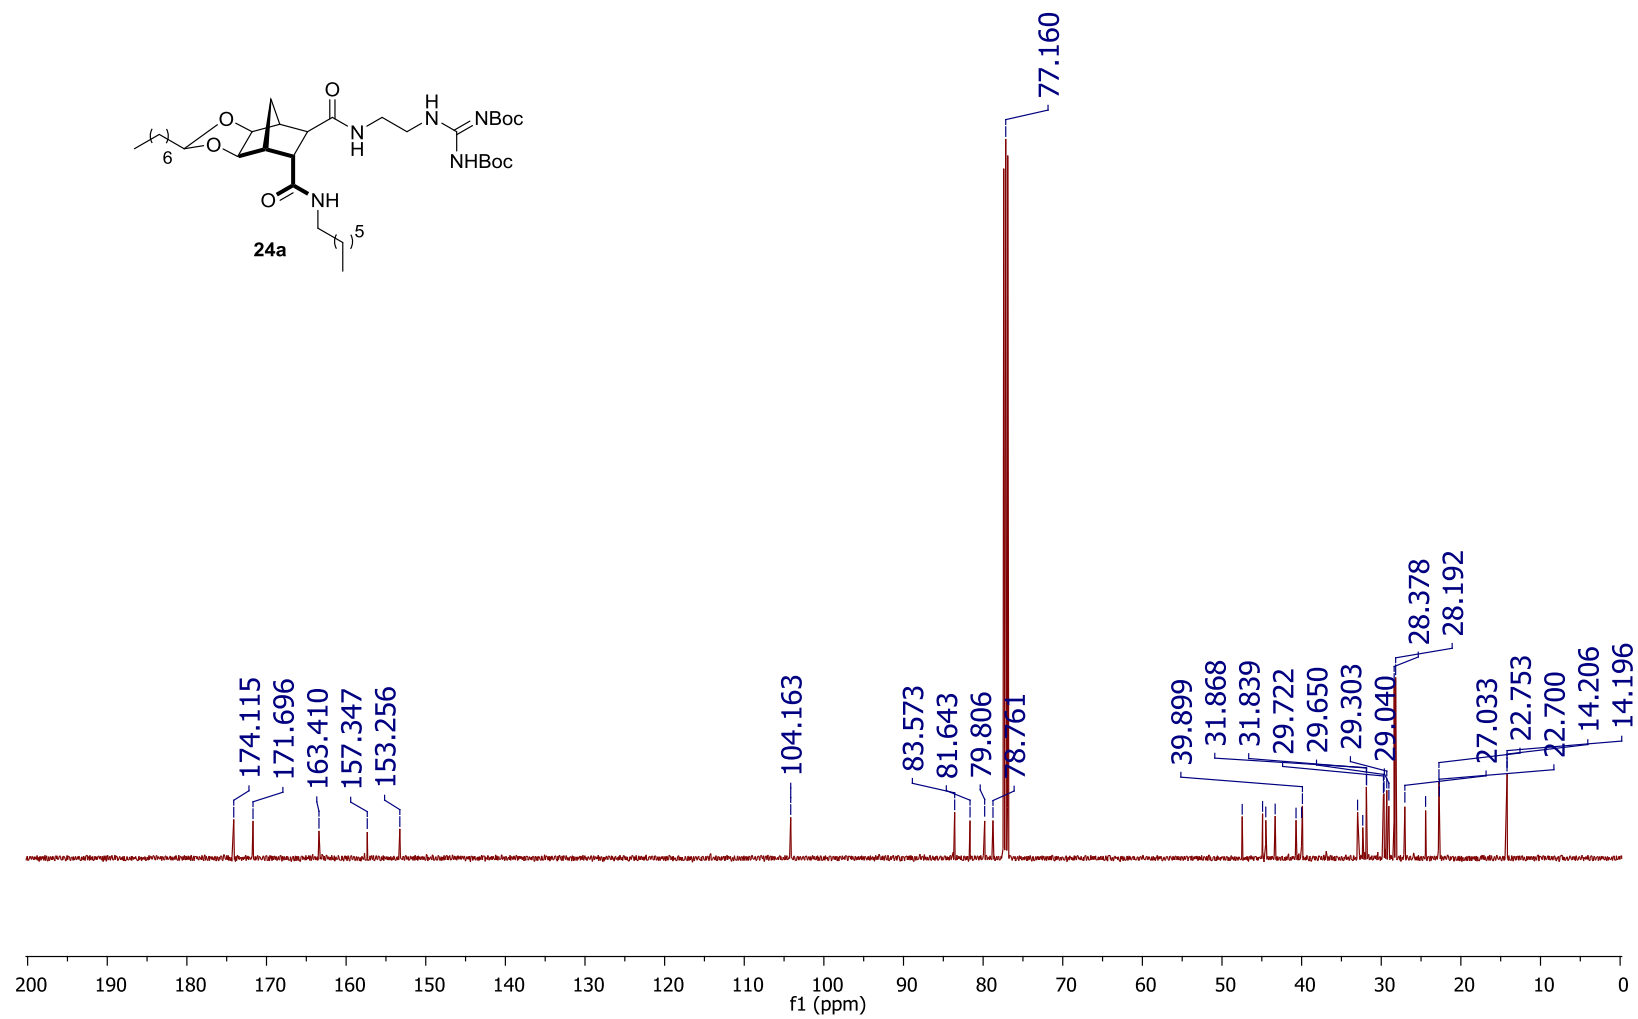

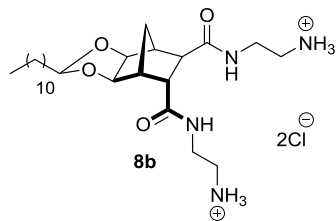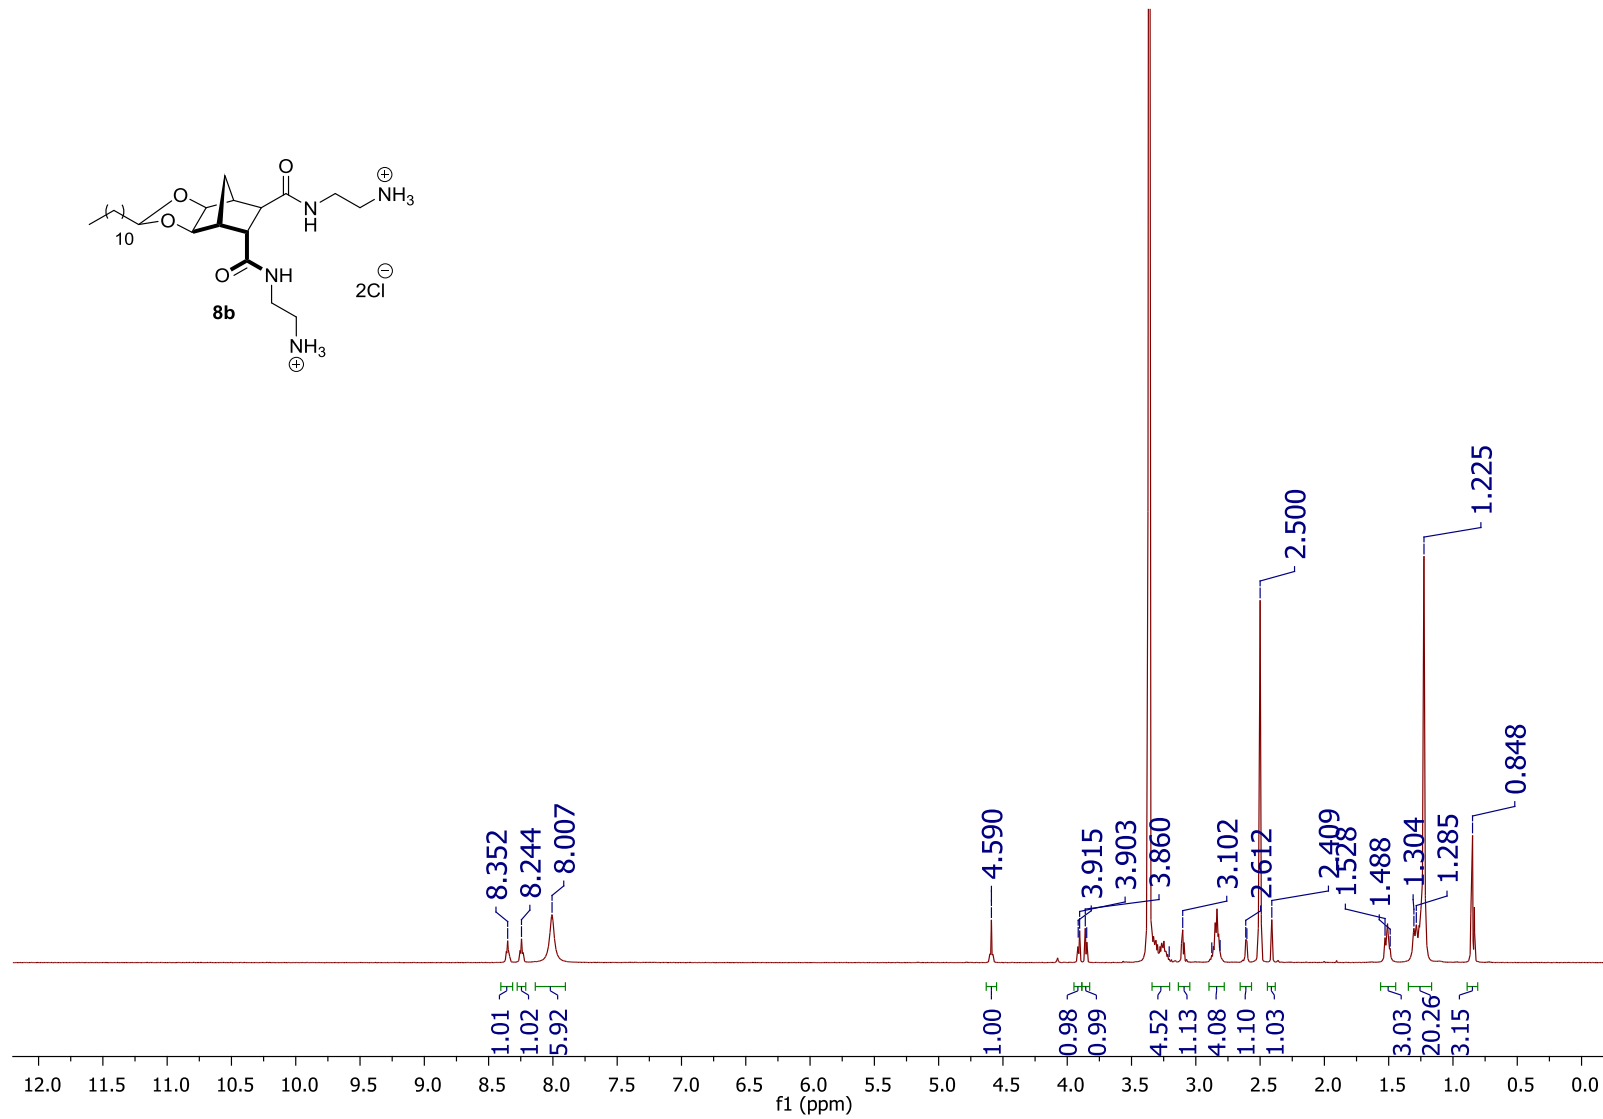

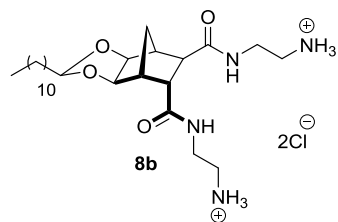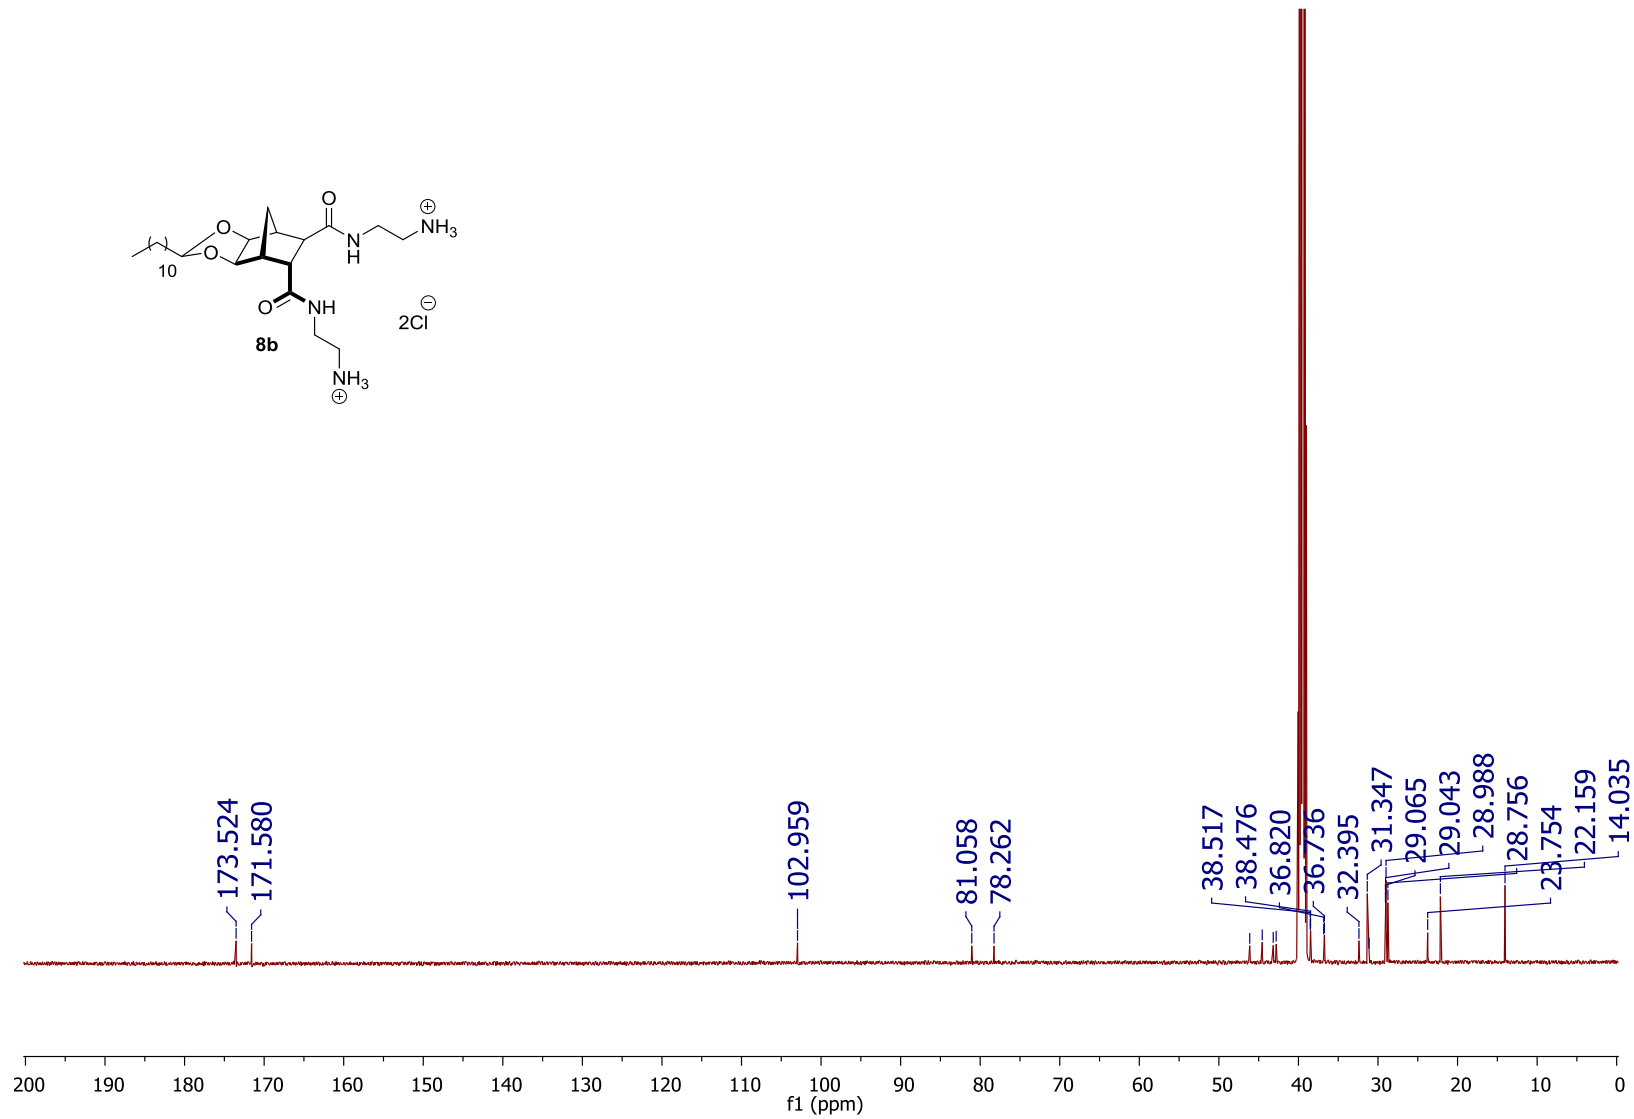

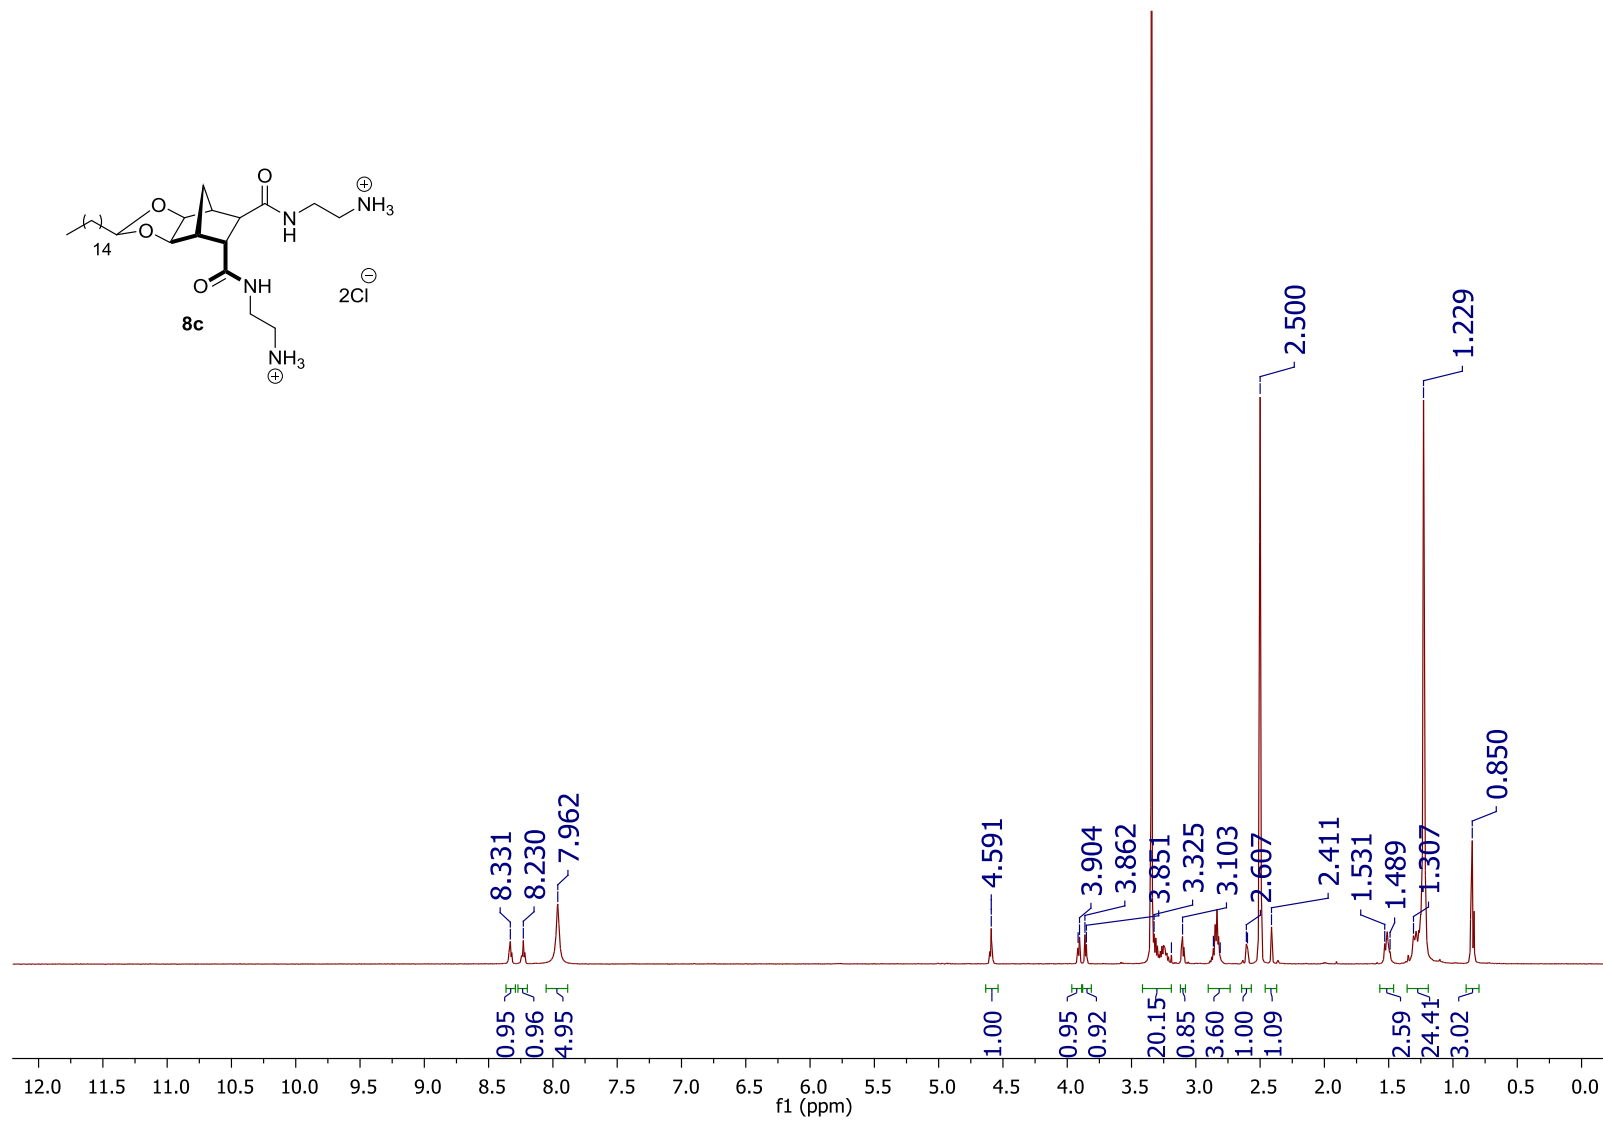

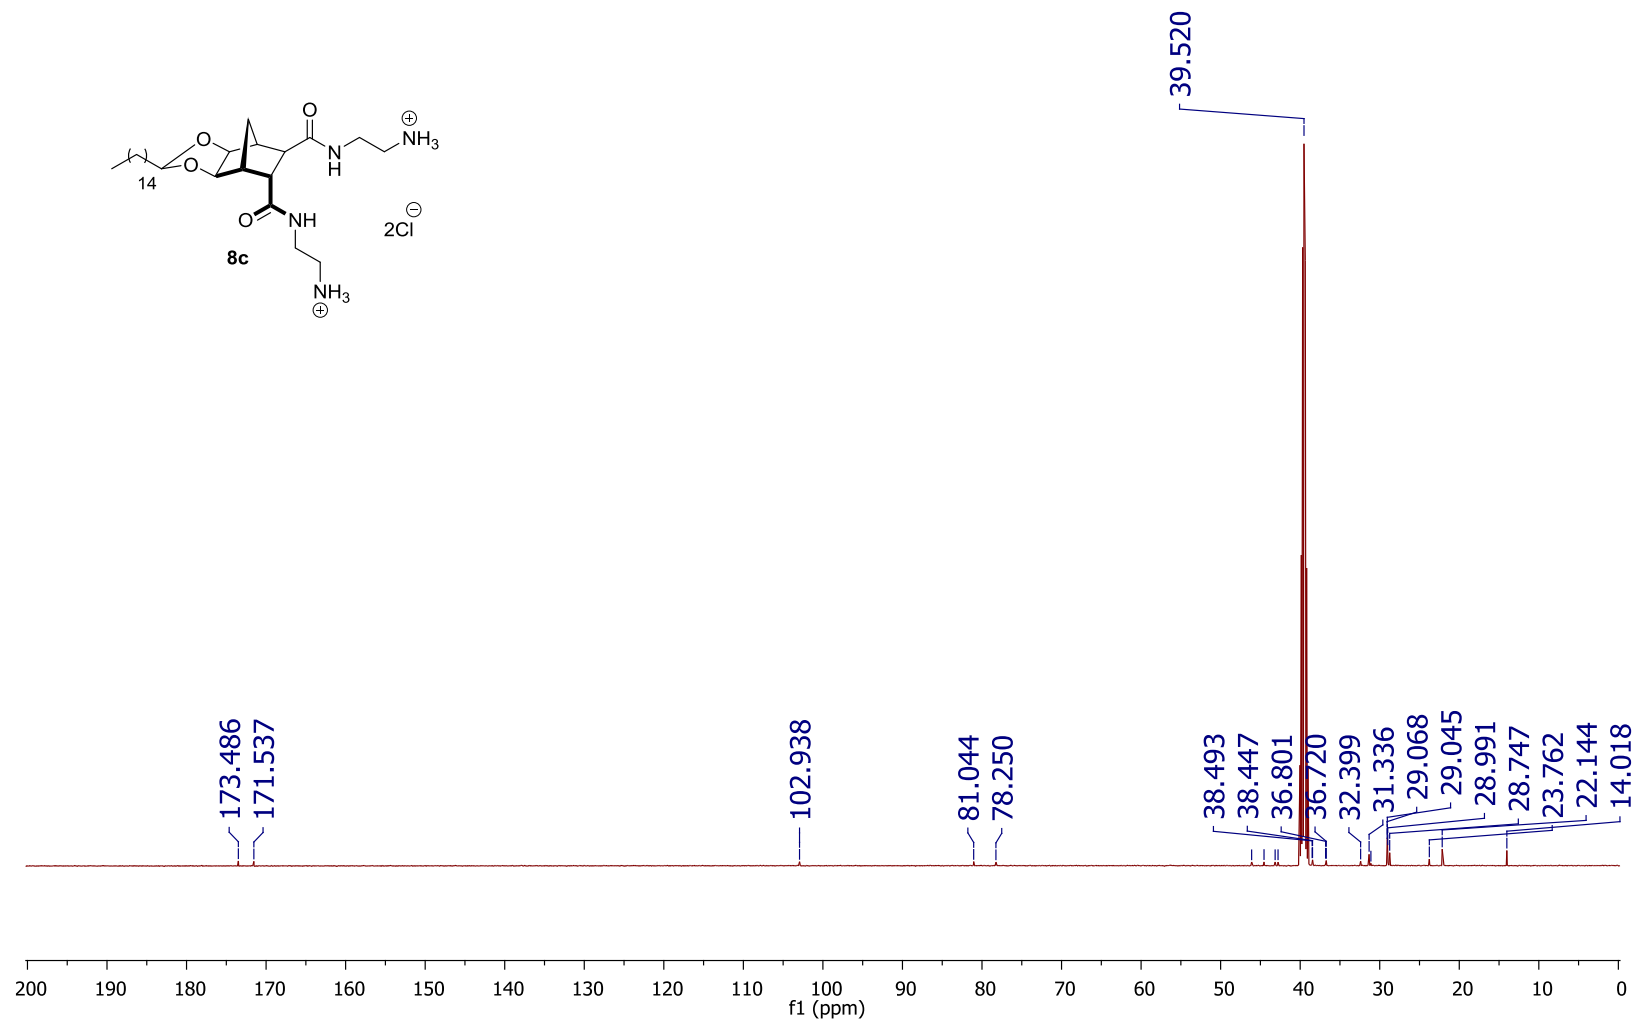

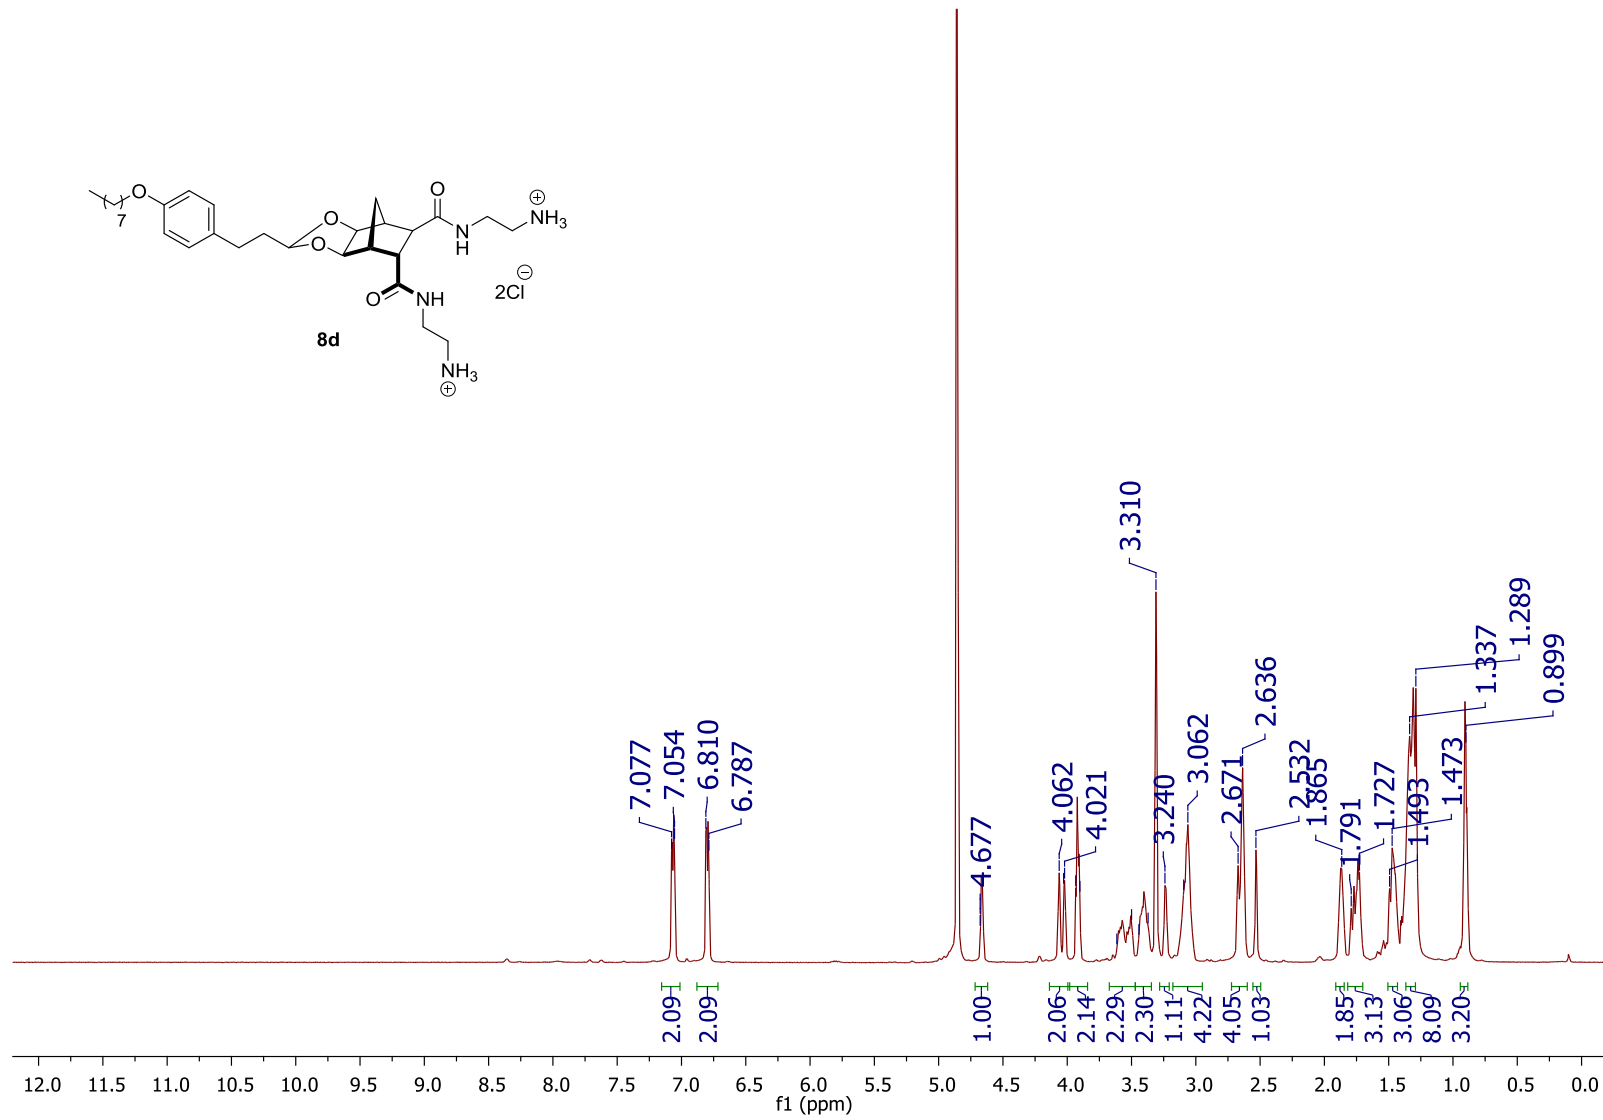

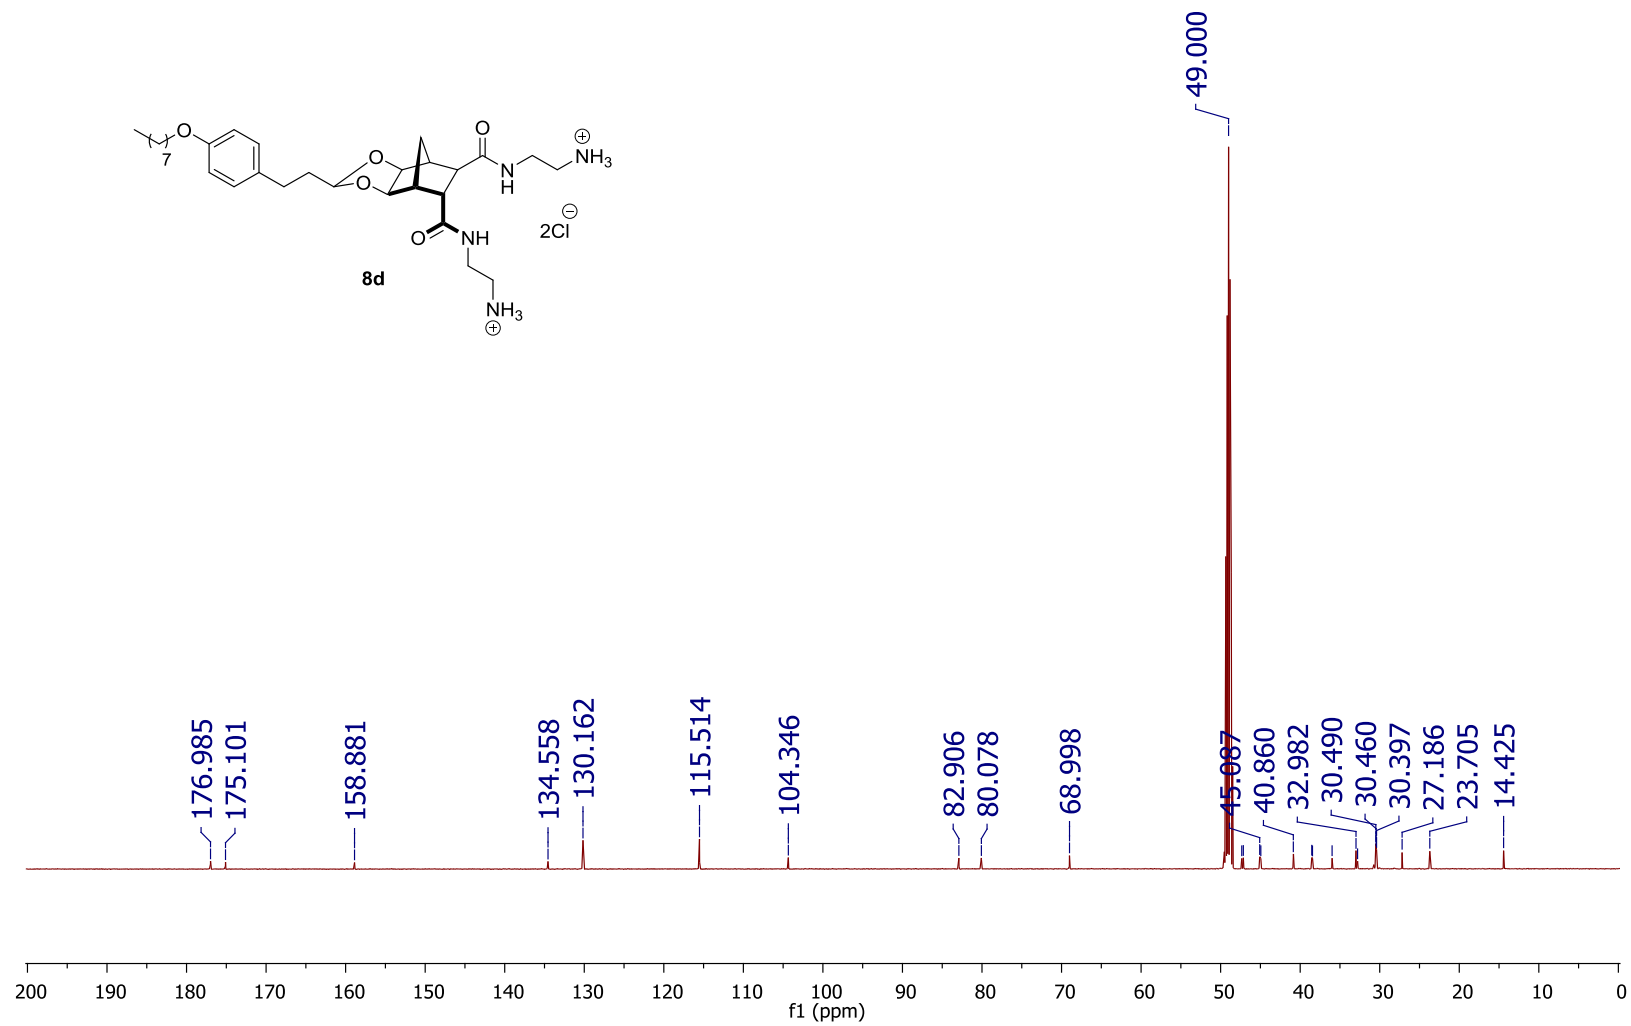

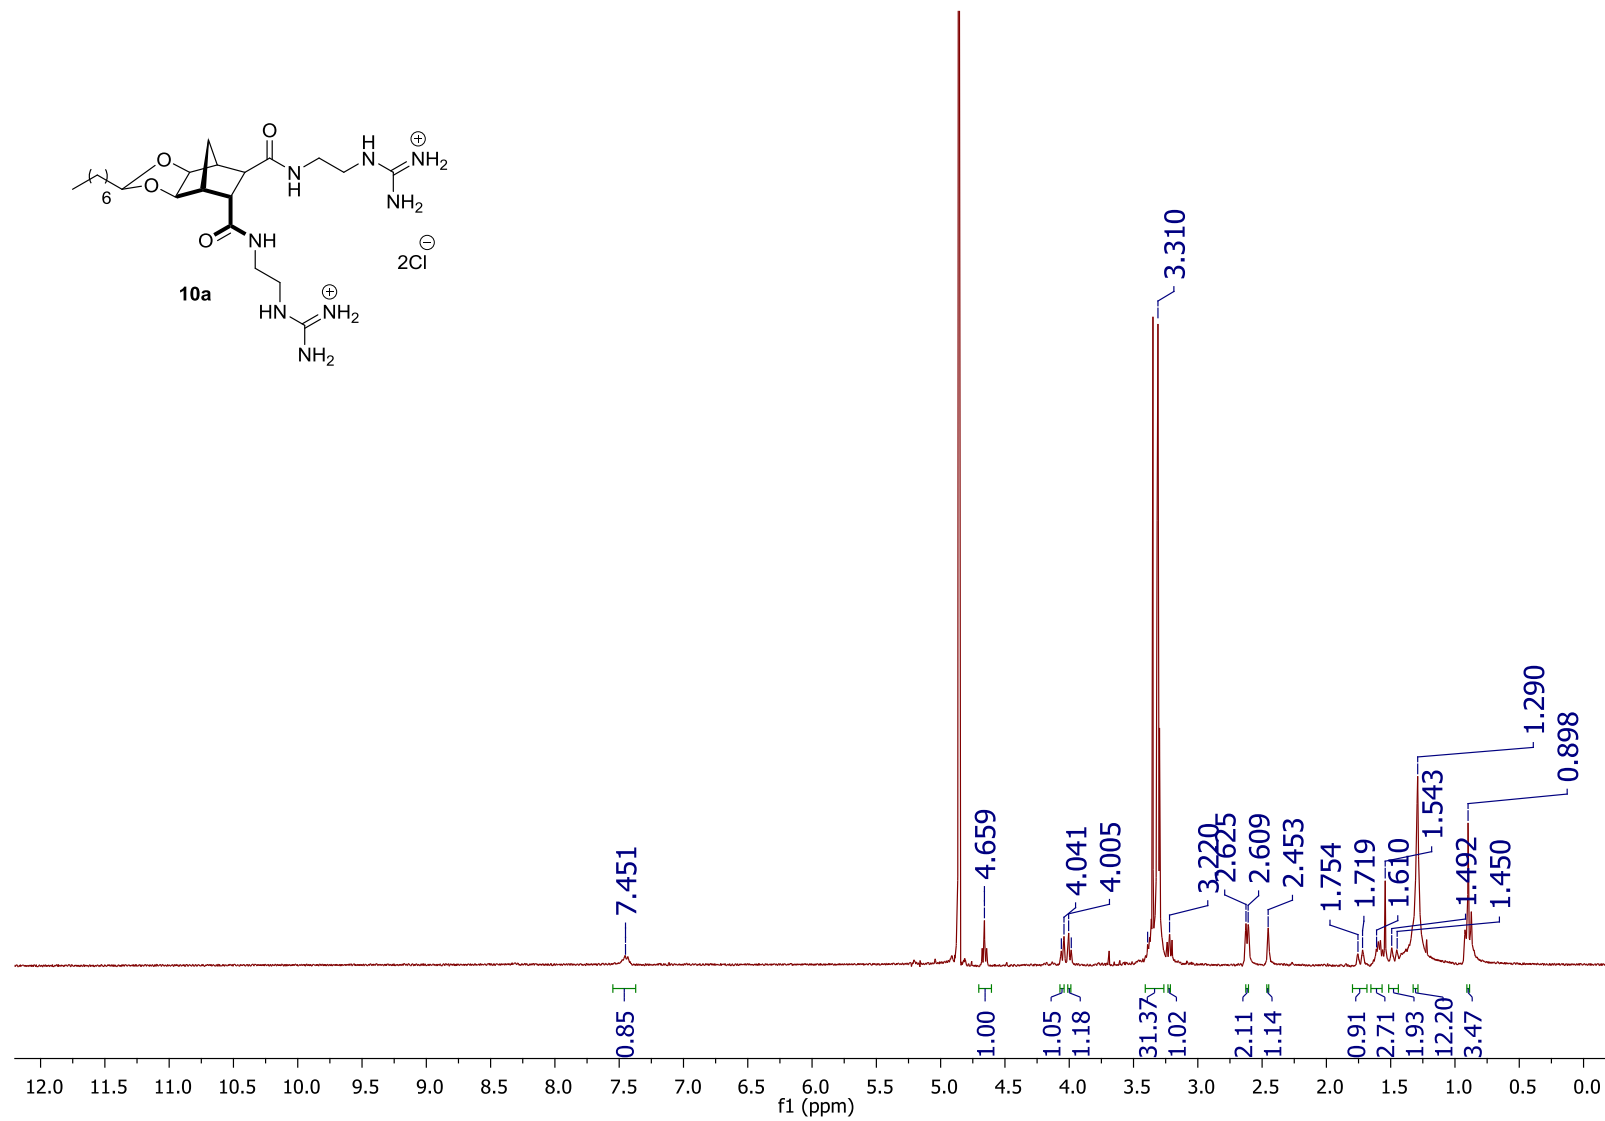

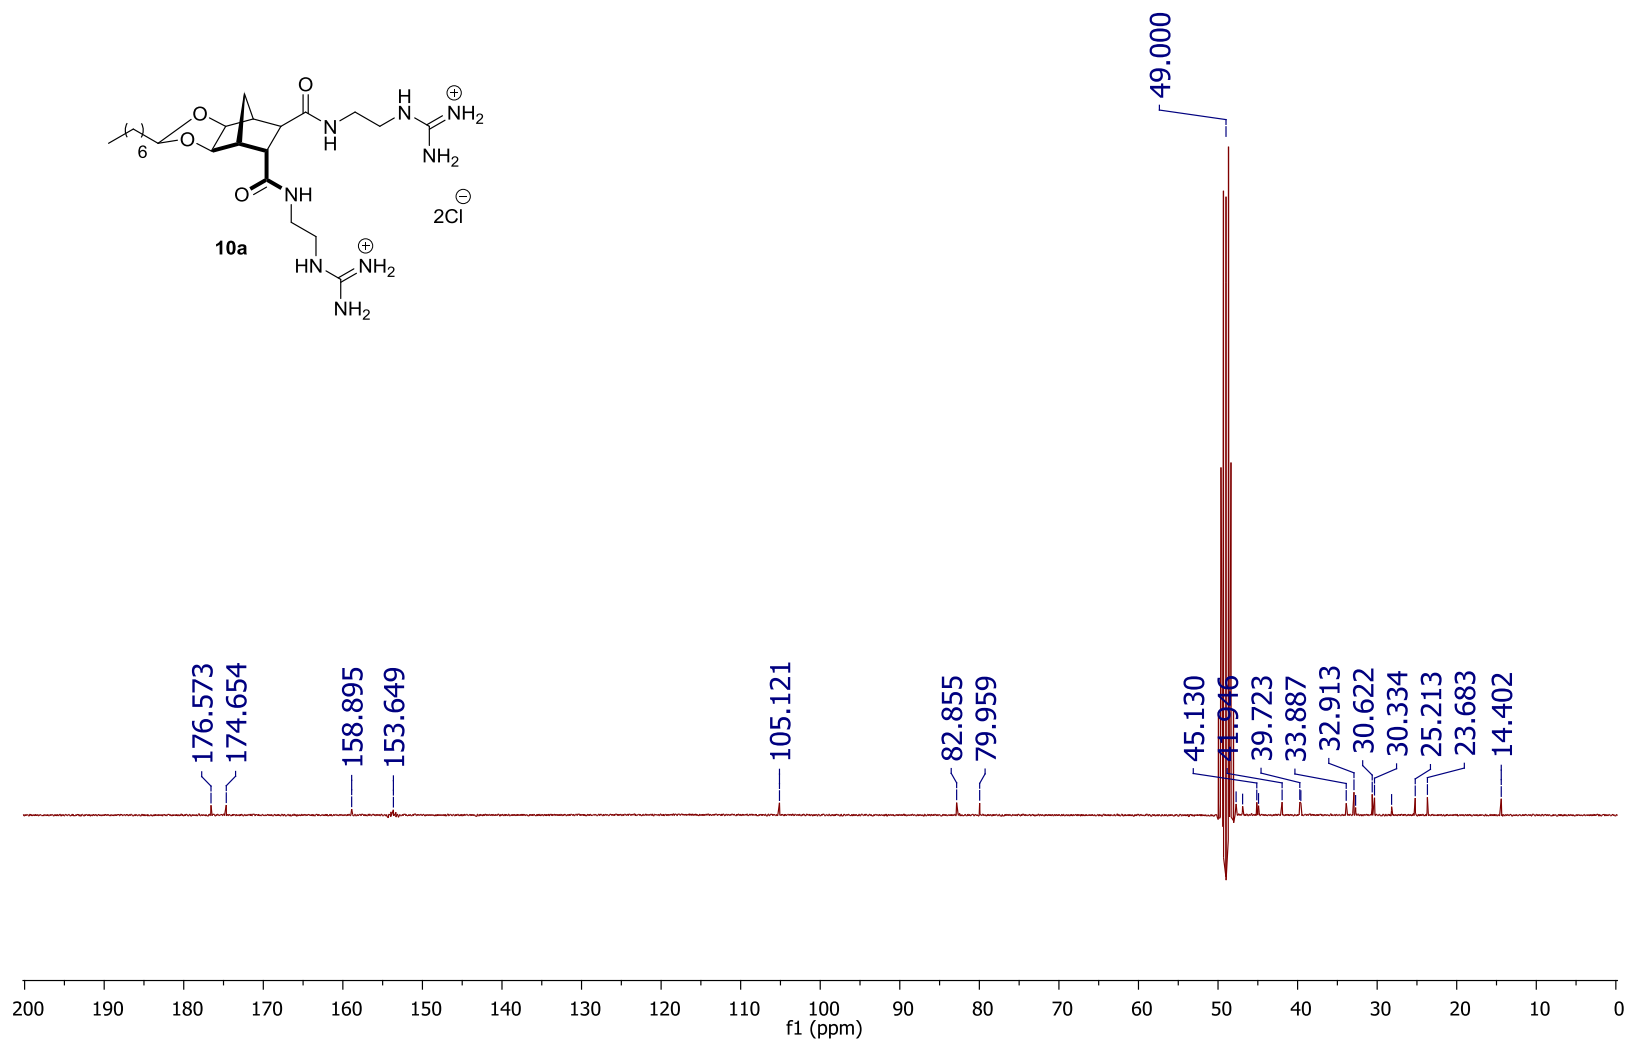

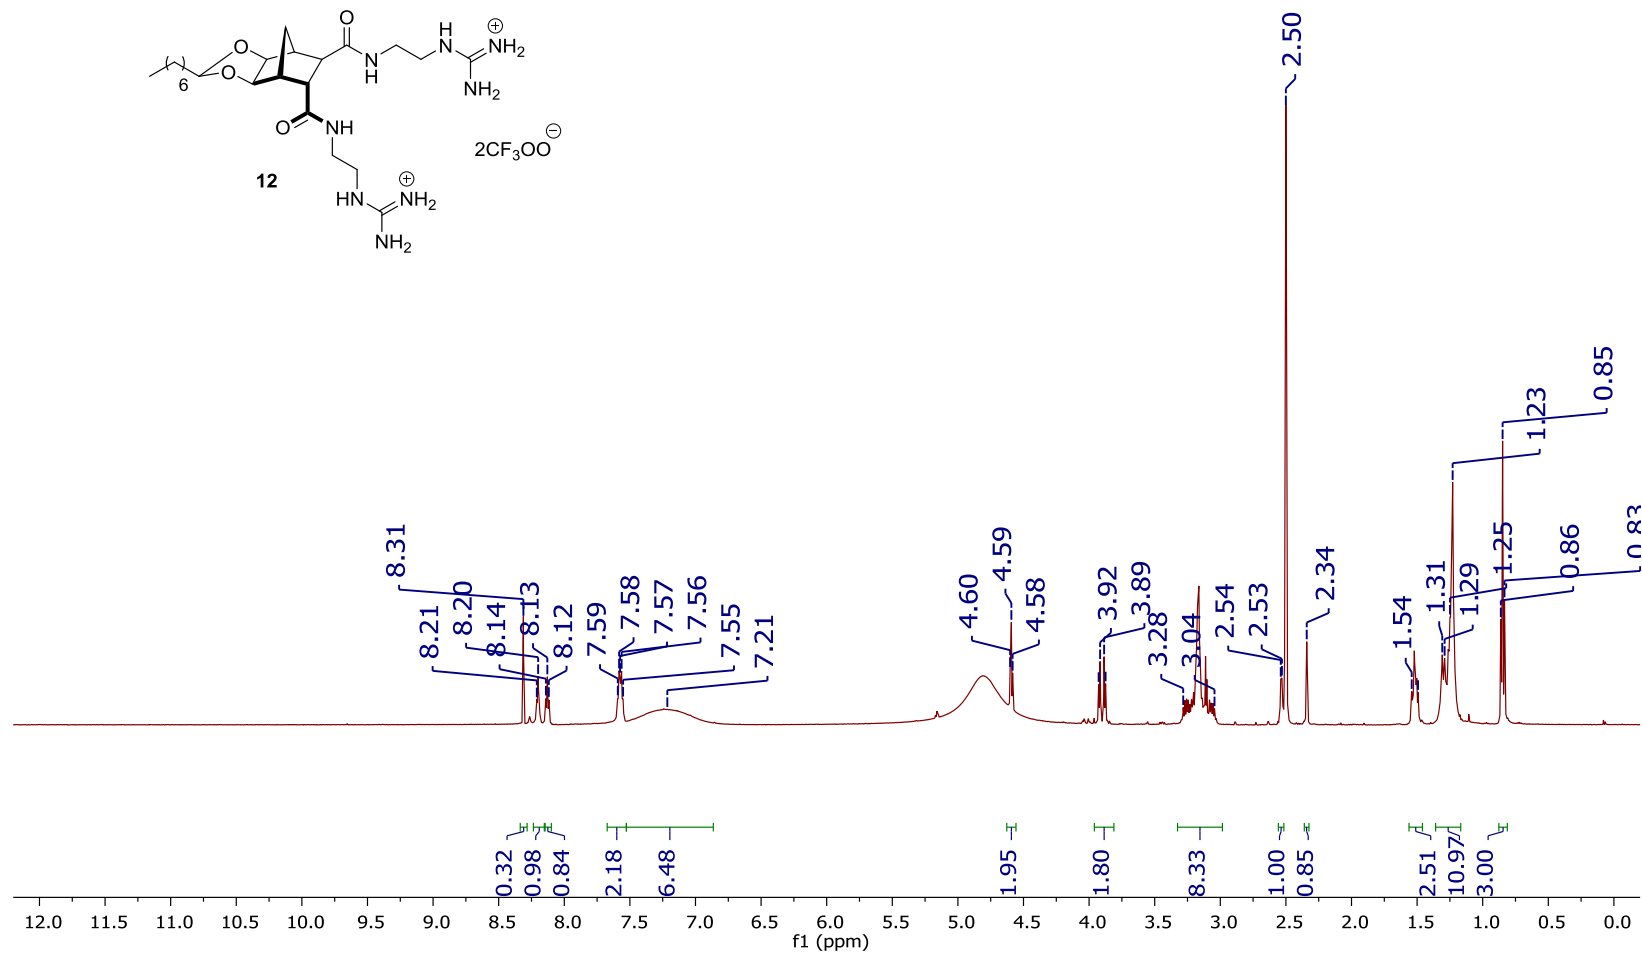

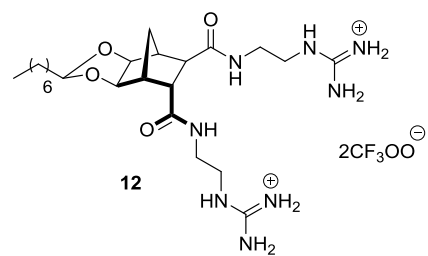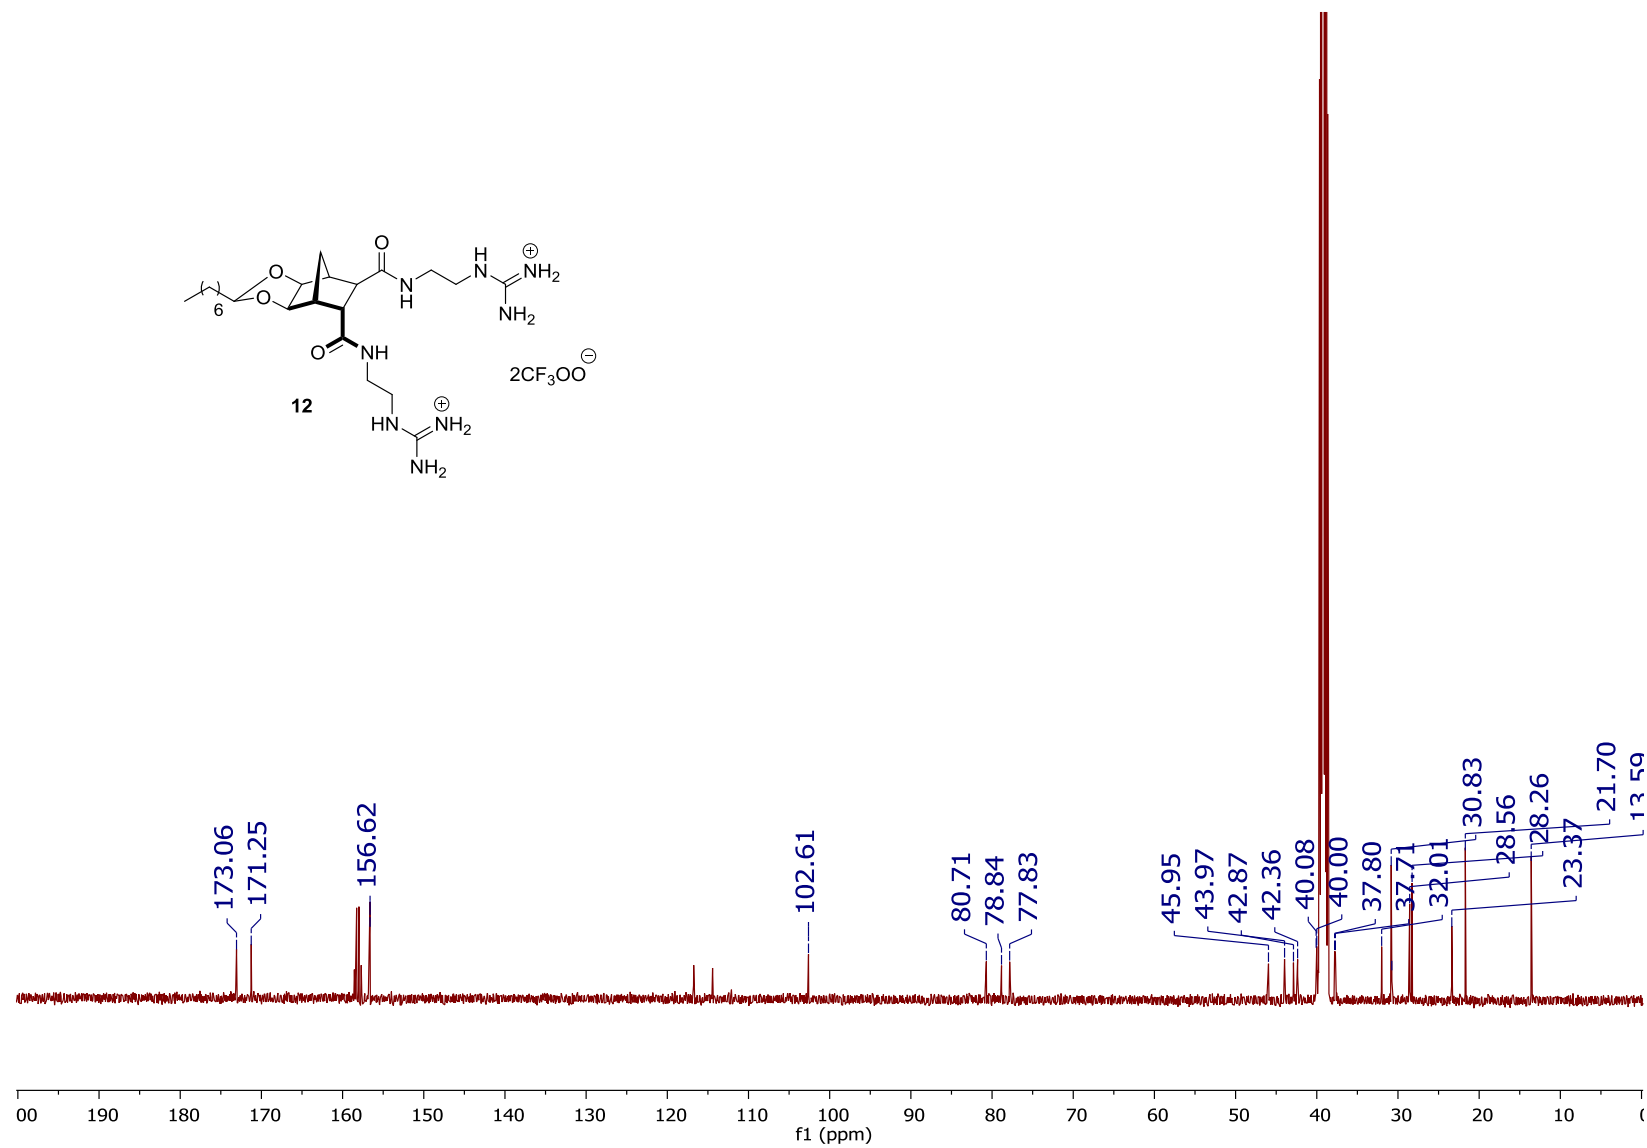

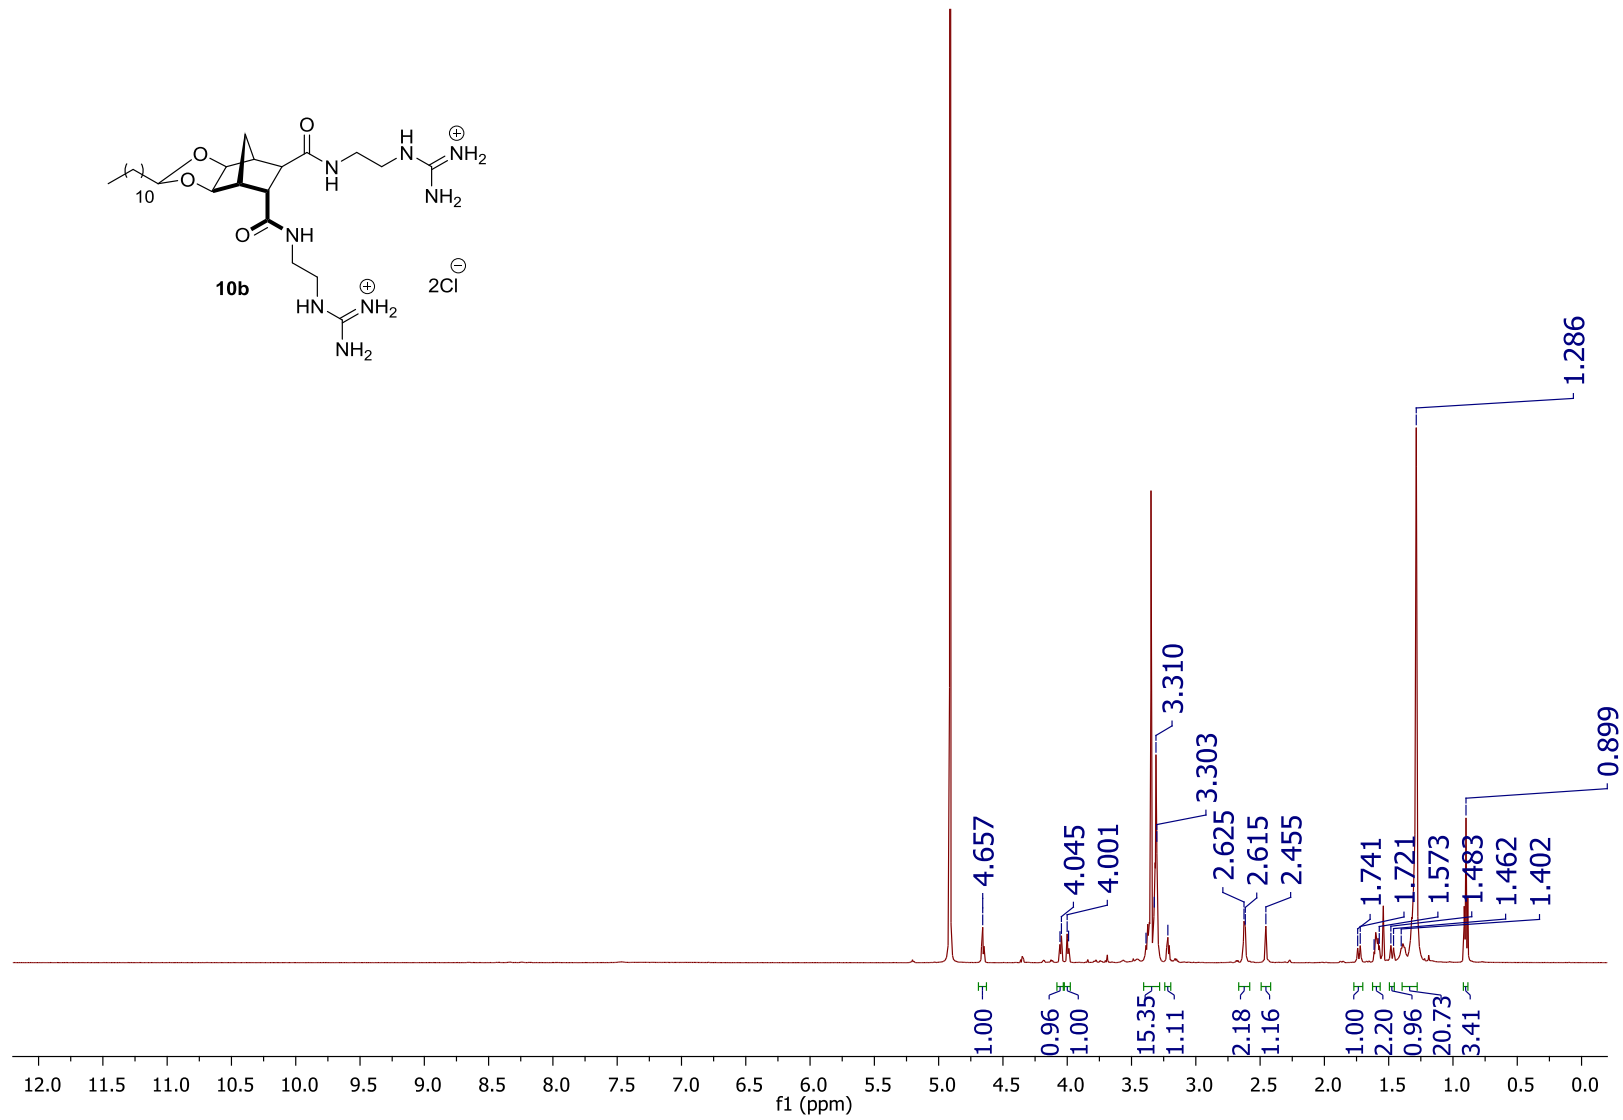

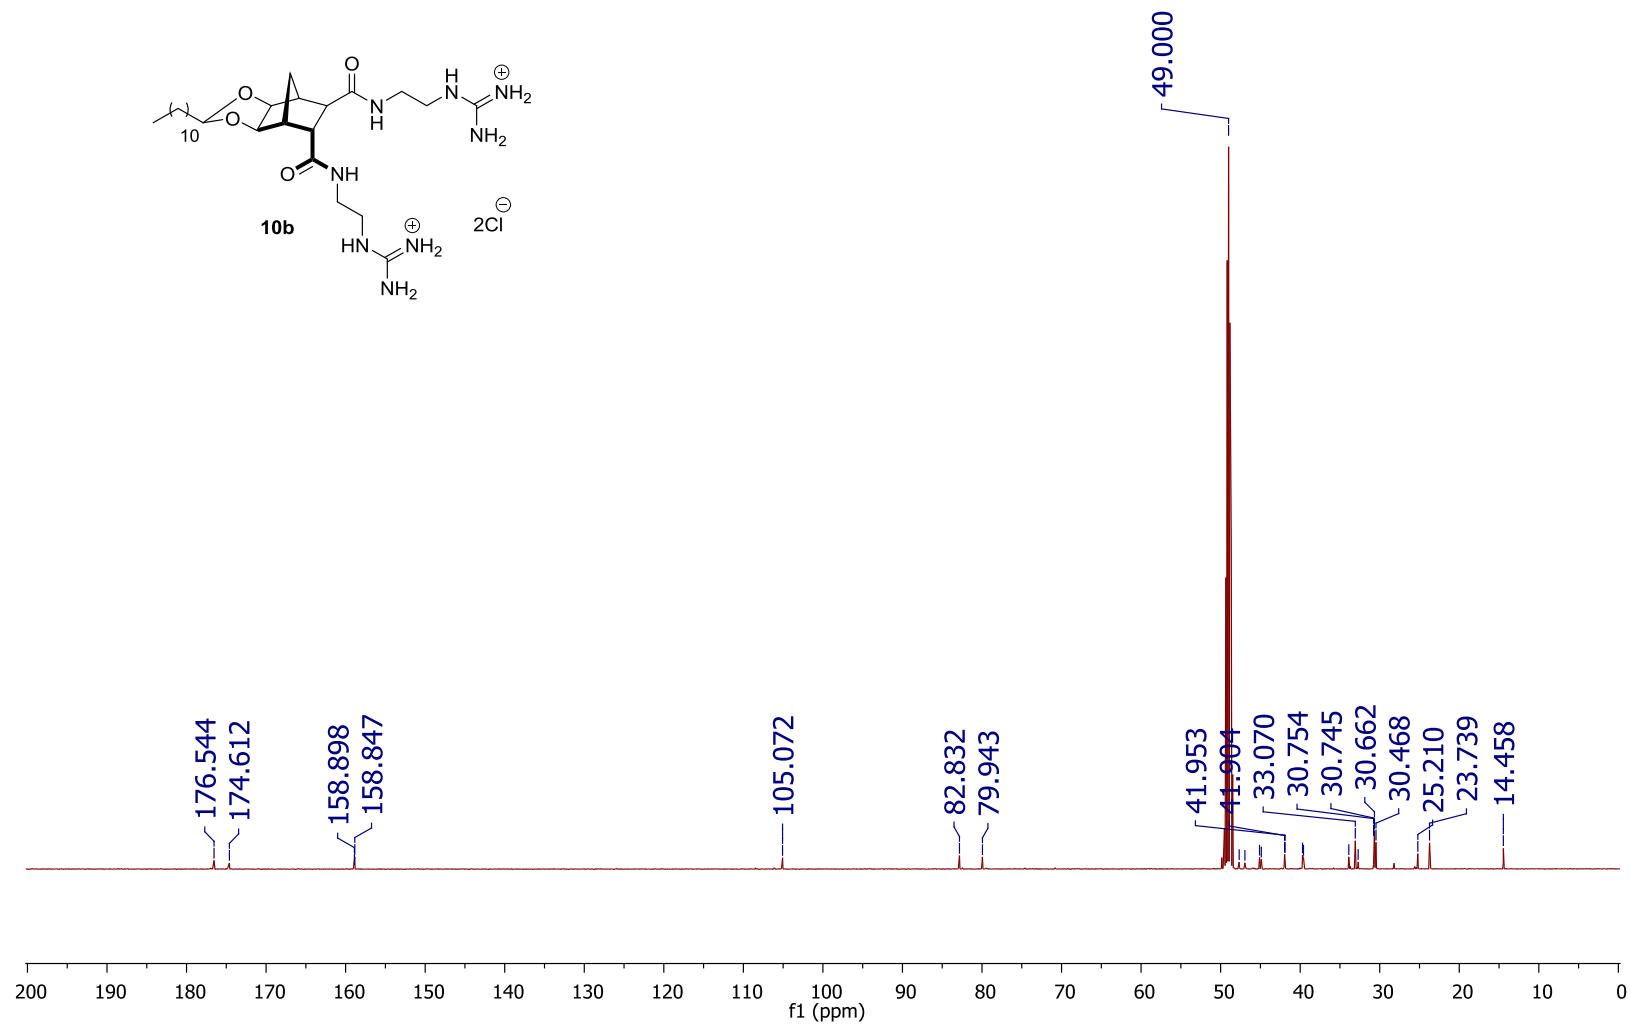

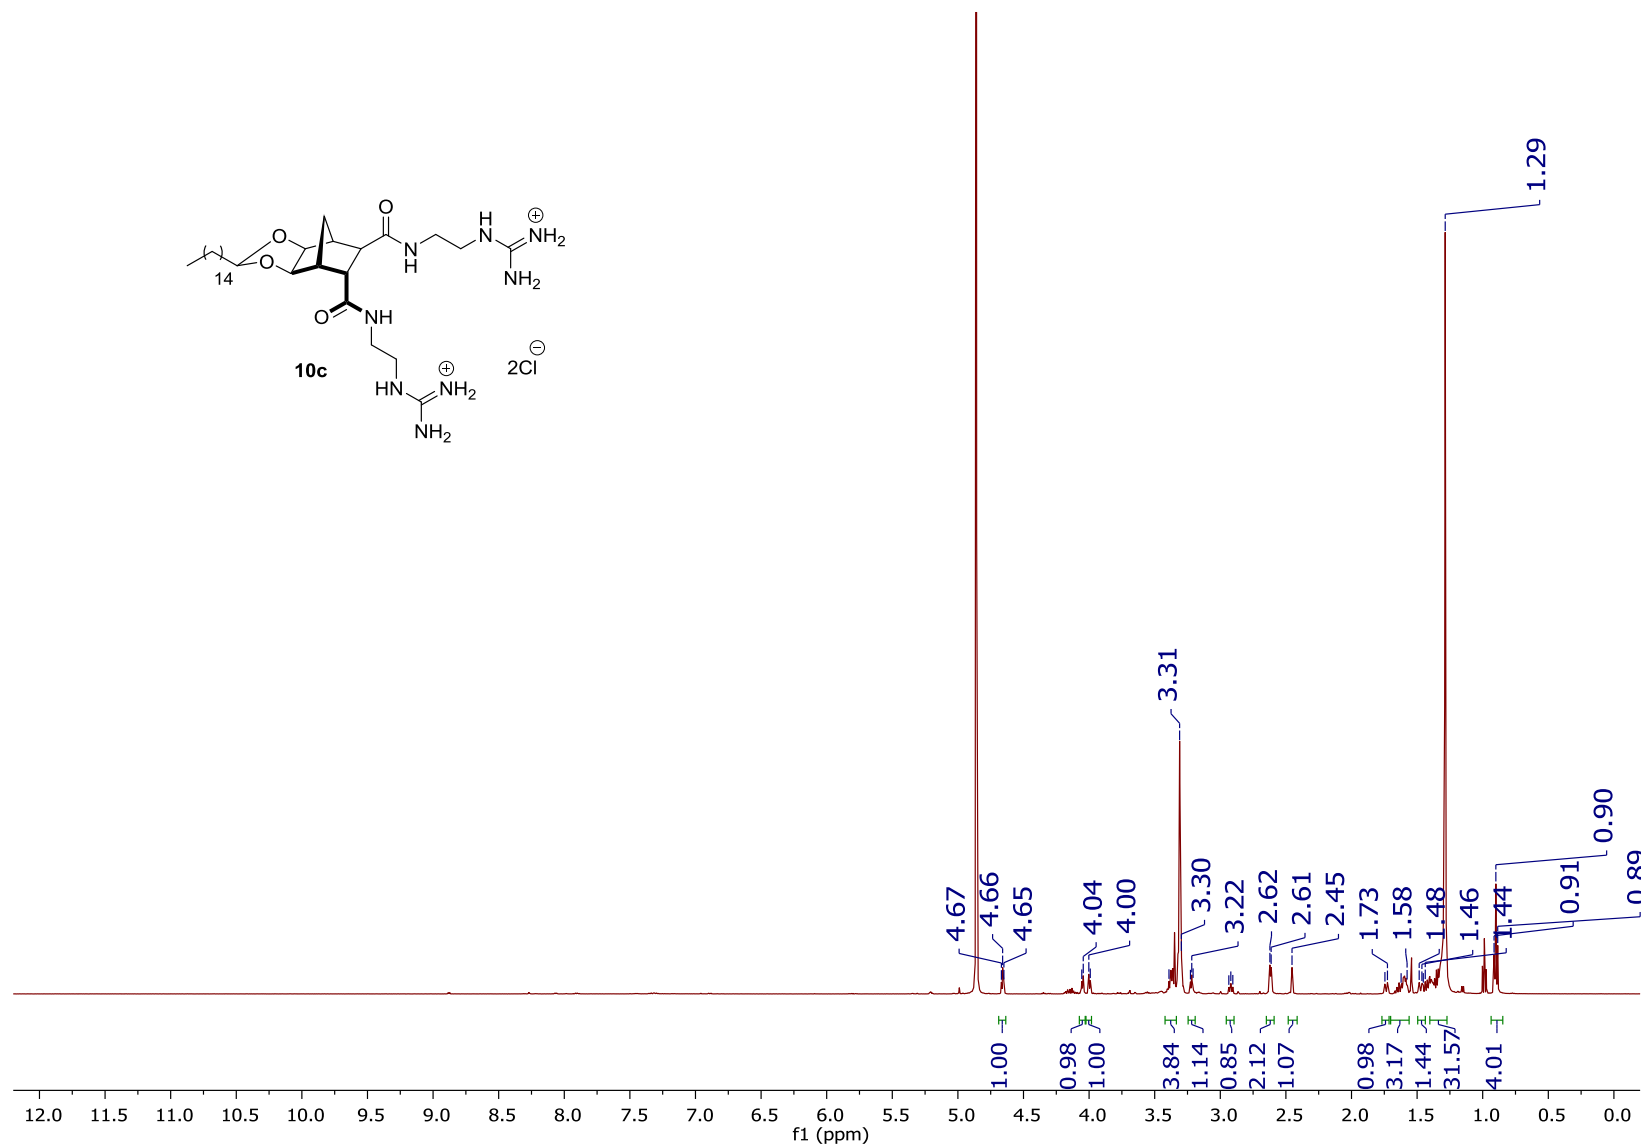

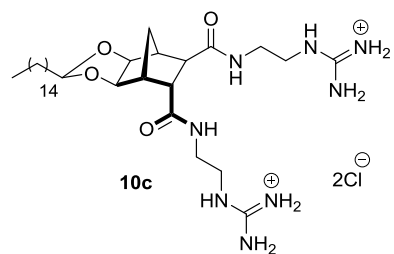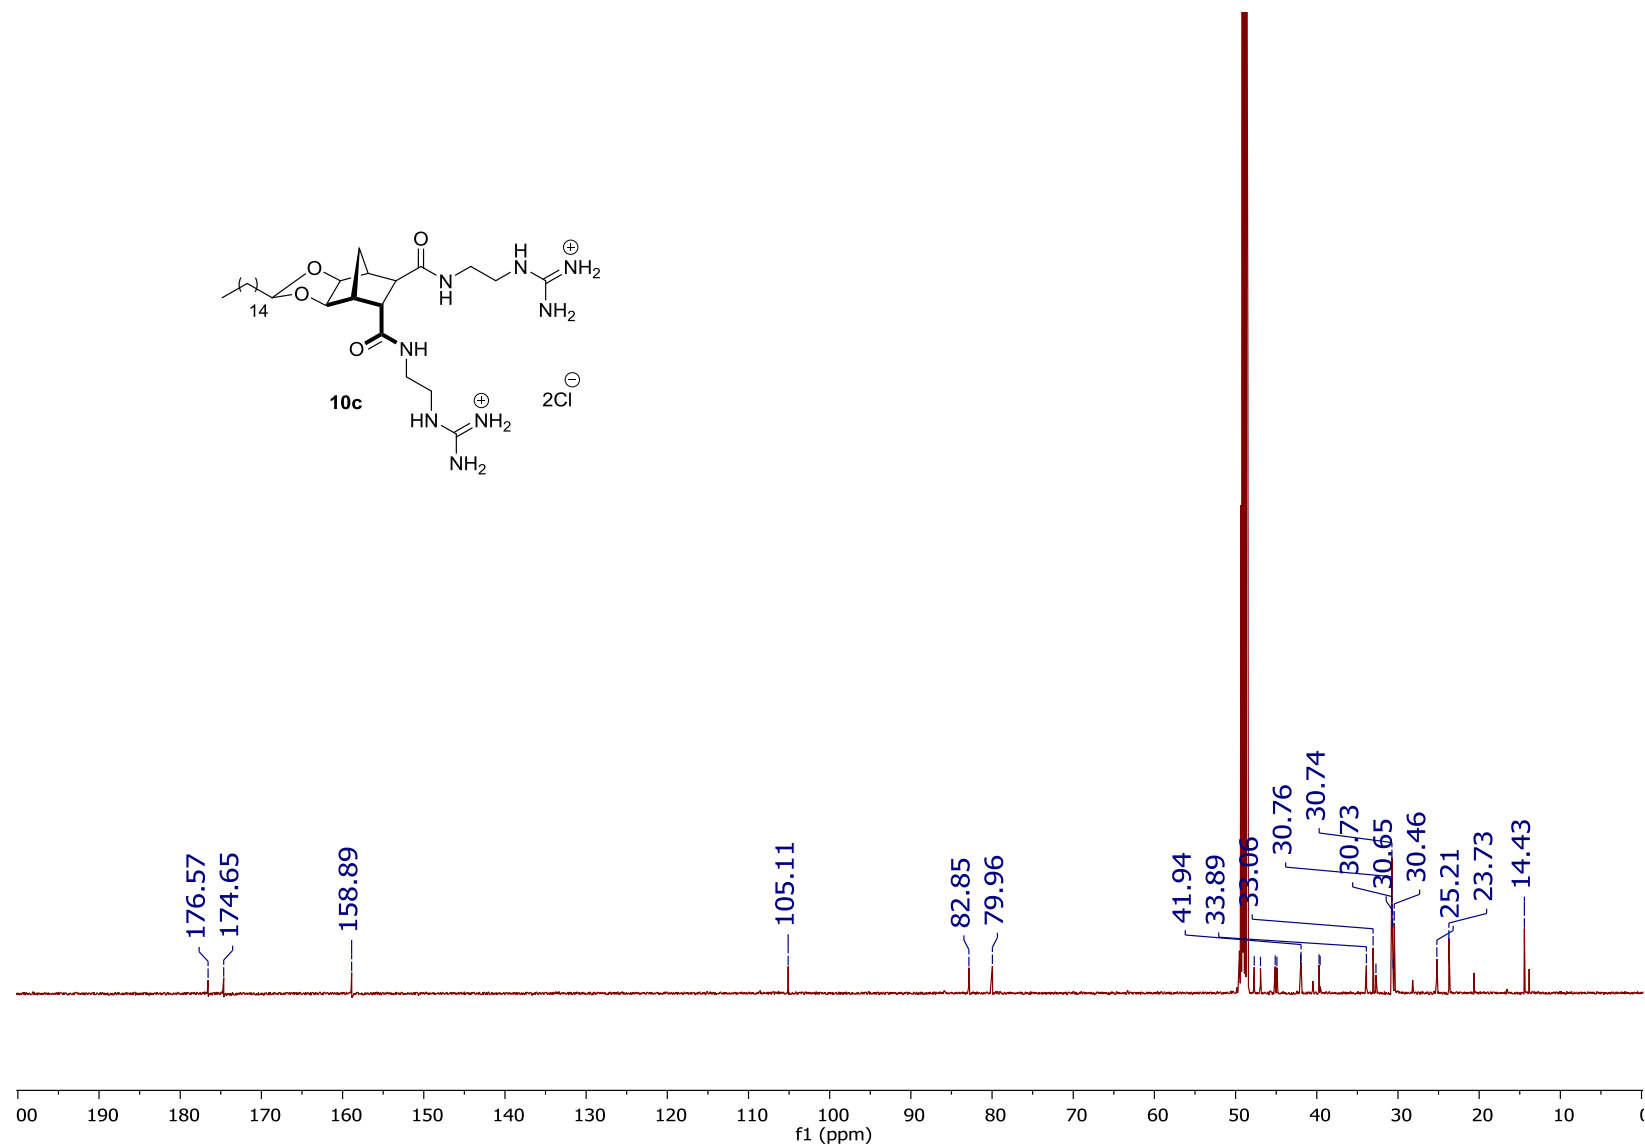

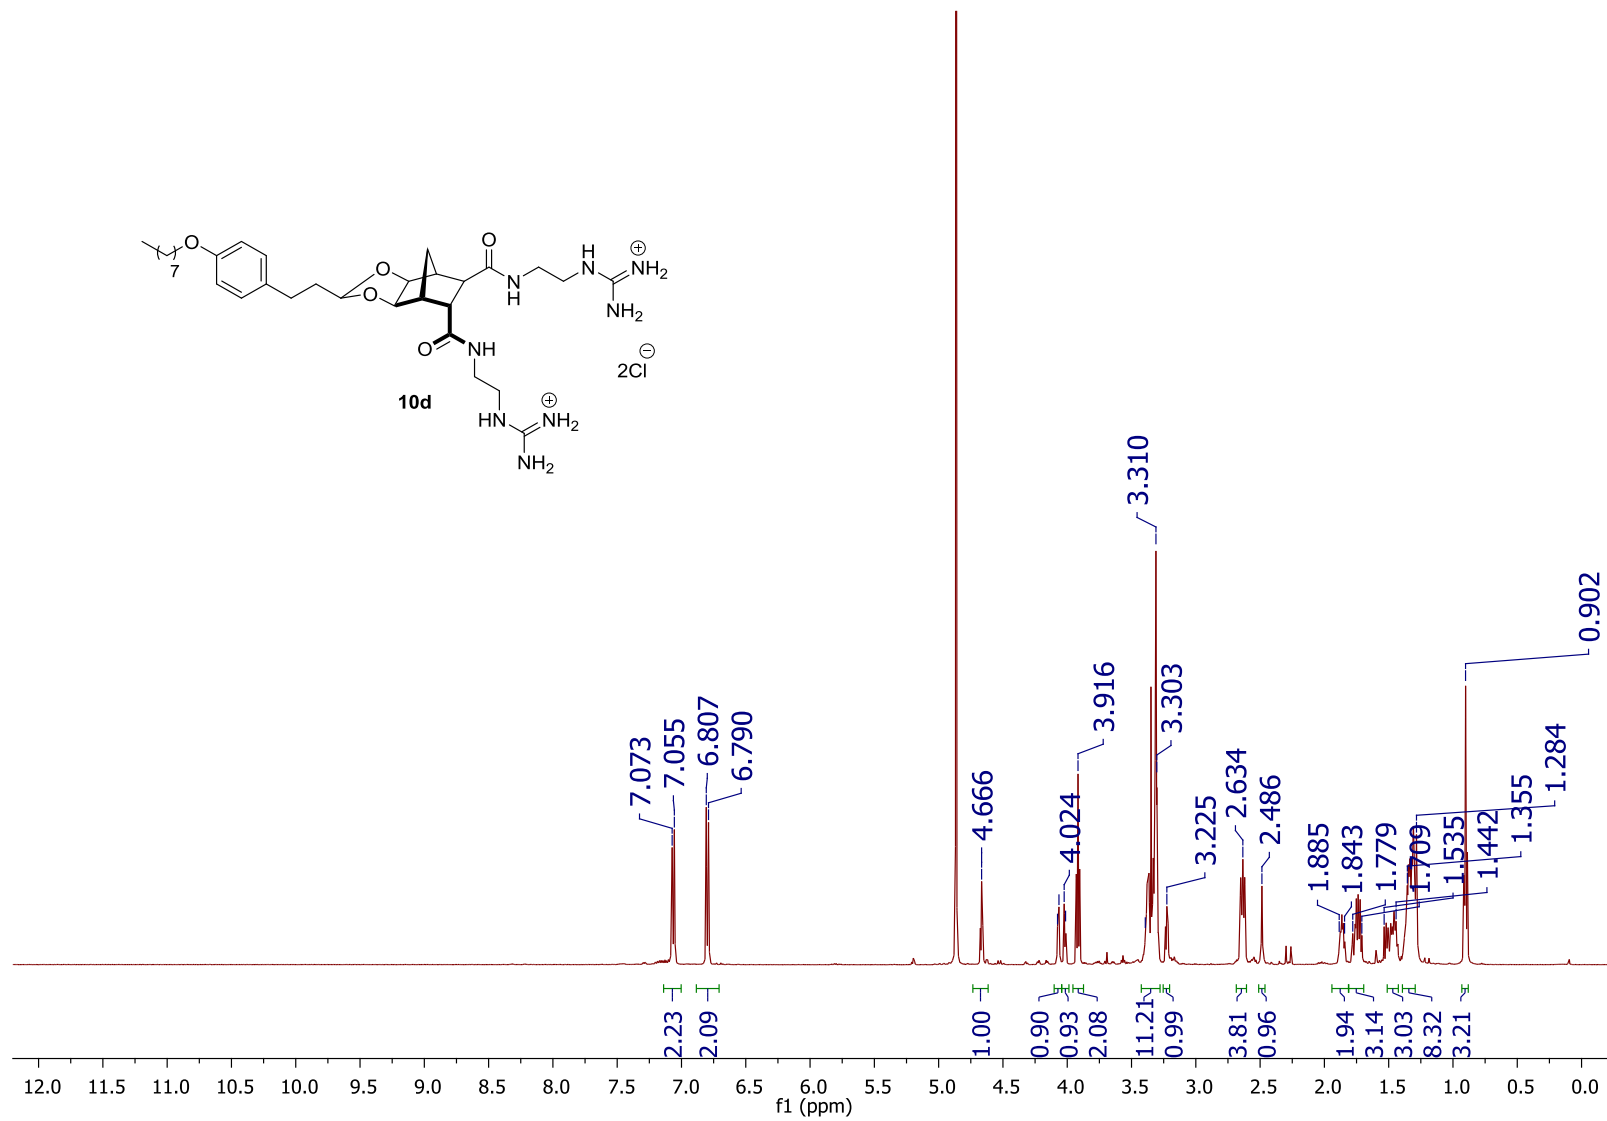

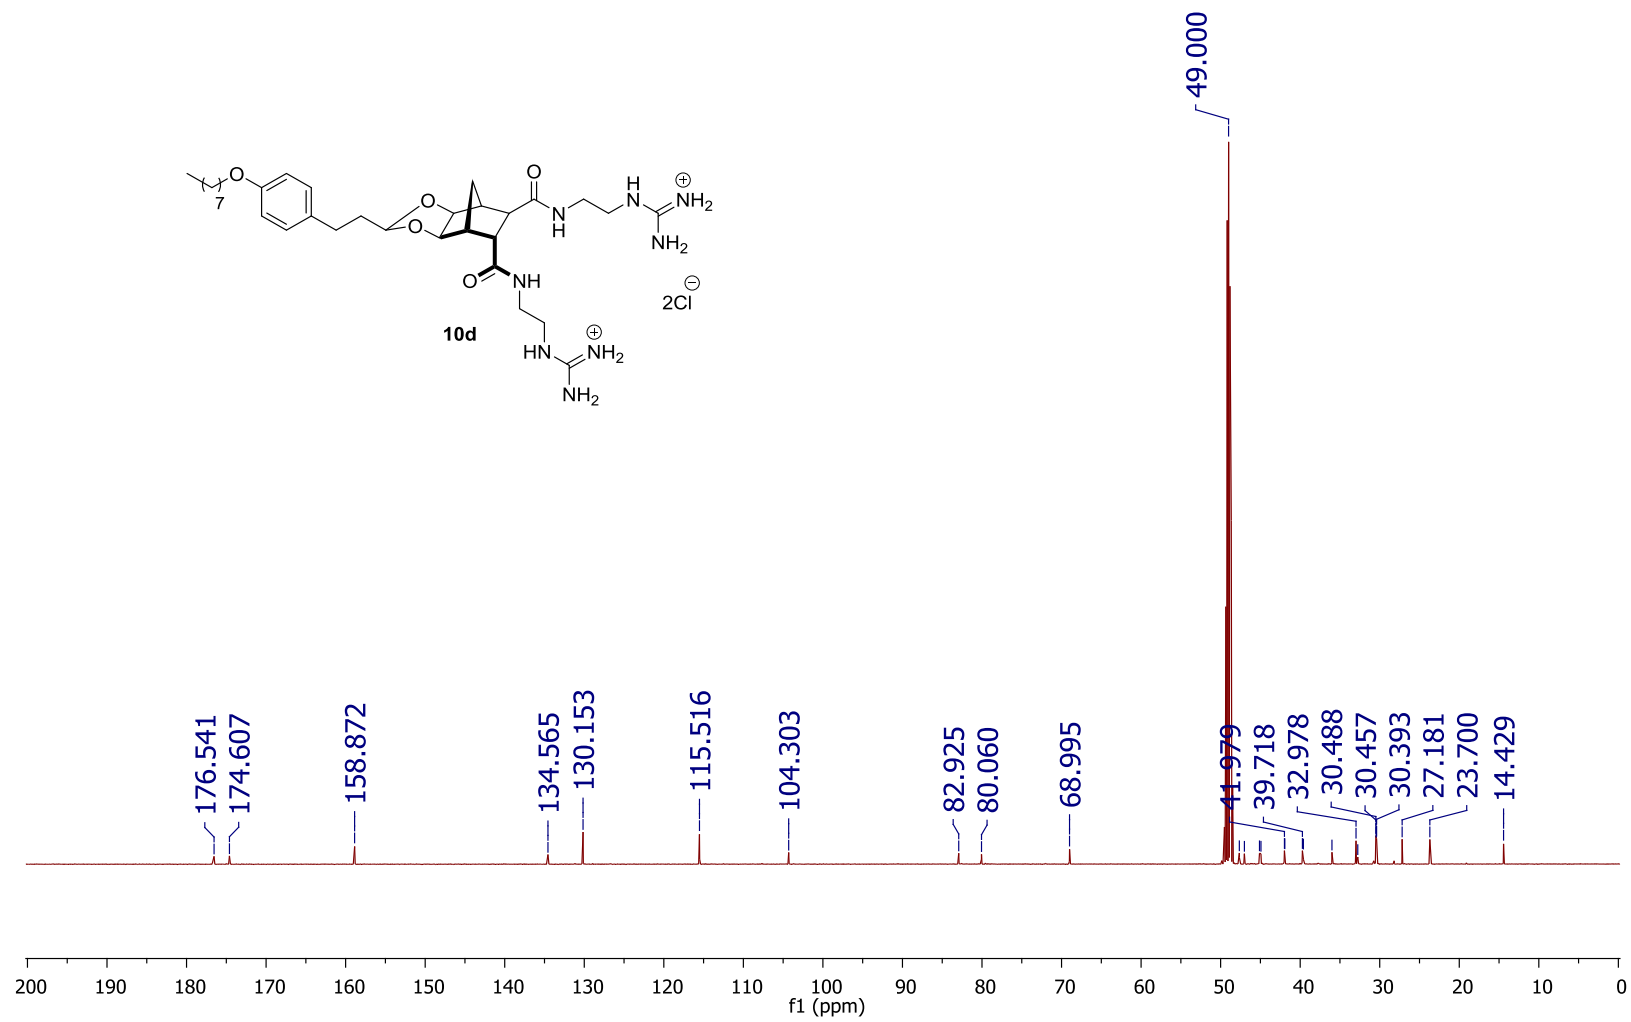

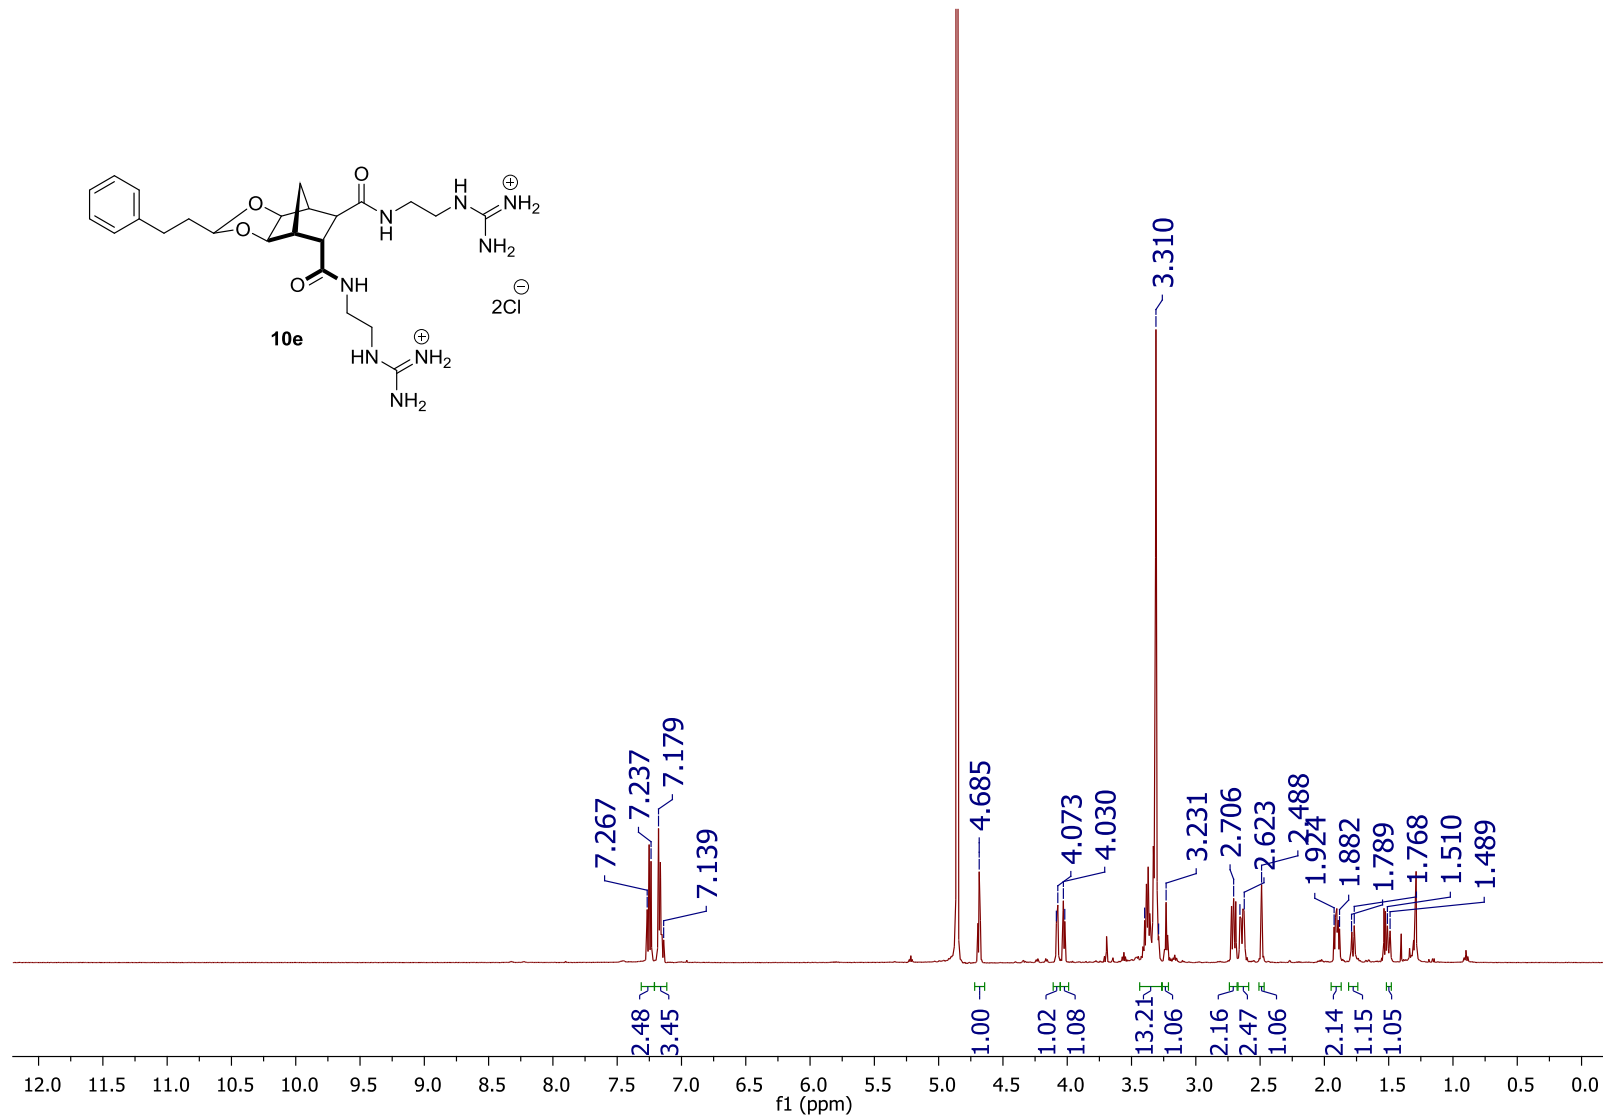

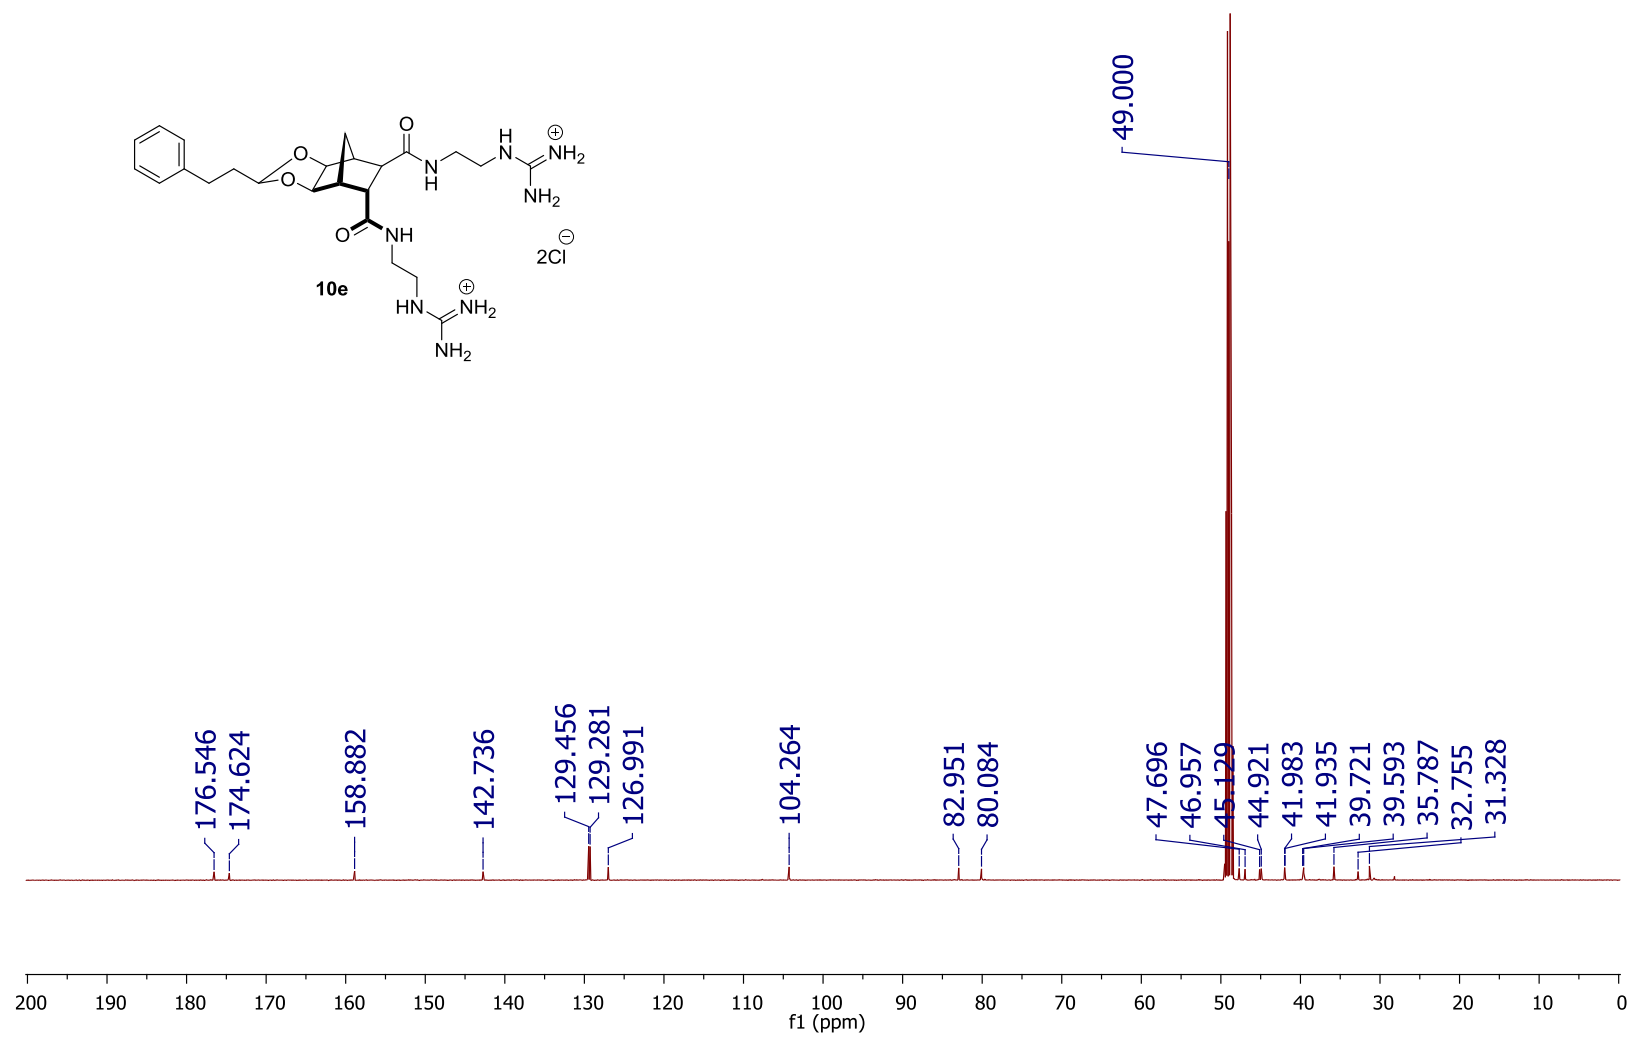

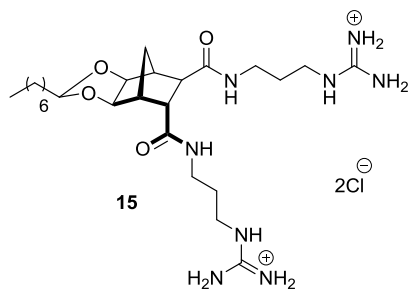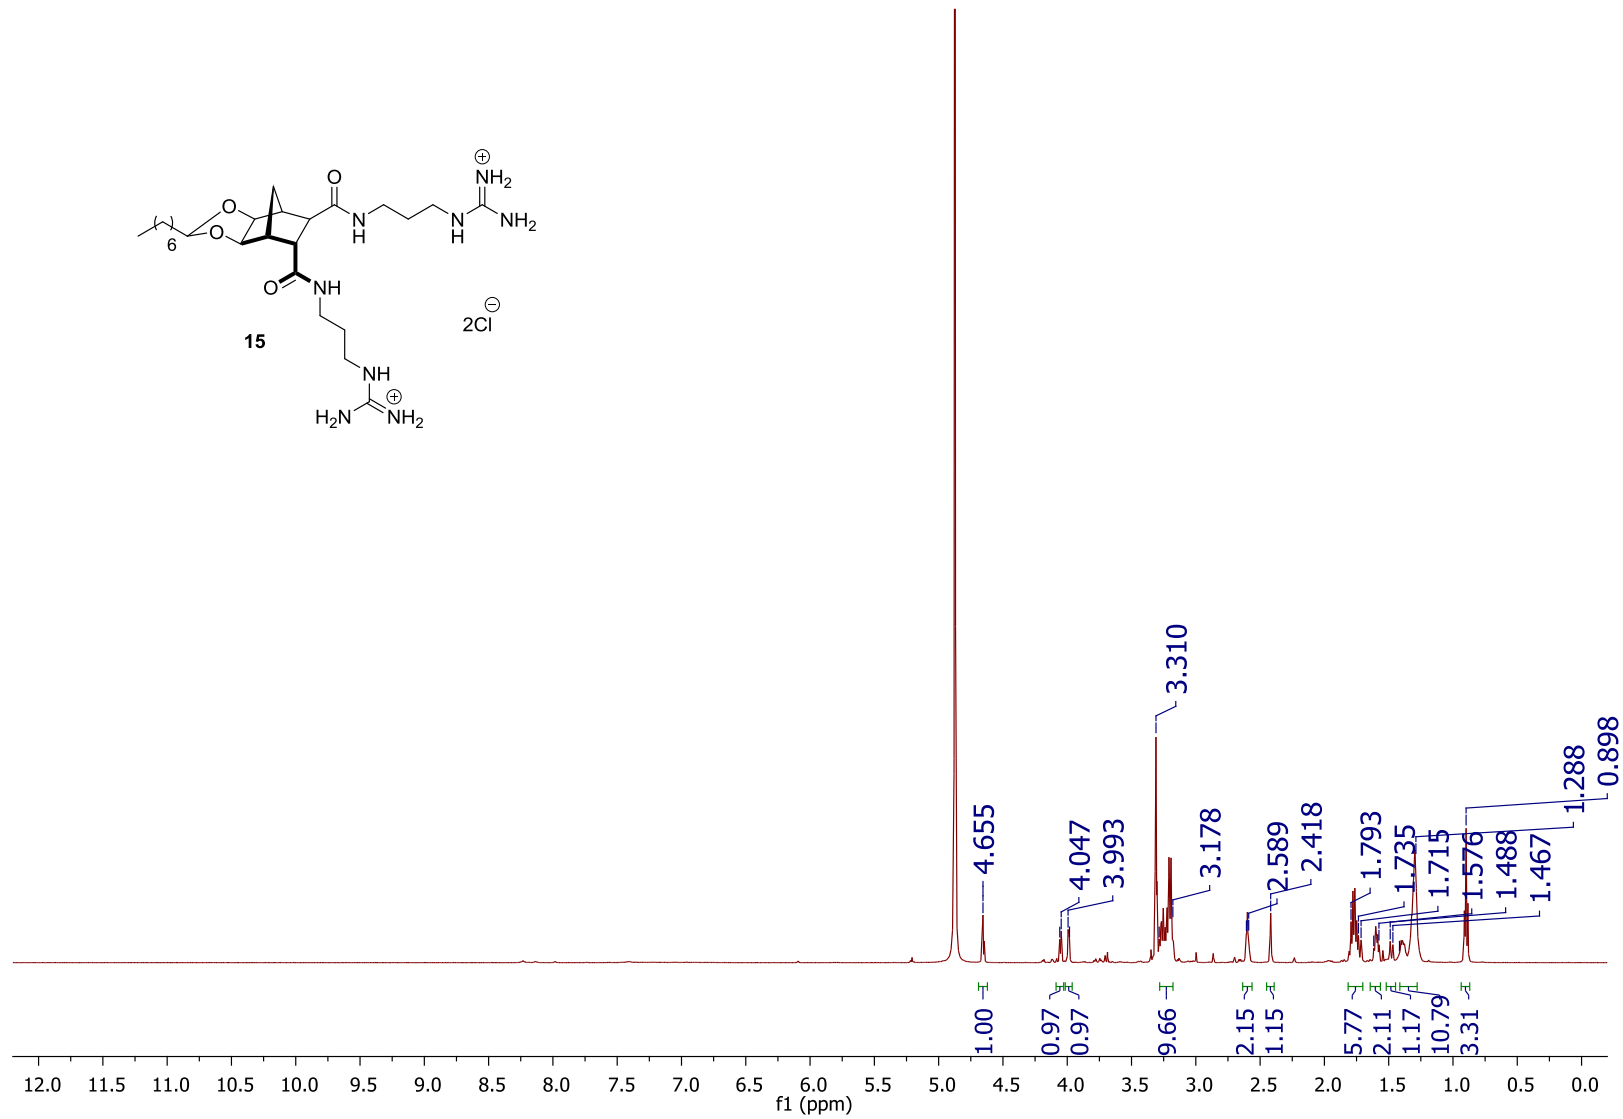

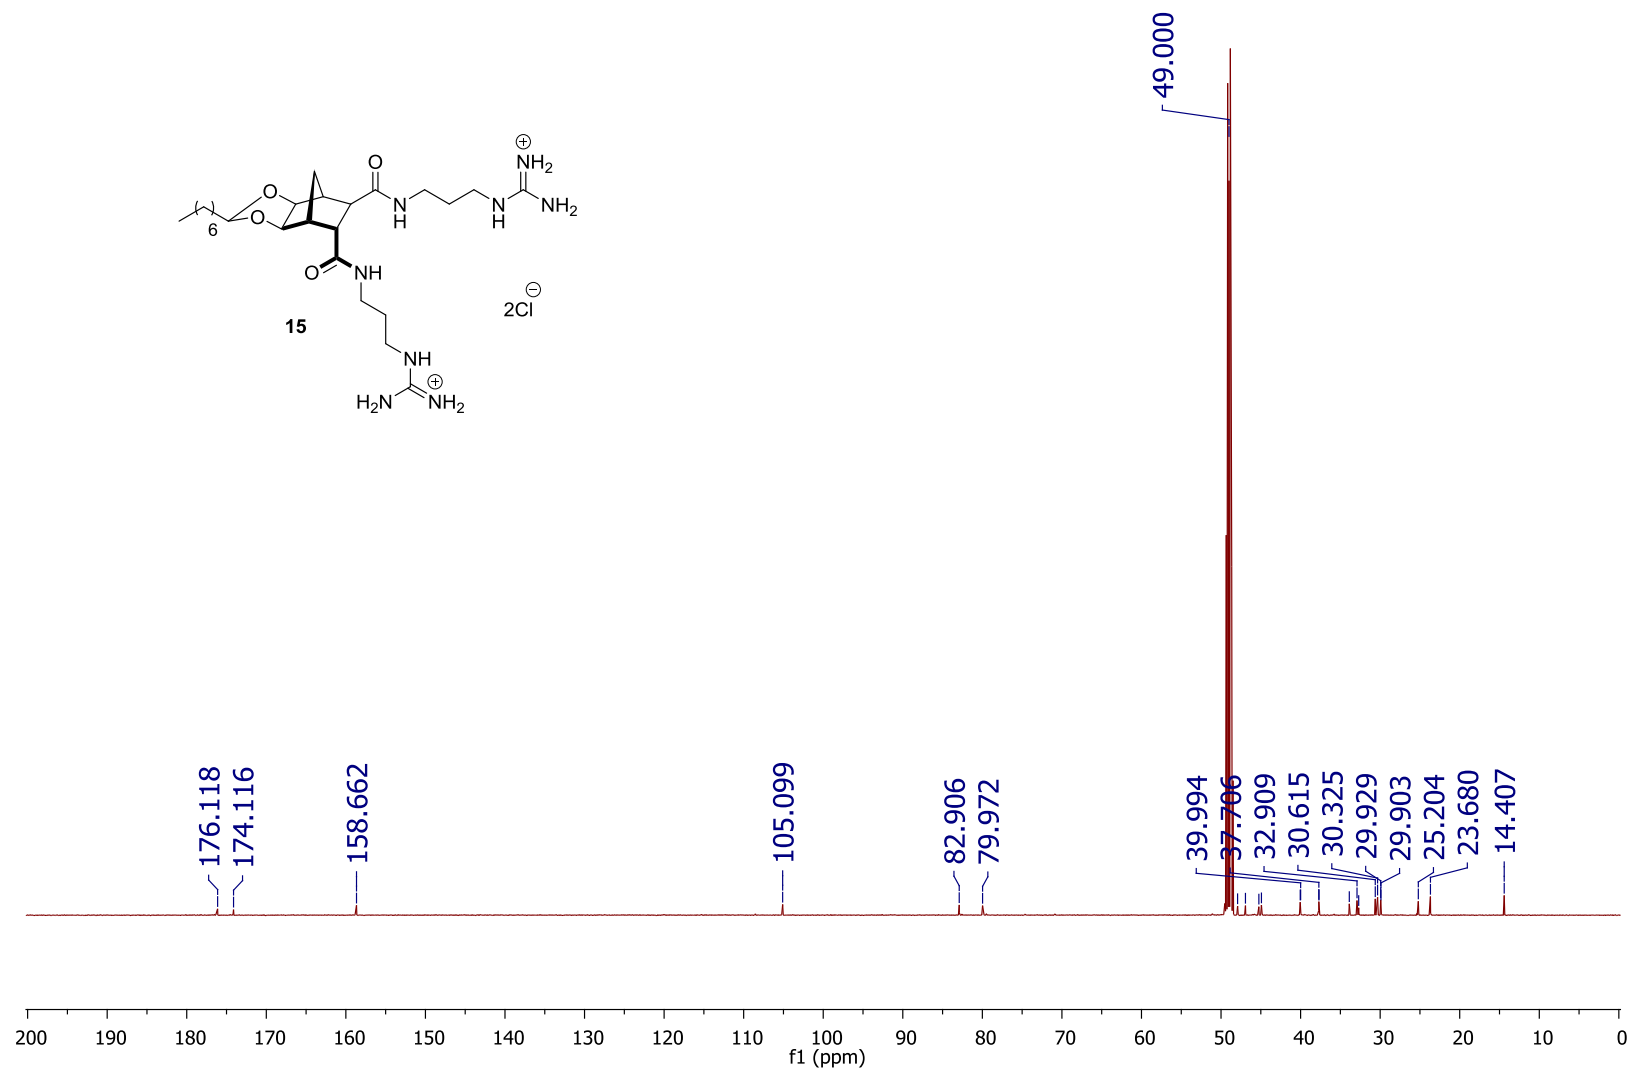

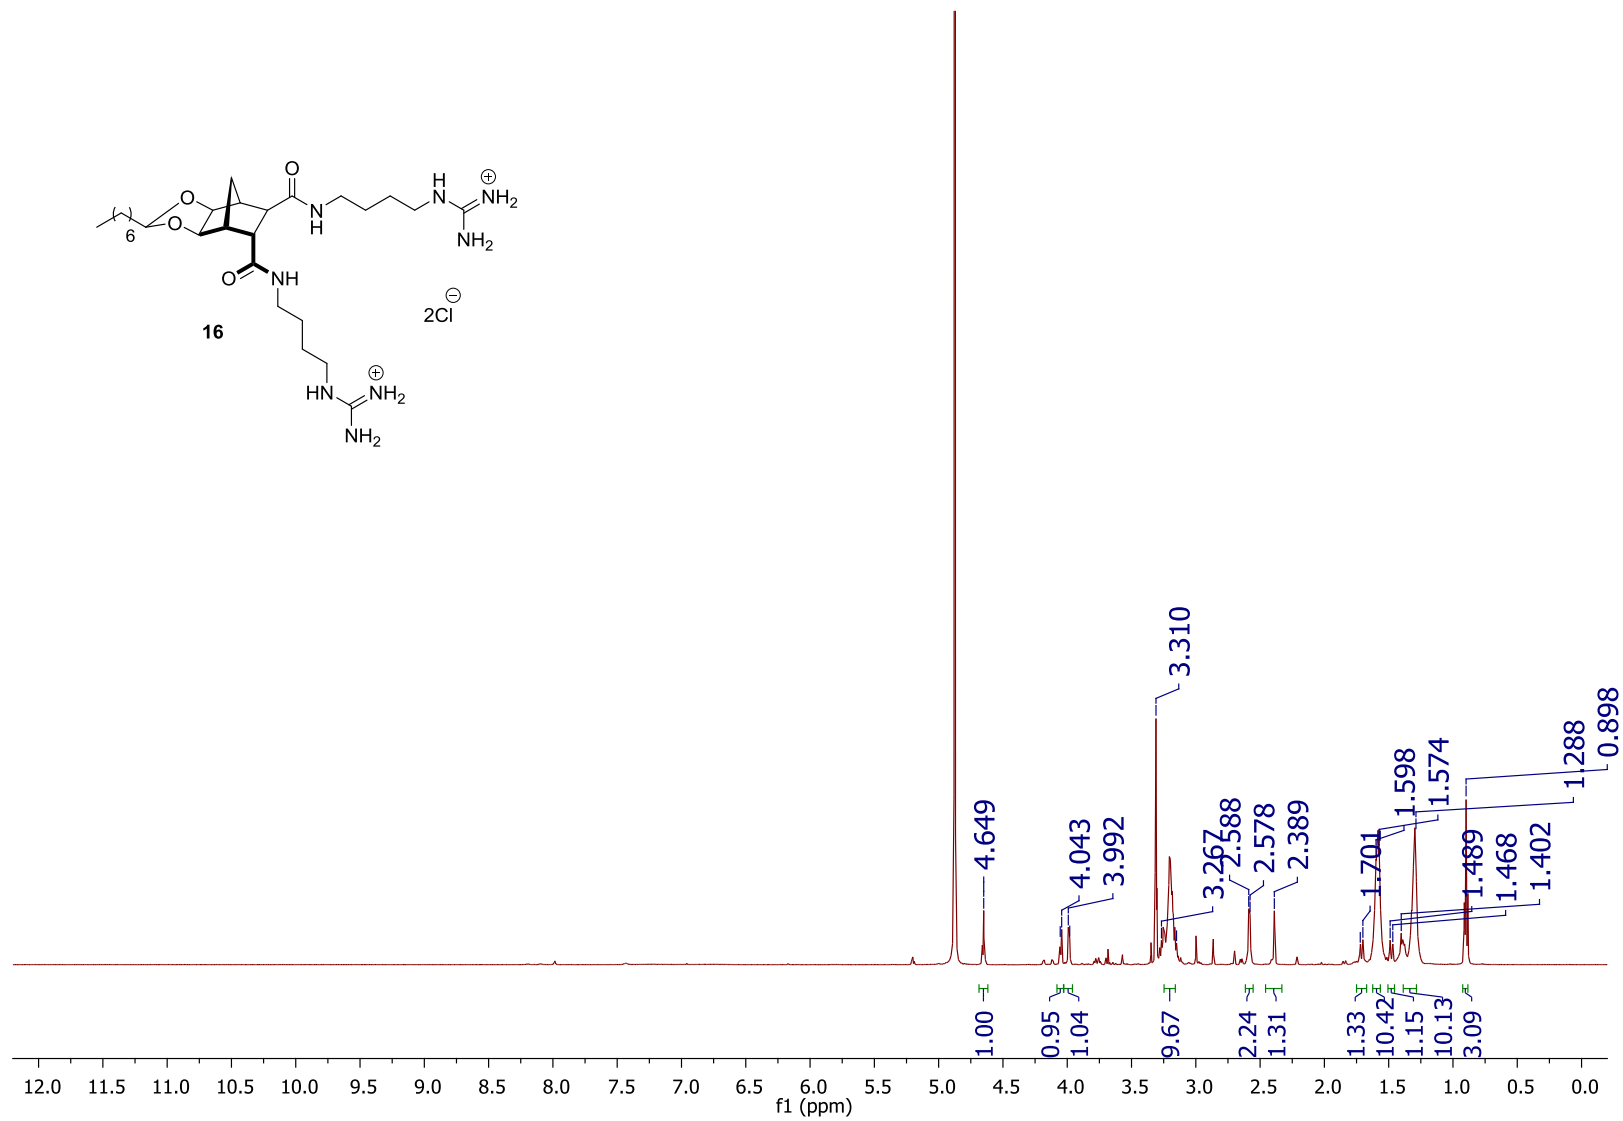

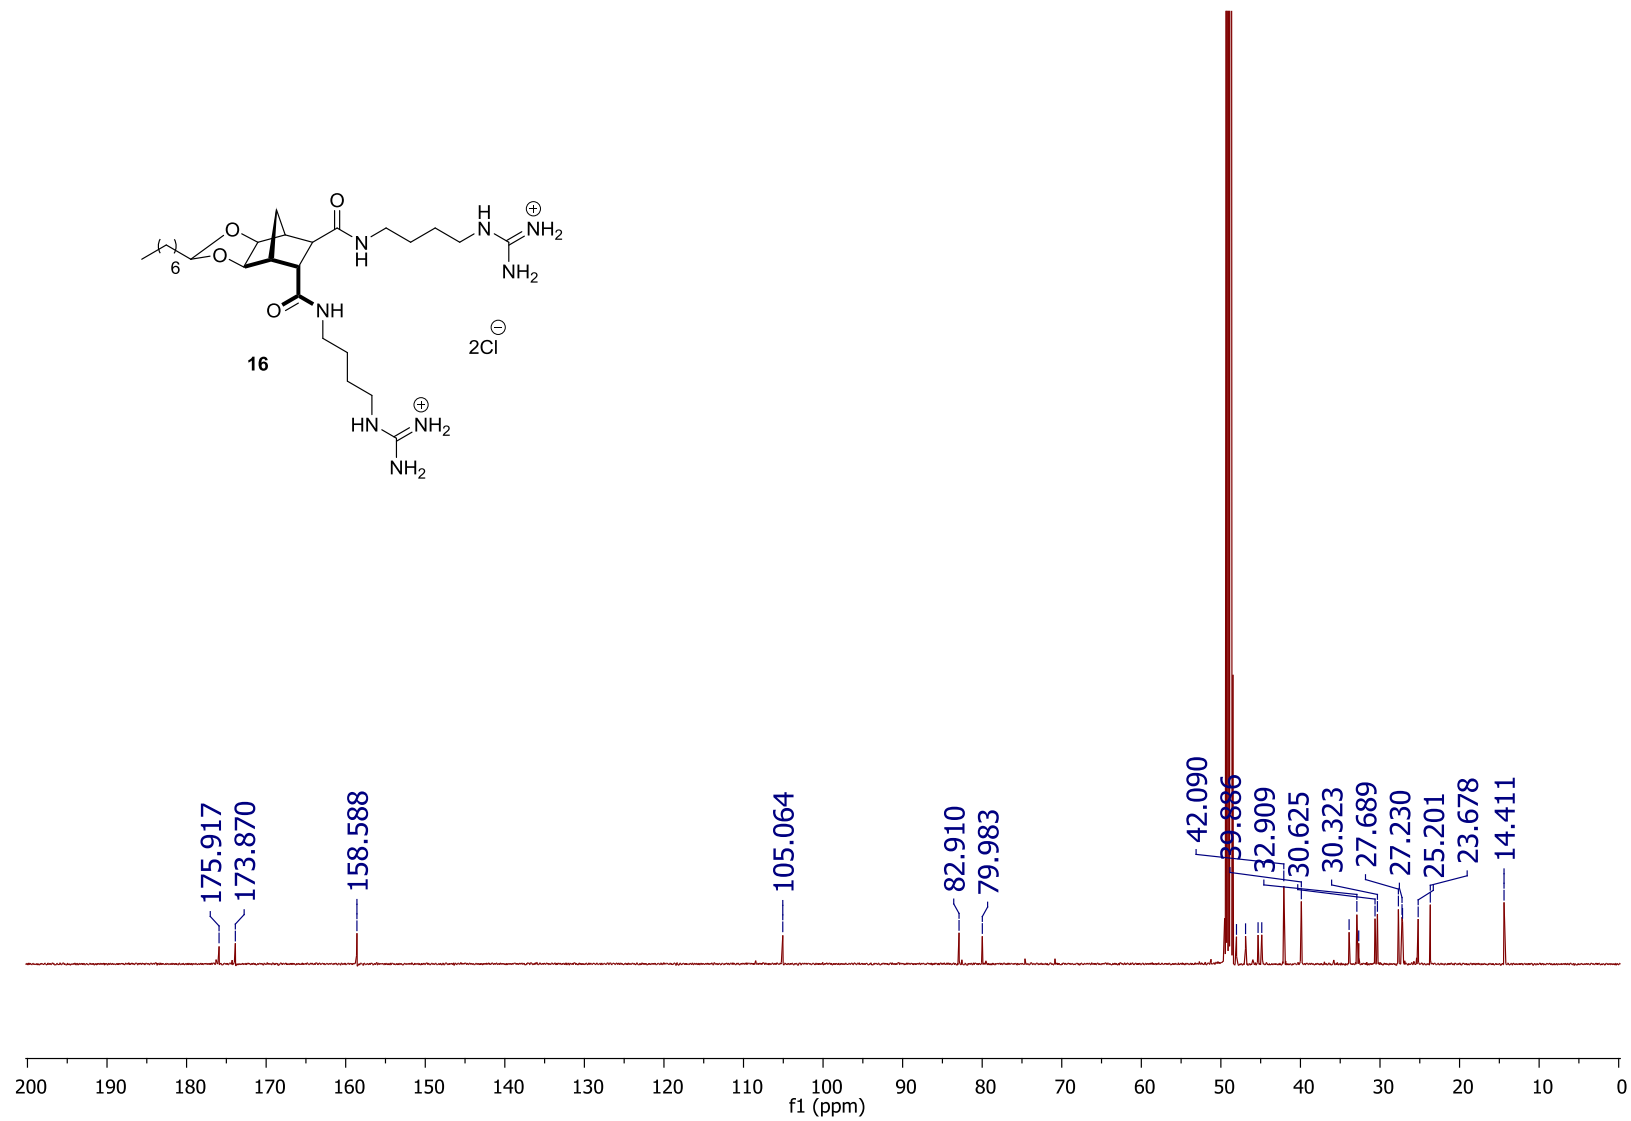

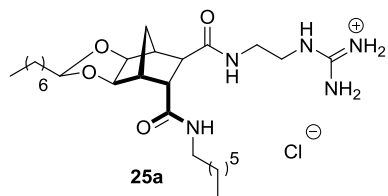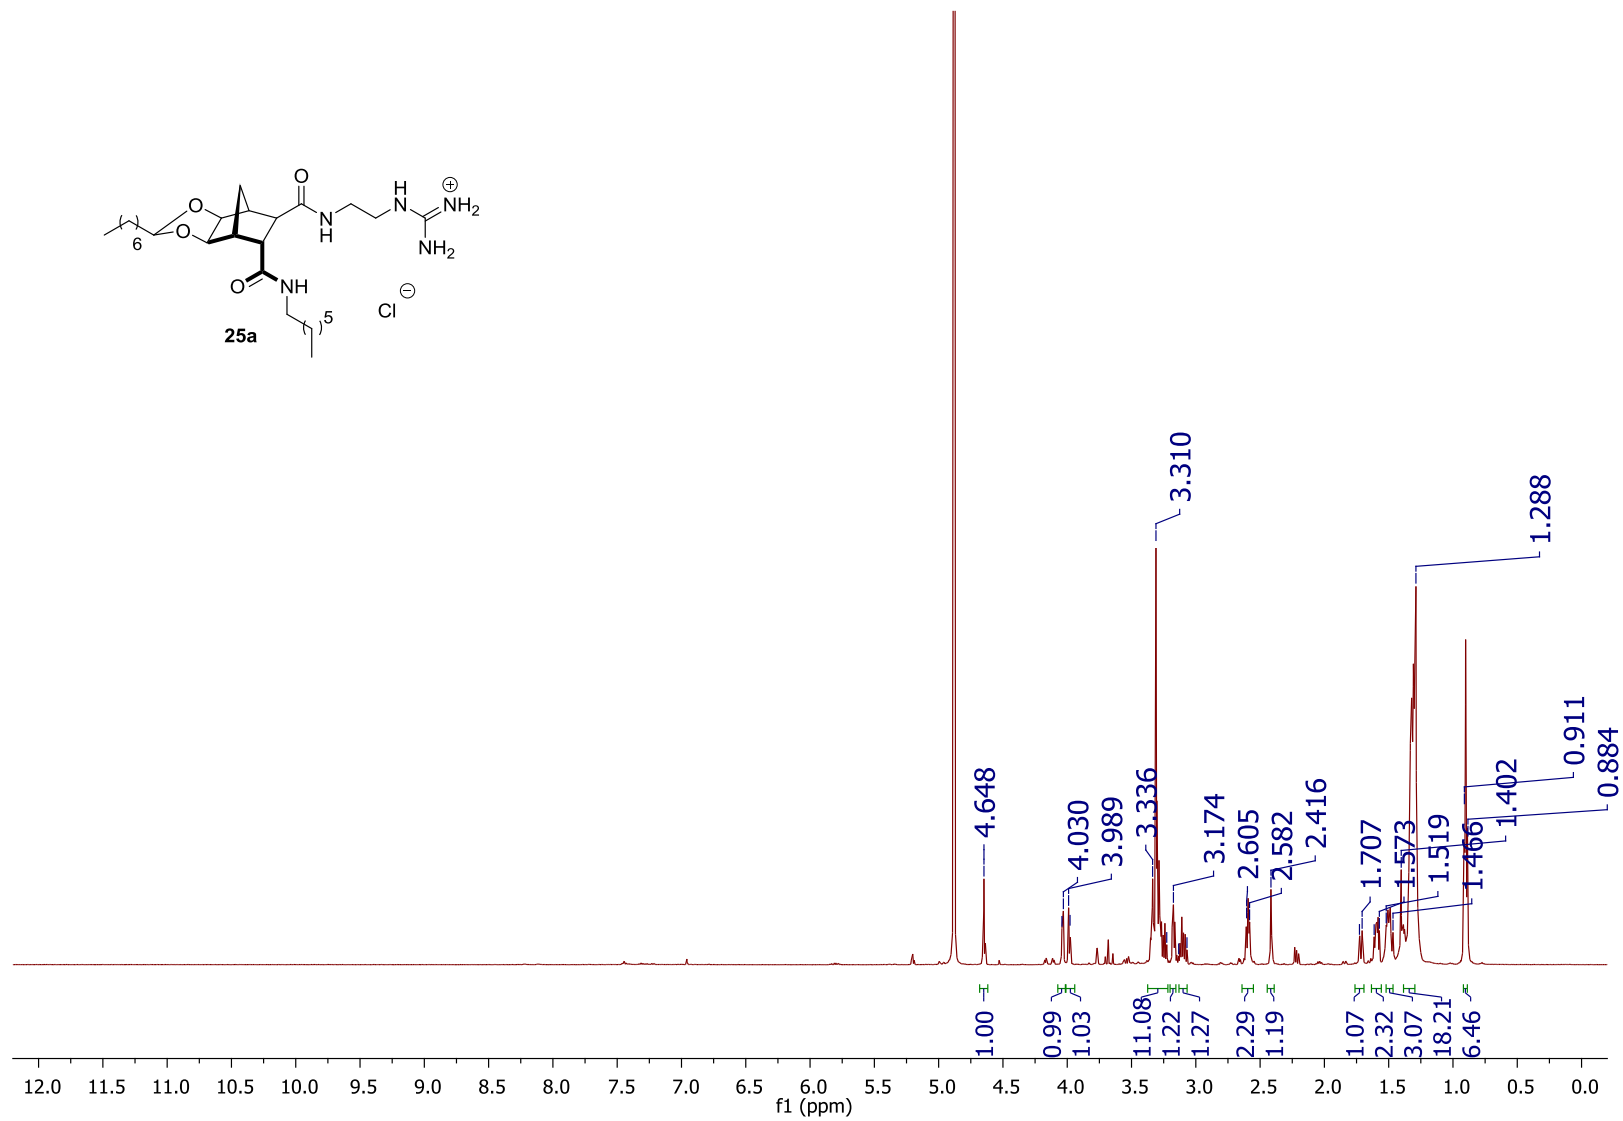

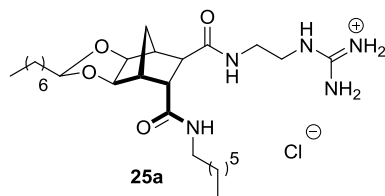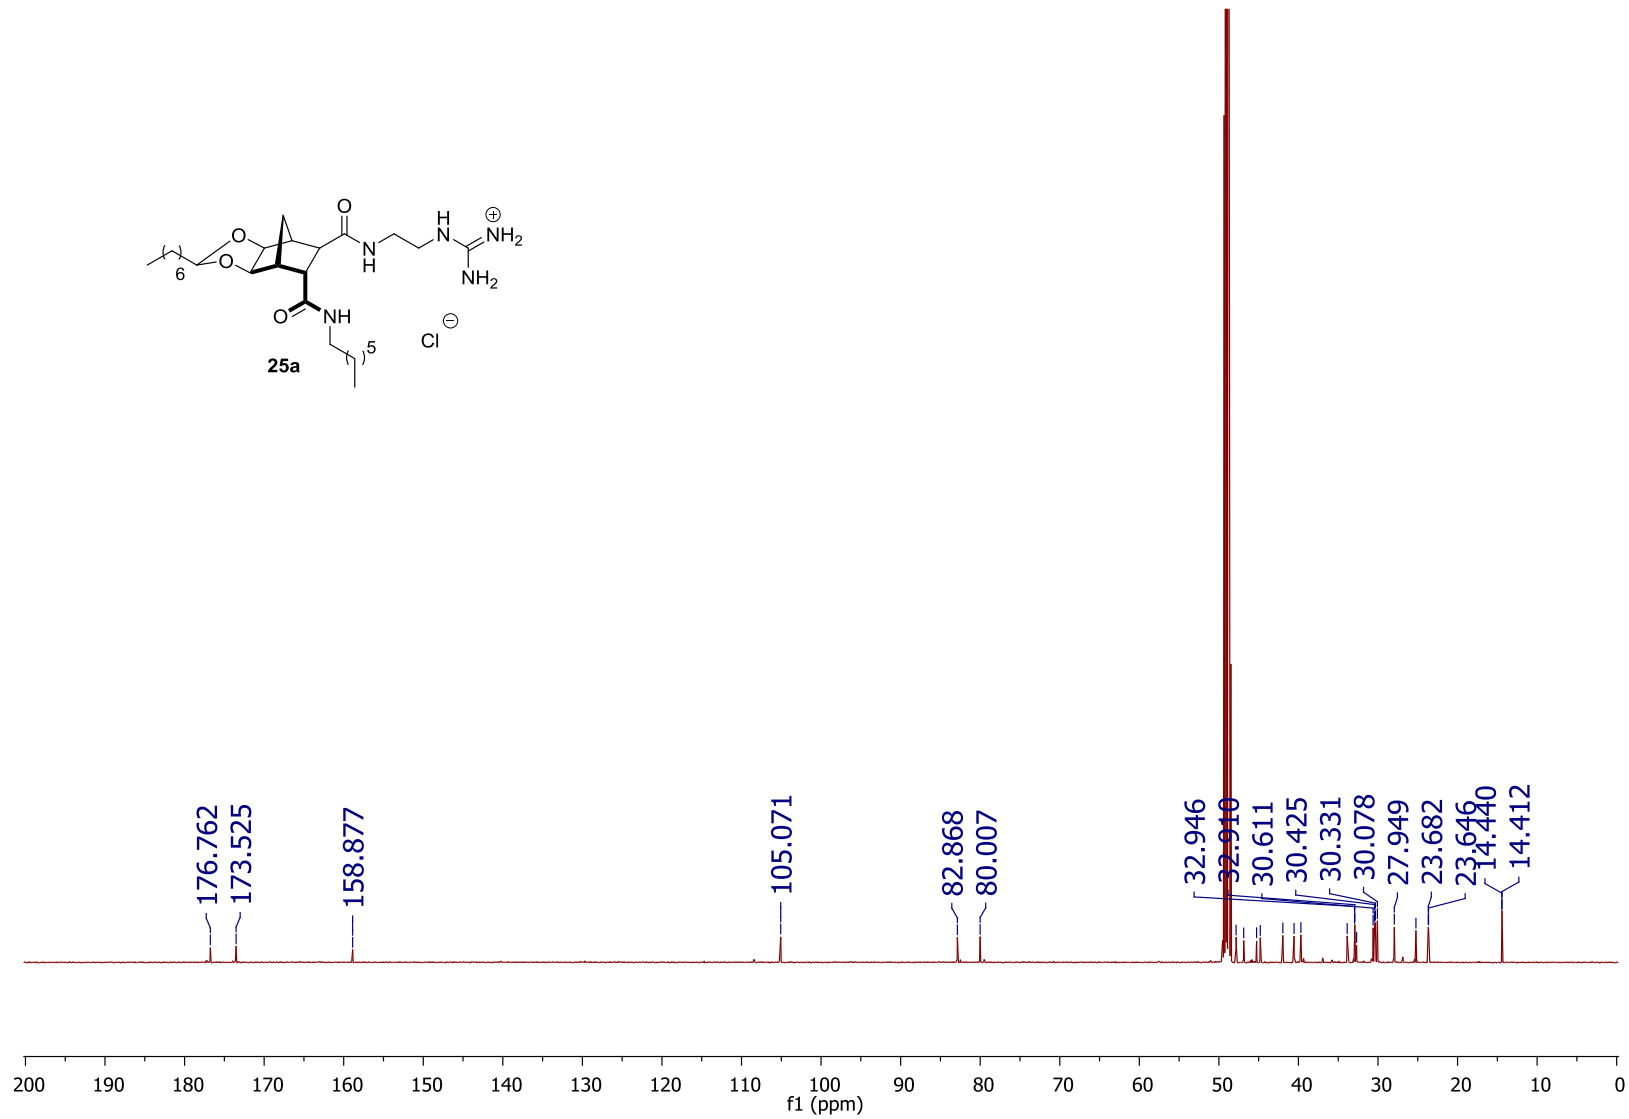

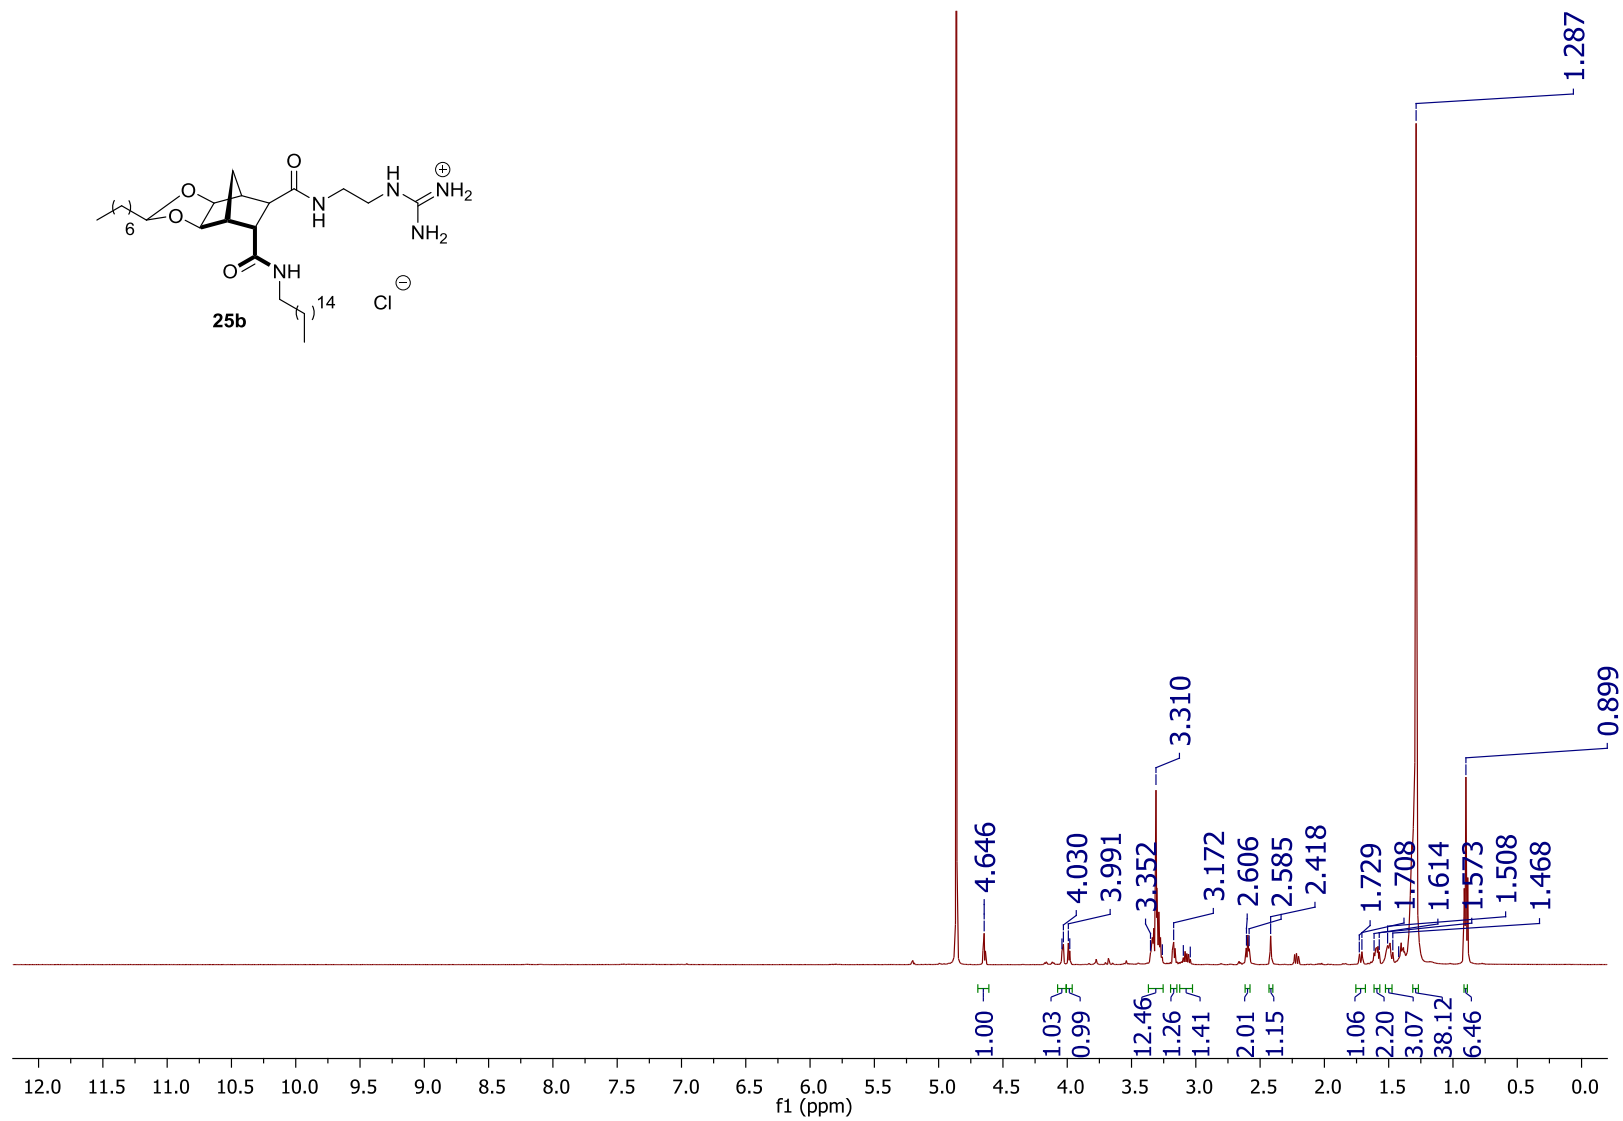

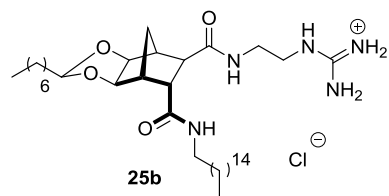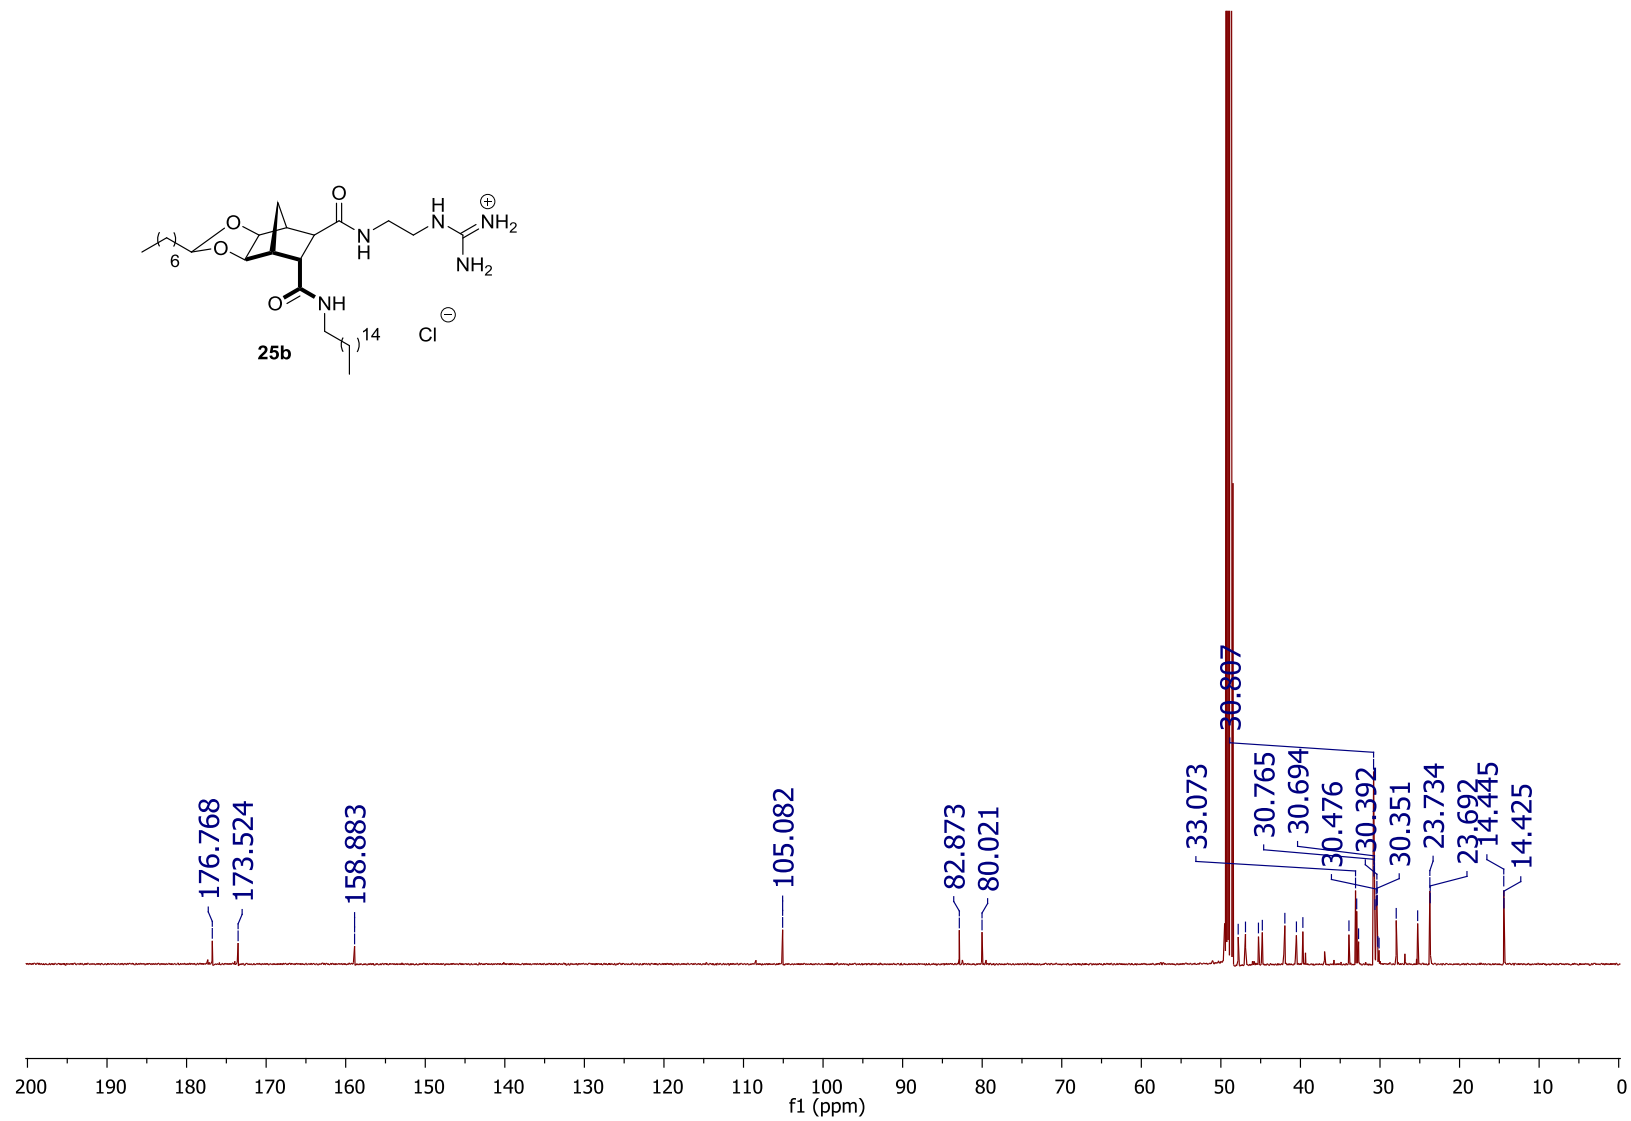

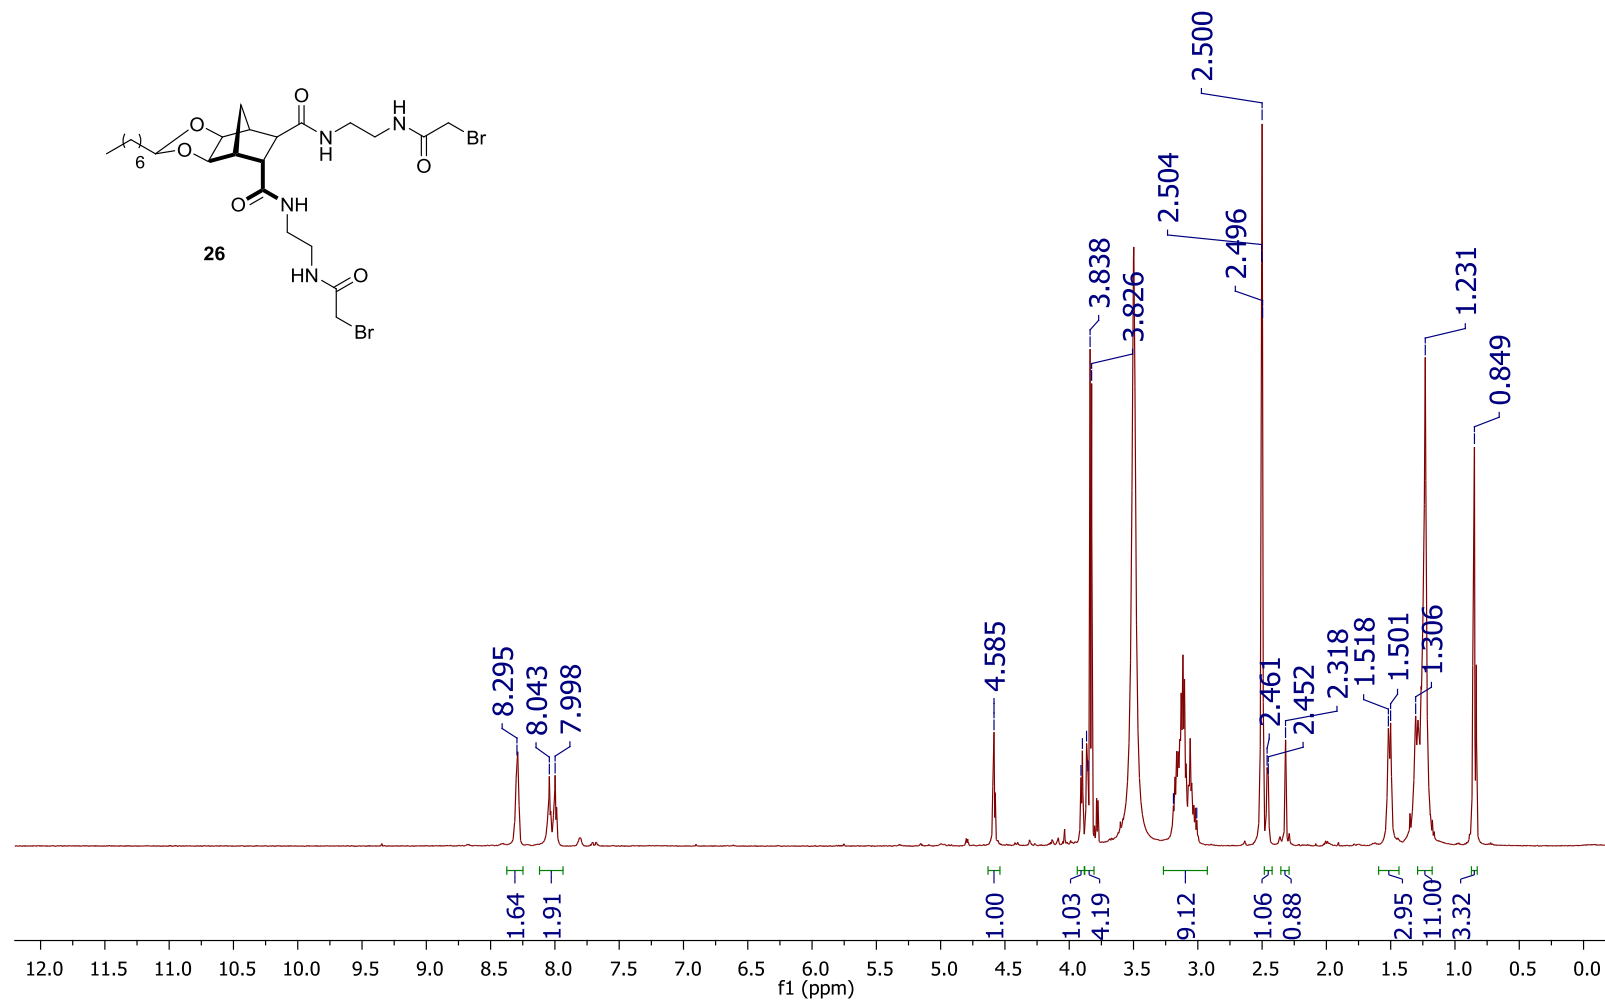

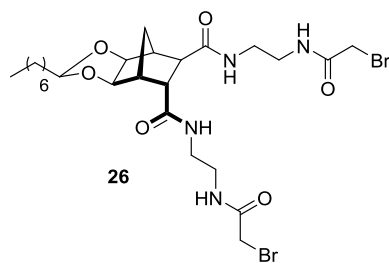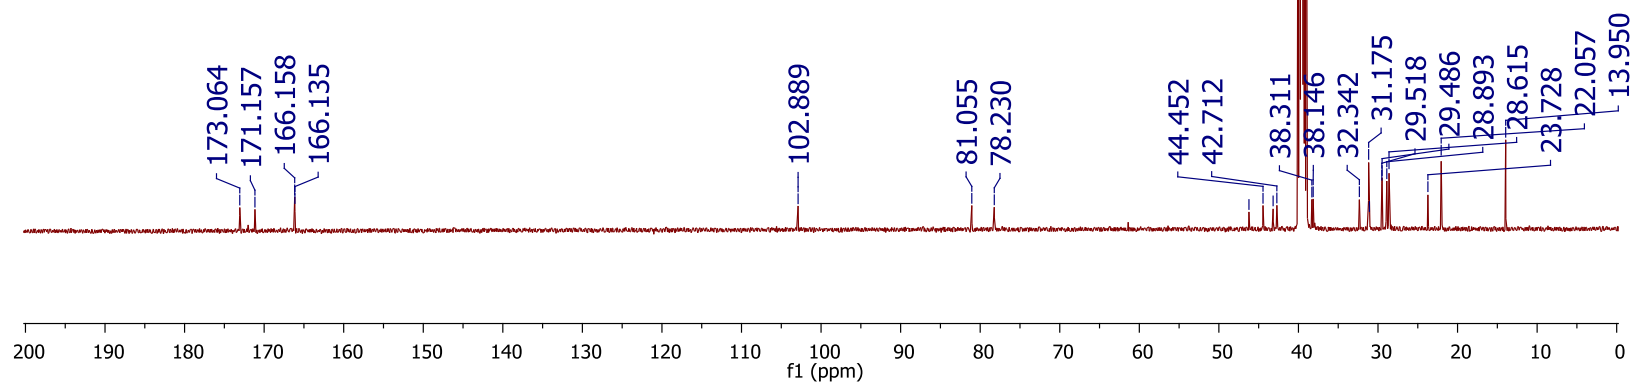

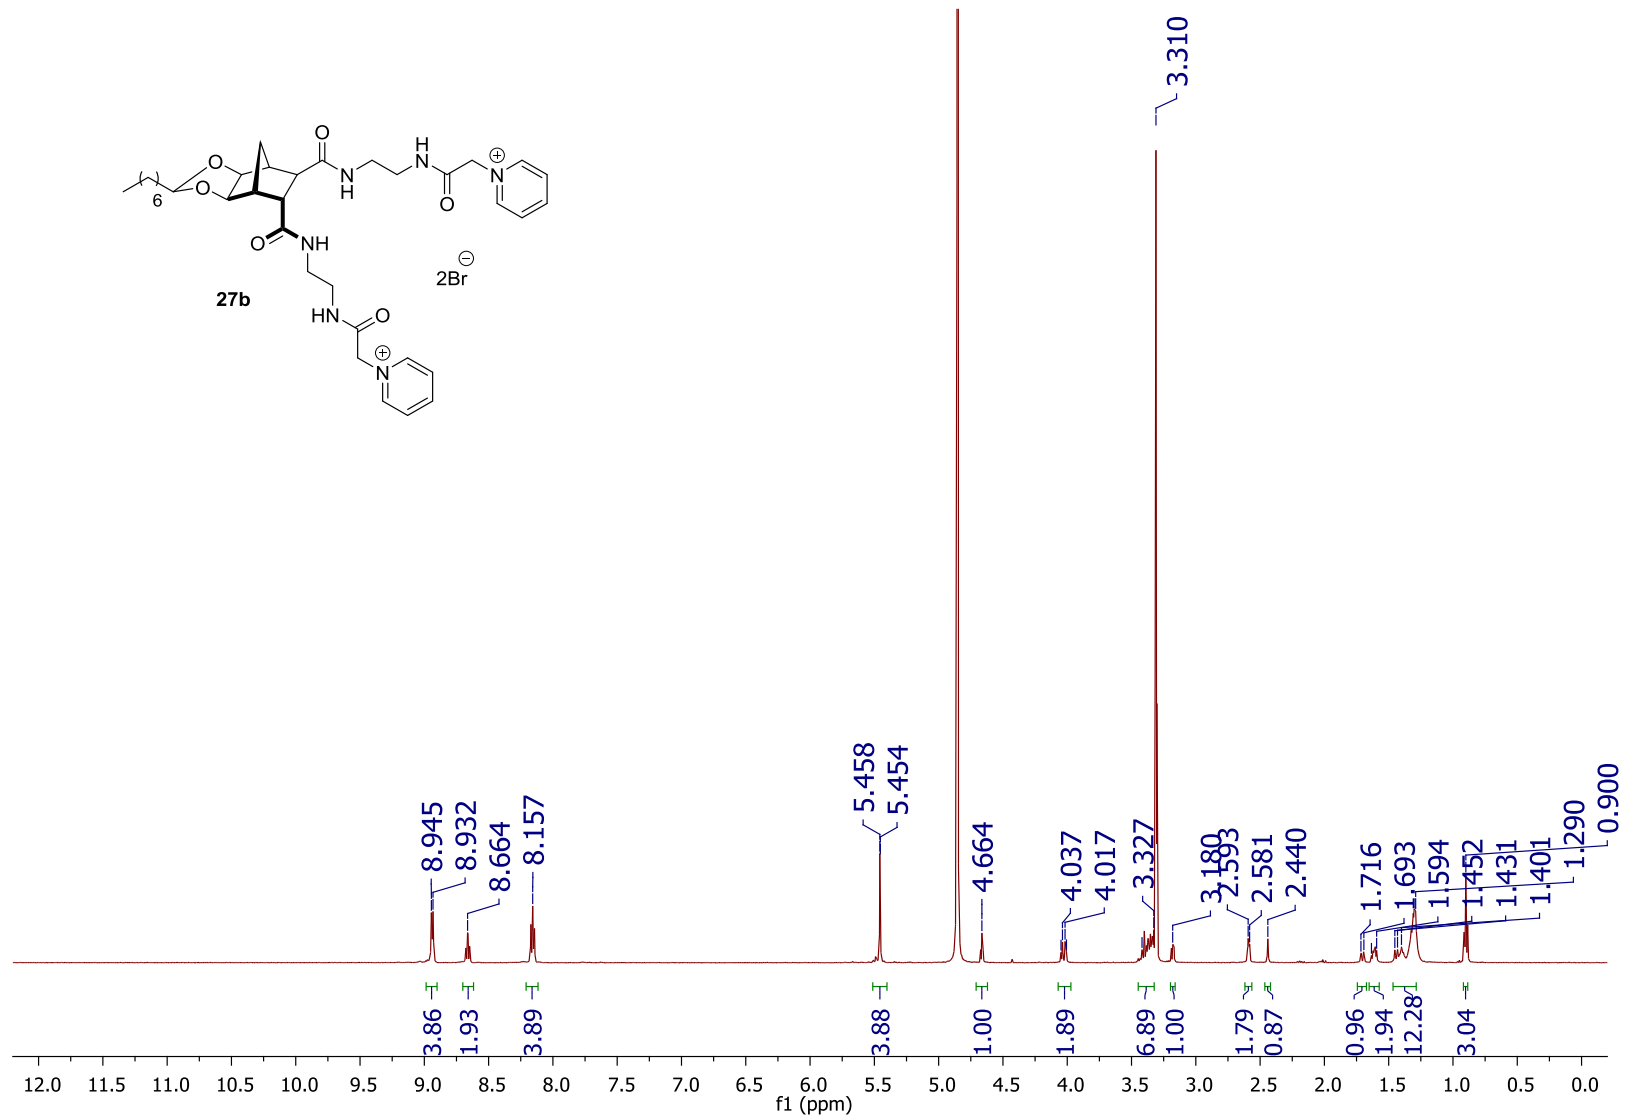

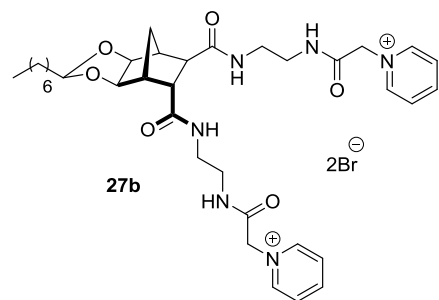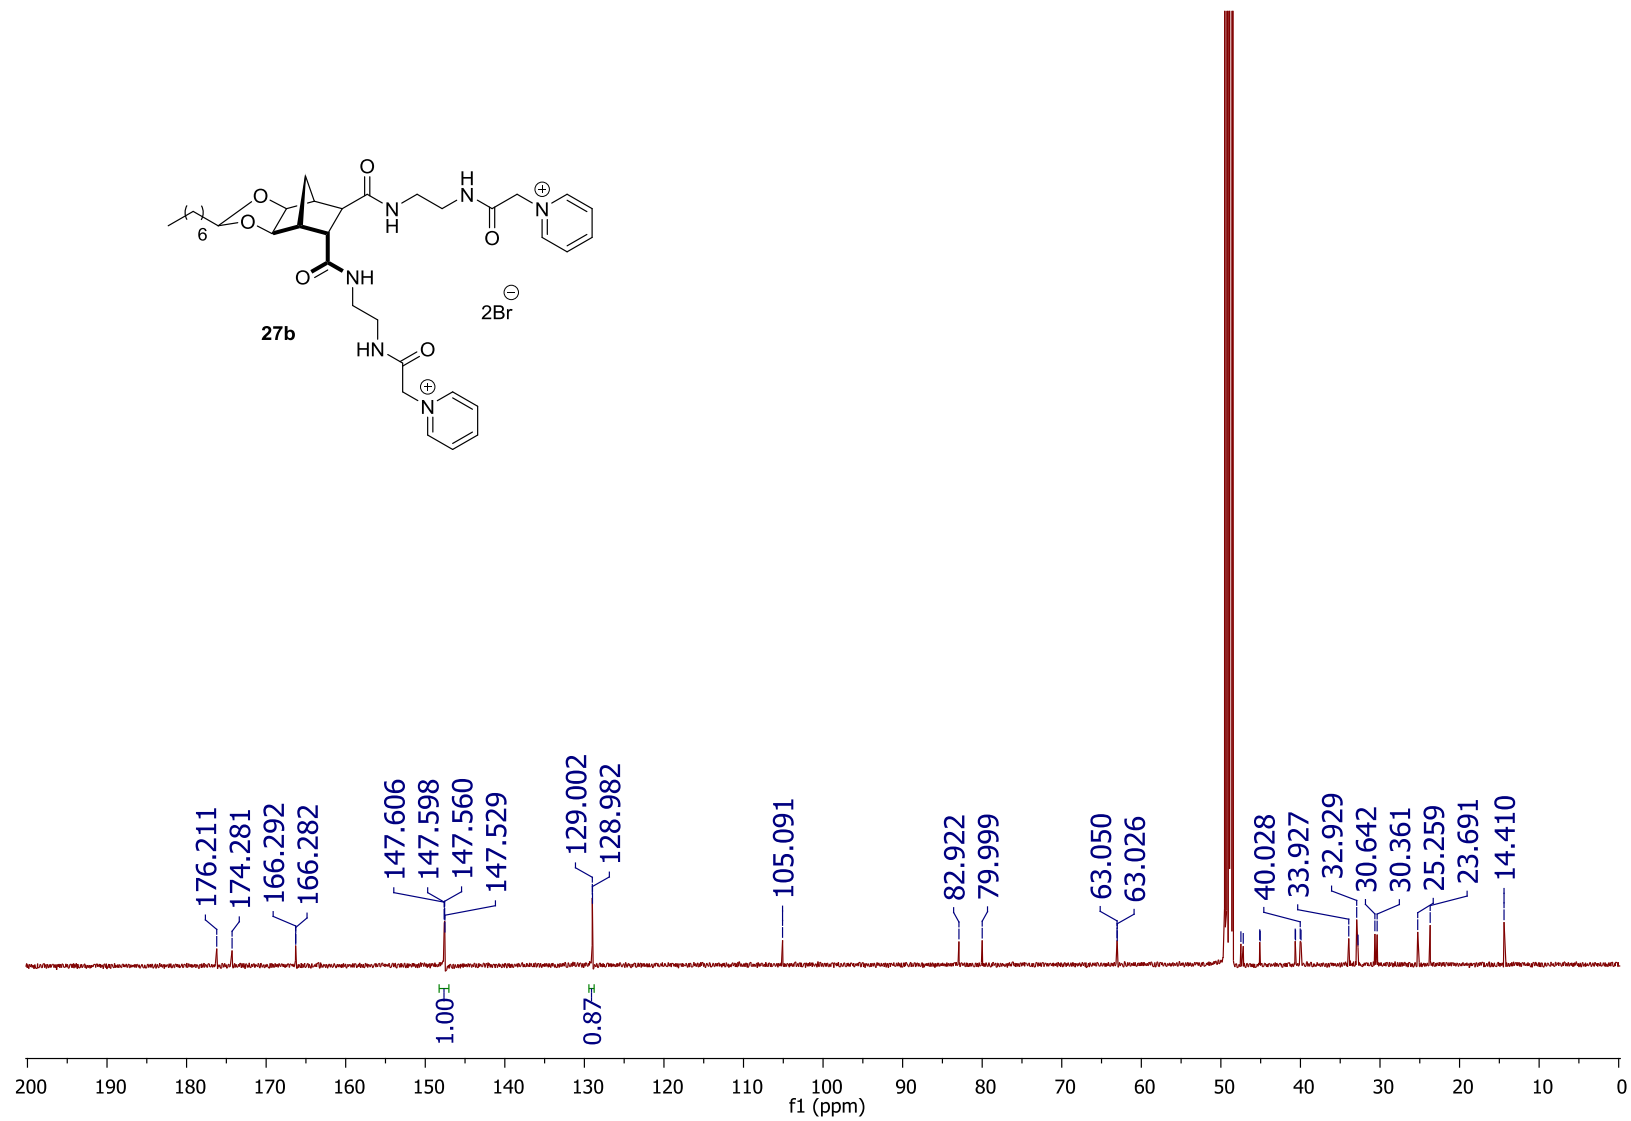

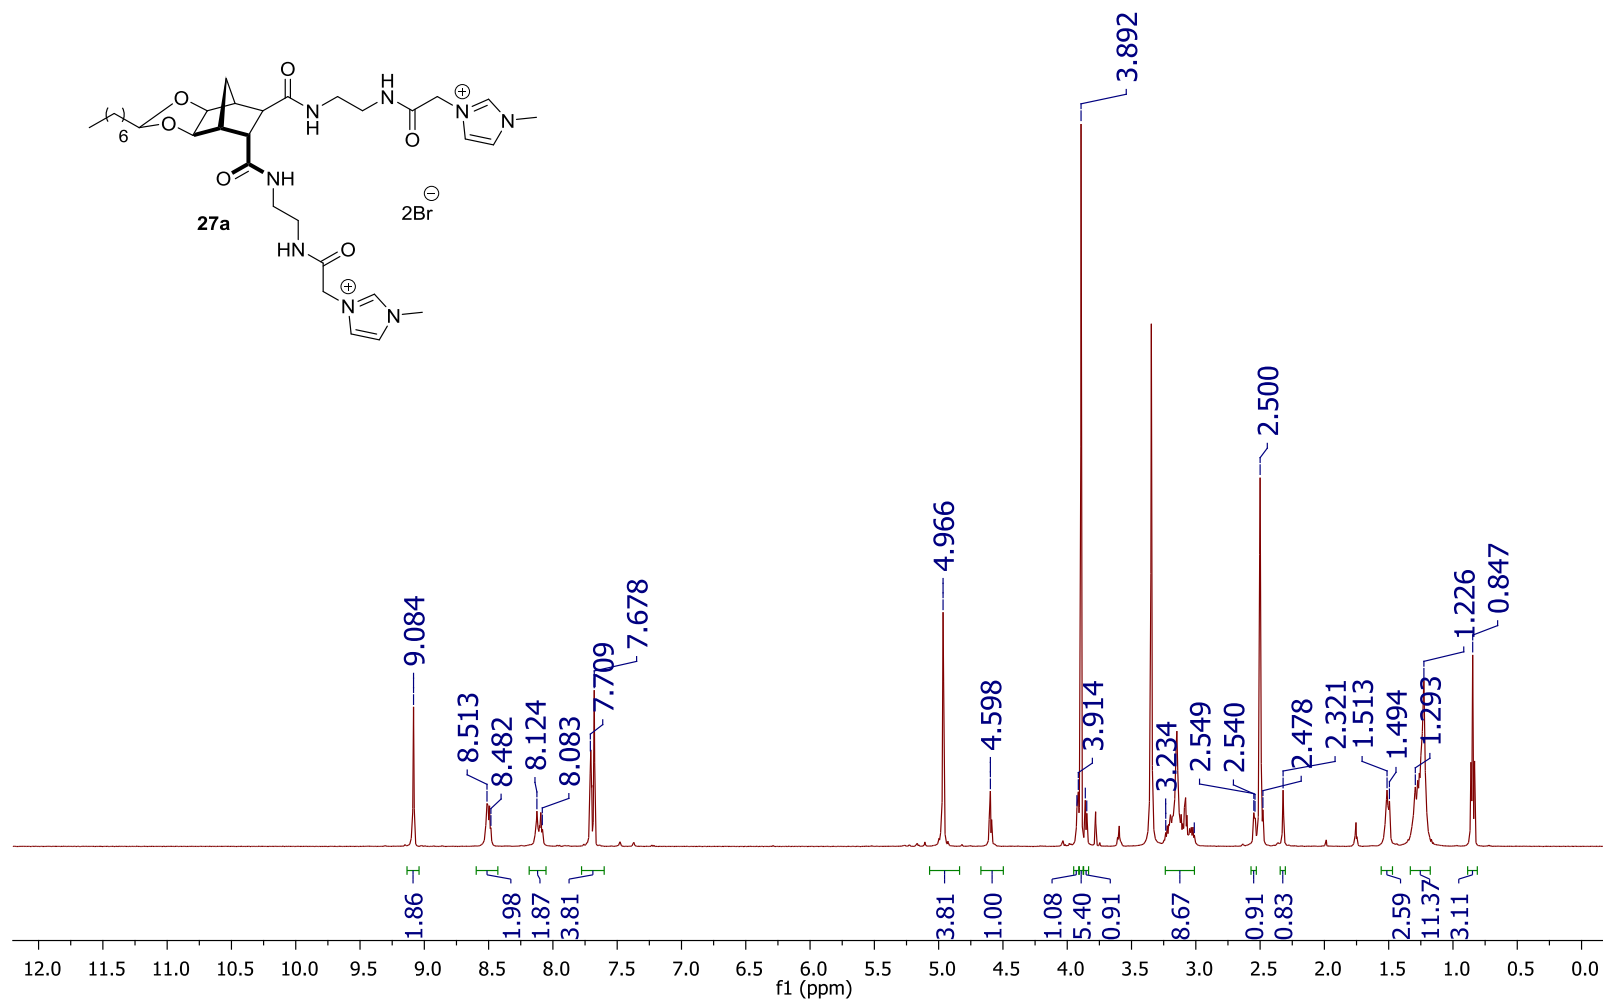

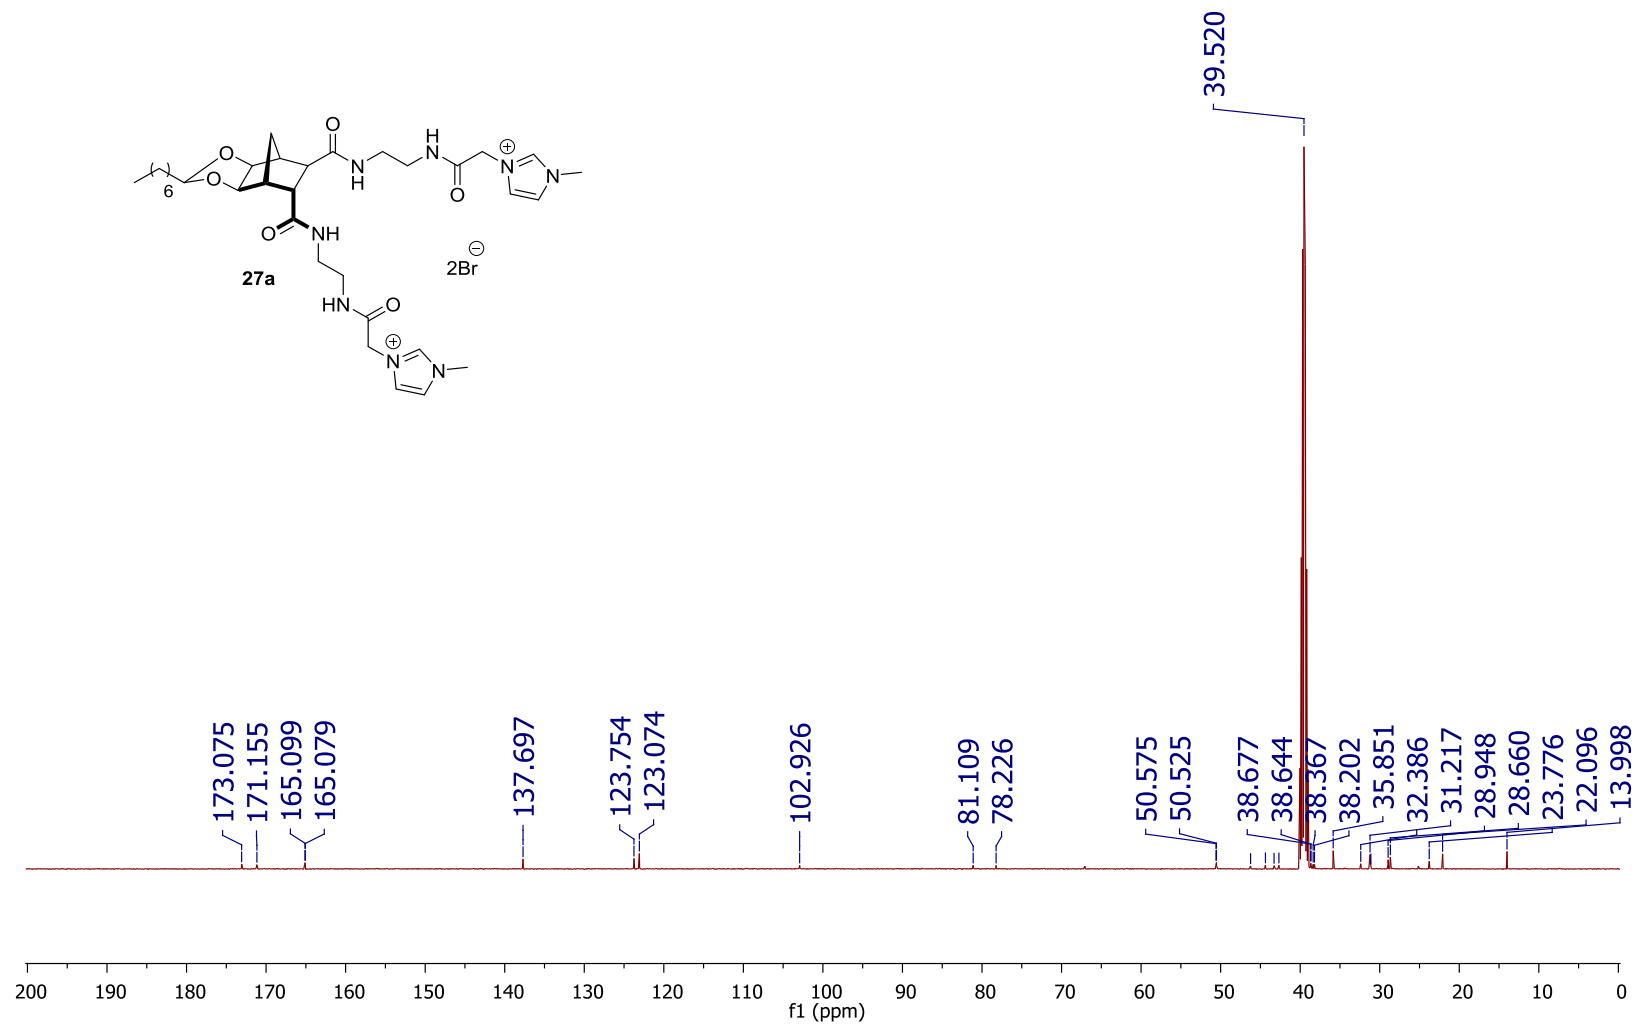

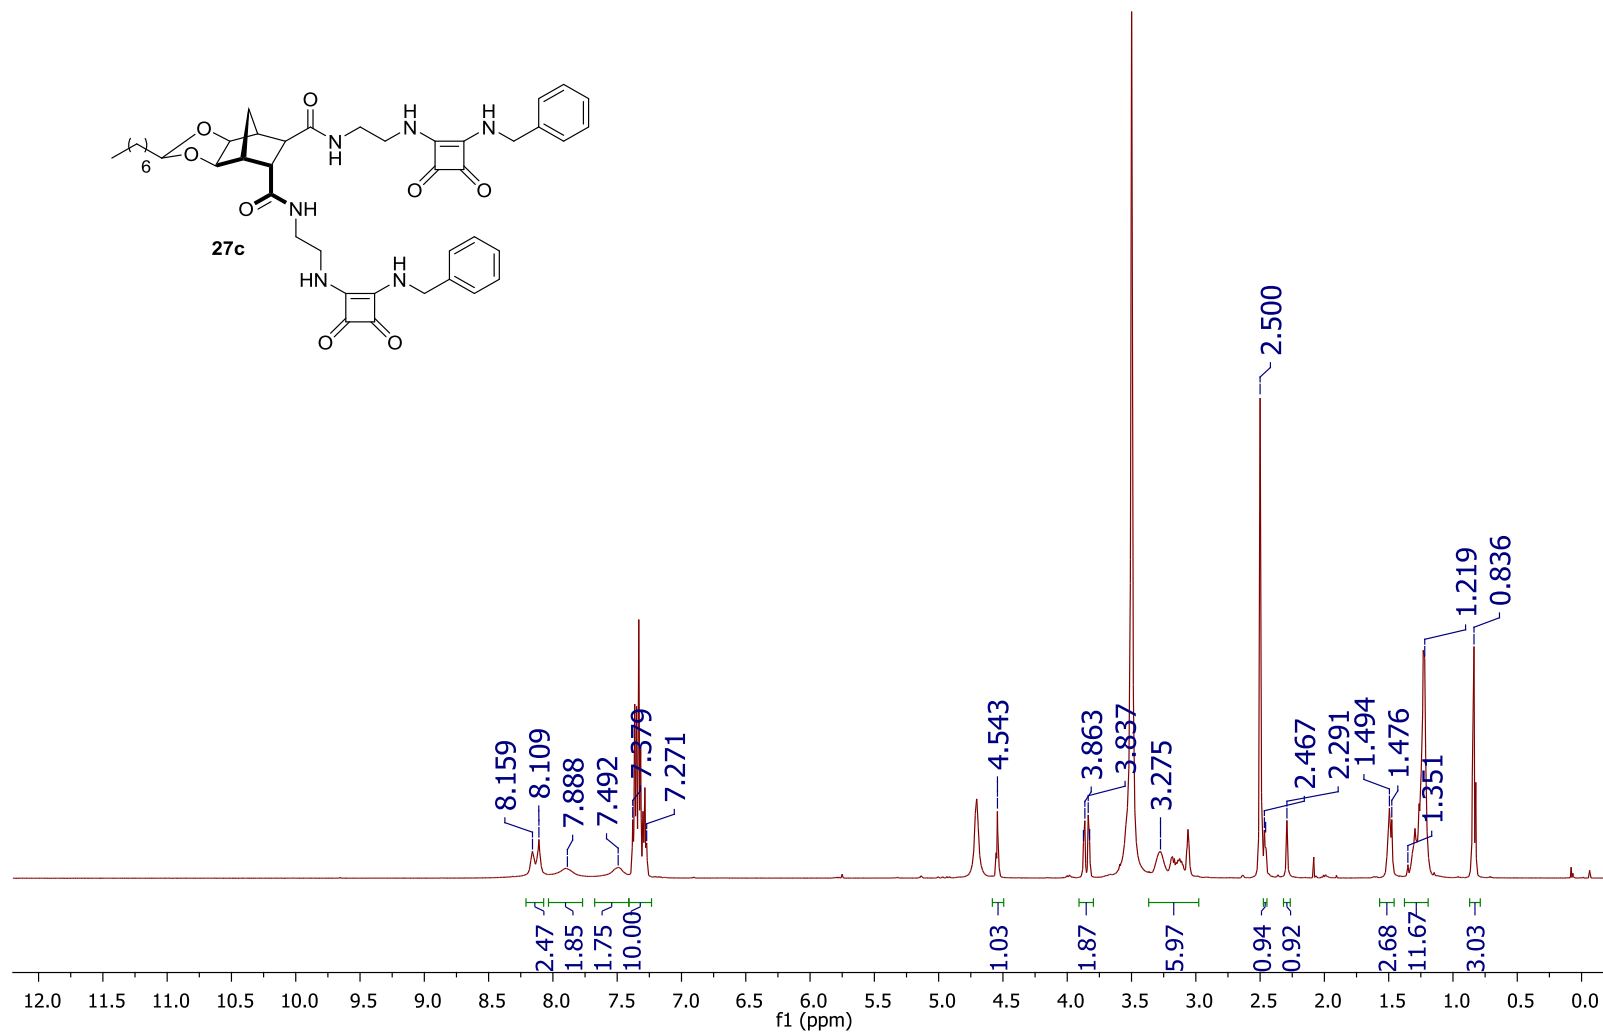

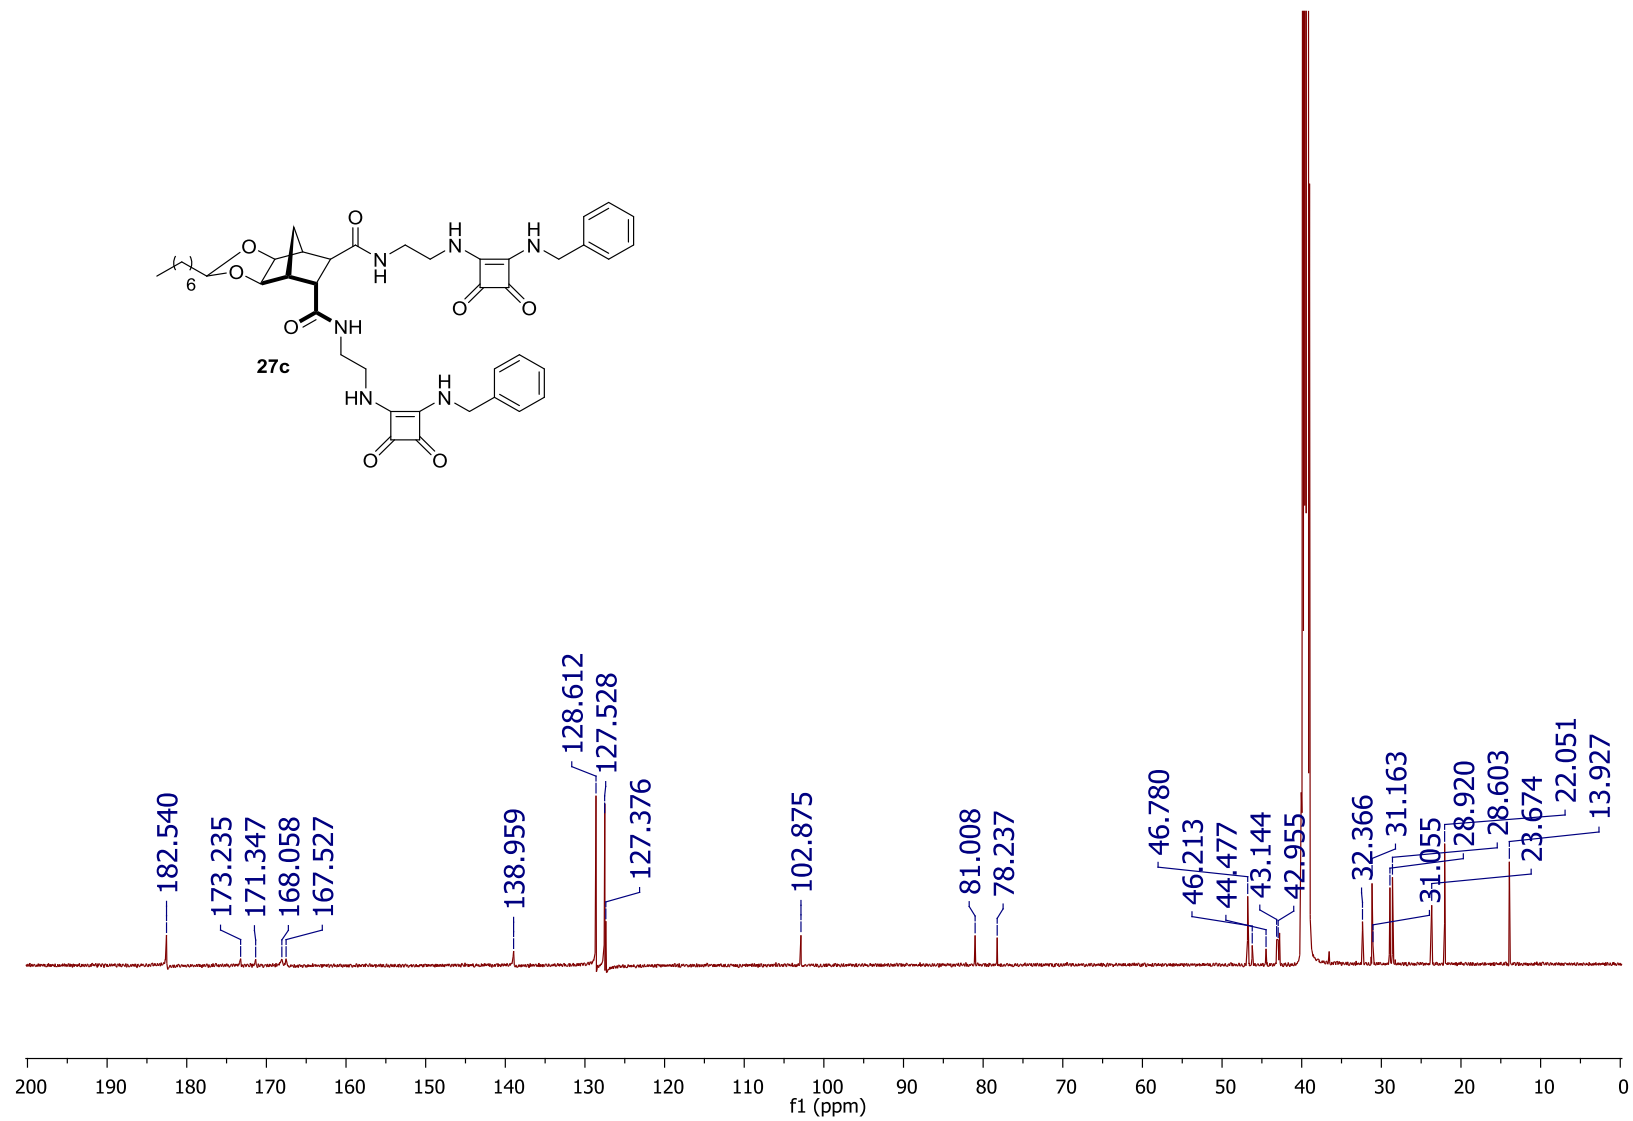

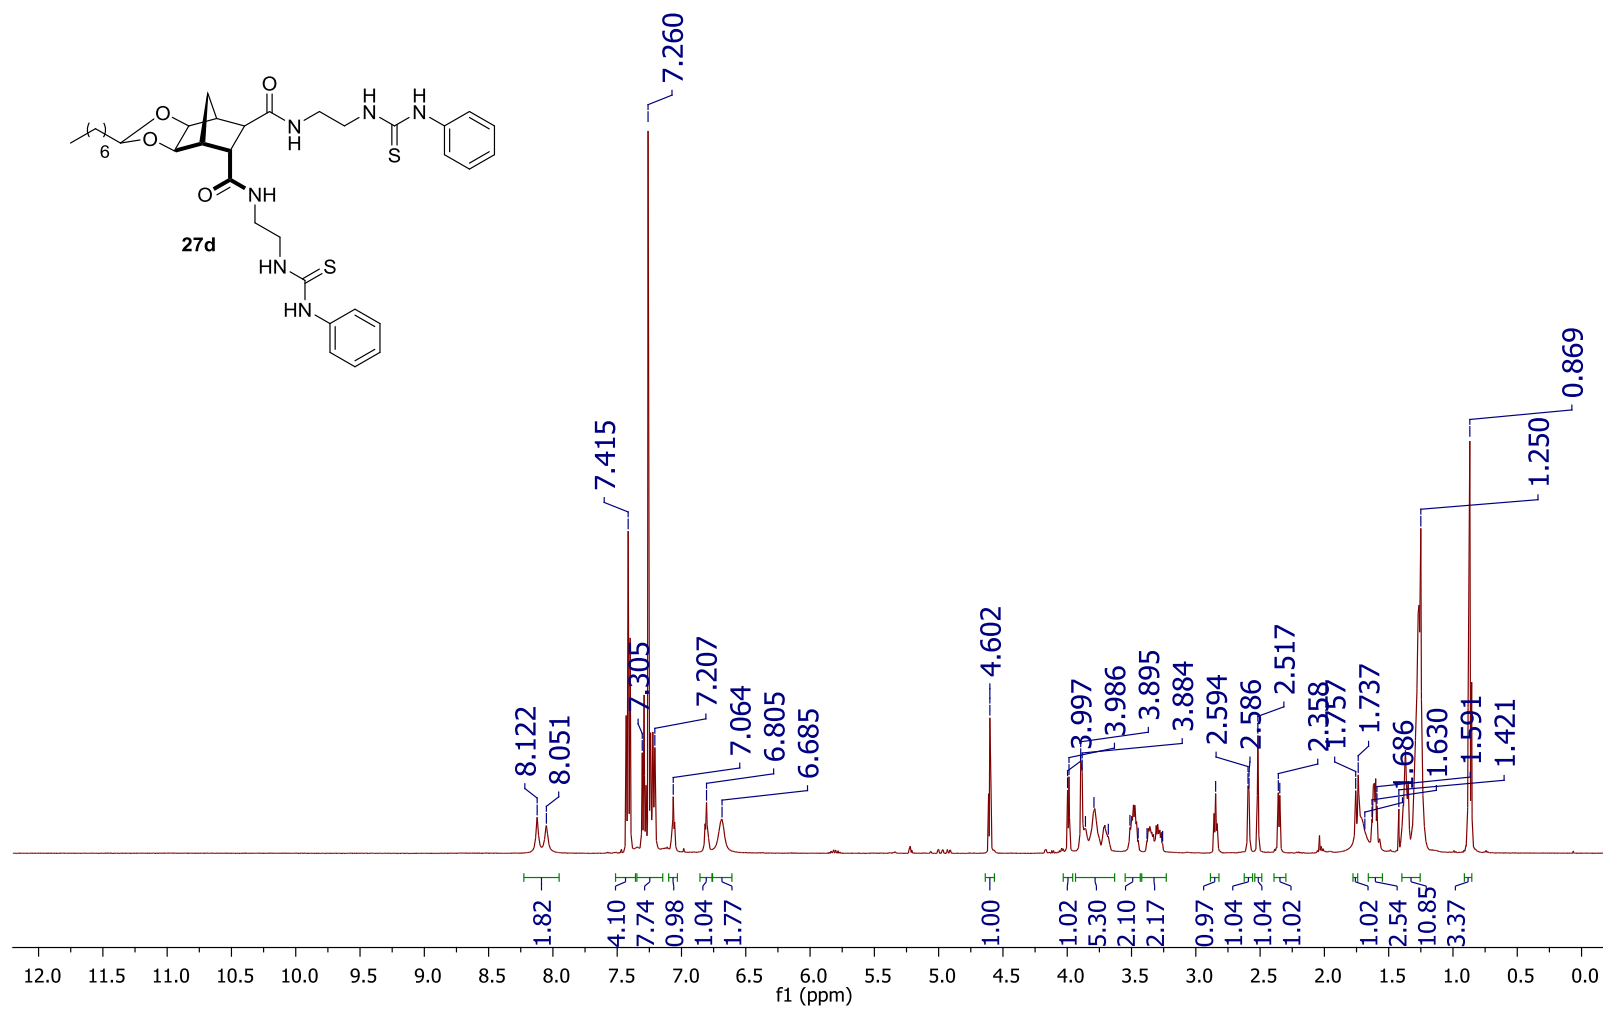

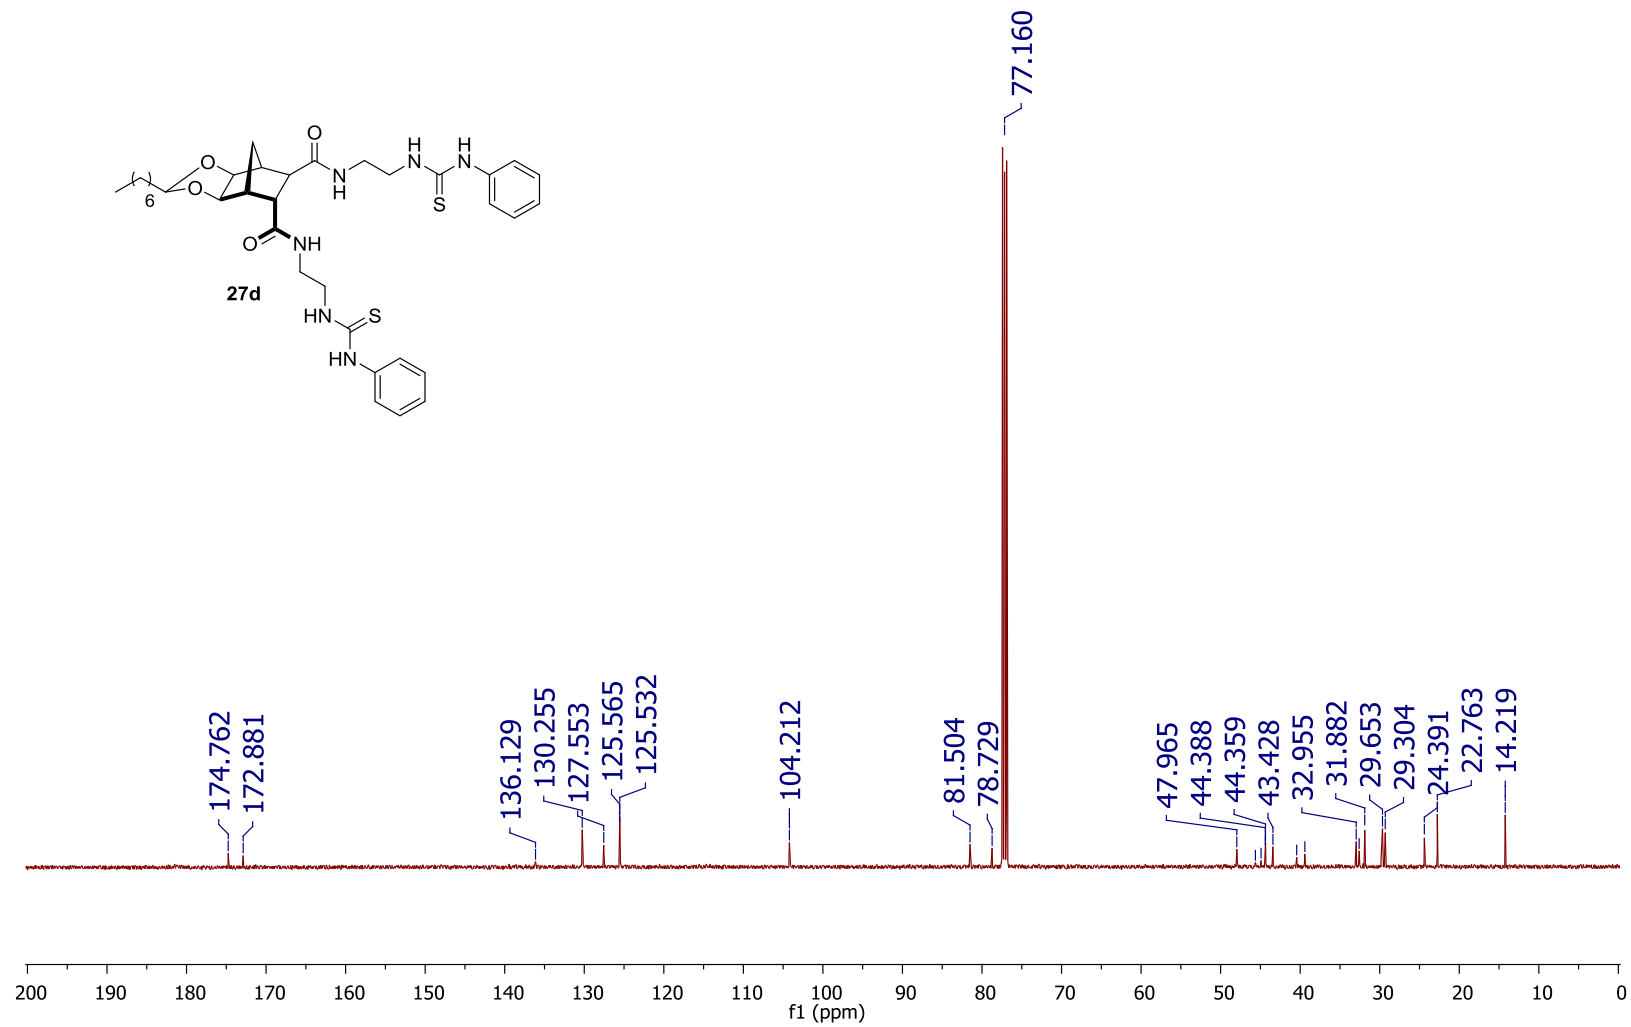

Single Pulse Experiment

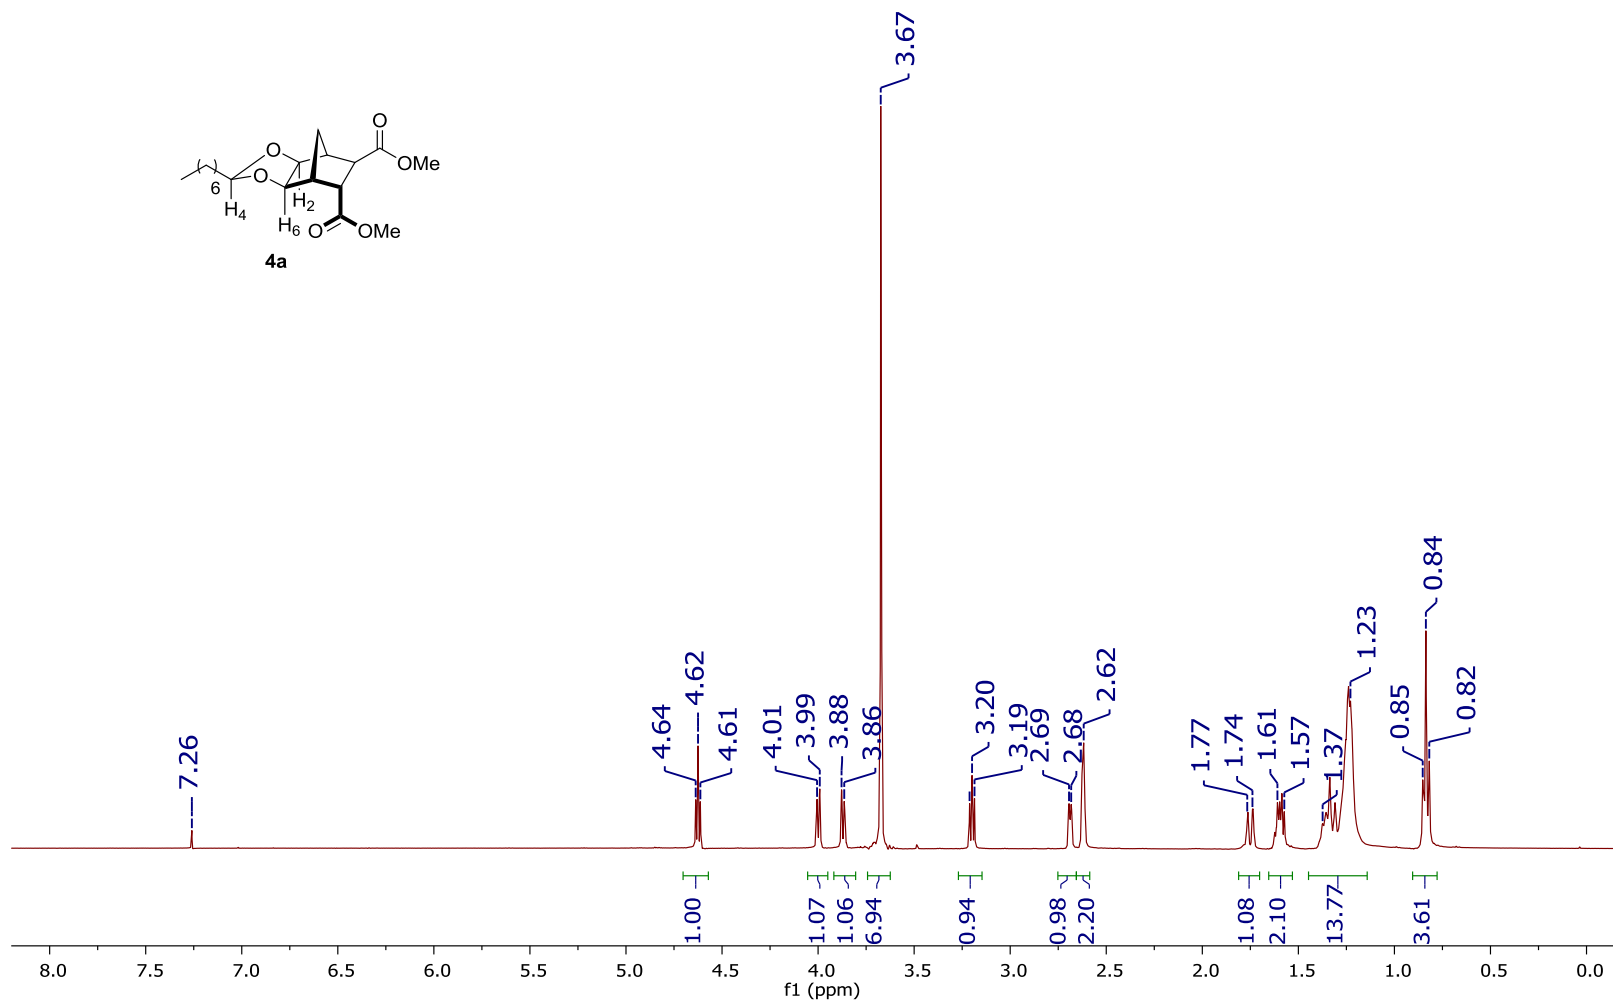

Figure S1:  $^1\text{H}$  NMR spectra of acetal **4a**

Difference NOE Experiment

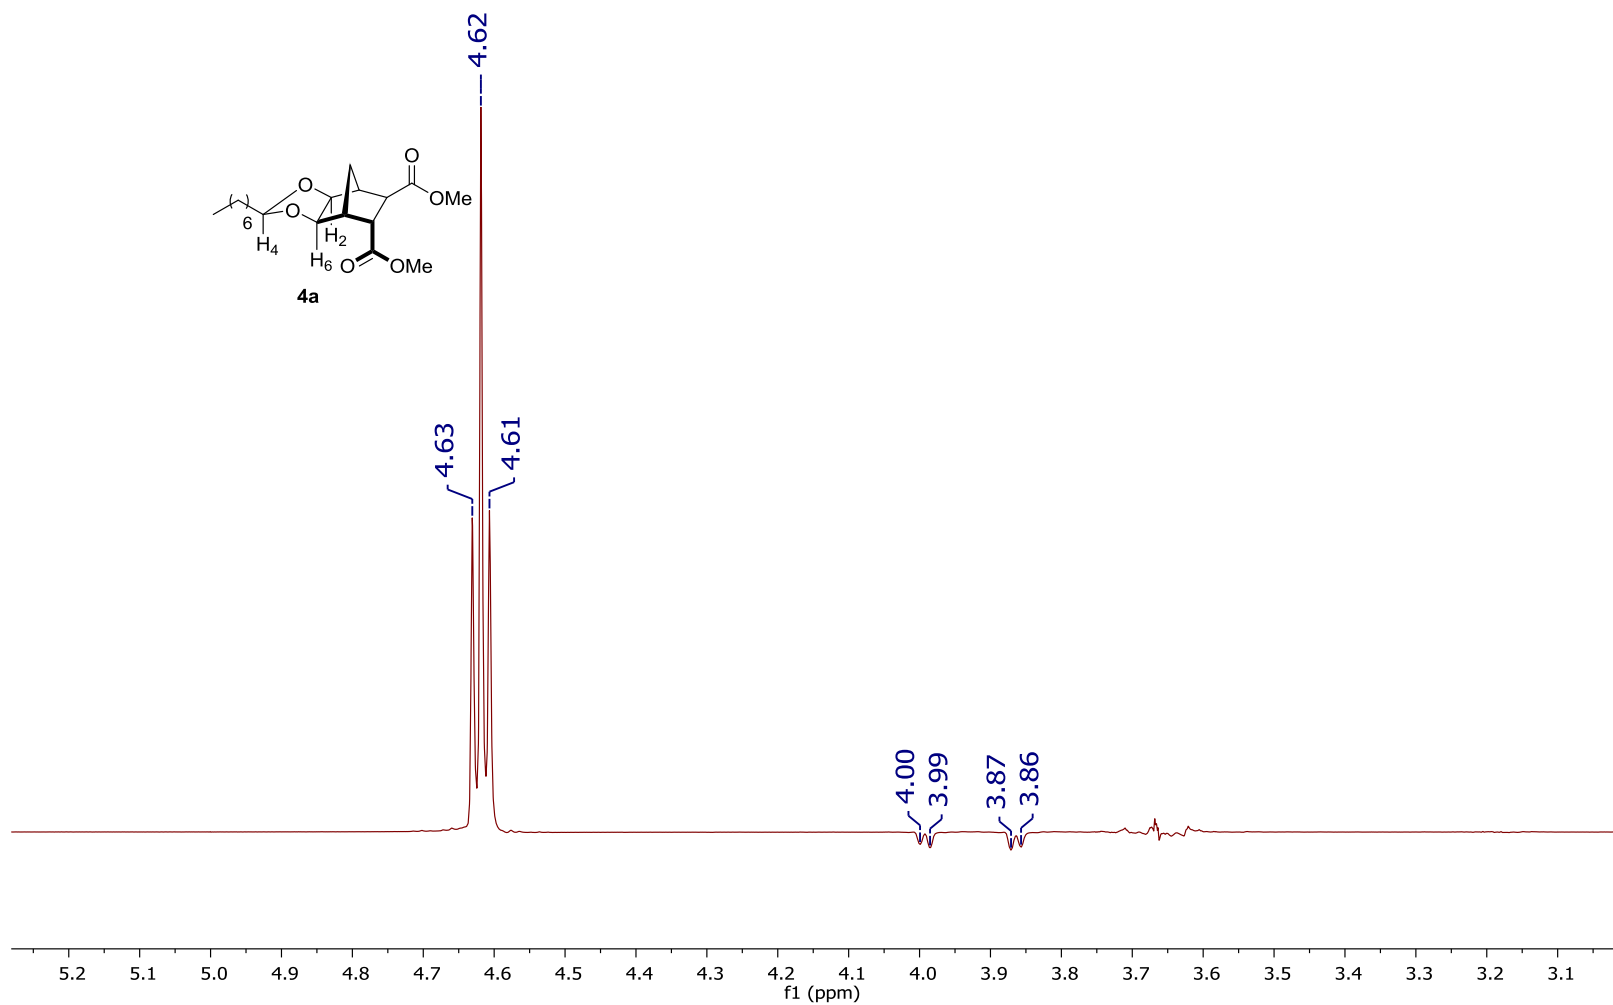

**Figure S2:** 1D Difference NOE spectra of acetal **4a** where proton H4 ( $\delta = 4.62$  ppm) has been irradiated.

SMH07-059C  
 SMH07-059C - 1H  
 PROTON CDCl3 {C:\Data\_500\Shane} nmr 3

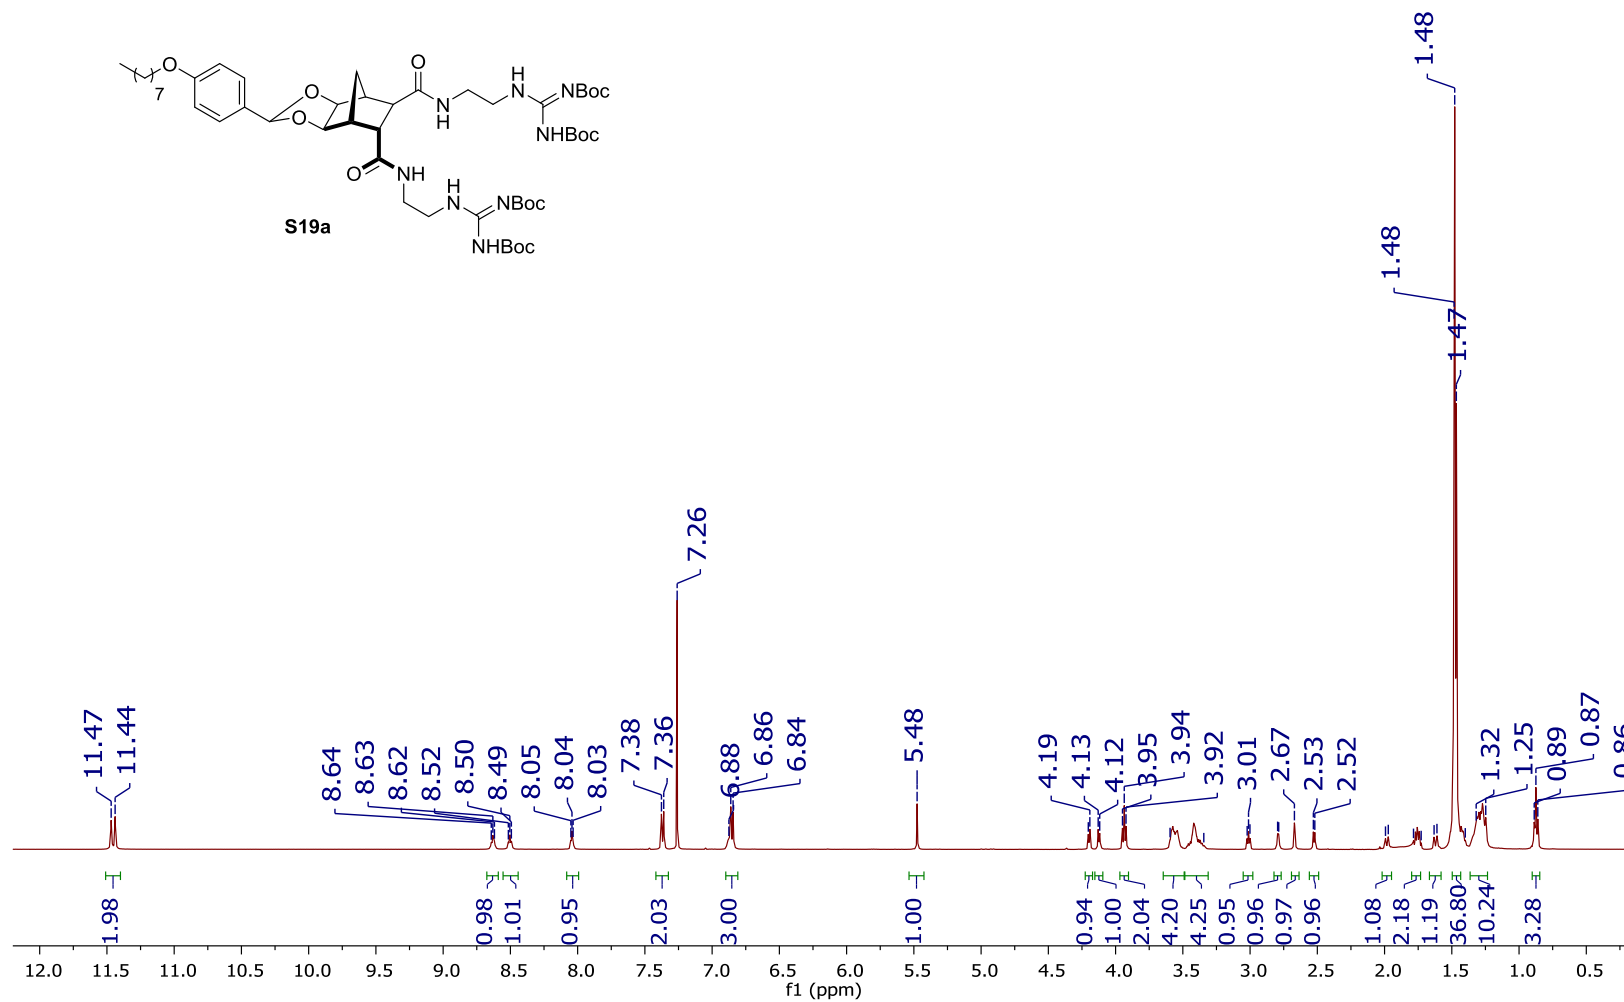

Figure S3: <sup>1</sup>H NMR spectra of S19a

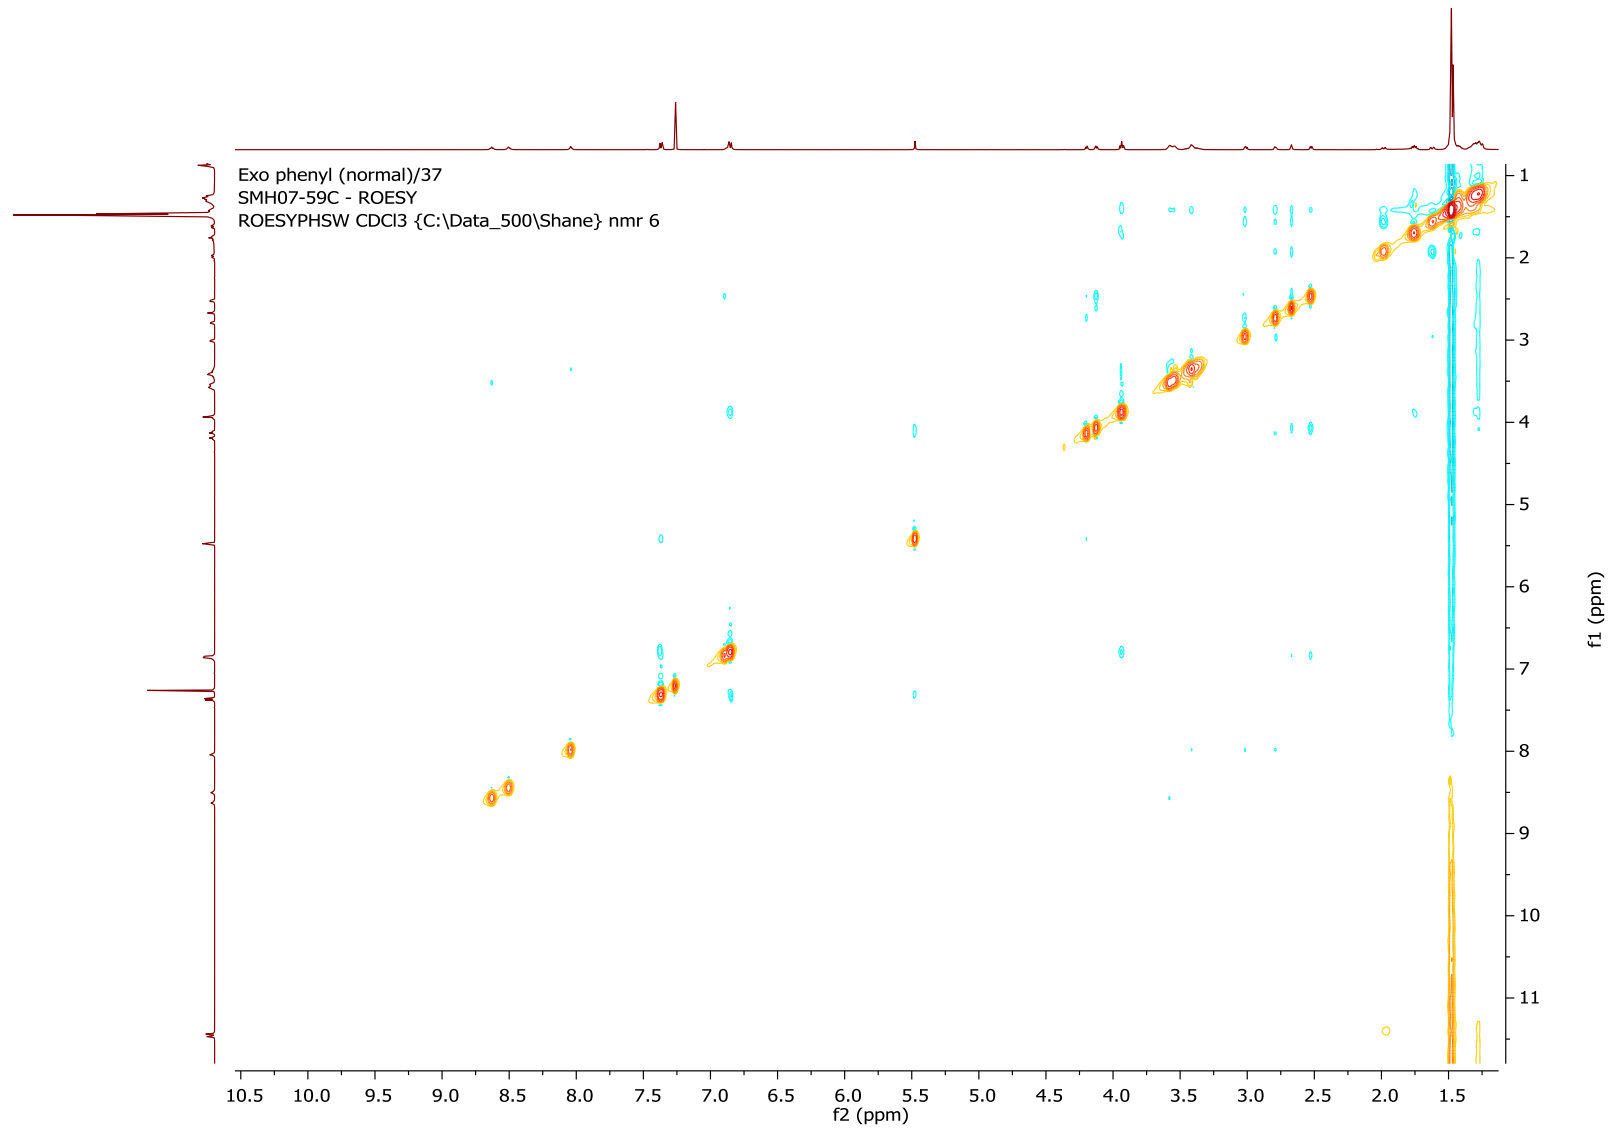

**Figure S4:** ROESY spectra of **S19a** (1.5–10.5 ppm)

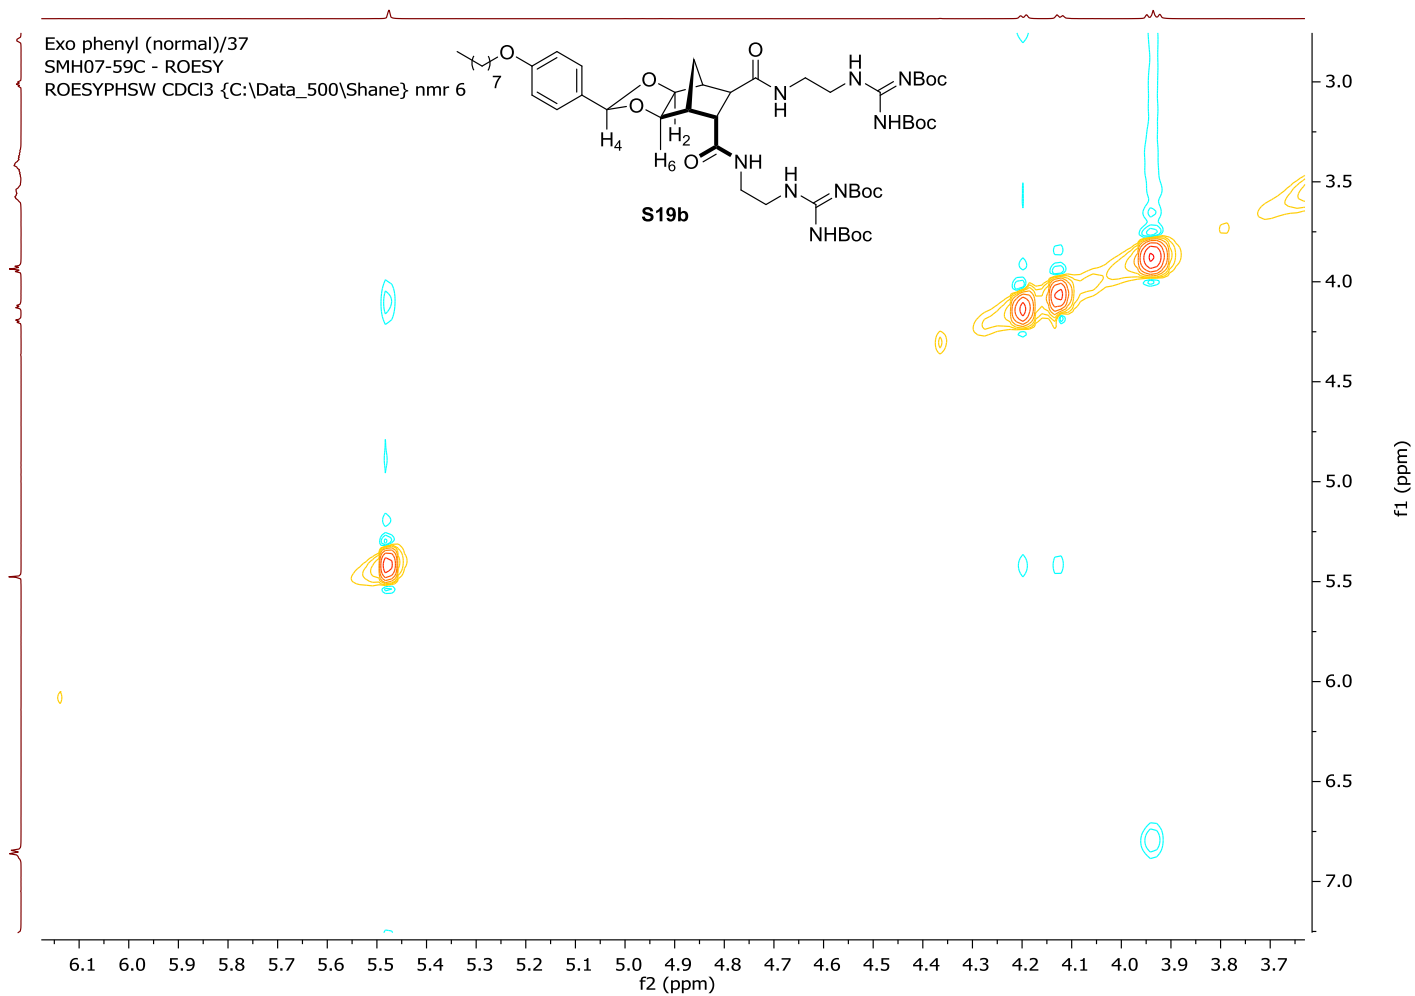

**Figure S5:** ROESY spectra of **S19b** (3.7–6.1 ppm)

Single Pulse Experiment

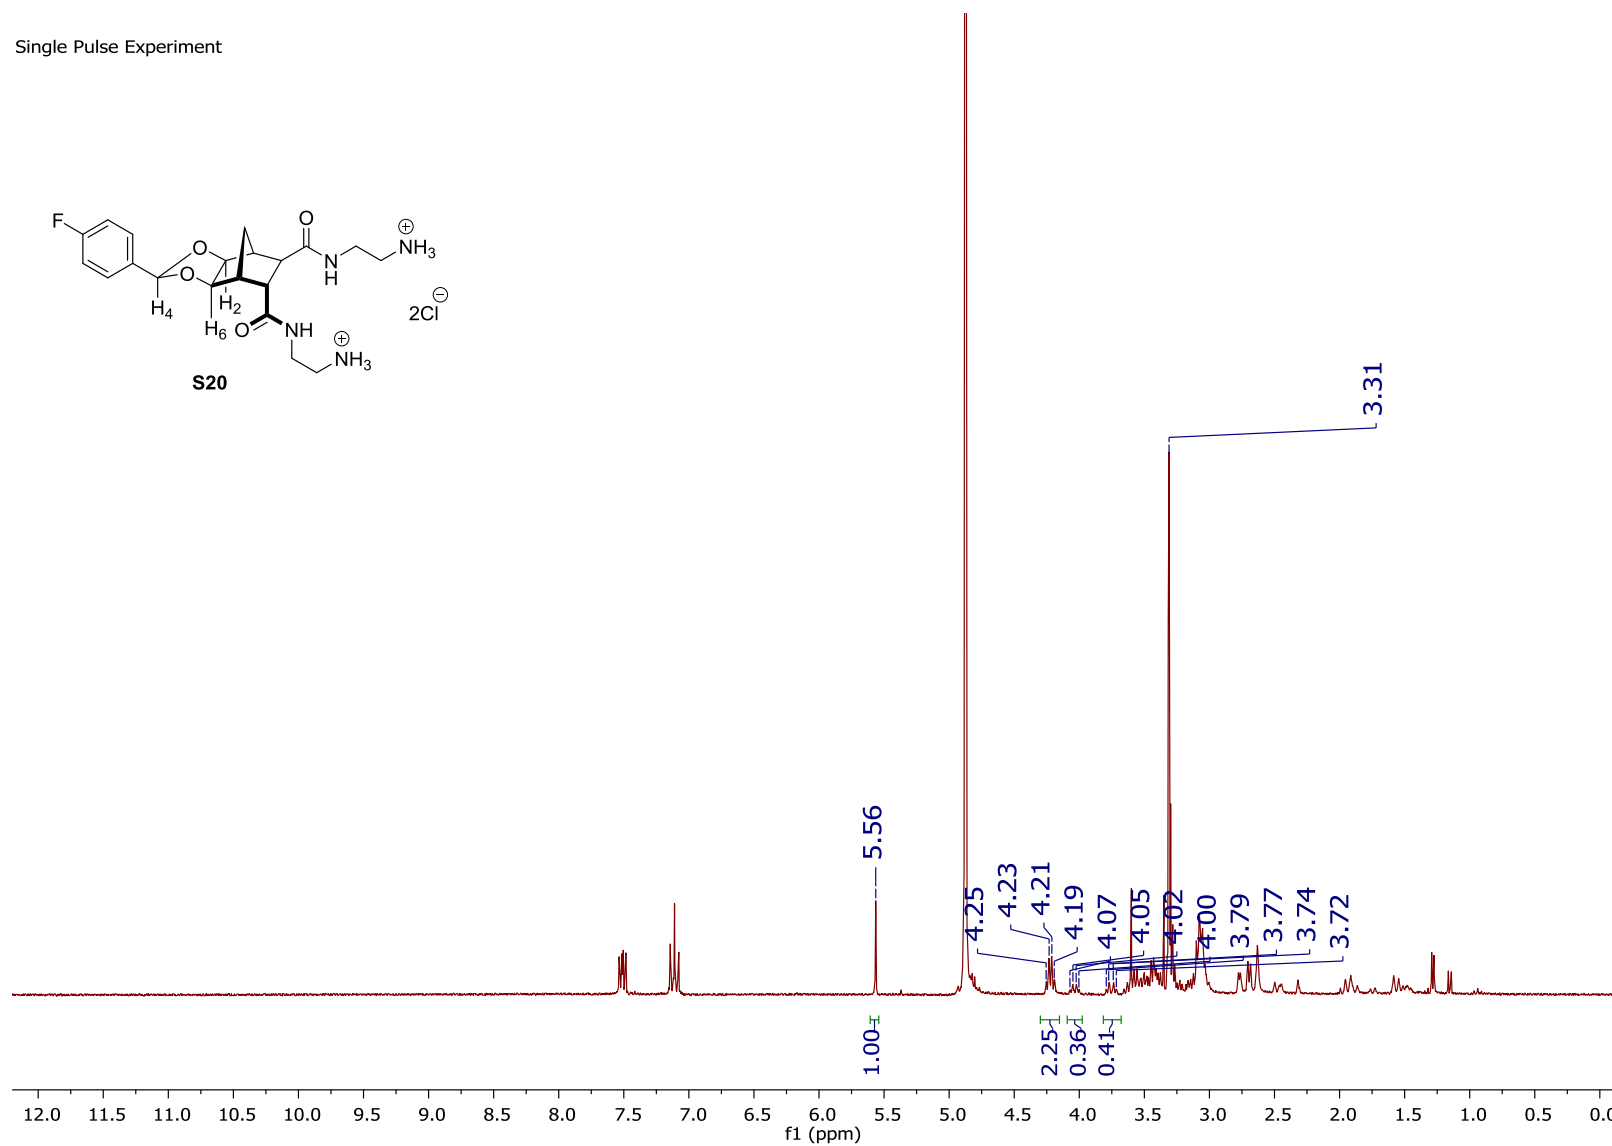

**Figure S6:** <sup>1</sup>H NMR spectra of **S20** (0–12.0 ppm) in CD<sub>3</sub>OD, highlighting the relative integrations of the H<sub>4</sub> proton to the H<sub>2</sub> and H<sub>6</sub> protons of the desired product and unwanted side products

Single Pulse Experiment

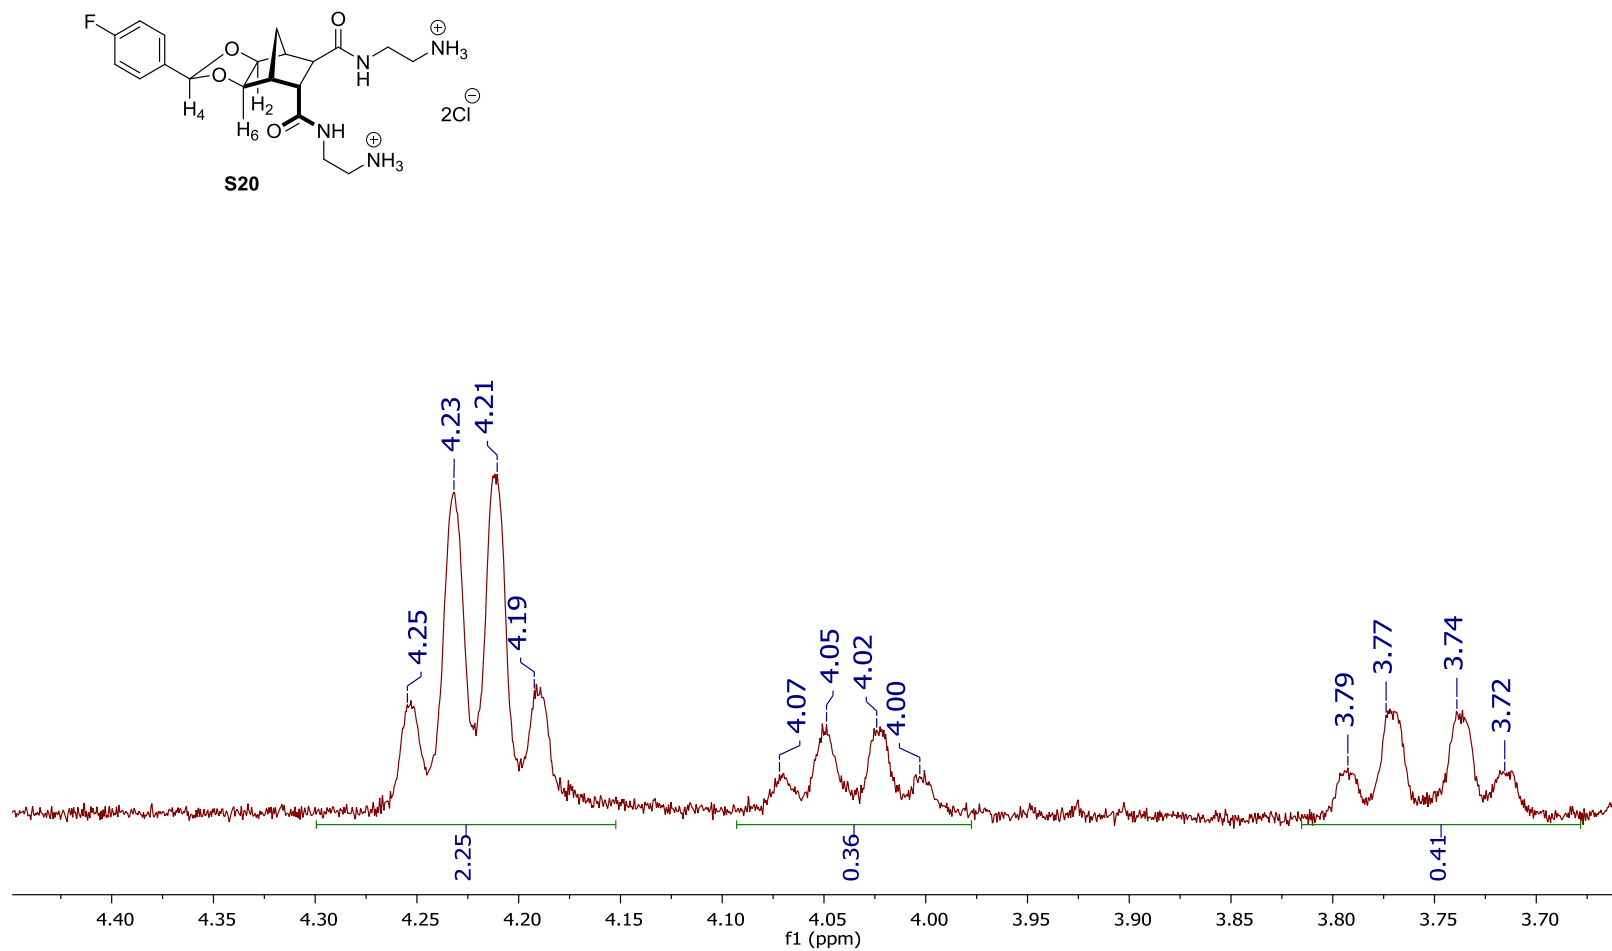

**Figure S7:** <sup>1</sup>H NMR spectra of **S20** (3.7–4.4 ppm) in CD<sub>3</sub>OD highlighting the H<sub>2</sub> and H<sub>6</sub> protons of the desired product and unwanted side products



Intensity data were collected with an Oxford Diffraction SuperNova CCD diffractometer using Mo-K $\alpha$  radiation, the temperature during data collection was maintained at 130.0(1) using an Oxford Cryosystems cooling device. The structure was solved by direct methods and difference Fourier synthesis.<sup>24</sup> Thermal ellipsoid plots were generated using the program ORTEP-3<sup>25</sup> integrated within the WINGX suite of programs.<sup>26</sup>

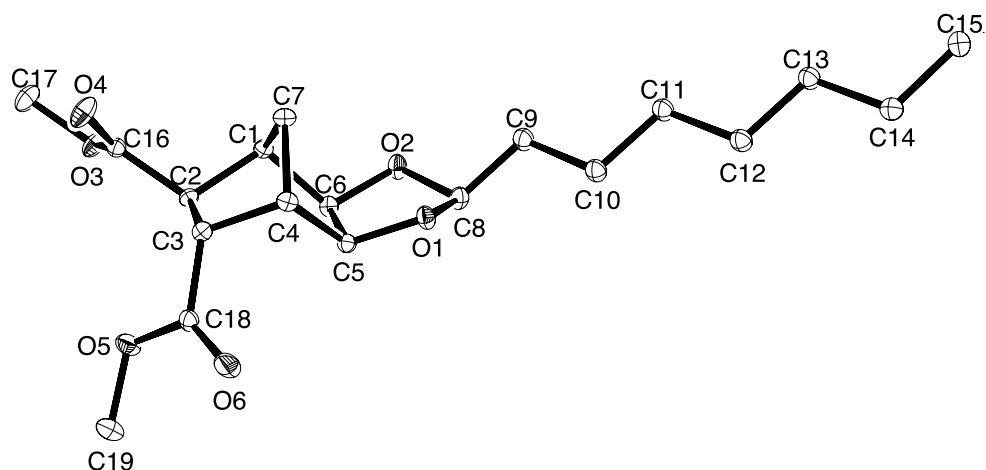

**Figure S8.** Thermal ellipsoid plot of **4a** Ellipsoids are at the 30% probability level

Crystal data for **4a**. C<sub>19</sub>H<sub>30</sub>O<sub>6</sub>,  $M = 354.43$ ,  $T = 130.0$  K,  $\lambda = 0.7107$ , 554.22, space group P -1,  $a = 5.6122(2)$ ,  $b = 9.9184(5)$ ,  $c = 17.5824(10)$  Å,  $\alpha = 102.312(5)$ ,  $\beta = 94.807(4)^\circ$ ,  $\gamma = 102.041(4)^\circ$ ,  $V = 926.69(8)$  Å<sup>3</sup>,  $Z = 2$ ,  $D_c = 1.270$  Mg M<sup>-3</sup>  $\mu(\text{Mo-K}\alpha) 0.093$  mm<sup>-1</sup>,  $F(000) = 384$ , crystal size 0.59 x 0.54 x 0.23 mm<sup>3</sup>, 7072 reflections measured, 4297 independent reflections [ $R(\text{int}) = 0.0188$ ], the final  $R$  was 0.0448 [ $I > 2\sigma(I)$  3512 data] and  $wR(F^2)$  was 0.1112 (all data).

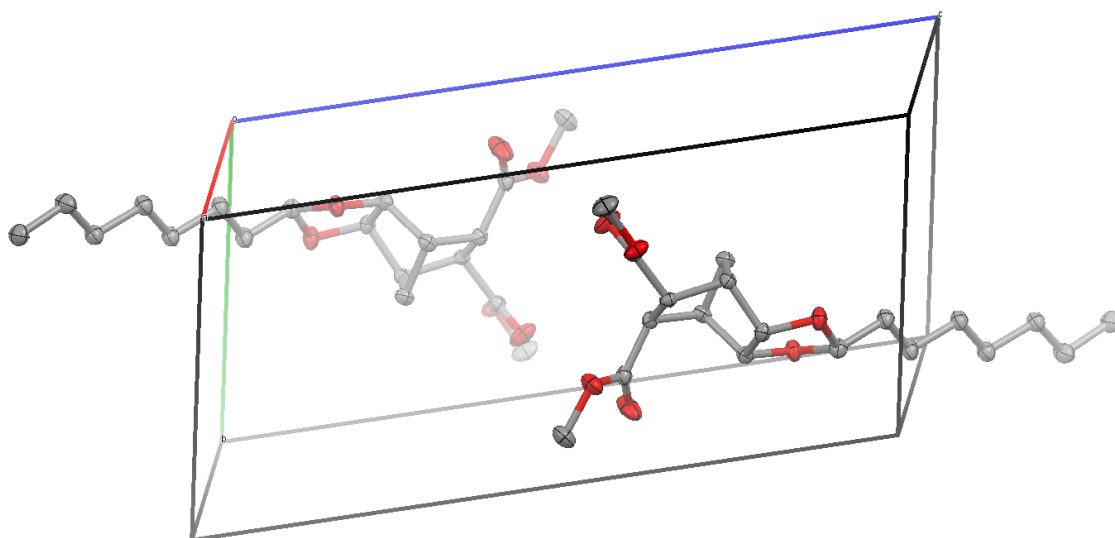

**Figure S9.** Unit cell structure of **4a** highlighting the amphiphilic packing.

**Table S1:** Bacterial strains used for Minimum Inhibitory Concentration (MIC) and disk diffusion (DD) assay

| Organism                        | Strain                                 | Strain description                                              | Assay  |
|---------------------------------|----------------------------------------|-----------------------------------------------------------------|--------|
| <i>Escherichia coli</i>         | ATCC 25922                             | FDA strain Seattle 1946                                         | MIC    |
| <i>Klebsiella pneumoniae</i>    | ATCC 13883                             | Control strain                                                  | DD     |
| <i>Klebsiella pneumoniae</i>    | ATCC 700603                            | MDR (Multi-drug resistant)                                      | MIC    |
| <i>Acinetobacter baumannii</i>  | ATCC 19606                             | Type strain                                                     | MIC/DD |
| <i>Pseudomonas aeruginosa</i>   | ATCC 27853                             | Type strain                                                     | MIC/DD |
| <i>Staphylococcus aureus</i>    | ATCC 43300                             | MRSA (methicillin resistant <i>S. aureus</i> )                  | MIC/DD |
| <i>Enterococcus faecium</i>     | ATCC 700221                            | VRE (vancomycin resistant <i>Enterococcus</i> )                 | DD     |
| <i>Staphylococcus aureus</i>    | Clinical isolate from UQCCR collection | mMRSA (multi-resistant methicillin resistant <i>S. aureus</i> ) | MIC    |
| <i>Staphylococcus aureus</i>    | NARSA-NRS 17                           | GISA (glycopeptide-intermediate <i>S. aureus</i> )              | MIC    |
| <i>Staphylococcus aureus</i>    | NARSA-NRS 1                            | VISA (vancomycin-intermediate <i>S. aureus</i> )                | MIC    |
| <i>Streptococcus pneumoniae</i> | ATCC 700677                            | MDR (Multi-drug resistant)                                      | MIC    |
| <i>Enterococcus faecalis</i>    | Clinical isolate from UQCCR collection | VanA (vancomycin resistant)                                     | MIC    |

## References

1. H. E. Gottlieb, V. Kotlyar and A. Nudelman, *J. Org. Chem.*, 1997, **62**, 7512-7515.
2. G. P. Moss, *Pure Appl. Chem.*, 1999, **71**, 513-529.
3. G. Radau, S. Schermuly and A. Fritsche, *Arch. Pharm.*, 2003, **336**, 300-309.
4. A. Kraus, P. Ghorai, T. Birnkammer, D. Schnell, S. Elz, R. Seifert, S. Dove, G. Bernhardt and A. Buschauer, *ChemMedChem*, 2009, **4**, 232-240.
5. C. Liu, W. Guo, X. Shi, M. A. Kaium, X. Gu and Y. Z. Zhu, *Eur. J. Med. Chem*, 2011, **46**, 3996-4009.
6. S. M. Hickey, T. D. Ashton, S. K. Khosa and F. M. Pfeffer, *Synlett*, 2012, **23**, 1779-1782.
7. L. D. Van Vliet, T. Ellis, P. J. Foley, L. Liu, F. M. Pfeffer, R. A. Russell, R. N. Warrenner, F. Hollfelder and M. J. Waring, *J. Med. Chem.*, 2007, **50**, 2326-2340.
8. M. Mohamed, T. P. Gonçalves, R. J. Whitby, H. F. Sneddon and D. C. Harrowven, *Chem. Euro. J.*, 2011, **17**, 13698-13705.
9. N. C. Lim, M. D. Morton, H. A. Jenkins and C. Brückner, *J. Org. Chem.*, 2003, **68**, 9233-9241.
10. L. He, H.-S. Byun and R. Bittman, *J. Org. Chem.*, 2000, **65**, 7618-7626.
11. C.-X. Miao, L.-N. He, J.-L. Wang and F. Wu, *J. Org. Chem.*, 2009, **75**, 257-260.
12. V. Rauniyar and D. G. Hall, *J. Org. Chem.*, 2009, **74**, 4236-4241.
13. S. Y. Sit, C. M. Conway, K. Xie, R. Bertekap, C. Bourin and K. D. Burris, *Bioorg. Med. Chem. Lett.*, 2010, **20**, 1272-1277.
14. J.-y. Hasegawa, M. Hamada, T. Miyamoto, K. Nishide, T. Kajimoto, J.-i. Uenishi and M. Node, *Carbohydr. Res.*, 2005, **340**, 2360-2368.
15. G. D. Vilela, R. R. da Rosa, P. H. Schneider, I. H. Bechtold, J. Eccher and A. A. Merlo, *Tetrahedron Lett.*, 2011, **52**, 6569-6572.
16. M. M. Flook, J. Börner, S. M. Kilyanek, L. C. H. Gerber and R. R. Schrock, *Organometallics*, 2012, **31**, 6231-6243.
17. (a) M. Dejmek, H. Hrebabecky, M. Sala, M. Dracinsky and R. Nencka, *Synthesis*, 2011, 4077-4083; (b) S. M. Hickey, S. K. Tripcony, R. Li, R. J. Williams and F. M. Pfeffer, *Supramol. Chem.*, 2015, **27**, 425-435.
18. L. C. Henderson, J. Li, R. L. Nation, T. Velkov and F. M. Pfeffer, *Chem. Commun.*, 2010, **46**, 3197-3199.
19. T. J. Donohoe, A. Jahanshahi, M. J. Tucker, F. L. Bhatti, I. A. Roslan, M. Kabeshov and G. Wrigley, *Chem. Commun.*, 2011, **47**, 5849-5851.
20. D. E. Rajsfus, S. Alter-Zilberfarb and A. A. Frimer, *J. Fluorine Chem.*, 2013, **148**, 49-58.
21. A. T. Blomquist and E. C. Winslow, *J. Org. Chem.*, 1945, **10**, 149-158.
22. N. Hamanaka, T. Seko, T. Miyazaki, M. Naka, K. Furuta and H. Yamamoto, *Tetrahedron Lett.*, 1989, **30**, 2399-2402.
23. A. J. M. Janssen, A. J. H. Klunder and B. Zwanenburg, *Tetrahedron*, 1991, **47**, 5513-5538.
24. G. M. Sheldrick, *Acta Cryst.*, 2007, **64**, 112-122.
25. L. J. Farrugia, *J. Appl. Cryst.*, 1997, **30**, 565-565.
26. (a) L. J. Farrugia, *J. Appl. Cryst.*, 1999, **32**, 837-838; (b) P. Van der Sluis and A. Spek, *Acta Cryst.*, 1990, **46**, 194-201.
